# Supplementary material for: Single atom alloys vs. phase separated alloys in Cu, Ag, and Au atoms with Ni(111) and Ni, Pd, and Pt atoms with Cu(111): a theoretical exploration
Source: Royal Society of Chemistry journal article supplement (doi:10.1039/d2cp00578f), 2022-01-01
Supplement: d2cp00578f1.pdf [file d2cp00578f1.pdf]

**Coordination Contents:**

- (1) X/M(111)
- (2) 2X/M(111)
- (3) 3X/M(111)
- (4) 4X/M(111)
- (5) CO on Ni(111)
- (6) CO on Cu(111)
- (7) CO on Pd(111)
- (8) CO on Pt(111)
- (9) CO on nX/M(111)

| (1) X/M(111) |                    |                     |                     |   |   |   |
|--------------|--------------------|---------------------|---------------------|---|---|---|
| Cu/Ni(111)   | 1.0000000000000000 |                     |                     |   |   |   |
|              | 8.6223998537762050 | -4.9781448766382850 | 0.0000000000000000  |   |   |   |
|              | 0.0000000000000000 | 9.9562897532765700  | 0.0000000000000000  |   |   |   |
|              | 0.0000000000000000 | 0.0000000000000000  | 23.1292765422760382 |   |   |   |
|              | Ni                 | Cu                  |                     |   |   |   |
|              | 79                 | 1                   |                     |   |   |   |
|              | Selective dynamics |                     |                     |   |   |   |
|              | Direct             |                     |                     |   |   |   |
|              | 0.0000000000000000 | 0.0000000000000000  | 0.1392871528000015  | F | F | F |
|              | 0.9999996353090737 | 0.0000003646909263  | 0.4015356392611125  | T | T | T |
|              | 0.1666666667000030 | 0.083333332999970   | 0.0514193316000018  | F | F | F |
|              | 0.1671641961507788 | 0.0835294659453254  | 0.3144309256610143  | T | T | T |
|              | 0.0833951807452422 | 0.1668094904869051  | 0.2269490183652394  | T | T | T |
|              | 0.2500000000000000 | 0.0000000000000000  | 0.1392871528000015  | F | F | F |
|              | 0.2499788741524256 | 0.9999577483048512  | 0.4011537014791813  | T | T | T |
|              | 0.4166666667000030 | 0.083333332999970   | 0.0514193316000018  | F | F | F |
|              | 0.4163652698945555 | 0.0835294659453254  | 0.3144309256610143  | T | T | T |
|              | 0.3333220459778303 | 0.1666440920556767  | 0.2267720598664624  | T | T | T |
|              | 0.5000000000000000 | 0.0000000000000000  | 0.1392871528000015  | F | F | F |
|              | 0.5000007293818527 | 0.0000003646909263  | 0.4015356392611125  | T | T | T |
|              | 0.6666666667000030 | 0.083333332999970   | 0.0514193316000018  | F | F | F |
|              | 0.6665989505370291 | 0.0832994752185101  | 0.3147256647665913  | T | T | T |
|              | 0.5834143096416540 | 0.1668094904869051  | 0.2269490183652394  | T | T | T |
|              | 0.7500000000000000 | 0.0000000000000000  | 0.1392871528000015  | F | F | F |
|              | 0.7501639755912350 | 0.0003279511824630  | 0.4014705770530185  | T | T | T |
|              | 0.9166666667000030 | 0.083333332999970   | 0.0514193316000018  | F | F | F |
|              | 0.9167005247814899 | 0.0832994752185101  | 0.3147256647665913  | T | T | T |
|              | 0.833333332999970  | 0.1666666667000030  | 0.2270260577509617  | T | T | T |
|              | 0.0000000000000000 | 0.2500000000000000  | 0.1392871528000015  | F | F | F |
|              | 0.9996720488175370 | 0.2498360244087650  | 0.4014705770530185  | T | T | T |
|              | 0.1666666667000030 | 0.333333332999970   | 0.0514193316000018  | F | F | F |
|              | 0.1667308177071831 | 0.3333654088035871  | 0.3147501377505932  | T | T | T |
|              | 0.0833951807452422 | 0.4165856903583460  | 0.2269490183652394  | T | T | T |
|              | 0.2500000000000000 | 0.2500000000000000  | 0.1392871528000015  | F | F | F |
|              | 0.2476548320323033 | 0.2478315111036054  | 0.4011527674267512  | T | T | T |
|              | 0.4166666667000030 | 0.333333332999970   | 0.0514193316000018  | F | F | F |
|              | 0.4169281104481470 | 0.3338562207962852  | 0.3150367052614413  | T | T | T |

|                    |                    |                    |   |   |   |
|--------------------|--------------------|--------------------|---|---|---|
| 0.3332324143382763 | 0.4166162072191426 | 0.2270989424456857 | T | T | T |
| 0.5000000000000000 | 0.2500000000000000 | 0.1392871528000015 | F | F | F |
| 0.5001766790713020 | 0.2478315111036054 | 0.4011527674267512 | T | T | T |
| 0.6666666667000030 | 0.3333333332999970 | 0.0514193316000018 | F | F | F |
| 0.6666345911964129 | 0.3333654088035871 | 0.3147501377505932 | T | T | T |
| 0.5833837927808574 | 0.4166162072191426 | 0.2270989424456857 | T | T | T |
| 0.7500000000000000 | 0.2500000000000000 | 0.1392871528000015 | F | F | F |
| 0.7501639755912350 | 0.2498360244087650 | 0.4014705770530185 | T | T | T |
| 0.9166666667000030 | 0.3333333332999970 | 0.0514193316000018 | F | F | F |
| 0.9167005247814899 | 0.3334010494629709 | 0.3147256647665913 | T | T | T |
| 0.8331905095130949 | 0.4165856903583460 | 0.2269490183652394 | T | T | T |
| 0.0000000000000000 | 0.5000000000000000 | 0.1392871528000015 | F | F | F |
| 0.9999996353090737 | 0.4999992706181473 | 0.4015356392611125 | T | T | T |
| 0.1666666667000030 | 0.5833333332999970 | 0.0514193316000018 | F | F | F |
| 0.1671641961507788 | 0.5836347301054445 | 0.3144309256610143 | T | T | T |
| 0.0833693268135960 | 0.6667386537272009 | 0.2269291701193197 | T | T | T |
| 0.2500000000000000 | 0.5000000000000000 | 0.1392871528000015 | F | F | F |
| 0.2476548320323033 | 0.4998233209286980 | 0.4011527674267512 | T | T | T |
| 0.4166666667000030 | 0.5833333332999970 | 0.0514193316000018 | F | F | F |
| 0.4169281104481470 | 0.5830718895518530 | 0.3150367052614413 | T | T | T |
| 0.3333220459778303 | 0.6666779540221697 | 0.2267720598664624 | T | T | T |
| 0.5000000000000000 | 0.5000000000000000 | 0.1392871528000015 | F | F | F |
| 0.6666666667000030 | 0.5833333332999970 | 0.0514193316000018 | F | F | F |
| 0.6661437792037148 | 0.5830718895518530 | 0.3150367052614413 | T | T | T |
| 0.5833837927808574 | 0.6667675856617237 | 0.2270989424456857 | T | T | T |
| 0.7500000000000000 | 0.5000000000000000 | 0.1392871528000015 | F | F | F |
| 0.7521684888963946 | 0.4998233209286980 | 0.4011527674267512 | T | T | T |
| 0.9166666667000030 | 0.5833333332999970 | 0.0514193316000018 | F | F | F |
| 0.9164705340546746 | 0.5836347301054445 | 0.3144309256610143 | T | T | T |
| 0.8333559079443233 | 0.6666779540221697 | 0.2267720598664624 | T | T | T |
| 0.0000000000000000 | 0.7500000000000000 | 0.1392871528000015 | F | F | F |
| 0.0000422516951488 | 0.7500211258475744 | 0.4011537014791813 | T | T | T |
| 0.1666666667000030 | 0.8333333332999970 | 0.0514193316000018 | F | F | F |
| 0.1666666667000030 | 0.8333333332999970 | 0.3145553644534616 | T | T | T |
| 0.0833693268135960 | 0.9166306731864040 | 0.2269291701193197 | T | T | T |
| 0.2500000000000000 | 0.7500000000000000 | 0.1392871528000015 | F | F | F |
| 0.2499788741524256 | 0.7500211258475744 | 0.4011537014791813 | T | T | T |
| 0.4166666667000030 | 0.8333333332999970 | 0.0514193316000018 | F | F | F |
| 0.4163652698945555 | 0.8328358038492212 | 0.3144309256610143 | T | T | T |
| 0.3332613462727991 | 0.9166306731864040 | 0.2269291701193197 | T | T | T |
| 0.5000000000000000 | 0.7500000000000000 | 0.1392871528000015 | F | F | F |
| 0.5001766790713020 | 0.7523451679676967 | 0.4011527674267512 | T | T | T |
| 0.6666666667000030 | 0.8333333332999970 | 0.0514193316000018 | F | F | F |
| 0.6666345911964129 | 0.8332691822928169 | 0.3147501377505932 | T | T | T |
| 0.5834143096416540 | 0.9166048192547578 | 0.2269490183652394 | T | T | T |
| 0.7500000000000000 | 0.7500000000000000 | 0.1392871528000015 | F | F | F |
| 0.7521684888963946 | 0.7523451679676967 | 0.4011527674267512 | T | T | T |
| 0.9166666667000030 | 0.8333333332999970 | 0.0514193316000018 | F | F | F |
| 0.9164705340546746 | 0.8328358038492212 | 0.3144309256610143 | T | T | T |
| 0.8331905095130949 | 0.9166048192547578 | 0.2269490183652394 | T | T | T |
| 0.5000000000000000 | 0.5000000000000000 | 0.4063775809481172 | T | T | T |

|                    |                    |                     |                     |       |
|--------------------|--------------------|---------------------|---------------------|-------|
| Ag/Ni(111)         | 1.0000000000000000 |                     |                     |       |
|                    | 8.6223998537762050 | -4.9781448766382850 | 0.0000000000000000  |       |
|                    | 0.0000000000000000 | 9.9562897532765700  | 0.0000000000000000  |       |
|                    | 0.0000000000000000 | 0.0000000000000000  | 23.1292765422760382 |       |
|                    | Ni                 | Ag                  |                     |       |
|                    | 79                 | 1                   |                     |       |
|                    | Selective dynamics |                     |                     |       |
|                    | Direct             |                     |                     |       |
|                    | 0.0000000000000000 | 0.0000000000000000  | 0.1392871528000015  | F F F |
|                    | 0.0001072651808158 | 0.9998927348191842  | 0.4012285508306377  | T T T |
| 0.1666666667000030 | 0.0833333332999970 | 0.0514193316000018  | F F F               |       |
| 0.1671697837766999 | 0.0833699561892445 | 0.3140581462795708  | T T T               |       |
| 0.0834543857270234 | 0.1669631498197433 | 0.2268478174539581  | T T T               |       |
| 0.2500000000000000 | 0.0000000000000000 | 0.1392871528000015  | F F F               |       |
| 0.2495865740936409 | 0.9991731481872819 | 0.4008450602789893  | T T T               |       |
| 0.4166666667000030 | 0.0833333332999970 | 0.0514193316000018  | F F F               |       |
| 0.4162001725125606 | 0.0833699561892445 | 0.3140581462795708  | T T T               |       |
| 0.3334729038491702 | 0.1669458077983563 | 0.2268366898520071  | T T T               |       |
| 0.5000000000000000 | 0.0000000000000000 | 0.1392871528000015  | F F F               |       |
| 0.4997854696383754 | 0.9998927348191842 | 0.4012285508306377  | T T T               |       |
| 0.6666666667000030 | 0.0833333332999970 | 0.0514193316000018  | F F F               |       |
| 0.6665833452495349 | 0.0832916725747594 | 0.3145411569705416  | T T T               |       |
| 0.5835087639927110 | 0.1669631498197433 | 0.2268478174539581  | T T T               |       |
| 0.7500000000000000 | 0.0000000000000000 | 0.1392871528000015  | F F F               |       |
| 0.7506395137622306 | 0.0012790275244541 | 0.4014100650814498  | T T T               |       |
| 0.9166666667000030 | 0.0833333332999970 | 0.0514193316000018  | F F F               |       |
| 0.9167083274252406 | 0.0832916725747594 | 0.3145411569705416  | T T T               |       |
| 0.8333333332999970 | 0.1666666667000030 | 0.2267996291097631  | T T T               |       |
| 0.0000000000000000 | 0.2500000000000000 | 0.1392871528000015  | F F F               |       |
| 0.9987209724755459 | 0.2493604862377694 | 0.4014100650814498  | T T T               |       |
| 0.1666666667000030 | 0.3333333332999970 | 0.0514193316000018  | F F F               |       |
| 0.1667613930014085 | 0.3333806964506962 | 0.3147526525605073  | T T T               |       |
| 0.0834543857270234 | 0.4164912360072890 | 0.2268478174539581  | T T T               |       |
| 0.2500000000000000 | 0.2500000000000000 | 0.1392871528000015  | F F F               |       |
| 0.2426913890313500 | 0.2432175835001047 | 0.4010419324083188  | T T T               |       |
| 0.4166666667000030 | 0.3333333332999970 | 0.0514193316000018  | F F F               |       |
| 0.4172651265252938 | 0.3345302529505787 | 0.3162190421803146  | T T T               |       |
| 0.3334557634387565 | 0.4167278817693827 | 0.2274495811952804  | T T T               |       |
| 0.5000000000000000 | 0.2500000000000000 | 0.1392871528000015  | F F F               |       |
| 0.5005261944687476 | 0.2432175835001047 | 0.4010419324083188  | T T T               |       |
| 0.6666666667000030 | 0.3333333332999970 | 0.0514193316000018  | F F F               |       |
| 0.6666193035493038 | 0.3333806964506962 | 0.3147526525605073  | T T T               |       |
| 0.5832721182306173 | 0.4167278817693827 | 0.2274495811952804  | T T T               |       |
| 0.7500000000000000 | 0.2500000000000000 | 0.1392871528000015  | F F F               |       |
| 0.7506395137622306 | 0.2493604862377694 | 0.4014100650814498  | T T T               |       |
| 0.9166666667000030 | 0.3333333332999970 | 0.0514193316000018  | F F F               |       |
| 0.9167083274252406 | 0.3334166547504651 | 0.3145411569705416  | T T T               |       |
| 0.8330368501802567 | 0.4164912360072890 | 0.2268478174539581  | T T T               |       |
| 0.0000000000000000 | 0.5000000000000000 | 0.1392871528000015  | F F F               |       |
| 0.0001072651808158 | 0.5002145303616246 | 0.4012285508306377  | T T T               |       |
| 0.1666666667000030 | 0.5833333332999970 | 0.0514193316000018  | F F F               |       |

|                   |                    |                     |                     |   |   |   |
|-------------------|--------------------|---------------------|---------------------|---|---|---|
|                   | 0.1671697837766999 | 0.5837998274874394  | 0.3140581462795708  | T | T | T |
|                   | 0.0833145094617862 | 0.6666290190235813  | 0.2266708385337566  | T | T | T |
|                   | 0.2500000000000000 | 0.5000000000000000  | 0.1392871528000015  | F | F | F |
|                   | 0.2426913890313500 | 0.4994738055312524  | 0.4010419324083188  | T | T | T |
|                   | 0.4166666667000030 | 0.583333332999970   | 0.0514193316000018  | F | F | F |
|                   | 0.4172651265252938 | 0.5827348734747062  | 0.3162190421803146  | T | T | T |
|                   | 0.3334729038491702 | 0.6665270961508298  | 0.2268366898520071  | T | T | T |
|                   | 0.5000000000000000 | 0.5000000000000000  | 0.1392871528000015  | F | F | F |
|                   | 0.6666666667000030 | 0.583333332999970   | 0.0514193316000018  | F | F | F |
|                   | 0.6654697470494213 | 0.5827348734747062  | 0.3162190421803146  | T | T | T |
|                   | 0.5832721182306173 | 0.6665442365612435  | 0.2274495811952804  | T | T | T |
|                   | 0.7500000000000000 | 0.5000000000000000  | 0.1392871528000015  | F | F | F |
|                   | 0.7567824164998953 | 0.4994738055312524  | 0.4010419324083188  | T | T | T |
|                   | 0.9166666667000030 | 0.583333332999970   | 0.0514193316000018  | F | F | F |
|                   | 0.9166300438107555 | 0.5837998274874394  | 0.3140581462795708  | T | T | T |
|                   | 0.8330541922016437 | 0.6665270961508298  | 0.2268366898520071  | T | T | T |
|                   | 0.0000000000000000 | 0.7500000000000000  | 0.1392871528000015  | F | F | F |
|                   | 0.0008268518127181 | 0.7504134259063591  | 0.4008450602789893  | T | T | T |
|                   | 0.1666666667000030 | 0.833333332999970   | 0.0514193316000018  | F | F | F |
|                   | 0.1666666667000030 | 0.833333332999970   | 0.3140469388232248  | T | T | T |
|                   | 0.0833145094617862 | 0.9166854905382138  | 0.2266708385337566  | T | T | T |
|                   | 0.2500000000000000 | 0.7500000000000000  | 0.1392871528000015  | F | F | F |
|                   | 0.2495865740936409 | 0.7504134259063591  | 0.4008450602789893  | T | T | T |
|                   | 0.4166666667000030 | 0.833333332999970   | 0.0514193316000018  | F | F | F |
|                   | 0.4162001725125606 | 0.8328302162233001  | 0.3140581462795708  | T | T | T |
|                   | 0.3333709809764187 | 0.9166854905382138  | 0.2266708385337566  | T | T | T |
|                   | 0.5000000000000000 | 0.7500000000000000  | 0.1392871528000015  | F | F | F |
|                   | 0.5005261944687476 | 0.7573086109686500  | 0.4010419324083188  | T | T | T |
|                   | 0.6666666667000030 | 0.833333332999970   | 0.0514193316000018  | F | F | F |
|                   | 0.6666193035493038 | 0.8332386069985915  | 0.3147526525605073  | T | T | T |
|                   | 0.5835087639927110 | 0.9165456142729766  | 0.2268478174539581  | T | T | T |
|                   | 0.7500000000000000 | 0.7500000000000000  | 0.1392871528000015  | F | F | F |
|                   | 0.7567824164998953 | 0.7573086109686500  | 0.4010419324083188  | T | T | T |
|                   | 0.9166666667000030 | 0.833333332999970   | 0.0514193316000018  | F | F | F |
|                   | 0.9166300438107555 | 0.8328302162233001  | 0.3140581462795708  | T | T | T |
|                   | 0.8330368501802567 | 0.9165456142729766  | 0.2268478174539581  | T | T | T |
|                   | 0.5000000000000000 | 0.5000000000000000  | 0.4230056162900766  | T | T | T |
| <b>Au/Ni(111)</b> | 1.0000000000000000 |                     |                     |   |   |   |
|                   | 8.6223998537762050 | -4.9781448766382850 | 0.0000000000000000  |   |   |   |
|                   | 0.0000000000000000 | 9.9562897532765700  | 0.0000000000000000  |   |   |   |
|                   | 0.0000000000000000 | 0.0000000000000000  | 23.1292765422760382 |   |   |   |
|                   | Ni                 | Au                  |                     |   |   |   |
|                   | 79                 | 1                   |                     |   |   |   |
|                   | Selective dynamics |                     |                     |   |   |   |
|                   | Direct             |                     |                     |   |   |   |
|                   | 0.0000000000000000 | 0.0000000000000000  | 0.1392871528000015  | F | F | F |
|                   | 0.0000990621841552 | 0.9999009378158448  | 0.4013740292999444  | T | T | T |
|                   | 0.1666666667000030 | 0.083333332999970   | 0.0514193316000018  | F | F | F |
|                   | 0.1670961155463928 | 0.0833456909702264  | 0.3143396813759054  | T | T | T |
|                   | 0.0833878219781141 | 0.1668527806013032  | 0.2269115547669855  | T | T | T |
|                   | 0.2500000000000000 | 0.0000000000000000  | 0.1392871528000015  | F | F | F |

|                    |                    |                    |   |   |   |
|--------------------|--------------------|--------------------|---|---|---|
| 0.2494254249027748 | 0.9988508498055495 | 0.4010459421035861 | T | T | T |
| 0.4166666667000030 | 0.0833333332999970 | 0.0514193316000018 | F | F | F |
| 0.4162495755238353 | 0.0833456909702264 | 0.3143396813759054 | T | T | T |
| 0.3333806967087085 | 0.1667613935174259 | 0.2268475366011700 | T | T | T |
| 0.5000000000000000 | 0.0000000000000000 | 0.1392871528000015 | F | F | F |
| 0.4998018756316824 | 0.9999009378158448 | 0.4013740292999444 | T | T | T |
| 0.6666666667000030 | 0.0833333332999970 | 0.0514193316000018 | F | F | F |
| 0.6665248582436831 | 0.0832624290718371 | 0.3145960987897354 | T | T | T |
| 0.5834649585231801 | 0.1668527806013032 | 0.2269115547669855 | T | T | T |
| 0.7500000000000000 | 0.0000000000000000 | 0.1392871528000015 | F | F | F |
| 0.7507033942075125 | 0.0014067884150322 | 0.4014413973472202 | T | T | T |
| 0.9166666667000030 | 0.0833333332999970 | 0.0514193316000018 | F | F | F |
| 0.9167375709281629 | 0.0832624290718371 | 0.3145960987897354 | T | T | T |
| 0.8333333332999970 | 0.1666666667000030 | 0.2269372126857192 | T | T | T |
| 0.0000000000000000 | 0.2500000000000000 | 0.1392871528000015 | F | F | F |
| 0.9985932115849678 | 0.2492966057924875 | 0.4014413973472202 | T | T | T |
| 0.1666666667000030 | 0.3333333332999970 | 0.0514193316000018 | F | F | F |
| 0.1664490249040398 | 0.3332245124020119 | 0.3147565374456960 | T | T | T |
| 0.0833878219781141 | 0.4165350414768199 | 0.2269115547669855 | T | T | T |
| 0.2500000000000000 | 0.2500000000000000 | 0.1392871528000015 | F | F | F |
| 0.2434199349086299 | 0.2437200602193172 | 0.4016411174109109 | T | T | T |
| 0.4166666667000030 | 0.3333333332999970 | 0.0514193316000018 | F | F | F |
| 0.4166122171172759 | 0.3332244341345429 | 0.3152649241256285 | T | T | T |
| 0.3332731385116361 | 0.4166365693058225 | 0.2272723990870489 | T | T | T |
| 0.5000000000000000 | 0.2500000000000000 | 0.1392871528000015 | F | F | F |
| 0.5003001253106873 | 0.2437200602193172 | 0.4016411174109109 | T | T | T |
| 0.6666666667000030 | 0.3333333332999970 | 0.0514193316000018 | F | F | F |
| 0.6667754875979881 | 0.3332245124020119 | 0.3147565374456960 | T | T | T |
| 0.5833634306941775 | 0.4166365693058225 | 0.2272723990870489 | T | T | T |
| 0.7500000000000000 | 0.2500000000000000 | 0.1392871528000015 | F | F | F |
| 0.7507033942075125 | 0.2492966057924875 | 0.4014413973472202 | T | T | T |
| 0.9166666667000030 | 0.3333333332999970 | 0.0514193316000018 | F | F | F |
| 0.9167375709281629 | 0.3334751417563169 | 0.3145960987897354 | T | T | T |
| 0.8331472193986968 | 0.4165350414768199 | 0.2269115547669855 | T | T | T |
| 0.0000000000000000 | 0.5000000000000000 | 0.1392871528000015 | F | F | F |
| 0.0000990621841552 | 0.5001981243683176 | 0.4013740292999444 | T | T | T |
| 0.1666666667000030 | 0.5833333332999970 | 0.0514193316000018 | F | F | F |
| 0.1670961155463928 | 0.5837504244761647 | 0.3143396813759054 | T | T | T |
| 0.0833290671972051 | 0.6666581344944191 | 0.2267924300196498 | T | T | T |
| 0.2500000000000000 | 0.5000000000000000 | 0.1392871528000015 | F | F | F |
| 0.2434199349086299 | 0.4996998746893127 | 0.4016411174109109 | T | T | T |
| 0.4166666667000030 | 0.5833333332999970 | 0.0514193316000018 | F | F | F |
| 0.4166122171172759 | 0.5833877828827241 | 0.3152649241256285 | T | T | T |
| 0.3333806967087085 | 0.6666193032912915 | 0.2268475366011700 | T | T | T |
| 0.5000000000000000 | 0.5000000000000000 | 0.1392871528000015 | F | F | F |
| 0.6666666667000030 | 0.5833333332999970 | 0.0514193316000018 | F | F | F |
| 0.6667755658654571 | 0.5833877828827241 | 0.3152649241256285 | T | T | T |
| 0.5833634306941775 | 0.6667268614883639 | 0.2272723990870489 | T | T | T |
| 0.7500000000000000 | 0.5000000000000000 | 0.1392871528000015 | F | F | F |
| 0.7562799397806828 | 0.4996998746893127 | 0.4016411174109109 | T | T | T |
| 0.9166666667000030 | 0.5833333332999970 | 0.0514193316000018 | F | F | F |

|                   |                    |                     |                     |   |   |   |
|-------------------|--------------------|---------------------|---------------------|---|---|---|
|                   | 0.9166543090297736 | 0.5837504244761647  | 0.3143396813759054  | T | T | T |
|                   | 0.8332386064825741 | 0.6666193032912915  | 0.2268475366011700  | T | T | T |
|                   | 0.0000000000000000 | 0.7500000000000000  | 0.1392871528000015  | F | F | F |
|                   | 0.0011491501944505 | 0.7505745750972252  | 0.4010459421035861  | T | T | T |
|                   | 0.1666666667000030 | 0.8333333332999970  | 0.0514193316000018  | F | F | F |
|                   | 0.1666666667000030 | 0.8333333332999970  | 0.3141415157668632  | T | T | T |
|                   | 0.0833290671972051 | 0.9166709328027949  | 0.2267924300196498  | T | T | T |
|                   | 0.2500000000000000 | 0.7500000000000000  | 0.1392871528000015  | F | F | F |
|                   | 0.2494254249027748 | 0.7505745750972252  | 0.4010459421035861  | T | T | T |
|                   | 0.4166666667000030 | 0.8333333332999970  | 0.0514193316000018  | F | F | F |
|                   | 0.4162495755238353 | 0.8329038844536072  | 0.3143396813759054  | T | T | T |
|                   | 0.3333418655055809 | 0.9166709328027949  | 0.2267924300196498  | T | T | T |
|                   | 0.5000000000000000 | 0.7500000000000000  | 0.1392871528000015  | F | F | F |
|                   | 0.5003001253106873 | 0.7565800650913701  | 0.4016411174109109  | T | T | T |
|                   | 0.6666666667000030 | 0.8333333332999970  | 0.0514193316000018  | F | F | F |
|                   | 0.6667754875979881 | 0.8335509750959602  | 0.3147565374456960  | T | T | T |
|                   | 0.5834649585231801 | 0.9166121780218859  | 0.2269115547669855  | T | T | T |
|                   | 0.7500000000000000 | 0.7500000000000000  | 0.1392871528000015  | F | F | F |
|                   | 0.7562799397806828 | 0.7565800650913701  | 0.4016411174109109  | T | T | T |
|                   | 0.9166666667000030 | 0.8333333332999970  | 0.0514193316000018  | F | F | F |
|                   | 0.9166543090297736 | 0.8329038844536072  | 0.3143396813759054  | T | T | T |
|                   | 0.8331472193986968 | 0.9166121780218859  | 0.2269115547669855  | T | T | T |
|                   | 0.5000000000000000 | 0.5000000000000000  | 0.4176911382026134  | T | T | T |
| <b>Ni/Cu(111)</b> | 1.0000000000000000 |                     |                     |   |   |   |
|                   | 8.8905944857135406 | -5.1329871195825199 | -0.0000000000000010 |   |   |   |
|                   | 0.0000000000000000 | 10.2659742391650006 | 0.0000000000000010  |   |   |   |
|                   | 0.0000000000000000 | 0.0000000000000000  | 23.3821328661704015 |   |   |   |
|                   | Ni                 | Cu                  |                     |   |   |   |
|                   | 1                  | 79                  |                     |   |   |   |
|                   | Selective dynamics |                     |                     |   |   |   |
|                   | Direct             |                     |                     |   |   |   |
|                   | 0.5000000000000000 | 0.5000000000000000  | 0.3795757109775479  | T | T | T |
|                   | 0.0000000000000000 | 0.0000000000000000  | 0.1155258754999977  | F | F | F |
|                   | 0.0000120110479997 | 0.9999879889520003  | 0.3832768680248790  | T | T | T |
|                   | 0.1666666667000030 | 0.0833333332999970  | 0.0259047434999999  | F | F | F |
|                   | 0.1668003148177348 | 0.0836315997847521  | 0.2945116459540458  | T | T | T |
|                   | 0.0833220919608166 | 0.1666987079936106  | 0.2050336998382676  | T | T | T |
|                   | 0.2500000000000000 | 0.0000000000000000  | 0.1155258754999977  | F | F | F |
|                   | 0.2501675867419593 | 0.0003351734839185  | 0.3834111862314913  | T | T | T |
|                   | 0.4166666667000030 | 0.0833333332999970  | 0.0259047434999999  | F | F | F |
|                   | 0.4168312850670262 | 0.0836315997847521  | 0.2945116459540458  | T | T | T |
|                   | 0.3333712529243158 | 0.1667425059486476  | 0.2050446258927323  | T | T | T |
|                   | 0.5000000000000000 | 0.0000000000000000  | 0.1155258754999977  | F | F | F |
|                   | 0.4999759779040005 | 0.9999879889520003  | 0.3832768680248790  | T | T | T |
|                   | 0.6666666667000030 | 0.0833333332999970  | 0.0259047434999999  | F | F | F |
|                   | 0.6665929121651359 | 0.0832964560325635  | 0.2944656615515200  | T | T | T |
|                   | 0.5833766159327993 | 0.1666987079936106  | 0.2050336998382676  | T | T | T |
|                   | 0.7500000000000000 | 0.0000000000000000  | 0.1155258754999977  | F | F | F |
|                   | 0.7497569360200345 | 0.9995138720400831  | 0.3833117013257805  | T | T | T |
|                   | 0.9166666667000030 | 0.0833333332999970  | 0.0259047434999999  | F | F | F |
|                   | 0.9167035439674365 | 0.0832964560325635  | 0.2944656615515200  | T | T | T |

|                    |                    |                    |   |   |   |
|--------------------|--------------------|--------------------|---|---|---|
| 0.833333332999970  | 0.166666667000030  | 0.2050272403659861 | T | T | T |
| 0.000000000000000  | 0.250000000000000  | 0.1155258754999977 | F | F | F |
| 0.0004861279599169 | 0.2502430639799655 | 0.3833117013257805 | T | T | T |
| 0.166666667000030  | 0.333333332999970  | 0.0259047434999999 | F | F | F |
| 0.1668574729385597 | 0.3334287364192718 | 0.2944031056378051 | T | T | T |
| 0.0833220919608166 | 0.4166233840672007 | 0.2050336998382676 | T | T | T |
| 0.250000000000000  | 0.250000000000000  | 0.1155258754999977 | F | F | F |
| 0.2519783305529657 | 0.2518785527096767 | 0.3834400493455732 | T | T | T |
| 0.416666667000030  | 0.333333332999970  | 0.0259047434999999 | F | F | F |
| 0.4168624711113438 | 0.3337249421226858 | 0.2941302298100155 | T | T | T |
| 0.3331832765271230 | 0.4165916383135695 | 0.2047266732899189 | T | T | T |
| 0.500000000000000  | 0.250000000000000  | 0.1155258754999977 | F | F | F |
| 0.4999002221567110 | 0.2518785527096767 | 0.3834400493455732 | T | T | T |
| 0.666666667000030  | 0.333333332999970  | 0.0259047434999999 | F | F | F |
| 0.6665712635807282 | 0.3334287364192718 | 0.2944031056378051 | T | T | T |
| 0.5834083616864305 | 0.4165916383135695 | 0.2047266732899189 | T | T | T |
| 0.750000000000000  | 0.250000000000000  | 0.1155258754999977 | F | F | F |
| 0.7497569360200345 | 0.2502430639799655 | 0.3833117013257805 | T | T | T |
| 0.916666667000030  | 0.333333332999970  | 0.0259047434999999 | F | F | F |
| 0.9167035439674365 | 0.3334070878348641 | 0.2944656615515200 | T | T | T |
| 0.8333012920063894 | 0.4166233840672007 | 0.2050336998382676 | T | T | T |
| 0.000000000000000  | 0.500000000000000  | 0.1155258754999977 | F | F | F |
| 0.0000120110479997 | 0.5000240220959995 | 0.3832768680248790 | T | T | T |
| 0.166666667000030  | 0.583333332999970  | 0.0259047434999999 | F | F | F |
| 0.1668003148177348 | 0.5831687149329738 | 0.2945116459540458 | T | T | T |
| 0.0833287759239099 | 0.6666575519478215 | 0.2050618687929955 | T | T | T |
| 0.250000000000000  | 0.500000000000000  | 0.1155258754999977 | F | F | F |
| 0.2519783305529657 | 0.500097778432890  | 0.3834400493455732 | T | T | T |
| 0.416666667000030  | 0.583333332999970  | 0.0259047434999999 | F | F | F |
| 0.4168624711113438 | 0.5831375288886562 | 0.2941302298100155 | T | T | T |
| 0.3333712529243158 | 0.6666287470756842 | 0.2050446258927323 | T | T | T |
| 0.500000000000000  | 0.500000000000000  | 0.1155258754999977 | F | F | F |
| 0.666666667000030  | 0.583333332999970  | 0.0259047434999999 | F | F | F |
| 0.6662750578773142 | 0.5831375288886562 | 0.2941302298100155 | T | T | T |
| 0.5834083616864305 | 0.6668167234728770 | 0.2047266732899189 | T | T | T |
| 0.750000000000000  | 0.500000000000000  | 0.1155258754999977 | F | F | F |
| 0.7481214472903233 | 0.500097778432890  | 0.3834400493455732 | T | T | T |
| 0.916666667000030  | 0.583333332999970  | 0.0259047434999999 | F | F | F |
| 0.9163684002152479 | 0.5831687149329738 | 0.2945116459540458 | T | T | T |
| 0.8332574940513524 | 0.6666287470756842 | 0.2050446258927323 | T | T | T |
| 0.000000000000000  | 0.750000000000000  | 0.1155258754999977 | F | F | F |
| 0.9996648265160815 | 0.7498324132580407 | 0.3834111862314913 | T | T | T |
| 0.166666667000030  | 0.833333332999970  | 0.0259047434999999 | F | F | F |
| 0.166666667000030  | 0.833333332999970  | 0.2945436853376791 | T | T | T |
| 0.0833287759239099 | 0.9166712240760901 | 0.2050618687929955 | T | T | T |
| 0.250000000000000  | 0.750000000000000  | 0.1155258754999977 | F | F | F |
| 0.2501675867419593 | 0.7498324132580407 | 0.3834111862314913 | T | T | T |
| 0.416666667000030  | 0.833333332999970  | 0.0259047434999999 | F | F | F |
| 0.4168312850670262 | 0.8331996851822652 | 0.2945116459540458 | T | T | T |
| 0.3333424480521785 | 0.9166712240760901 | 0.2050618687929955 | T | T | T |
| 0.500000000000000  | 0.750000000000000  | 0.1155258754999977 | F | F | F |

|                   |                    |                     |                     |   |   |   |
|-------------------|--------------------|---------------------|---------------------|---|---|---|
|                   | 0.4999002221567110 | 0.7480216694470343  | 0.3834400493455732  | T | T | T |
|                   | 0.6666666667000030 | 0.8333333332999970  | 0.0259047434999999  | F | F | F |
|                   | 0.6665712635807282 | 0.8331425270614403  | 0.2944031056378051  | T | T | T |
|                   | 0.5833766159327993 | 0.9166779080391905  | 0.2050336998382676  | T | T | T |
|                   | 0.7500000000000000 | 0.7500000000000000  | 0.1155258754999977  | F | F | F |
|                   | 0.7481214472903233 | 0.7480216694470343  | 0.3834400493455732  | T | T | T |
|                   | 0.9166666667000030 | 0.8333333332999970  | 0.0259047434999999  | F | F | F |
|                   | 0.9163684002152479 | 0.8331996851822652  | 0.2945116459540458  | T | T | T |
|                   | 0.8333012920063894 | 0.9166779080391905  | 0.2050336998382676  | T | T | T |
| <b>Pd/Cu(111)</b> | 1.0000000000000000 |                     |                     |   |   |   |
|                   | 8.8905944857135406 | -5.1329871195825199 | -0.0000000000000010 |   |   |   |
|                   | 0.0000000000000000 | 10.2659742391650006 | 0.0000000000000010  |   |   |   |
|                   | 0.0000000000000000 | 0.0000000000000000  | 23.3821328661704015 |   |   |   |
|                   | Pd                 | Cu                  |                     |   |   |   |
|                   | 1                  | 79                  |                     |   |   |   |
|                   | Selective dynamics |                     |                     |   |   |   |
|                   | Direct             |                     |                     |   |   |   |
|                   | 0.5000000000000000 | 0.5000000000000000  | 0.3865501900938568  | T | T | T |
|                   | 0.0000000000000000 | 0.0000000000000000  | 0.1155258754999977  | F | F | F |
|                   | 0.0000416759687383 | 0.9999583240312617  | 0.3831679805830746  | T | T | T |
|                   | 0.1666666667000030 | 0.0833333332999970  | 0.0259047434999999  | F | F | F |
|                   | 0.1665823817276575 | 0.0832163840723510  | 0.2942365368931519  | T | T | T |
|                   | 0.0833705785525396 | 0.1667996748837197  | 0.2050135136619176  | T | T | T |
|                   | 0.2500000000000000 | 0.0000000000000000  | 0.1155258754999977  | F | F | F |
|                   | 0.2496520067597814 | 0.9993040135195486  | 0.3832760717019781  | T | T | T |
|                   | 0.4166666667000030 | 0.0833333332999970  | 0.0259047434999999  | F | F | F |
|                   | 0.4166340024447024 | 0.0832163840723510  | 0.2942365368931519  | T | T | T |
|                   | 0.3334698460465262 | 0.1669396921930542  | 0.2050039569563751  | T | T | T |
|                   | 0.5000000000000000 | 0.0000000000000000  | 0.1155258754999977  | F | F | F |
|                   | 0.4999166480625234 | 0.9999583240312617  | 0.3831679805830746  | T | T | T |
|                   | 0.6666666667000030 | 0.0833333332999970  | 0.0259047434999999  | F | F | F |
|                   | 0.6666216321471410 | 0.0833108160235696  | 0.2943068739297132  | T | T | T |
|                   | 0.5834290962311712 | 0.1667996748837197  | 0.2050135136619176  | T | T | T |
|                   | 0.7500000000000000 | 0.0000000000000000  | 0.1155258754999977  | F | F | F |
|                   | 0.7502905552753063 | 0.0005811105506197  | 0.3832496292077607  | T | T | T |
|                   | 0.9166666667000030 | 0.0833333332999970  | 0.0259047434999999  | F | F | F |
|                   | 0.9166891839764304 | 0.0833108160235696  | 0.2943068739297132  | T | T | T |
|                   | 0.8333333332999970 | 0.1666666667000030  | 0.2049045666083131  | T | T | T |
|                   | 0.0000000000000000 | 0.2500000000000000  | 0.1155258754999977  | F | F | F |
|                   | 0.9994188894493803 | 0.2497094447246937  | 0.3832496292077607  | T | T | T |
|                   | 0.1666666667000030 | 0.3333333332999970  | 0.0259047434999999  | F | F | F |
|                   | 0.1669465399407315 | 0.3334732699203542  | 0.2945176382690491  | T | T | T |
|                   | 0.0833705785525396 | 0.4165709037688288  | 0.2050135136619176  | T | T | T |
|                   | 0.2500000000000000 | 0.2500000000000000  | 0.1155258754999977  | F | F | F |
|                   | 0.2465060743216014 | 0.2464151925312805  | 0.3836747765038524  | T | T | T |
|                   | 0.4166666667000030 | 0.3333333332999970  | 0.0259047434999999  | F | F | F |
|                   | 0.4163394789369264 | 0.3326789577738367  | 0.2942020995202199  | T | T | T |
|                   | 0.3332710661060148 | 0.4166355331030118  | 0.2048473830162507  | T | T | T |
|                   | 0.5000000000000000 | 0.2500000000000000  | 0.1155258754999977  | F | F | F |
|                   | 0.4999091182096791 | 0.2464151925312805  | 0.3836747765038524  | T | T | T |
|                   | 0.6666666667000030 | 0.3333333332999970  | 0.0259047434999999  | F | F | F |



|                   |                    |                     |                     |   |   |   |
|-------------------|--------------------|---------------------|---------------------|---|---|---|
|                   | 0.6665267300796458 | 0.3334732699203542  | 0.2945176382690491  | T | T | T |
|                   | 0.5833644668969882 | 0.4166355331030118  | 0.2048473830162507  | T | T | T |
|                   | 0.7500000000000000 | 0.2500000000000000  | 0.1155258754999977  | F | F | F |
|                   | 0.7502905552753063 | 0.2497094447246937  | 0.3832496292077607  | T | T | T |
|                   | 0.9166666667000030 | 0.333333332999970   | 0.0259047434999999  | F | F | F |
|                   | 0.9166891839764304 | 0.3333783678528590  | 0.2943068739297132  | T | T | T |
|                   | 0.8332003251162803 | 0.4165709037688288  | 0.2050135136619176  | T | T | T |
|                   | 0.0000000000000000 | 0.5000000000000000  | 0.1155258754999977  | F | F | F |
|                   | 0.0000416759687383 | 0.5000833519374766  | 0.3831679805830746  | T | T | T |
|                   | 0.1666666667000030 | 0.583333332999970   | 0.0259047434999999  | F | F | F |
|                   | 0.1665823817276575 | 0.5833659975552976  | 0.2942365368931519  | T | T | T |
|                   | 0.0833147454941994 | 0.6666294910884218  | 0.2048557255063486  | T | T | T |
|                   | 0.2500000000000000 | 0.5000000000000000  | 0.1155258754999977  | F | F | F |
|                   | 0.2465060743216014 | 0.5000908817903209  | 0.3836747765038524  | T | T | T |
|                   | 0.4166666667000030 | 0.583333332999970   | 0.0259047434999999  | F | F | F |
|                   | 0.4163394789369264 | 0.5836605210630736  | 0.2942020995202199  | T | T | T |
|                   | 0.3334698460465262 | 0.6665301539534738  | 0.2050039569563751  | T | T | T |
|                   | 0.5000000000000000 | 0.5000000000000000  | 0.1155258754999977  | F | F | F |
|                   | 0.6666666667000030 | 0.583333332999970   | 0.0259047434999999  | F | F | F |
|                   | 0.6673210422261633 | 0.5836605210630736  | 0.2942020995202199  | T | T | T |
|                   | 0.5833644668969882 | 0.6667289338939852  | 0.2048473830162507  | T | T | T |
|                   | 0.7500000000000000 | 0.5000000000000000  | 0.1155258754999977  | F | F | F |
|                   | 0.7535848074687195 | 0.5000908817903209  | 0.3836747765038524  | T | T | T |
|                   | 0.9166666667000030 | 0.583333332999970   | 0.0259047434999999  | F | F | F |
|                   | 0.9167836159276490 | 0.5833659975552976  | 0.2942365368931519  | T | T | T |
|                   | 0.8330603078069458 | 0.6665301539534738  | 0.2050039569563751  | T | T | T |
|                   | 0.0000000000000000 | 0.7500000000000000  | 0.1155258754999977  | F | F | F |
|                   | 0.0006959864804514 | 0.7503479932402186  | 0.3832760717019781  | T | T | T |
|                   | 0.1666666667000030 | 0.833333332999970   | 0.0259047434999999  | F | F | F |
|                   | 0.1666666667000030 | 0.833333332999970   | 0.2941676316630151  | T | T | T |
|                   | 0.0833147454941994 | 0.9166852545058006  | 0.2048557255063486  | T | T | T |
|                   | 0.2500000000000000 | 0.7500000000000000  | 0.1155258754999977  | F | F | F |
|                   | 0.2496520067597814 | 0.7503479932402186  | 0.3832760717019781  | T | T | T |
|                   | 0.4166666667000030 | 0.833333332999970   | 0.0259047434999999  | F | F | F |
|                   | 0.4166340024447024 | 0.8334176182723425  | 0.2942365368931519  | T | T | T |
|                   | 0.3333705089115782 | 0.9166852545058006  | 0.2048557255063486  | T | T | T |
|                   | 0.5000000000000000 | 0.7500000000000000  | 0.1155258754999977  | F | F | F |
|                   | 0.4999091182096791 | 0.7534939256783986  | 0.3836747765038524  | T | T | T |
|                   | 0.6666666667000030 | 0.833333332999970   | 0.0259047434999999  | F | F | F |
|                   | 0.6665267300796458 | 0.8330534600592685  | 0.2945176382690491  | T | T | T |
|                   | 0.5834290962311712 | 0.9166294214474604  | 0.2050135136619176  | T | T | T |
|                   | 0.7500000000000000 | 0.7500000000000000  | 0.1155258754999977  | F | F | F |
|                   | 0.7535848074687195 | 0.7534939256783986  | 0.3836747765038524  | T | T | T |
|                   | 0.9166666667000030 | 0.833333332999970   | 0.0259047434999999  | F | F | F |
|                   | 0.9167836159276490 | 0.8334176182723425  | 0.2942365368931519  | T | T | T |
|                   | 0.8332003251162803 | 0.9166294214474604  | 0.2050135136619176  | T | T | T |
| <b>Pt/Cu(111)</b> | 1.0000000000000000 |                     |                     |   |   |   |
|                   | 8.8905944857135406 | -5.1329871195825199 | -0.0000000000000010 |   |   |   |
|                   | 0.0000000000000000 | 10.2659742391650006 | 0.0000000000000010  |   |   |   |
|                   | 0.0000000000000000 | 0.0000000000000000  | 23.3821328661704015 |   |   |   |
|                   | Pt                 | Cu                  |                     |   |   |   |

## Selective dynamics

## Direct

|                    |                    |                    |   |   |   |
|--------------------|--------------------|--------------------|---|---|---|
| 0.5000000000000000 | 0.5000000000000000 | 0.3844384201297970 | T | T | T |
| 0.0000000000000000 | 0.0000000000000000 | 0.1155258754999977 | F | F | F |
| 0.9999989773712485 | 0.0000010226287515 | 0.3832555484970968 | T | T | T |
| 0.1666666667000030 | 0.083333332999970  | 0.0259047434999999 | F | F | F |
| 0.1666303021149247 | 0.0834475002824107 | 0.2944864613748805 | T | T | T |
| 0.0833063005886743 | 0.1666770856778541 | 0.2049781189451281 | T | T | T |
| 0.2500000000000000 | 0.0000000000000000 | 0.1155258754999977 | F | F | F |
| 0.2496434669959626 | 0.9992869339919181 | 0.3833550849367597 | T | T | T |
| 0.4166666667000030 | 0.083333332999970  | 0.0259047434999999 | F | F | F |
| 0.4168171982674949 | 0.0834475002824107 | 0.2944864613748805 | T | T | T |
| 0.3333641918937218 | 0.1667283838874596 | 0.2049722568582197 | T | T | T |
| 0.5000000000000000 | 0.0000000000000000 | 0.1155258754999977 | F | F | F |
| 0.5000020452575171 | 0.0000010226287515 | 0.3832555484970968 | T | T | T |
| 0.6666666667000030 | 0.083333332999970  | 0.0259047434999999 | F | F | F |
| 0.6665960227947139 | 0.0832980113473525 | 0.2943690297427963 | T | T | T |
| 0.5833707849891852 | 0.1666770856778541 | 0.2049781189451281 | T | T | T |
| 0.7500000000000000 | 0.0000000000000000 | 0.1155258754999977 | F | F | F |
| 0.7502499418392858 | 0.0004998836785788 | 0.3832506585998274 | T | T | T |
| 0.9166666667000030 | 0.083333332999970  | 0.0259047434999999 | F | F | F |
| 0.9167019886526475 | 0.0832980113473525 | 0.2943690297427963 | T | T | T |
| 0.833333332999970  | 0.1666666667000030 | 0.2049958779990320 | T | T | T |
| 0.0000000000000000 | 0.2500000000000000 | 0.1155258754999977 | F | F | F |
| 0.9995001163214212 | 0.2497500581607142 | 0.3832506585998274 | T | T | T |
| 0.1666666667000030 | 0.333333332999970  | 0.0259047434999999 | F | F | F |
| 0.1663537393860324 | 0.3331768696430117 | 0.2944656541599997 | T | T | T |
| 0.0833063005886743 | 0.4166292150108148 | 0.2049781189451281 | T | T | T |
| 0.2500000000000000 | 0.2500000000000000 | 0.1155258754999977 | F | F | F |
| 0.2474773131071686 | 0.2473361188672669 | 0.3843872439735918 | T | T | T |
| 0.4166666667000030 | 0.333333332999970  | 0.0259047434999999 | F | F | F |
| 0.4157704420008059 | 0.3315408839016030 | 0.2935782344053095 | T | T | T |
| 0.3330377001888181 | 0.4165188501444135 | 0.2046830540510030 | T | T | T |
| 0.5000000000000000 | 0.2500000000000000 | 0.1155258754999977 | F | F | F |
| 0.4998588057600983 | 0.2473361188672669 | 0.3843872439735918 | T | T | T |
| 0.6666666667000030 | 0.333333332999970  | 0.0259047434999999 | F | F | F |
| 0.6668231303569883 | 0.3331768696430117 | 0.2944656541599997 | T | T | T |
| 0.5834811498555865 | 0.4165188501444135 | 0.2046830540510030 | T | T | T |
| 0.7500000000000000 | 0.2500000000000000 | 0.1155258754999977 | F | F | F |
| 0.7502499418392858 | 0.2497500581607142 | 0.3832506585998274 | T | T | T |
| 0.9166666667000030 | 0.333333332999970  | 0.0259047434999999 | F | F | F |
| 0.9167019886526475 | 0.3334039772052861 | 0.2943690297427963 | T | T | T |
| 0.8333229143221459 | 0.4166292150108148 | 0.2049781189451281 | T | T | T |
| 0.0000000000000000 | 0.5000000000000000 | 0.1155258754999977 | F | F | F |
| 0.9999989773712485 | 0.4999979547424829 | 0.3832555484970968 | T | T | T |
| 0.1666666667000030 | 0.583333332999970  | 0.0259047434999999 | F | F | F |
| 0.1666303021149247 | 0.5831828017325051 | 0.2944864613748805 | T | T | T |
| 0.0833159325916952 | 0.6666318652833851 | 0.2049777327966993 | T | T | T |
| 0.2500000000000000 | 0.5000000000000000 | 0.1155258754999977 | F | F | F |
| 0.2474773131071686 | 0.5001411942399017 | 0.3843872439735918 | T | T | T |

|                    |                    |                     |                     |   |   |   |
|--------------------|--------------------|---------------------|---------------------|---|---|---|
| 0.416666667000030  | 0.5833333332999970 | 0.0259047434999999  | F                   | F | F |   |
| 0.4157704420008059 | 0.5842295579991941 | 0.2935782344053095  | T                   | T | T |   |
| 0.3333641918937218 | 0.6666358081062782 | 0.2049722568582197  | T                   | T | T |   |
| 0.5000000000000000 | 0.5000000000000000 | 0.1155258754999977  | F                   | F | F |   |
| 0.666666667000030  | 0.5833333332999970 | 0.0259047434999999  | F                   | F | F |   |
| 0.6684591160983970 | 0.5842295579991941 | 0.2935782344053095  | T                   | T | T |   |
| 0.5834811498555865 | 0.6669622998111819 | 0.2046830540510030  | T                   | T | T |   |
| 0.7500000000000000 | 0.5000000000000000 | 0.1155258754999977  | F                   | F | F |   |
| 0.7526638811327331 | 0.5001411942399017 | 0.3843872439735918  | T                   | T | T |   |
| 0.916666667000030  | 0.5833333332999970 | 0.0259047434999999  | F                   | F | F |   |
| 0.9165524997175893 | 0.5831828017325051 | 0.2944864613748805  | T                   | T | T |   |
| 0.8332716161125404 | 0.6666358081062782 | 0.2049722568582197  | T                   | T | T |   |
| 0.0000000000000000 | 0.7500000000000000 | 0.1155258754999977  | F                   | F | F |   |
| 0.0007130660080819 | 0.7503565330040374 | 0.3833550849367597  | T                   | T | T |   |
| 0.166666667000030  | 0.8333333332999970 | 0.0259047434999999  | F                   | F | F |   |
| 0.166666667000030  | 0.8333333332999970 | 0.2942552419374564  | T                   | T | T |   |
| 0.0833159325916952 | 0.9166840674083048 | 0.2049777327966993  | T                   | T | T |   |
| 0.2500000000000000 | 0.7500000000000000 | 0.1155258754999977  | F                   | F | F |   |
| 0.2496434669959626 | 0.7503565330040374 | 0.3833550849367597  | T                   | T | T |   |
| 0.416666667000030  | 0.8333333332999970 | 0.0259047434999999  | F                   | F | F |   |
| 0.4168171982674949 | 0.8333696978850753 | 0.2944864613748805  | T                   | T | T |   |
| 0.3333681347166149 | 0.9166840674083048 | 0.2049777327966993  | T                   | T | T |   |
| 0.5000000000000000 | 0.7500000000000000 | 0.1155258754999977  | F                   | F | F |   |
| 0.4998588057600983 | 0.7525226868928314 | 0.3843872439735918  | T                   | T | T |   |
| 0.666666667000030  | 0.8333333332999970 | 0.0259047434999999  | F                   | F | F |   |
| 0.6668231303569883 | 0.8336462606139676 | 0.2944656541599997  | T                   | T | T |   |
| 0.5833707849891852 | 0.9166936994113257 | 0.2049781189451281  | T                   | T | T |   |
| 0.7500000000000000 | 0.7500000000000000 | 0.1155258754999977  | F                   | F | F |   |
| 0.7526638811327331 | 0.7525226868928314 | 0.3843872439735918  | T                   | T | T |   |
| 0.916666667000030  | 0.8333333332999970 | 0.0259047434999999  | F                   | F | F |   |
| 0.9165524997175893 | 0.8333696978850753 | 0.2944864613748805  | T                   | T | T |   |
| 0.8333229143221459 | 0.9166936994113257 | 0.2049781189451281  | T                   | T | T |   |
| <b>(2) 2X-S1</b>   |                    |                     |                     |   |   |   |
| <b>2Cu/Ni(111)</b> | 1.0000000000000000 |                     |                     |   |   |   |
|                    | 8.6224000674449712 | -4.9781450000000014 | 0.0000000000000000  |   |   |   |
|                    | 0.0000000000000000 | 9.9562900000000010  | 0.0000000000000000  |   |   |   |
|                    | 0.0000000000000000 | 0.0000000000000000  | 23.1292800000000014 |   |   |   |
|                    | Ni                 | Cu                  |                     |   |   |   |
|                    | 78                 | 2                   |                     |   |   |   |
|                    | Selective dynamics |                     |                     |   |   |   |
|                    | Direct             |                     |                     |   |   |   |
|                    | 0.0000000000000000 | 0.0000000000000000  | 0.1392870000000030  | F | F | F |
|                    | 0.0000725444057821 | 0.0021507519474540  | 0.4009851174421186  | T | T | T |
|                    | 0.1666669999999968 | 0.0833330000000032  | 0.0514190000000028  | F | F | F |
|                    | 0.1671625139084441 | 0.0833899710905470  | 0.3143538692610335  | T | T | T |
|                    | 0.0834521118154896 | 0.1667673491848305  | 0.2268654956235778  | T | T | T |
|                    | 0.2500000000000000 | 0.0000000000000000  | 0.1392870000000030  | F | F | F |
|                    | 0.2520154992745418 | 0.0024607583670857  | 0.4009983678140472  | T | T | T |
|                    | 0.4166669999999968 | 0.0833330000000032  | 0.0514190000000028  | F | F | F |
|                    | 0.4163791451791212 | 0.0833772108405029  | 0.3142022620711842  | T | T | T |
|                    | 0.3333048000507901 | 0.1666033333924020  | 0.2267003916851351  | T | T | T |

|                    |                    |                    |       |
|--------------------|--------------------|--------------------|-------|
| 0.5000000000000000 | 0.0000000000000000 | 0.1392870000000030 | F F F |
| 0.4996781596847697 | 0.9998385798423826 | 0.4012740924560561 | T T T |
| 0.6666669999999968 | 0.0833330000000032 | 0.0514190000000028 | F F F |
| 0.6665312248866115 | 0.0832651124433070 | 0.3145679101564838 | T T T |
| 0.5834318455385343 | 0.1669015305606507 | 0.2268603604355661 | T T T |
| 0.7500000000000000 | 0.0000000000000000 | 0.1392870000000030 | F F F |
| 0.7500096869153410 | 0.0001515905359710 | 0.4011114182638806 | T T T |
| 0.9166669999999968 | 0.0833330000000032 | 0.0514190000000028 | F F F |
| 0.9162941307761514 | 0.0830564220133994 | 0.3143388335803579 | T T T |
| 0.8333197283507872 | 0.1666603641753923 | 0.2268380255461153 | T T T |
| 0.0000000000000000 | 0.2500000000000000 | 0.1392870000000030 | F F F |
| 0.9995163973333092 | 0.2497581986666546 | 0.4012377695923846 | T T T |
| 0.1666669999999968 | 0.3333330000000032 | 0.0514190000000028 | F F F |
| 0.1666383659613899 | 0.3333186829806962 | 0.3144970213946863 | T T T |
| 0.0834521118154896 | 0.4166847626306520 | 0.2268654956235778 | T T T |
| 0.2500000000000000 | 0.2500000000000000 | 0.1392870000000030 | F F F |
| 0.2477782636875148 | 0.2482924581934611 | 0.4010920064305239 | T T T |
| 0.4166669999999968 | 0.3333330000000032 | 0.0514190000000028 | F F F |
| 0.4169310849229859 | 0.3336855005659558 | 0.3149161932911753 | T T T |
| 0.3333331605532166 | 0.4166665802766047 | 0.2270084296748180 | T T T |
| 0.5000000000000000 | 0.2500000000000000 | 0.1392870000000030 | F F F |
| 0.5003669280535092 | 0.2479831525359089 | 0.4011189768470587 | T T T |
| 0.6666669999999968 | 0.3333330000000032 | 0.0514190000000028 | F F F |
| 0.6667902461902813 | 0.3334660072586999 | 0.3142578085819068 | T T T |
| 0.5834167091181186 | 0.4167451716685235 | 0.2269947879866621 | T T T |
| 0.7500000000000000 | 0.2500000000000000 | 0.1392870000000030 | F F F |
| 0.7500096869153410 | 0.2498580963793700 | 0.4011114182638806 | T T T |
| 0.9166669999999968 | 0.3333330000000032 | 0.0514190000000028 | F F F |
| 0.9162941307761514 | 0.3332367087627546 | 0.3143388335803579 | T T T |
| 0.8332403376607260 | 0.4166289364494986 | 0.2267379666950120 | T T T |
| 0.0000000000000000 | 0.5000000000000000 | 0.1392870000000030 | F F F |
| 0.0000725444057821 | 0.4979207924583307 | 0.4009851174421186 | T T T |
| 0.1666669999999968 | 0.5833330000000032 | 0.0514190000000028 | F F F |
| 0.1671625139084441 | 0.5837725428178970 | 0.3143538692610335 | T T T |
| 0.0834068300929758 | 0.6669768277578498 | 0.2270476860199366 | T T T |
| 0.2500000000000000 | 0.5000000000000000 | 0.1392870000000030 | F F F |
| 0.2477782636875148 | 0.4994858054940536 | 0.4010920064305239 | T T T |
| 0.4166669999999968 | 0.5833330000000032 | 0.0514190000000028 | F F F |
| 0.4169310849229859 | 0.5832455843570372 | 0.3149161932911753 | T T T |
| 0.3333048000507901 | 0.6667014666583881 | 0.2267003916851351 | T T T |
| 0.5000000000000000 | 0.5000000000000000 | 0.1392870000000030 | F F F |
| 0.6666669999999968 | 0.5833330000000032 | 0.0514190000000028 | F F F |
| 0.6662734833303716 | 0.5831367416651858 | 0.3150031023009348 | T T T |
| 0.5834167091181186 | 0.6666715374495880 | 0.2269947879866621 | T T T |
| 0.7500000000000000 | 0.5000000000000000 | 0.1392870000000030 | F F F |
| 0.7497055296258495 | 0.4979338032939822 | 0.4009553906938521 | T T T |
| 0.9166669999999968 | 0.5833330000000032 | 0.0514190000000028 | F F F |
| 0.9168981422004236 | 0.5841378601629117 | 0.3147208832544521 | T T T |
| 0.8334064694495709 | 0.6667032347247854 | 0.2268840745485363 | T T T |
| 0.0000000000000000 | 0.7500000000000000 | 0.1392870000000030 | F F F |
| 0.1666669999999968 | 0.8333330000000032 | 0.0514190000000028 | F F F |

|                    |                    |                     |                     |   |   |   |
|--------------------|--------------------|---------------------|---------------------|---|---|---|
|                    | 0.1664669400200296 | 0.8332329700100161  | 0.3150259455204321  | T | T | T |
|                    | 0.0834068300929758 | 0.9164310023351305  | 0.2270476860199366  | T | T | T |
|                    | 0.2500000000000000 | 0.7500000000000000  | 0.1392870000000030  | F | F | F |
|                    | 0.2520154992745418 | 0.7495547409074490  | 0.4009983678140472  | T | T | T |
|                    | 0.4166669999999968 | 0.8333330000000032  | 0.0514190000000028  | F | F | F |
|                    | 0.4163791451791212 | 0.8330019343386184  | 0.3142022620711842  | T | T | T |
|                    | 0.3333973268201262 | 0.9166991634100654  | 0.2268264324973188  | T | T | T |
|                    | 0.5000000000000000 | 0.7500000000000000  | 0.1392870000000030  | F | F | F |
|                    | 0.5003669280535092 | 0.7523837755176004  | 0.4011189768470587  | T | T | T |
|                    | 0.6666669999999968 | 0.8333330000000032  | 0.0514190000000028  | F | F | F |
|                    | 0.6667902461902813 | 0.8333232389315839  | 0.3142578085819068  | T | T | T |
|                    | 0.5834318455385343 | 0.9165303149778907  | 0.2268603604355661  | T | T | T |
|                    | 0.7500000000000000 | 0.7500000000000000  | 0.1392870000000030  | F | F | F |
|                    | 0.7497055296258495 | 0.7517717263318602  | 0.4009553906938521  | T | T | T |
|                    | 0.9166669999999968 | 0.8333330000000032  | 0.0514190000000028  | F | F | F |
|                    | 0.9168981422004236 | 0.8327602820375191  | 0.3147208832544521  | T | T | T |
|                    | 0.8332403376607260 | 0.9166114012112274  | 0.2267379666950120  | T | T | T |
|                    | 0.0003385268539731 | 0.7501692634269830  | 0.4063156779272390  | T | T | T |
|                    | 0.4994097768988865 | 0.4997048884494433  | 0.4063754647250306  | T | T | T |
| <b>2Ag/Ni(111)</b> | 1.0000000000000000 |                     |                     |   |   |   |
|                    | 8.6224000674449712 | -4.9781450000000014 | 0.0000000000000000  |   |   |   |
|                    | 0.0000000000000000 | 9.9562900000000010  | 0.0000000000000000  |   |   |   |
|                    | 0.0000000000000000 | 0.0000000000000000  | 23.1292800000000014 |   |   |   |
|                    | Ni                 | Ag                  |                     |   |   |   |
|                    | 78                 | 2                   |                     |   |   |   |
|                    | Selective dynamics |                     |                     |   |   |   |
|                    | Direct             |                     |                     |   |   |   |
|                    | 0.0000000000000000 | 0.0000000000000000  | 0.1392870000000030  | F | F | F |
|                    | 0.9994901784246224 | 0.0062568810289250  | 0.4007260376976873  | T | T | T |
|                    | 0.1666669999999968 | 0.0833330000000032  | 0.0514190000000028  | F | F | F |
|                    | 0.1670328046980742 | 0.0832218869558545  | 0.3140012544548512  | T | T | T |
|                    | 0.0836478950474699 | 0.1667464364411657  | 0.2266443018938915  | T | T | T |
|                    | 0.2500000000000000 | 0.0000000000000000  | 0.1392870000000030  | F | F | F |
|                    | 0.2557165758309665 | 0.0062273805525379  | 0.4003990687922467  | T | T | T |
|                    | 0.4166669999999968 | 0.0833330000000032  | 0.0514190000000028  | F | F | F |
|                    | 0.4160947550709011 | 0.0832231796735812  | 0.3132090773617051  | T | T | T |
|                    | 0.3333944989534317 | 0.1671151416992345  | 0.2266684666466574  | T | T | T |
|                    | 0.5000000000000000 | 0.0000000000000000  | 0.1392870000000030  | F | F | F |
|                    | 0.4998977984541852 | 0.9999483992270939  | 0.4000546537504093  | T | T | T |
|                    | 0.6666669999999968 | 0.0833330000000032  | 0.0514190000000028  | F | F | F |
|                    | 0.6664019608988028 | 0.0832004804493991  | 0.3136806781377715  | T | T | T |
|                    | 0.5833948978935695 | 0.1669484986544774  | 0.2264181730540429  | T | T | T |
|                    | 0.7500000000000000 | 0.0000000000000000  | 0.1392870000000030  | F | F | F |
|                    | 0.7499360149658258 | 0.0019795341170976  | 0.4005232004492854  | T | T | T |
|                    | 0.9166669999999968 | 0.0833330000000032  | 0.0514190000000028  | F | F | F |
|                    | 0.9162304071289213 | 0.0830415362096488  | 0.3136745224767736  | T | T | T |
|                    | 0.8333997499788524 | 0.1667003749894178  | 0.2263588077124155  | T | T | T |
|                    | 0.0000000000000000 | 0.2500000000000000  | 0.1392870000000030  | F | F | F |
|                    | 0.9984661140156703 | 0.2492330570078423  | 0.4009419681182891  | T | T | T |
|                    | 0.1666669999999968 | 0.3333330000000032  | 0.0514190000000028  | F | F | F |
|                    | 0.1666503539261797 | 0.3333246769630946  | 0.3141796963854304  | T | T | T |

|                    |                    |                    |   |   |   |
|--------------------|--------------------|--------------------|---|---|---|
| 0.0836478950474699 | 0.4169014586063042 | 0.2266443018938915 | T | T | T |
| 0.2500000000000000 | 0.2500000000000000 | 0.1392870000000030 | F | F | F |
| 0.2434182982047730 | 0.2449887490813794 | 0.4008330716893909 | T | T | T |
| 0.4166669999999968 | 0.3333330000000032 | 0.0514190000000028 | F | F | F |
| 0.4174870586958548 | 0.3348269100520014 | 0.3160147301793472 | T | T | T |
| 0.3333981983427208 | 0.4166990991713604 | 0.2272509059678853 | T | T | T |
| 0.5000000000000000 | 0.2500000000000000 | 0.1392870000000030 | F | F | F |
| 0.5015808907789534 | 0.2441774535896926 | 0.4005709588256963 | T | T | T |
| 0.6666669999999968 | 0.3333330000000032 | 0.0514190000000028 | F | F | F |
| 0.6667478543860312 | 0.3333600908082843 | 0.3135635187229582 | T | T | T |
| 0.5832979523219564 | 0.4170622862049029 | 0.2272105543164074 | T | T | T |
| 0.7500000000000000 | 0.2500000000000000 | 0.1392870000000030 | F | F | F |
| 0.7499360149658258 | 0.2479564808487353 | 0.4005232004492854 | T | T | T |
| 0.9166669999999968 | 0.3333330000000032 | 0.0514190000000028 | F | F | F |
| 0.9162304071289213 | 0.3331878709192679 | 0.3136745224767736 | T | T | T |
| 0.8336327565699619 | 0.4173286430513059 | 0.2266738734803937 | T | T | T |
| 0.0000000000000000 | 0.5000000000000000 | 0.1392870000000030 | F | F | F |
| 0.9994901784246224 | 0.4932322973957000 | 0.4007260376976873 | T | T | T |
| 0.1666669999999968 | 0.5833330000000032 | 0.0514190000000028 | F | F | F |
| 0.1670328046980742 | 0.5838109177422197 | 0.3140012544548512 | T | T | T |
| 0.0832257840714021 | 0.6671639501791020 | 0.2272254392326971 | T | T | T |
| 0.2500000000000000 | 0.5000000000000000 | 0.1392870000000030 | F | F | F |
| 0.2434182982047730 | 0.4984295491233937 | 0.4008330716893909 | T | T | T |
| 0.4166669999999968 | 0.5833330000000032 | 0.0514190000000028 | F | F | F |
| 0.4174870586958548 | 0.5826601486438463 | 0.3160147301793472 | T | T | T |
| 0.3333944989534317 | 0.6662793572541901 | 0.2266684666466574 | T | T | T |
| 0.5000000000000000 | 0.5000000000000000 | 0.1392870000000030 | F | F | F |
| 0.6666669999999968 | 0.5833330000000032 | 0.0514190000000028 | F | F | F |
| 0.6655991837010973 | 0.5827995918505451 | 0.3164086964406678 | T | T | T |
| 0.5832979523219564 | 0.6662356661170392 | 0.2272105543164074 | T | T | T |
| 0.7500000000000000 | 0.5000000000000000 | 0.1392870000000030 | F | F | F |
| 0.7496637634832979 | 0.4921261925362899 | 0.4006127038768454 | T | T | T |
| 0.9166669999999968 | 0.5833330000000032 | 0.0514190000000028 | F | F | F |
| 0.9172752079342885 | 0.5849713339142042 | 0.3154961028239214 | T | T | T |
| 0.8332588356685235 | 0.6666294178342582 | 0.2275012885042642 | T | T | T |
| 0.0000000000000000 | 0.7500000000000000 | 0.1392870000000030 | F | F | F |
| 0.1666669999999968 | 0.8333330000000032 | 0.0514190000000028 | F | F | F |
| 0.1654115850954909 | 0.8327052925477503 | 0.3157927095008404 | T | T | T |
| 0.0832257840714021 | 0.9160628338923118 | 0.2272254392326971 | T | T | T |
| 0.2500000000000000 | 0.7500000000000000 | 0.1392870000000030 | F | F | F |
| 0.2557165758309665 | 0.7494891952784215 | 0.4003990687922467 | T | T | T |
| 0.4166669999999968 | 0.8333330000000032 | 0.0514190000000028 | F | F | F |
| 0.4160947550709011 | 0.8328715753973199 | 0.3132090773617051 | T | T | T |
| 0.3326441991862552 | 0.9163225995931299 | 0.2266780031161701 | T | T | T |
| 0.5000000000000000 | 0.7500000000000000 | 0.1392870000000030 | F | F | F |
| 0.5015808907789534 | 0.7574034371892608 | 0.4005709588256963 | T | T | T |
| 0.6666669999999968 | 0.8333330000000032 | 0.0514190000000028 | F | F | F |
| 0.6667478543860312 | 0.8333867635777494 | 0.3135635187229582 | T | T | T |
| 0.5833948978935695 | 0.9164463992390921 | 0.2264181730540429 | T | T | T |
| 0.7500000000000000 | 0.7500000000000000 | 0.1392870000000030 | F | F | F |
| 0.7496637634832979 | 0.7575375709470080 | 0.4006127038768454 | T | T | T |

|                    |                    |                     |                     |   |   |   |
|--------------------|--------------------|---------------------|---------------------|---|---|---|
|                    | 0.9166669999999968 | 0.8333330000000032  | 0.0514190000000028  | F | F | F |
|                    | 0.9172752079342885 | 0.8323038740200843  | 0.3154961028239214  | T | T | T |
|                    | 0.8336327565699619 | 0.9163041135186489  | 0.2266738734803937  | T | T | T |
|                    | 0.0009159548183248 | 0.7504579774091553  | 0.4239918038861887  | T | T | T |
|                    | 0.4989234579863506 | 0.4994617289931753  | 0.4242921167270666  | T | T | T |
| <b>2Au/Ni(111)</b> | 1.0000000000000000 |                     |                     |   |   |   |
|                    | 8.6224000674449712 | -4.9781450000000014 | 0.0000000000000000  |   |   |   |
|                    | 0.0000000000000000 | 9.9562900000000010  | 0.0000000000000000  |   |   |   |
|                    | 0.0000000000000000 | 0.0000000000000000  | 23.1292800000000014 |   |   |   |
|                    | Ni                 | Au                  |                     |   |   |   |
|                    | 78                 | 2                   |                     |   |   |   |
|                    | Selective dynamics |                     |                     |   |   |   |
|                    | Direct             |                     |                     |   |   |   |
|                    | 0.0000000000000000 | 0.0000000000000000  | 0.1392870000000030  | F | F | F |
|                    | 0.9997155584349215 | 0.0063185713089098  | 0.4014869785995998  | T | T | T |
|                    | 0.1666669999999968 | 0.0833330000000032  | 0.0514190000000028  | F | F | F |
|                    | 0.1671188462942581 | 0.0837461840357179  | 0.3143064167281082  | T | T | T |
|                    | 0.0834562097633409 | 0.1666468261409548  | 0.2266957886291863  | T | T | T |
|                    | 0.2500000000000000 | 0.0000000000000000  | 0.1392870000000030  | F | F | F |
|                    | 0.2560143082637794 | 0.0058600210020998  | 0.4011743716361877  | T | T | T |
|                    | 0.4166669999999968 | 0.0833330000000032  | 0.0514190000000028  | F | F | F |
|                    | 0.4163091096683473 | 0.0833760286822312  | 0.3138091177027036  | T | T | T |
|                    | 0.3332698311519380 | 0.1667027267807626  | 0.2266970715939607  | T | T | T |
|                    | 0.5000000000000000 | 0.0000000000000000  | 0.1392870000000030  | F | F | F |
|                    | 0.5008500755553698 | 0.0004245377776826  | 0.4004519356915637  | T | T | T |
|                    | 0.6666669999999968 | 0.0833330000000032  | 0.0514190000000028  | F | F | F |
|                    | 0.6664446619535553 | 0.0832218309767754  | 0.3137248773864840  | T | T | T |
|                    | 0.5831530634030742 | 0.1668017751462187  | 0.2265590554115349  | T | T | T |
|                    | 0.7500000000000000 | 0.0000000000000000  | 0.1392870000000030  | F | F | F |
|                    | 0.7501590078636013 | 0.0024900110102806  | 0.4006306659318568  | T | T | T |
|                    | 0.9166669999999968 | 0.0833330000000032  | 0.0514190000000028  | F | F | F |
|                    | 0.9163045114341202 | 0.0831738964801971  | 0.3139907624835701  | T | T | T |
|                    | 0.8333817961853356 | 0.1666913980926665  | 0.2265072471573788  | T | T | T |
|                    | 0.0000000000000000 | 0.2500000000000000  | 0.1392870000000030  | F | F | F |
|                    | 0.9986764464309488 | 0.2493382232154744  | 0.4010226670662078  | T | T | T |
|                    | 0.1666669999999968 | 0.3333330000000032  | 0.0514190000000028  | F | F | F |
|                    | 0.1662596861517898 | 0.3331293430758961  | 0.3142060861172737  | T | T | T |
|                    | 0.0834562097633409 | 0.4168093836223861  | 0.2266957886291863  | T | T | T |
|                    | 0.2500000000000000 | 0.2500000000000000  | 0.1392870000000030  | F | F | F |
|                    | 0.2442591672626833 | 0.2454315300583261  | 0.4014946514529001  | T | T | T |
|                    | 0.4166669999999968 | 0.3333330000000032  | 0.0514190000000028  | F | F | F |
|                    | 0.4168136021891371 | 0.3334084920366678  | 0.3151346269582262  | T | T | T |
|                    | 0.3333610616211260 | 0.4166805308105594  | 0.2271444597171026  | T | T | T |
|                    | 0.5000000000000000 | 0.2500000000000000  | 0.1392870000000030  | F | F | F |
|                    | 0.5013447919252911 | 0.2443780305242100  | 0.4013375015067524  | T | T | T |
|                    | 0.6666669999999968 | 0.3333330000000032  | 0.0514190000000028  | F | F | F |
|                    | 0.6667319849304931 | 0.3332257677226167  | 0.3139222984066379  | T | T | T |
|                    | 0.5833204531235907 | 0.4169042204414524  | 0.2271193425360707  | T | T | T |
|                    | 0.7500000000000000 | 0.2500000000000000  | 0.1392870000000030  | F | F | F |
|                    | 0.7501590078636013 | 0.2476689968533279  | 0.4006306659318568  | T | T | T |
|                    | 0.9166669999999968 | 0.3333330000000032  | 0.0514190000000028  | F | F | F |

|                    |                    |                     |                     |   |   |   |
|--------------------|--------------------|---------------------|---------------------|---|---|---|
|                    | 0.9163045114341202 | 0.3331296149539185  | 0.3139907624835701  | T | T | T |
|                    | 0.8332365946375120 | 0.4169024989721493  | 0.2267385905220962  | T | T | T |
|                    | 0.0000000000000000 | 0.5000000000000000  | 0.1392870000000030  | F | F | F |
|                    | 0.9997155584349215 | 0.4933959871260143  | 0.4014869785995998  | T | T | T |
|                    | 0.1666669999999968 | 0.5833330000000032  | 0.0514190000000028  | F | F | F |
|                    | 0.1671188462942581 | 0.5833726622585331  | 0.3143064167281082  | T | T | T |
|                    | 0.0832070725371352 | 0.6670092016527747  | 0.2271636639220489  | T | T | T |
|                    | 0.2500000000000000 | 0.5000000000000000  | 0.1392870000000030  | F | F | F |
|                    | 0.2442591672626833 | 0.4988276372043572  | 0.4014946514529001  | T | T | T |
|                    | 0.4166669999999968 | 0.5833330000000032  | 0.0514190000000028  | F | F | F |
|                    | 0.4168136021891371 | 0.5834051101524693  | 0.3151346269582262  | T | T | T |
|                    | 0.3332698311519380 | 0.6665671043711683  | 0.2266970715939607  | T | T | T |
|                    | 0.5000000000000000 | 0.5000000000000000  | 0.1392870000000030  | F | F | F |
|                    | 0.6666669999999968 | 0.5833330000000032  | 0.0514190000000028  | F | F | F |
|                    | 0.6664454313539423 | 0.5832227156769676  | 0.3156326555333067  | T | T | T |
|                    | 0.5833204531235907 | 0.6664162326821383  | 0.2271193425360707  | T | T | T |
|                    | 0.7500000000000000 | 0.5000000000000000  | 0.1392870000000030  | F | F | F |
|                    | 0.7502104654678377 | 0.4918230827517007  | 0.4019822993725981  | T | T | T |
|                    | 0.9166669999999968 | 0.5833330000000032  | 0.0514190000000028  | F | F | F |
|                    | 0.9165600394833930 | 0.5834548202570460  | 0.3149817020545740  | T | T | T |
|                    | 0.8333422221463636 | 0.6666711110731782  | 0.2274083559549140  | T | T | T |
|                    | 0.0000000000000000 | 0.7500000000000000  | 0.1392870000000030  | F | F | F |
|                    | 0.1666669999999968 | 0.8333330000000032  | 0.0514190000000028  | F | F | F |
|                    | 0.1666091925001822 | 0.8333040962500959  | 0.3150200679198889  | T | T | T |
|                    | 0.0832070725371352 | 0.9161988708843580  | 0.2271636639220489  | T | T | T |
|                    | 0.2500000000000000 | 0.7500000000000000  | 0.1392870000000030  | F | F | F |
|                    | 0.2560143082637794 | 0.7501542872616795  | 0.4011743716361877  | T | T | T |
|                    | 0.4166669999999968 | 0.8333330000000032  | 0.0514190000000028  | F | F | F |
|                    | 0.4163091096683473 | 0.8329330809861162  | 0.3138091177027036  | T | T | T |
|                    | 0.3328720796631188 | 0.9164365398315653  | 0.2267594546936138  | T | T | T |
|                    | 0.5000000000000000 | 0.7500000000000000  | 0.1392870000000030  | F | F | F |
|                    | 0.5013447919252911 | 0.7569667614010811  | 0.4013375015067524  | T | T | T |
|                    | 0.6666669999999968 | 0.8333330000000032  | 0.0514190000000028  | F | F | F |
|                    | 0.6667319849304931 | 0.8335052172078790  | 0.3139222984066379  | T | T | T |
|                    | 0.5831530634030742 | 0.9163512882568554  | 0.2265590554115349  | T | T | T |
|                    | 0.7500000000000000 | 0.7500000000000000  | 0.1392870000000030  | F | F | F |
|                    | 0.7502104654678377 | 0.7583873827161369  | 0.4019822993725981  | T | T | T |
|                    | 0.9166669999999968 | 0.8333330000000032  | 0.0514190000000028  | F | F | F |
|                    | 0.9165600394833930 | 0.8331052192263471  | 0.3149817020545740  | T | T | T |
|                    | 0.8332365946375120 | 0.9163340956653698  | 0.2267385905220962  | T | T | T |
|                    | 0.0012236782479604 | 0.7506118391239767  | 0.4175555071928017  | T | T | T |
|                    | 0.4995048222340088 | 0.4997524111170009  | 0.4182659538189029  | T | T | T |
| <b>2Ni/Cu(111)</b> | 1.0000000000000000 |                     |                     |   |   |   |
|                    | 8.8905944857135406 | -5.1329871195825199 | -0.0000000000000010 |   |   |   |
|                    | 0.0000000000000000 | 10.2659742391650006 | 0.0000000000000010  |   |   |   |
|                    | 0.0000000000000000 | 0.0000000000000000  | 23.3821328661704015 |   |   |   |
|                    | Ni                 | Cu                  |                     |   |   |   |
|                    | 2                  | 78                  |                     |   |   |   |
|                    | Selective dynamics |                     |                     |   |   |   |
|                    | Direct             |                     |                     |   |   |   |
|                    | 0.2507590585598507 | 0.5003795292799254  | 0.3795593606484005  | T | T | T |



|                    |                    |                    |   |   |   |
|--------------------|--------------------|--------------------|---|---|---|
| 0.7498321516565767 | 0.7499160758282883 | 0.3796062667083575 | T | T | T |
| 0.0000000000000000 | 0.0000000000000000 | 0.1155258754999977 | F | F | F |
| 0.9982973732246876 | 0.9983296914565685 | 0.3833558522787541 | T | T | T |
| 0.1666666667000030 | 0.0833333332999970 | 0.0259047434999999 | F | F | F |
| 0.1665628695603374 | 0.0835288129068275 | 0.2945613206120328 | T | T | T |
| 0.0833063570312973 | 0.1667475800739311 | 0.2050644057065014 | T | T | T |
| 0.2500000000000000 | 0.0000000000000000 | 0.1155258754999977 | F | F | F |
| 0.2496663567241271 | 0.9998331783620671 | 0.3832065795812625 | T | T | T |
| 0.4166666667000030 | 0.0833333332999970 | 0.0259047434999999 | F | F | F |
| 0.4166764859478249 | 0.0833382429239080 | 0.2944931866799578 | T | T | T |
| 0.3333609481516433 | 0.1667149166901396 | 0.2050586224013529 | T | T | T |
| 0.5000000000000000 | 0.0000000000000000 | 0.1155258754999977 | F | F | F |
| 0.4999462873984299 | 0.9994130592607959 | 0.3831869773720058 | T | T | T |
| 0.6666666667000030 | 0.0833333332999970 | 0.0259047434999999 | F | F | F |
| 0.6668477733692626 | 0.0831820175577533 | 0.2944793521219538 | T | T | T |
| 0.5833400860527718 | 0.1666700430763868 | 0.2050585547294830 | T | T | T |
| 0.7500000000000000 | 0.0000000000000000 | 0.1155258754999977 | F | F | F |
| 0.7498242454607933 | 0.9979199967420698 | 0.3832369900197889 | T | T | T |
| 0.9166666667000030 | 0.0833333332999970 | 0.0259047434999999 | F | F | F |
| 0.9166761500376168 | 0.0834084361978498 | 0.2944543214214193 | T | T | T |
| 0.8333850549935846 | 0.1667138949690781 | 0.2050497269011231 | T | T | T |
| 0.0000000000000000 | 0.2500000000000000 | 0.1155258754999977 | F | F | F |
| 0.0018259109909735 | 0.2514789950279379 | 0.3832610412000506 | T | T | T |
| 0.1666666667000030 | 0.3333333332999970 | 0.0259047434999999 | F | F | F |
| 0.1668569199693337 | 0.3336829783917565 | 0.2941195060361537 | T | T | T |
| 0.0831871590489257 | 0.4165935795744602 | 0.2047119563573645 | T | T | T |
| 0.2500000000000000 | 0.2500000000000000 | 0.1155258754999977 | F | F | F |
| 0.2500267281201118 | 0.2519987799148993 | 0.3832581002837827 | T | T | T |
| 0.4166666667000030 | 0.3333333332999970 | 0.0259047434999999 | F | F | F |
| 0.4167325758454794 | 0.3336858394455220 | 0.2944206624278749 | T | T | T |
| 0.3333780330648253 | 0.4166135259808925 | 0.2047318974879531 | T | T | T |
| 0.5000000000000000 | 0.2500000000000000 | 0.1155258754999977 | F | F | F |
| 0.4999462873984299 | 0.2505332281376269 | 0.3831869773720058 | T | T | T |
| 0.6666666667000030 | 0.3333333332999970 | 0.0259047434999999 | F | F | F |
| 0.6668477733692626 | 0.3336657557114933 | 0.2944793521219538 | T | T | T |
| 0.5833073342869426 | 0.4167006316922794 | 0.2050534219286675 | T | T | T |
| 0.7500000000000000 | 0.2500000000000000 | 0.1155258754999977 | F | F | F |
| 0.7505033010124080 | 0.2502516505062005 | 0.3830825285017525 | T | T | T |
| 0.9166666667000030 | 0.3333333332999970 | 0.0259047434999999 | F | F | F |
| 0.9168764120774568 | 0.3334382059887204 | 0.2943877458301927 | T | T | T |
| 0.8333850549935846 | 0.4166711601245225 | 0.2050497269011231 | T | T | T |
| 0.0000000000000000 | 0.5000000000000000 | 0.1155258754999977 | F | F | F |
| 0.0018259109909735 | 0.5003469159630356 | 0.3832610412000506 | T | T | T |
| 0.1666666667000030 | 0.5833333332999970 | 0.0259047434999999 | F | F | F |
| 0.1668569199693337 | 0.5831739414775754 | 0.2941195060361537 | T | T | T |
| 0.0833063570312973 | 0.6665587770573822 | 0.2050644057065014 | T | T | T |
| 0.2500000000000000 | 0.5000000000000000 | 0.1155258754999977 | F | F | F |
| 0.4166666667000030 | 0.5833333332999970 | 0.0259047434999999 | F | F | F |
| 0.4165977035596526 | 0.5832988517298148 | 0.2940199983254956 | T | T | T |
| 0.3333780330648253 | 0.6667645071839416 | 0.2047318974879531 | T | T | T |
| 0.5000000000000000 | 0.5000000000000000 | 0.1155258754999977 | F | F | F |

|                    |                    |                     |                     |   |   |   |
|--------------------|--------------------|---------------------|---------------------|---|---|---|
|                    | 0.5001677263390860 | 0.5019400471531199  | 0.3833839014141347  | T | T | T |
|                    | 0.666666667000030  | 0.583333332999970   | 0.0259047434999999  | F | F | F |
|                    | 0.6665433282791042 | 0.5835700127685186  | 0.2941386855542092  | T | T | T |
|                    | 0.5830955831639528 | 0.6665477916319844  | 0.2047138955697889  | T | T | T |
|                    | 0.7500000000000000 | 0.5000000000000000  | 0.1155258754999977  | F | F | F |
|                    | 0.7498242454607933 | 0.5019042487187164  | 0.3832369900197889  | T | T | T |
|                    | 0.916666667000030  | 0.583333332999970   | 0.0259047434999999  | F | F | F |
|                    | 0.9166761500376168 | 0.5832677137397582  | 0.2944543214214193  | T | T | T |
|                    | 0.8333966248261788 | 0.6665685135153723  | 0.2047400189798338  | T | T | T |
|                    | 0.0000000000000000 | 0.7500000000000000  | 0.1155258754999977  | F | F | F |
|                    | 0.9982973732246876 | 0.7499676817681262  | 0.3833558522787541  | T | T | T |
|                    | 0.166666667000030  | 0.833333332999970   | 0.0259047434999999  | F | F | F |
|                    | 0.1665628695603374 | 0.8330340565535010  | 0.2945613206120328  | T | T | T |
|                    | 0.0832867778461477 | 0.9166433889730783  | 0.2050766591386406  | T | T | T |
|                    | 0.2500000000000000 | 0.7500000000000000  | 0.1155258754999977  | F | F | F |
|                    | 0.2500267281201118 | 0.7480279482052126  | 0.3832581002837827  | T | T | T |
|                    | 0.416666667000030  | 0.833333332999970   | 0.0259047434999999  | F | F | F |
|                    | 0.4167325758454794 | 0.8330467362999485  | 0.2944206624278749  | T | T | T |
|                    | 0.3333609481516433 | 0.9166460315615126  | 0.2050586224013529  | T | T | T |
|                    | 0.5000000000000000 | 0.7500000000000000  | 0.1155258754999977  | F | F | F |
|                    | 0.5001677263390860 | 0.7482276791859661  | 0.3833839014141347  | T | T | T |
|                    | 0.666666667000030  | 0.833333332999970   | 0.0259047434999999  | F | F | F |
|                    | 0.6665433282791042 | 0.8329733154105838  | 0.2941386855542092  | T | T | T |
|                    | 0.5833073342869426 | 0.9166067026946720  | 0.2050534219286675  | T | T | T |
|                    | 0.7500000000000000 | 0.7500000000000000  | 0.1155258754999977  | F | F | F |
|                    | 0.916666667000030  | 0.833333332999970   | 0.0259047434999999  | F | F | F |
|                    | 0.9164086969752248 | 0.8332043484376115  | 0.2941449686718016  | T | T | T |
|                    | 0.8333966248261788 | 0.9168281114108154  | 0.2047400189798338  | T | T | T |
| <b>2Pd/Cu(111)</b> | 1.0000000000000000 |                     |                     |   |   |   |
|                    | 8.8905944857135406 | -5.1329871195825199 | -0.0000000000000010 |   |   |   |
|                    | 0.0000000000000000 | 10.2659742391650006 | 0.0000000000000010  |   |   |   |
|                    | 0.0000000000000000 | 0.0000000000000000  | 23.3821328661704015 |   |   |   |
|                    | Pd                 | Cu                  |                     |   |   |   |
|                    | 2                  | 78                  |                     |   |   |   |
|                    | Selective dynamics |                     |                     |   |   |   |
|                    | Direct             |                     |                     |   |   |   |
|                    | 0.2495143164211910 | 0.4997571582105991  | 0.3868596702594189  | T | T | T |
|                    | 0.7507072329355395 | 0.7503536164677698  | 0.3867127327151820  | T | T | T |
|                    | 0.0000000000000000 | 0.0000000000000000  | 0.1155258754999977  | F | F | F |
|                    | 0.0034005587720500 | 0.0029345109008929  | 0.3835791143994385  | T | T | T |
|                    | 0.166666667000030  | 0.083333332999970   | 0.0259047434999999  | F | F | F |
|                    | 0.1667412596187887 | 0.0833535675878920  | 0.2940626307281491  | T | T | T |
|                    | 0.0833100438456000 | 0.1669169886672108  | 0.2051061865942359  | T | T | T |
|                    | 0.2500000000000000 | 0.0000000000000000  | 0.1155258754999977  | F | F | F |
|                    | 0.2505878550297993 | 0.0002939275149032  | 0.3830104827994560  | T | T | T |
|                    | 0.416666667000030  | 0.083333332999970   | 0.0259047434999999  | F | F | F |
|                    | 0.4166772470377822 | 0.0833386234688902  | 0.2940002196662519  | T | T | T |
|                    | 0.3333914321991855 | 0.1668373860586527  | 0.2048661050559204  | T | T | T |
|                    | 0.5000000000000000 | 0.0000000000000000  | 0.1155258754999977  | F | F | F |
|                    | 0.4999509547089858 | 0.0011929048844195  | 0.3831109913578672  | T | T | T |
|                    | 0.666666667000030  | 0.083333332999970   | 0.0259047434999999  | F | F | F |

|                    |                    |                    |   |   |   |
|--------------------|--------------------|--------------------|---|---|---|
| 0.6666218964625017 | 0.0833840747328694 | 0.2941371730384077 | T | T | T |
| 0.5834054295603792 | 0.1667027148301941 | 0.2047936514250637 | T | T | T |
| 0.7500000000000000 | 0.0000000000000000 | 0.1155258754999977 | F | F | F |
| 0.7498214153109970 | 0.0035168249746249 | 0.3835765185018687 | T | T | T |
| 0.9166666667000030 | 0.083333332999970  | 0.0259047434999999 | F | F | F |
| 0.9164274578841756 | 0.0829643588831388 | 0.2943988141817613 | T | T | T |
| 0.8334956216256373 | 0.1667812457006832 | 0.2050601733196800 | T | T | T |
| 0.0000000000000000 | 0.2500000000000000 | 0.1155258754999977 | F | F | F |
| 0.9967215277113937 | 0.2469791893389583 | 0.3836354756913849 | T | T | T |
| 0.1666666667000030 | 0.333333332999970  | 0.0259047434999999 | F | F | F |
| 0.1663132565693957 | 0.3327065621588048 | 0.2942909927063653 | T | T | T |
| 0.0832938029479280 | 0.4166469015239684 | 0.2048535805070983 | T | T | T |
| 0.2500000000000000 | 0.2500000000000000 | 0.1155258754999977 | F | F | F |
| 0.2501560584235492 | 0.2464349168805100 | 0.3835669492832352 | T | T | T |
| 0.4166666667000030 | 0.333333332999970  | 0.0259047434999999 | F | F | F |
| 0.4165150309370205 | 0.3333153342555590 | 0.2943256811482158 | T | T | T |
| 0.3333633500184945 | 0.4167803243573118 | 0.2049519490879916 | T | T | T |
| 0.5000000000000000 | 0.2500000000000000 | 0.1155258754999977 | F | F | F |
| 0.4999509547089858 | 0.2487580498245663 | 0.3831109913578672 | T | T | T |
| 0.6666666667000030 | 0.333333332999970  | 0.0259047434999999 | F | F | F |
| 0.6666218964625017 | 0.3332378216296163 | 0.2941371730384077 | T | T | T |
| 0.5833377224327023 | 0.4168626743618091 | 0.2050790056646576 | T | T | T |
| 0.7500000000000000 | 0.2500000000000000 | 0.1155258754999977 | F | F | F |
| 0.7493655298756750 | 0.2496827649378375 | 0.3830727460931698 | T | T | T |
| 0.9166666667000030 | 0.333333332999970  | 0.0259047434999999 | F | F | F |
| 0.9169123339994982 | 0.3334561669497518 | 0.2944470690783589 | T | T | T |
| 0.8334956216256373 | 0.4167143760249559 | 0.2050601733196800 | T | T | T |
| 0.0000000000000000 | 0.5000000000000000 | 0.1155258754999977 | F | F | F |
| 0.9967215277113937 | 0.4997423383724353 | 0.3836354756913849 | T | T | T |
| 0.1666666667000030 | 0.583333332999970  | 0.0259047434999999 | F | F | F |
| 0.1663132565693957 | 0.5836066943105749 | 0.2942909927063653 | T | T | T |
| 0.0833100438456000 | 0.6663930552783981 | 0.2051061865942359 | T | T | T |
| 0.2500000000000000 | 0.5000000000000000 | 0.1155258754999977 | F | F | F |
| 0.4166666667000030 | 0.583333332999970  | 0.0259047434999999 | F | F | F |
| 0.4175784020672779 | 0.5837892009836310 | 0.2945520003658189 | T | T | T |
| 0.3333633500184945 | 0.6665830257611987 | 0.2049519490879916 | T | T | T |
| 0.5000000000000000 | 0.5000000000000000 | 0.1155258754999977 | F | F | F |
| 0.5000951927901838 | 0.4956167471361326 | 0.3841458318771913 | T | T | T |
| 0.6666666667000030 | 0.583333332999970  | 0.0259047434999999 | F | F | F |
| 0.6663643990694084 | 0.5827220691541868 | 0.2942113416797980 | T | T | T |
| 0.5829734250091434 | 0.6664867125545726 | 0.2049749776906538 | T | T | T |
| 0.7500000000000000 | 0.5000000000000000 | 0.1155258754999977 | F | F | F |
| 0.7498214153109970 | 0.4963045903363650 | 0.3835765185018687 | T | T | T |
| 0.9166666667000030 | 0.583333332999970  | 0.0259047434999999 | F | F | F |
| 0.9164274578841756 | 0.5834630989010279 | 0.2943988141817613 | T | T | T |
| 0.8333151608406126 | 0.6665883061074780 | 0.2047943076316159 | T | T | T |
| 0.0000000000000000 | 0.7500000000000000 | 0.1155258754999977 | F | F | F |
| 0.0034005587720500 | 0.7504660478711500 | 0.3835791143994385 | T | T | T |
| 0.1666666667000030 | 0.833333332999970  | 0.0259047434999999 | F | F | F |
| 0.1667412596187887 | 0.8333876919308878 | 0.2940626307281491 | T | T | T |
| 0.0830909289922559 | 0.9165454645461324 | 0.2049409397098074 | T | T | T |

|                    |                    |                     |                     |   |   |   |
|--------------------|--------------------|---------------------|---------------------|---|---|---|
|                    | 0.2500000000000000 | 0.7500000000000000  | 0.1155258754999977  | F | F | F |
|                    | 0.2501560584235492 | 0.7537211415430463  | 0.3835669492832352  | T | T | T |
|                    | 0.4166666667000030 | 0.833333332999970   | 0.0259047434999999  | F | F | F |
|                    | 0.4165150309370205 | 0.8331996965814454  | 0.2943256811482158  | T | T | T |
|                    | 0.3333914321991855 | 0.9165540462405488  | 0.2048661050559204  | T | T | T |
|                    | 0.5000000000000000 | 0.7500000000000000  | 0.1155258754999977  | F | F | F |
|                    | 0.5000951927901838 | 0.7544784456540441  | 0.3841458318771913  | T | T | T |
|                    | 0.6666666667000030 | 0.833333332999970   | 0.0259047434999999  | F | F | F |
|                    | 0.6663643990694084 | 0.8336423298152127  | 0.2942113416797980  | T | T | T |
|                    | 0.5833377224327023 | 0.9164750481709021  | 0.2050790056646576  | T | T | T |
|                    | 0.7500000000000000 | 0.7500000000000000  | 0.1155258754999977  | F | F | F |
|                    | 0.9166666667000030 | 0.833333332999970   | 0.0259047434999999  | F | F | F |
|                    | 0.9173581286584209 | 0.8336790642792025  | 0.2940907368935726  | T | T | T |
|                    | 0.8333151608406126 | 0.9167268548331435  | 0.2047943076316159  | T | T | T |
| <b>2Pt/Cu(111)</b> | 1.0000000000000000 |                     |                     |   |   |   |
|                    | 8.8905944857135406 | -5.1329871195825199 | -0.0000000000000010 |   |   |   |
|                    | 0.0000000000000000 | 10.2659742391650006 | 0.0000000000000010  |   |   |   |
|                    | 0.0000000000000000 | 0.0000000000000000  | 23.3821328661704015 |   |   |   |
|                    | Pt                 | Cu                  |                     |   |   |   |
|                    | 2                  | 78                  |                     |   |   |   |
|                    | Selective dynamics |                     |                     |   |   |   |
|                    | Direct             |                     |                     |   |   |   |
|                    | 0.2492381937355124 | 0.4996190968677562  | 0.3846624553383337  | T | T | T |
|                    | 0.7510506486622258 | 0.7505253243311129  | 0.3846743124807038  | T | T | T |
|                    | 0.0000000000000000 | 0.0000000000000000  | 0.1155258754999977  | F | F | F |
|                    | 0.0026701171206326 | 0.0019838822535204  | 0.3843627896819809  | T | T | T |
|                    | 0.1666666667000030 | 0.083333332999970   | 0.0259047434999999  | F | F | F |
|                    | 0.1668409479931666 | 0.0835720395074534  | 0.2945732196380659  | T | T | T |
|                    | 0.0832980669190572 | 0.1667492177457857  | 0.2050392031234033  | T | T | T |
|                    | 0.2500000000000000 | 0.0000000000000000  | 0.1155258754999977  | F | F | F |
|                    | 0.2508276959789111 | 0.0004138479894555  | 0.3832303774949576  | T | T | T |
|                    | 0.4166666667000030 | 0.083333332999970   | 0.0259047434999999  | F | F | F |
|                    | 0.4166889109297660 | 0.0833444554148785  | 0.2941638458139268  | T | T | T |
|                    | 0.3333520347285616 | 0.1667245090571970  | 0.2049954413391010  | T | T | T |
|                    | 0.5000000000000000 | 0.0000000000000000  | 0.1155258754999977  | F | F | F |
|                    | 0.4998854388689705 | 0.0008863250971199  | 0.3832180571035611  | T | T | T |
|                    | 0.6666666667000030 | 0.083333332999970   | 0.0259047434999999  | F | F | F |
|                    | 0.6668552272045899 | 0.0833203327038224  | 0.2944585897024414  | T | T | T |
|                    | 0.5834453288894090 | 0.1667226644947090  | 0.2050269687660498  | T | T | T |
|                    | 0.7500000000000000 | 0.0000000000000000  | 0.1155258754999977  | F | F | F |
|                    | 0.7497564377422508 | 0.0024234300662036  | 0.3843138599456166  | T | T | T |
|                    | 0.9166666667000030 | 0.083333332999970   | 0.0259047434999999  | F | F | F |
|                    | 0.9166240634284477 | 0.0836178549615142  | 0.2945891577395771  | T | T | T |
|                    | 0.8333761831603034 | 0.1667118449010586  | 0.2050587273019407  | T | T | T |
|                    | 0.0000000000000000 | 0.2500000000000000  | 0.1155258754999977  | F | F | F |
|                    | 0.9975306597590331 | 0.2477489543868857  | 0.3842803010690730  | T | T | T |
|                    | 0.1666666667000030 | 0.333333332999970   | 0.0259047434999999  | F | F | F |
|                    | 0.1657762783134283 | 0.3315762383269344  | 0.2936446464083000  | T | T | T |
|                    | 0.0830745161218174 | 0.4165372581109131  | 0.2047520958918075  | T | T | T |
|                    | 0.2500000000000000 | 0.2500000000000000  | 0.1155258754999977  | F | F | F |
|                    | 0.2499940655831354 | 0.2475367588220257  | 0.3843395856657097  | T | T | T |

|                    |                    |                    |   |   |   |
|--------------------|--------------------|--------------------|---|---|---|
| 0.416666667000030  | 0.333333332999970  | 0.0259047434999999 | F | F | F |
| 0.4167500110546128 | 0.3331418609902871 | 0.2945136724442549 | T | T | T |
| 0.3334283158744752 | 0.4165489758928151 | 0.2047741024901187 | T | T | T |
| 0.5000000000000000 | 0.2500000000000000 | 0.1155258754999977 | F | F | F |
| 0.4998854388689705 | 0.2489991137718577 | 0.3832180571035611 | T | T | T |
| 0.666666667000030  | 0.333333332999970  | 0.0259047434999999 | F | F | F |
| 0.6668552272045899 | 0.3335348944007586 | 0.2944585897024414 | T | T | T |
| 0.5833288884201722 | 0.4167175953405020 | 0.2050430892983306 | T | T | T |
| 0.7500000000000000 | 0.2500000000000000 | 0.1155258754999977 | F | F | F |
| 0.7494403980328550 | 0.2497201990164274 | 0.3831498341068972 | T | T | T |
| 0.916666667000030  | 0.333333332999970  | 0.0259047434999999 | F | F | F |
| 0.9162573141122990 | 0.3331286570061451 | 0.2944427224861901 | T | T | T |
| 0.8333761831603034 | 0.4166643383592536 | 0.2050587273019407 | T | T | T |
| 0.0000000000000000 | 0.5000000000000000 | 0.1155258754999977 | F | F | F |
| 0.9975306597590331 | 0.4997817053721474 | 0.3842803010690730 | T | T | T |
| 0.166666667000030  | 0.583333332999970  | 0.0259047434999999 | F | F | F |
| 0.1657762783134283 | 0.5842000398864849 | 0.2936446464083000 | T | T | T |
| 0.0832980669190572 | 0.6665488492732805 | 0.2050392031234033 | T | T | T |
| 0.2500000000000000 | 0.5000000000000000 | 0.1155258754999977 | F | F | F |
| 0.416666667000030  | 0.583333332999970  | 0.0259047434999999 | F | F | F |
| 0.4179609225395691 | 0.5839804612197801 | 0.2937377426709671 | T | T | T |
| 0.3334283158744752 | 0.6668793400816689 | 0.2047741024901187 | T | T | T |
| 0.5000000000000000 | 0.5000000000000000 | 0.1155258754999977 | F | F | F |
| 0.5001169129500602 | 0.4971674031395015 | 0.3854445151009517 | T | T | T |
| 0.666666667000030  | 0.583333332999970  | 0.0259047434999999 | F | F | F |
| 0.6656931345840299 | 0.5815863745702923 | 0.2937479993234571 | T | T | T |
| 0.5829348334824764 | 0.6664674167912393 | 0.2047222628265073 | T | T | T |
| 0.7500000000000000 | 0.5000000000000000 | 0.1155258754999977 | F | F | F |
| 0.7497564377422508 | 0.4973330076760471 | 0.3843138599456166 | T | T | T |
| 0.916666667000030  | 0.583333332999970  | 0.0259047434999999 | F | F | F |
| 0.9166240634284477 | 0.5830062083669244 | 0.2945891577395771 | T | T | T |
| 0.8334350235097562 | 0.6664700723991118 | 0.2047220563467487 | T | T | T |
| 0.0000000000000000 | 0.7500000000000000 | 0.1155258754999977 | F | F | F |
| 0.0026701171206326 | 0.7506862348671122 | 0.3843627896819809 | T | T | T |
| 0.166666667000030  | 0.833333332999970  | 0.0259047434999999 | F | F | F |
| 0.1668409479931666 | 0.8332689083857046 | 0.2945732196380659 | T | T | T |
| 0.0833519485866274 | 0.9166759743433218 | 0.2049958791557433 | T | T | T |
| 0.2500000000000000 | 0.7500000000000000 | 0.1155258754999977 | F | F | F |
| 0.2499940655831354 | 0.7524573067611026 | 0.3843395856657097 | T | T | T |
| 0.416666667000030  | 0.833333332999970  | 0.0259047434999999 | F | F | F |
| 0.4167500110546128 | 0.8336081499643169 | 0.2945136724442549 | T | T | T |
| 0.3333520347285616 | 0.9166275257713805 | 0.2049954413391010 | T | T | T |
| 0.5000000000000000 | 0.7500000000000000 | 0.1155258754999977 | F | F | F |
| 0.5001169129500602 | 0.7529495098105586 | 0.3854445151009517 | T | T | T |
| 0.666666667000030  | 0.833333332999970  | 0.0259047434999999 | F | F | F |
| 0.6656931345840299 | 0.8341067599137287 | 0.2937479993234571 | T | T | T |
| 0.5833288884201722 | 0.9166112931796718 | 0.2050430892983306 | T | T | T |
| 0.7500000000000000 | 0.7500000000000000 | 0.1155258754999977 | F | F | F |
| 0.916666667000030  | 0.833333332999970  | 0.0259047434999999 | F | F | F |
| 0.9184945741281998 | 0.8342472870140955 | 0.2934929573351738 | T | T | T |
| 0.8334350235097562 | 0.9169649512106535 | 0.2047220563467487 | T | T | T |

| <b>(3) 2X-S2</b>   |                                                                                                                                                                                                                                                                                                                                                                                                                                                                                                                                                                                                                                                                                                                                                                                                                                                                                                                                                                                                                                                                                                                                                                                                                                                                                                                                                                                                                                                                                                                                                                                                                                                                                                                                                                                                                                                                                                                                                                                                                                                                                                                                                                                                                                                                                                                                                                                                                                                                                                                                                                                                                                                                                                                                                                                                                                                                                                                                                                                                                                                                                                                                                 |
|--------------------|-------------------------------------------------------------------------------------------------------------------------------------------------------------------------------------------------------------------------------------------------------------------------------------------------------------------------------------------------------------------------------------------------------------------------------------------------------------------------------------------------------------------------------------------------------------------------------------------------------------------------------------------------------------------------------------------------------------------------------------------------------------------------------------------------------------------------------------------------------------------------------------------------------------------------------------------------------------------------------------------------------------------------------------------------------------------------------------------------------------------------------------------------------------------------------------------------------------------------------------------------------------------------------------------------------------------------------------------------------------------------------------------------------------------------------------------------------------------------------------------------------------------------------------------------------------------------------------------------------------------------------------------------------------------------------------------------------------------------------------------------------------------------------------------------------------------------------------------------------------------------------------------------------------------------------------------------------------------------------------------------------------------------------------------------------------------------------------------------------------------------------------------------------------------------------------------------------------------------------------------------------------------------------------------------------------------------------------------------------------------------------------------------------------------------------------------------------------------------------------------------------------------------------------------------------------------------------------------------------------------------------------------------------------------------------------------------------------------------------------------------------------------------------------------------------------------------------------------------------------------------------------------------------------------------------------------------------------------------------------------------------------------------------------------------------------------------------------------------------------------------------------------------|
| <b>2Cu/Ni(111)</b> | 1.0000000000000000<br>8.6224000674449712 -4.9781450000000014 0.0000000000000000<br>0.0000000000000000 9.9562900000000010 0.0000000000000000<br>0.0000000000000000 0.0000000000000000 23.1292800000000014<br>Ni Cu<br>78 2<br>Selective dynamics<br>Direct<br>0.0000000000000000 0.0000000000000000 0.1392870000000030 F F F<br>0.1666669999999968 0.0833330000000032 0.0514190000000028 F F F<br>0.1664709468822853 0.0832514176420984 0.3148109531381215 T T T<br>0.0833963786408000 0.1667472429461126 0.2270130835289483 T T T<br>0.2500000000000000 0.0000000000000000 0.1392870000000030 F F F<br>0.2520414574532656 0.9997017941208619 0.4010389243898939 T T T<br>0.4166669999999968 0.0833330000000032 0.0514190000000028 F F F<br>0.4163324103648300 0.0836822142906622 0.3143288197432568 T T T<br>0.3333331278612343 0.1666524728787613 0.2266631076177539 T T T<br>0.5000000000000000 0.0000000000000000 0.1392870000000030 F F F<br>0.5000247145534926 0.0000047248833557 0.4015163065349339 T T T<br>0.6666669999999968 0.0833330000000032 0.0514190000000028 F F F<br>0.6669626800284604 0.0835046168017871 0.3143929319504122 T T T<br>0.5833101784082908 0.1667864704432468 0.2269049789076069 T T T<br>0.7500000000000000 0.0000000000000000 0.1392870000000030 F F F<br>0.7479469389419526 0.0000502842694188 0.4011308818169348 T T T<br>0.9166669999999968 0.0833330000000032 0.0514190000000028 F F F<br>0.9169504224656025 0.0830495775343976 0.3149804179625156 T T T<br>0.8333317446566131 0.1666682553433868 0.2267150662849600 T T T<br>0.0000000000000000 0.2500000000000000 0.1392870000000030 F F F<br>-0.0000502842694191 0.2520530610580473 0.4011308818169348 T T T<br>0.1666669999999968 0.3333330000000032 0.0514190000000028 F F F<br>0.1666963805999432 0.3333107653396231 0.3145751267439955 T T T<br>0.0834658862287811 0.4165418788470663 0.2268545847551247 T T T<br>0.2500000000000000 0.2500000000000000 0.1392870000000030 F F F<br>0.2497558889014308 0.2502461533818646 0.4009960362226635 T T T<br>0.4166669999999968 0.3333330000000032 0.0514190000000028 F F F<br>0.4167814790420526 0.3335526934435641 0.3148142620671902 T T T<br>0.3332782670348213 0.4166050413167459 0.2270161182589778 T T T<br>0.5000000000000000 0.2500000000000000 0.1392870000000030 F F F<br>0.5002936982819383 0.2479496729650969 0.4010534188042187 T T T<br>0.6666669999999968 0.3333330000000032 0.0514190000000028 F F F<br>0.6666402976265580 0.3333597023734421 0.3145102166114240 T T T<br>0.5833133617817357 0.4166866382182645 0.2270262397287145 T T T<br>0.7500000000000000 0.2500000000000000 0.1392870000000030 F F F<br>0.7500919599041457 0.2499080400958544 0.4011494755017564 T T T<br>0.9166669999999968 0.3333330000000032 0.0514190000000028 F F F<br>0.9164953831982128 0.3330373199715398 0.3143929319504122 T T T<br>0.8332135295567533 0.4166898215917093 0.2269049789076069 T T T<br>0.0000000000000000 0.5000000000000000 0.1392870000000030 F F F<br>-0.0000047248833557 0.4999752854465076 0.4015163065349339 T T T<br>0.1666669999999968 0.5833330000000032 0.0514190000000028 F F F |

|                    |                    |                     |                     |   |   |   |
|--------------------|--------------------|---------------------|---------------------|---|---|---|
|                    | 0.1669713431493058 | 0.5835571755362100  | 0.3144009026672495  | T | T | T |
|                    | 0.0832946129714476 | 0.6667583947225895  | 0.2268949472713599  | T | T | T |
|                    | 0.2500000000000000 | 0.5000000000000000  | 0.1392870000000030  | F | F | F |
|                    | 0.2479063121630758 | 0.5000475252279201  | 0.4011338055857941  | T | T | T |
|                    | 0.4166669999999968 | 0.5833330000000032  | 0.0514190000000028  | F | F | F |
|                    | 0.4169472497008107 | 0.5830527502991892  | 0.3149786754085754  | T | T | T |
|                    | 0.3333139786893413 | 0.6666860213106588  | 0.2267130171319106  | T | T | T |
|                    | 0.5000000000000000 | 0.5000000000000000  | 0.1392870000000030  | F | F | F |
|                    | 0.6666669999999968 | 0.5833330000000032  | 0.0514190000000028  | F | F | F |
|                    | 0.6664473065564358 | 0.5832185209579474  | 0.3148142620671902  | T | T | T |
|                    | 0.5833949586832536 | 0.6667217329651787  | 0.2270161182589778  | T | T | T |
|                    | 0.7500000000000000 | 0.5000000000000000  | 0.1392870000000030  | F | F | F |
|                    | 0.7520503270349032 | 0.4997063017180621  | 0.4010534188042187  | T | T | T |
|                    | 0.9166669999999968 | 0.5833330000000032  | 0.0514190000000028  | F | F | F |
|                    | 0.9163177857093376 | 0.5836675896351703  | 0.3143288197432568  | T | T | T |
|                    | 0.8333475271212387 | 0.6666668721387655  | 0.2266631076177539  | T | T | T |
|                    | 0.0000000000000000 | 0.7500000000000000  | 0.1392870000000030  | F | F | F |
|                    | 0.0002982058791381 | 0.7479585425467344  | 0.4010389243898939  | T | T | T |
|                    | 0.1666669999999968 | 0.8333330000000032  | 0.0514190000000028  | F | F | F |
|                    | 0.1666107632357261 | 0.8333892367642739  | 0.3144498909675029  | T | T | T |
|                    | 0.0833005783942279 | 0.9166994216057721  | 0.2269981605293766  | T | T | T |
|                    | 0.2500000000000000 | 0.7500000000000000  | 0.1392870000000030  | F | F | F |
|                    | 0.2500843243642336 | 0.7499156756357666  | 0.4011434189706967  | T | T | T |
|                    | 0.4166669999999968 | 0.8333330000000032  | 0.0514190000000028  | F | F | F |
|                    | 0.4164428244637900 | 0.8330286568506943  | 0.3144009026672495  | T | T | T |
|                    | 0.3332416052774102 | 0.9167053870285528  | 0.2268949472713599  | T | T | T |
|                    | 0.5000000000000000 | 0.7500000000000000  | 0.1392870000000030  | F | F | F |
|                    | 0.4999524747720799 | 0.7520936878369242  | 0.4011338055857941  | T | T | T |
|                    | 0.6666669999999968 | 0.8333330000000032  | 0.0514190000000028  | F | F | F |
|                    | 0.6666892346603770 | 0.8333036194000567  | 0.3145751267439955  | T | T | T |
|                    | 0.5834581211529338 | 0.9165341137712190  | 0.2268545847551247  | T | T | T |
|                    | 0.7500000000000000 | 0.7500000000000000  | 0.1392870000000030  | F | F | F |
|                    | 0.7497538466181352 | 0.7502441110985689  | 0.4009960362226635  | T | T | T |
|                    | 0.9166669999999968 | 0.8333330000000032  | 0.0514190000000028  | F | F | F |
|                    | 0.9167485823579014 | 0.8335290531177149  | 0.3148109531381215  | T | T | T |
|                    | 0.8332527570538877 | 0.9166036213591999  | 0.2270130835289483  | T | T | T |
|                    | 0.0001004920158921 | -0.0001004920158921 | 0.4063337327894365  | T | T | T |
|                    | 0.5000867634644749 | 0.4999132365355249  | 0.4063257915108534  | T | T | T |
| <b>2Ag/Ni(111)</b> | 1.0000000000000000 |                     |                     |   |   |   |
|                    | 8.6224000674449712 | -4.9781450000000014 | 0.0000000000000000  |   |   |   |
|                    | 0.0000000000000000 | 9.9562900000000010  | 0.0000000000000000  |   |   |   |
|                    | 0.0000000000000000 | 0.0000000000000000  | 23.1292800000000014 |   |   |   |
|                    | Ni                 | Ag                  |                     |   |   |   |
|                    | 78                 | 2                   |                     |   |   |   |
|                    | Selective dynamics |                     |                     |   |   |   |
|                    | Direct             |                     |                     |   |   |   |
|                    | 0.0000000000000000 | 0.0000000000000000  | 0.1392870000000030  | F | F | F |
|                    | 0.1666669999999968 | 0.0833330000000032  | 0.0514190000000028  | F | F | F |
|                    | 0.1654919809875733 | 0.0824430139675662  | 0.3153686076425534  | T | T | T |
|                    | 0.0831980867279987 | 0.1666645866555102  | 0.2272615100095693  | T | T | T |
|                    | 0.2500000000000000 | 0.0000000000000000  | 0.1392870000000030  | F | F | F |

|                     |                    |                    |   |   |   |
|---------------------|--------------------|--------------------|---|---|---|
| 0.2557397095260371  | 0.9985905112257922 | 0.4004211523930338 | T | T | T |
| 0.4166669999999968  | 0.0833330000000032 | 0.0514190000000028 | F | F | F |
| 0.4160739298824423  | 0.0838843922058497 | 0.3133199909574174 | T | T | T |
| 0.3329762038493901  | 0.1669991504205655 | 0.2267763125866274 | T | T | T |
| 0.5000000000000000  | 0.0000000000000000 | 0.1392870000000030 | F | F | F |
| 0.4999829600132309  | 0.0000181966542522 | 0.4006009196549919 | T | T | T |
| 0.6666669999999968  | 0.0833330000000032 | 0.0514190000000028 | F | F | F |
| 0.6669547702264744  | 0.0836603968940067 | 0.3137481900767684 | T | T | T |
| 0.5832965548772955  | 0.1668057616726980 | 0.2265018800067073 | T | T | T |
| 0.7500000000000000  | 0.0000000000000000 | 0.1392870000000030 | F | F | F |
| 0.7442095936852170  | 0.0006590199646622 | 0.4009074620616023 | T | T | T |
| 0.9166669999999968  | 0.0833330000000032 | 0.0514190000000028 | F | F | F |
| 0.9175404301633967  | 0.0824595698366035 | 0.3160870150688924 | T | T | T |
| 0.8334970818718604  | 0.1665029181281399 | 0.2267258370159359 | T | T | T |
| 0.0000000000000000  | 0.2500000000000000 | 0.1392870000000030 | F | F | F |
| 0.9993409800353377  | 0.2557904063147829 | 0.4009074620616023 | T | T | T |
| 0.1666669999999968  | 0.3333330000000032 | 0.0514190000000028 | F | F | F |
| 0.1666676813330445  | 0.3332952771307458 | 0.3144885809379840 | T | T | T |
| 0.0835244546754982  | 0.4164761910485231 | 0.2266578100832831 | T | T | T |
| 0.2500000000000000  | 0.2500000000000000 | 0.1392870000000030 | F | F | F |
| 0.2495594313810038  | 0.2503890203014343 | 0.4000902035094024 | T | T | T |
| 0.4166669999999968  | 0.3333330000000032 | 0.0514190000000028 | F | F | F |
| 0.4175149842634656  | 0.3344825579634750 | 0.3153572536739525 | T | T | T |
| 0.3333561261188935  | 0.4167776583352459 | 0.2272545800667020 | T | T | T |
| 0.5000000000000000  | 0.2500000000000000 | 0.1392870000000030 | F | F | F |
| 0.5013803090205803  | 0.2442337934650100 | 0.4004225427639775 | T | T | T |
| 0.6666669999999968  | 0.3333330000000032 | 0.0514190000000028 | F | F | F |
| 0.6666163126852842  | 0.3333836873147155 | 0.3138958682822745 | T | T | T |
| 0.5832149792589562  | 0.4167850207410440 | 0.2269949542782341 | T | T | T |
| 0.7500000000000000  | 0.2500000000000000 | 0.1392870000000030 | F | F | F |
| 0.7503138406323845  | 0.2496861593676157 | 0.4006553224599623 | T | T | T |
| 0.9166669999999968  | 0.3333330000000032 | 0.0514190000000028 | F | F | F |
| 0.9163396031059934  | 0.3330452297735257 | 0.3137481900767684 | T | T | T |
| 0.8331942383273022  | 0.4167034451227045 | 0.2265018800067073 | T | T | T |
| 0.0000000000000000  | 0.5000000000000000 | 0.1392870000000030 | F | F | F |
| -0.0000181966542522 | 0.5000170399867691 | 0.4006009196549919 | T | T | T |
| 0.1666669999999968  | 0.5833330000000032 | 0.0514190000000028 | F | F | F |
| 0.1669699389796783  | 0.5836545834865353 | 0.3137332643707745 | T | T | T |
| 0.0832957413053564  | 0.6668294777944189 | 0.2264945149001310 | T | T | T |
| 0.2500000000000000  | 0.5000000000000000 | 0.1392870000000030 | F | F | F |
| 0.2441774163266176  | 0.5006083442705148 | 0.4008977466699166 | T | T | T |
| 0.4166669999999968  | 0.5833330000000032 | 0.0514190000000028 | F | F | F |
| 0.4175399003954449  | 0.5824600996045557 | 0.3160818003962807 | T | T | T |
| 0.3335106865035471  | 0.6664893134964526 | 0.2267341635359659 | T | T | T |
| 0.5000000000000000  | 0.5000000000000000 | 0.1392870000000030 | F | F | F |
| 0.6666669999999968  | 0.5833330000000032 | 0.0514190000000028 | F | F | F |
| 0.6655174420365250  | 0.5824850157365343 | 0.3153572536739525 | T | T | T |
| 0.5832223416647540  | 0.6666438738811062 | 0.2272545800667020 | T | T | T |
| 0.7500000000000000  | 0.5000000000000000 | 0.1392870000000030 | F | F | F |
| 0.7557662065349899  | 0.4986196909794199 | 0.4004225427639775 | T | T | T |
| 0.9166669999999968  | 0.5833330000000032 | 0.0514190000000028 | F | F | F |



|                    |                    |                     |                     |   |   |   |
|--------------------|--------------------|---------------------|---------------------|---|---|---|
|                    | 0.9161156077941501 | 0.5839260701175573  | 0.3133199909574174  | T | T | T |
|                    | 0.8330008495794344 | 0.6670237961506097  | 0.2267763125866274  | T | T | T |
|                    | 0.0000000000000000 | 0.7500000000000000  | 0.1392870000000030  | F | F | F |
|                    | 0.0014094887742076 | 0.7442602904739630  | 0.4004211523930338  | T | T | T |
|                    | 0.1666669999999968 | 0.8333330000000032  | 0.0514190000000028  | F | F | F |
|                    | 0.1666285934342654 | 0.8333714065657346  | 0.3138882445458556  | T | T | T |
|                    | 0.0832001540567854 | 0.9167998459432147  | 0.2269820312164036  | T | T | T |
|                    | 0.2500000000000000 | 0.7500000000000000  | 0.1392870000000030  | F | F | F |
|                    | 0.2503358956421848 | 0.7496641043578153  | 0.4006534948032531  | T | T | T |
|                    | 0.4166669999999968 | 0.8333330000000032  | 0.0514190000000028  | F | F | F |
|                    | 0.4163454165134647 | 0.8330300610203218  | 0.3137332643707745  | T | T | T |
|                    | 0.3331705222055812 | 0.9167042586946438  | 0.2264945149001310  | T | T | T |
|                    | 0.5000000000000000 | 0.7500000000000000  | 0.1392870000000030  | F | F | F |
|                    | 0.4993916557294852 | 0.7558225836733824  | 0.4008977466699166  | T | T | T |
|                    | 0.6666669999999968 | 0.8333330000000032  | 0.0514190000000028  | F | F | F |
|                    | 0.6667047228692542 | 0.8333323186669555  | 0.3144885809379840  | T | T | T |
|                    | 0.5835238089514772 | 0.9164755453245019  | 0.2266578100832831  | T | T | T |
|                    | 0.7500000000000000 | 0.7500000000000000  | 0.1392870000000030  | F | F | F |
|                    | 0.7496109796985658 | 0.7504405686189962  | 0.4000902035094024  | T | T | T |
|                    | 0.9166669999999968 | 0.8333330000000032  | 0.0514190000000028  | F | F | F |
|                    | 0.9175569860324337 | 0.8345080190124270  | 0.3153686076425534  | T | T | T |
|                    | 0.8333354133444898 | 0.9168019132720011  | 0.2272615100095693  | T | T | T |
|                    | 0.0002752451639364 | -0.0002752451639364 | 0.4246423711150816  | T | T | T |
|                    | 0.5002788770633647 | 0.4997211229366357  | 0.4245530210675836  | T | T | T |
| <b>2Au/Ni(111)</b> | 1.0000000000000000 |                     |                     |   |   |   |
|                    | 8.6224000674449712 | -4.9781450000000014 | 0.0000000000000000  |   |   |   |
|                    | 0.0000000000000000 | 9.9562900000000010  | 0.0000000000000000  |   |   |   |
|                    | 0.0000000000000000 | 0.0000000000000000  | 23.1292800000000014 |   |   |   |
|                    | Ni Au              |                     |                     |   |   |   |
|                    | 78 2               |                     |                     |   |   |   |
|                    | Selective dynamics |                     |                     |   |   |   |
|                    | Direct             |                     |                     |   |   |   |
|                    | 0.0000000000000000 | 0.0000000000000000  | 0.1392870000000030  | F | F | F |
|                    | 0.1666669999999968 | 0.0833330000000032  | 0.0514190000000028  | F | F | F |
|                    | 0.1669403821752080 | 0.0832127078350756  | 0.3148844471575838  | T | T | T |
|                    | 0.0834008181267098 | 0.1666944140185209  | 0.2271764031969357  | T | T | T |
|                    | 0.2500000000000000 | 0.0000000000000000  | 0.1392870000000030  | F | F | F |
|                    | 0.2558127241207254 | 0.9985171836320919  | 0.4012656350039157  | T | T | T |
|                    | 0.4166669999999968 | 0.0833330000000032  | 0.0514190000000028  | F | F | F |
|                    | 0.4164689101840636 | 0.0835510182531769  | 0.3140168163673764  | T | T | T |
|                    | 0.3333009687899269 | 0.1666757404947928  | 0.2267708419614654  | T | T | T |
|                    | 0.5000000000000000 | 0.0000000000000000  | 0.1392870000000030  | F | F | F |
|                    | 0.5002430907706937 | -0.0002299228748868 | 0.4010706807232566  | T | T | T |
|                    | 0.6666669999999968 | 0.0833330000000032  | 0.0514190000000028  | F | F | F |
|                    | 0.6669715778763607 | 0.0834663149926912  | 0.3141403812324963  | T | T | T |
|                    | 0.5833834687862200 | 0.1667407296271841  | 0.2266728919338589  | T | T | T |
|                    | 0.7500000000000000 | 0.0000000000000000  | 0.1392870000000030  | F | F | F |
|                    | 0.7446644311945053 | 0.0007074055753193  | 0.4016157773813670  | T | T | T |
|                    | 0.9166669999999968 | 0.0833330000000032  | 0.0514190000000028  | F | F | F |
|                    | 0.9169232036483460 | 0.0830767963516540  | 0.3150964070054033  | T | T | T |
|                    | 0.8333880408451303 | 0.1666119591548700  | 0.2267359571572957  | T | T | T |

|                    |                    |                    |       |
|--------------------|--------------------|--------------------|-------|
| 0.0000000000000000 | 0.2500000000000000 | 0.1392870000000030 | F F F |
| 0.9992925944246804 | 0.2553355688054947 | 0.4016157773813670 | T T T |
| 0.1666669999999968 | 0.3333330000000032 | 0.0514190000000028 | F F F |
| 0.1666539734385929 | 0.3333368772379538 | 0.3145778703067108 | T T T |
| 0.0835556059597225 | 0.4164359613091703 | 0.2267847371913909 | T T T |
| 0.2500000000000000 | 0.2500000000000000 | 0.1392870000000030 | F F F |
| 0.2498785439090098 | 0.2501079245400158 | 0.4018655486554383 | T T T |
| 0.4166669999999968 | 0.3333330000000032 | 0.0514190000000028 | F F F |
| 0.4168073908334735 | 0.3330602000113936 | 0.3148879504401659 | T T T |
| 0.3333018330512799 | 0.4166112728721509 | 0.2271728384324307 | T T T |
| 0.5000000000000000 | 0.2500000000000000 | 0.1392870000000030 | F F F |
| 0.5015102412912175 | 0.2442096051518732 | 0.4012658984255964 | T T T |
| 0.6666669999999968 | 0.3333330000000032 | 0.0514190000000028 | F F F |
| 0.6667658348200447 | 0.3332341651799556 | 0.3141124616639524 | T T T |
| 0.5832915828476506 | 0.4167084171523491 | 0.2269975830290610 | T T T |
| 0.7500000000000000 | 0.2500000000000000 | 0.1392870000000030 | F F F |
| 0.7503334121582220 | 0.2496665878417780 | 0.4008949747306049 | T T T |
| 0.9166669999999968 | 0.3333330000000032 | 0.0514190000000028 | F F F |
| 0.9165336850073090 | 0.3330284221236395 | 0.3141403812324963 | T T T |
| 0.8332592703728163 | 0.4166165312137798 | 0.2266728919338589 | T T T |
| 0.0000000000000000 | 0.5000000000000000 | 0.1392870000000030 | F F F |
| 0.0002299228748868 | 0.4997569092293065 | 0.4010706807232566 | T T T |
| 0.1666669999999968 | 0.5833330000000032 | 0.0514190000000028 | F F F |
| 0.1669733369780717 | 0.5834754088527025 | 0.3141328451540289 | T T T |
| 0.0833798318723247 | 0.6667443587852477 | 0.2266749337338303 | T T T |
| 0.2500000000000000 | 0.5000000000000000 | 0.1392870000000030 | F F F |
| 0.2446538887488882 | 0.5006857628652640 | 0.4016127736573190 | T T T |
| 0.4166669999999968 | 0.5833330000000032 | 0.0514190000000028 | F F F |
| 0.4169250865007579 | 0.5830749134992418 | 0.3150976451848880 | T T T |
| 0.3333859251358532 | 0.6666140748641461 | 0.2267377309616490 | T T T |
| 0.5000000000000000 | 0.5000000000000000 | 0.1392870000000030 | F F F |
| 0.6666669999999968 | 0.5833330000000032 | 0.0514190000000028 | F F F |
| 0.6669397999886062 | 0.5831926091665268 | 0.3148879504401659 | T T T |
| 0.5833887271278495 | 0.6666981669487199 | 0.2271728384324307 | T T T |
| 0.7500000000000000 | 0.5000000000000000 | 0.1392870000000030 | F F F |
| 0.7557903948481264 | 0.4984897587087823 | 0.4012658984255964 | T T T |
| 0.9166669999999968 | 0.5833330000000032 | 0.0514190000000028 | F F F |
| 0.9164489817468231 | 0.5835310898159367 | 0.3140168163673764 | T T T |
| 0.8333242595052072 | 0.6666990312100732 | 0.2267708419614654 | T T T |
| 0.0000000000000000 | 0.7500000000000000 | 0.1392870000000030 | F F F |
| 0.0014828163679077 | 0.7441872758792750 | 0.4012656350039157 | T T T |
| 0.1666669999999968 | 0.8333330000000032 | 0.0514190000000028 | F F F |
| 0.1667708580768475 | 0.8332291419231528 | 0.3141198490508943 | T T T |
| 0.0832915119205771 | 0.9167084880794224 | 0.2270027137913916 | T T T |
| 0.2500000000000000 | 0.7500000000000000 | 0.1392870000000030 | F F F |
| 0.2503283455030067 | 0.7496716544969935 | 0.4008995410296275 | T T T |
| 0.4166669999999968 | 0.8333330000000032 | 0.0514190000000028 | F F F |
| 0.4165245911472976 | 0.8330266630219284 | 0.3141328451540289 | T T T |
| 0.3332556412147522 | 0.9166201681276754 | 0.2266749337338303 | T T T |
| 0.5000000000000000 | 0.7500000000000000 | 0.1392870000000030 | F F F |
| 0.4993142371347362 | 0.7553461112511115 | 0.4016127736573190 | T T T |

|                    |                     |                     |                     |   |   |   |
|--------------------|---------------------|---------------------|---------------------|---|---|---|
|                    | 0.6666669999999968  | 0.8333330000000032  | 0.0514190000000028  | F | F | F |
|                    | 0.6666631227620464  | 0.8333460265614068  | 0.3145778703067108  | T | T | T |
|                    | 0.5835640386908294  | 0.9164443940402773  | 0.2267847371913909  | T | T | T |
|                    | 0.7500000000000000  | 0.7500000000000000  | 0.1392870000000030  | F | F | F |
|                    | 0.7498920754599843  | 0.7501214560909906  | 0.4018655486554383  | T | T | T |
|                    | 0.9166669999999968  | 0.8333330000000032  | 0.0514190000000028  | F | F | F |
|                    | 0.9167872921649247  | 0.8330596178247918  | 0.3148844471575838  | T | T | T |
|                    | 0.8333055859814786  | 0.9165991818732903  | 0.2271764031969357  | T | T | T |
|                    | 0.0003737552283686  | -0.0003737552283686 | 0.4179993232980767  | T | T | T |
|                    | 0.5003639401215907  | 0.4996360598784096  | 0.4179954704798238  | T | T | T |
| <b>2Ni/Cu(111)</b> | 1.0000000000000000  |                     |                     |   |   |   |
|                    | 8.8905944857135406  | -5.1329871195825199 | -0.0000000000000010 |   |   |   |
|                    | 0.0000000000000000  | 10.2659742391650006 | 0.0000000000000010  |   |   |   |
|                    | 0.0000000000000000  | 0.0000000000000000  | 23.3821328661704015 |   |   |   |
|                    | Ni                  | Cu                  |                     |   |   |   |
|                    | 2                   | 78                  |                     |   |   |   |
|                    | Selective dynamics  |                     |                     |   |   |   |
|                    | Direct              |                     |                     |   |   |   |
|                    | 0.4997158248754447  | 0.2498579124377224  | 0.3794935656758060  | T | T | T |
|                    | 0.4997158248754447  | 0.7498579124377222  | 0.3794935656758060  | T | T | T |
|                    | 0.0000000000000000  | 0.0000000000000000  | 0.1155258754999977  | F | F | F |
|                    | 0.0001474366891749  | 0.0000737183445839  | 0.3831648703152757  | T | T | T |
|                    | 0.1666666667000030  | 0.083333332999970   | 0.0259047434999999  | F | F | F |
|                    | 0.1668645199273266  | 0.0834322599136589  | 0.2944354813639935  | T | T | T |
|                    | 0.0833740682576885  | 0.1666613379467153  | 0.2050793704716497  | T | T | T |
|                    | 0.2500000000000000  | 0.0000000000000000  | 0.1155258754999977  | F | F | F |
|                    | 0.2521535908813487  | 0.0017252463429921  | 0.3833334110549843  | T | T | T |
|                    | 0.4166666667000030  | 0.083333332999970   | 0.0259047434999999  | F | F | F |
|                    | 0.4169710424698480  | 0.0835336459755928  | 0.2941319663773826  | T | T | T |
|                    | 0.3332378037547559  | 0.1666189019273789  | 0.2047403535579549  | T | T | T |
|                    | 0.5000000000000000  | 0.0000000000000000  | 0.1155258754999977  | F | F | F |
|                    | 0.4996919788153937  | 0.9998459894077003  | 0.3833008924034275  | T | T | T |
|                    | 0.6666666667000030  | 0.083333332999970   | 0.0259047434999999  | F | F | F |
|                    | 0.6665192545300086  | 0.0832596272150035  | 0.2943001717093512  | T | T | T |
|                    | 0.5834858014807288  | 0.1665893351300133  | 0.2047250692214658  | T | T | T |
|                    | 0.7500000000000000  | 0.0000000000000000  | 0.1155258754999977  | F | F | F |
|                    | 0.7477317057288921  | 0.9981177068236152  | 0.3831822925810763  | T | T | T |
|                    | 0.9166666667000030  | 0.083333332999970   | 0.0259047434999999  | F | F | F |
|                    | 0.9163968591347306  | 0.0831994152120290  | 0.2944842436007085  | T | T | T |
|                    | 0.8332963146590435  | 0.1666481573795263  | 0.2050567719999362  | T | T | T |
|                    | 0.0000000000000000  | 0.2500000000000000  | 0.1155258754999977  | F | F | F |
|                    | -0.0000643844706047 | 0.2499678077646942  | 0.3830310379030574  | T | T | T |
|                    | 0.1666666667000030  | 0.333333332999970   | 0.0259047434999999  | F | F | F |
|                    | 0.1670329340905497  | 0.3335164669952740  | 0.2945611550484280  | T | T | T |
|                    | 0.0833740682576885  | 0.4167127304109750  | 0.2050793704716497  | T | T | T |
|                    | 0.2500000000000000  | 0.2500000000000000  | 0.1155258754999977  | F | F | F |
|                    | 0.2521535908813487  | 0.2504283445383496  | 0.3833334110549843  | T | T | T |
|                    | 0.4166666667000030  | 0.333333332999970   | 0.0259047434999999  | F | F | F |
|                    | 0.4169710424698480  | 0.3334373963942462  | 0.2941319663773826  | T | T | T |
|                    | 0.3334908100945780  | 0.4167454050972899  | 0.2050765012984110  | T | T | T |
|                    | 0.5000000000000000  | 0.2500000000000000  | 0.1155258754999977  | F | F | F |

|                    |                     |                     |                     |   |   |   |
|--------------------|---------------------|---------------------|---------------------|---|---|---|
|                    | 0.666666667000030   | 0.333333332999970   | 0.025904743499999   | F | F | F |
|                    | 0.6662445806721705  | 0.3331222902860808  | 0.2940660723807266  | T | T | T |
|                    | 0.5834858014807288  | 0.4168964664507175  | 0.2047250692214658  | T | T | T |
|                    | 0.7500000000000000  | 0.2500000000000000  | 0.1155258754999977  | F | F | F |
|                    | 0.7477317057288921  | 0.2496139989052769  | 0.3831822925810763  | T | T | T |
|                    | 0.916666667000030   | 0.333333332999970   | 0.025904743499999   | F | F | F |
|                    | 0.9163968591347306  | 0.3331974438226853  | 0.2944842436007085  | T | T | T |
|                    | 0.8332559605669173  | 0.4166279803334631  | 0.2050537993798670  | T | T | T |
|                    | 0.0000000000000000  | 0.5000000000000000  | 0.1155258754999977  | F | F | F |
|                    | 0.0001474366891749  | 0.5000737183445841  | 0.3831648703152757  | T | T | T |
|                    | 0.166666667000030   | 0.583333332999970   | 0.025904743499999   | F | F | F |
|                    | 0.1668645199273266  | 0.5834322599136588  | 0.2944354813639935  | T | T | T |
|                    | 0.0833740682576885  | 0.6666613379467153  | 0.2050793704716497  | T | T | T |
|                    | 0.2500000000000000  | 0.5000000000000000  | 0.1155258754999977  | F | F | F |
|                    | 0.2521535908813487  | 0.5017252463429921  | 0.3833334110549843  | T | T | T |
|                    | 0.416666667000030   | 0.583333332999970   | 0.025904743499999   | F | F | F |
|                    | 0.4169710424698480  | 0.5835336459755928  | 0.2941319663773826  | T | T | T |
|                    | 0.3332378037547559  | 0.6666189019273789  | 0.2047403535579549  | T | T | T |
|                    | 0.5000000000000000  | 0.5000000000000000  | 0.1155258754999977  | F | F | F |
|                    | 0.4996919788153937  | 0.4998459894077004  | 0.3833008924034275  | T | T | T |
|                    | 0.666666667000030   | 0.583333332999970   | 0.025904743499999   | F | F | F |
|                    | 0.6665192545300086  | 0.5832596272150035  | 0.2943001717093512  | T | T | T |
|                    | 0.5834858014807288  | 0.6665893351300133  | 0.2047250692214658  | T | T | T |
|                    | 0.7500000000000000  | 0.5000000000000000  | 0.1155258754999977  | F | F | F |
|                    | 0.7477317057288921  | 0.4981177068236153  | 0.3831822925810763  | T | T | T |
|                    | 0.916666667000030   | 0.583333332999970   | 0.025904743499999   | F | F | F |
|                    | 0.9163968591347306  | 0.5831994152120291  | 0.2944842436007085  | T | T | T |
|                    | 0.8332963146590435  | 0.6666481573795260  | 0.2050567719999362  | T | T | T |
|                    | 0.0000000000000000  | 0.7500000000000000  | 0.1155258754999977  | F | F | F |
|                    | -0.0000643844706047 | 0.7499678077647012  | 0.3830310379030574  | T | T | T |
|                    | 0.166666667000030   | 0.833333332999970   | 0.025904743499999   | F | F | F |
|                    | 0.1670329340905497  | 0.8335164669952740  | 0.2945611550484280  | T | T | T |
|                    | 0.0833740682576885  | 0.9167127304109819  | 0.2050793704716497  | T | T | T |
|                    | 0.2500000000000000  | 0.7500000000000000  | 0.1155258754999977  | F | F | F |
|                    | 0.2521535908813487  | 0.7504283445383496  | 0.3833334110549843  | T | T | T |
|                    | 0.416666667000030   | 0.833333332999970   | 0.025904743499999   | F | F | F |
|                    | 0.4169710424698480  | 0.8334373963942461  | 0.2941319663773826  | T | T | T |
|                    | 0.3334908100945780  | 0.9167454050972900  | 0.2050765012984110  | T | T | T |
|                    | 0.5000000000000000  | 0.7500000000000000  | 0.1155258754999977  | F | F | F |
|                    | 0.666666667000030   | 0.833333332999970   | 0.025904743499999   | F | F | F |
|                    | 0.6662445806721705  | 0.8331222902860808  | 0.2940660723807266  | T | T | T |
|                    | 0.5834858014807288  | 0.9168964664507174  | 0.2047250692214658  | T | T | T |
|                    | 0.7500000000000000  | 0.7500000000000000  | 0.1155258754999977  | F | F | F |
|                    | 0.7477317057288921  | 0.7496139989052768  | 0.3831822925810763  | T | T | T |
|                    | 0.916666667000030   | 0.833333332999970   | 0.025904743499999   | F | F | F |
|                    | 0.9163968591347306  | 0.8331974438226855  | 0.2944842436007085  | T | T | T |
|                    | 0.8332559605669173  | 0.9166279803334630  | 0.2050537993798670  | T | T | T |
| <b>2Pd/Cu(111)</b> | 1.000000000000000   |                     |                     |   |   |   |
|                    | 8.8905944857135406  | -5.1329871195825199 | -0.0000000000000010 |   |   |   |
|                    | 0.0000000000000000  | 10.2659742391650006 | 0.0000000000000010  |   |   |   |
|                    | 0.0000000000000000  | 0.0000000000000000  | 23.3821328661704015 |   |   |   |

Pd Cu  
2 78  
Selective dynamics  
Direct

|                    |                    |                    |   |   |   |
|--------------------|--------------------|--------------------|---|---|---|
| 0.4999183260040048 | 0.2499591630020059 | 0.3865557557270350 | T | T | T |
| 0.4999183260040048 | 0.7499591630020058 | 0.3865557557270350 | T | T | T |
| 0.0000000000000000 | 0.0000000000000000 | 0.1155258754999977 | F | F | F |
| 0.0000999937193728 | 0.0000499968596829 | 0.3831449606666890 | T | T | T |
| 0.1666666667000030 | 0.083333332999970  | 0.0259047434999999 | F | F | F |
| 0.1668475510628119 | 0.0834237754814051 | 0.2942821055842286 | T | T | T |
| 0.0833503219899182 | 0.1666128943488833 | 0.2049156495439296 | T | T | T |
| 0.2500000000000000 | 0.0000000000000000 | 0.1155258754999977 | F | F | F |
| 0.2460952130588883 | 0.9967215050624213 | 0.3835963132219139 | T | T | T |
| 0.4166666667000030 | 0.083333332999970  | 0.0259047434999999 | F | F | F |
| 0.4163012189095653 | 0.0827793707159929 | 0.2941947838953959 | T | T | T |
| 0.3332835632525736 | 0.1666417816762912 | 0.2047626734614772 | T | T | T |
| 0.5000000000000000 | 0.0000000000000000 | 0.1155258754999977 | F | F | F |
| 0.4997595185697331 | 0.9998797592848631 | 0.3840929361182922 | T | T | T |
| 0.6666666667000030 | 0.083333332999970  | 0.0259047434999999 | F | F | F |
| 0.6665063062668154 | 0.0832531530834032 | 0.2946973702278539 | T | T | T |
| 0.5834537062992569 | 0.1665670811933659 | 0.2049205119579500 | T | T | T |
| 0.7500000000000000 | 0.0000000000000000 | 0.1155258754999977 | F | F | F |
| 0.7539701134045333 | 0.0032530136737407 | 0.3836316340123037 | T | T | T |
| 0.9166666667000030 | 0.083333332999970  | 0.0259047434999999 | F | F | F |
| 0.9167565538732504 | 0.0833456960225736 | 0.2941775675669597 | T | T | T |
| 0.8330593009051577 | 0.1665296505025833 | 0.2050712495936068 | T | T | T |
| 0.0000000000000000 | 0.2500000000000000 | 0.1155258754999977 | F | F | F |
| 0.0000788245200769 | 0.2500394122600420 | 0.3829907079440334 | T | T | T |
| 0.1666666667000030 | 0.333333332999970  | 0.0259047434999999 | F | F | F |
| 0.1666447130204523 | 0.3333223564602217 | 0.2940995765189647 | T | T | T |
| 0.0833503219899182 | 0.4167374277410509 | 0.2049156495439296 | T | T | T |
| 0.2500000000000000 | 0.2500000000000000 | 0.1155258754999977 | F | F | F |
| 0.2460952130588883 | 0.2493737079964669 | 0.3835963132219139 | T | T | T |
| 0.4166666667000030 | 0.333333332999970  | 0.0259047434999999 | F | F | F |
| 0.4163012189095653 | 0.3335218480935635 | 0.2941947838953959 | T | T | T |
| 0.3336065492747330 | 0.4168032746873709 | 0.2051337164028840 | T | T | T |
| 0.5000000000000000 | 0.2500000000000000 | 0.1155258754999977 | F | F | F |
| 0.6666666667000030 | 0.333333332999970  | 0.0259047434999999 | F | F | F |
| 0.6673794048148052 | 0.3336897023574017 | 0.2942538500943039 | T | T | T |
| 0.5834537062992569 | 0.4168866252058998 | 0.2049205119579500 | T | T | T |
| 0.7500000000000000 | 0.2500000000000000 | 0.1155258754999977 | F | F | F |
| 0.7539701134045333 | 0.2507170997307926 | 0.3836316340123037 | T | T | T |
| 0.9166666667000030 | 0.333333332999970  | 0.0259047434999999 | F | F | F |
| 0.9167565538732504 | 0.3334108577506680 | 0.2941775675669597 | T | T | T |
| 0.8330407602047123 | 0.4165203801523570 | 0.2050145408003460 | T | T | T |
| 0.0000000000000000 | 0.5000000000000000 | 0.1155258754999977 | F | F | F |
| 0.0000999937193728 | 0.5000499968596829 | 0.3831449606666890 | T | T | T |
| 0.1666666667000030 | 0.583333332999970  | 0.0259047434999999 | F | F | F |
| 0.1668475510628119 | 0.5834237754814050 | 0.2942821055842286 | T | T | T |
| 0.0833503219899182 | 0.6666128943488835 | 0.2049156495439296 | T | T | T |
| 0.2500000000000000 | 0.5000000000000000 | 0.1155258754999977 | F | F | F |

|                    |                    |                     |                     |   |   |   |
|--------------------|--------------------|---------------------|---------------------|---|---|---|
|                    | 0.2460952130588883 | 0.4967215050624214  | 0.3835963132219139  | T | T | T |
|                    | 0.4166666667000030 | 0.5833333332999970  | 0.0259047434999999  | F | F | F |
|                    | 0.4163012189095653 | 0.5827793707159931  | 0.2941947838953959  | T | T | T |
|                    | 0.3332835632525736 | 0.6666417816762912  | 0.2047626734614772  | T | T | T |
|                    | 0.5000000000000000 | 0.5000000000000000  | 0.1155258754999977  | F | F | F |
|                    | 0.4997595185697331 | 0.4998797592848630  | 0.3840929361182922  | T | T | T |
|                    | 0.6666666667000030 | 0.5833333332999970  | 0.0259047434999999  | F | F | F |
|                    | 0.6665063062668154 | 0.5832531530834033  | 0.2946973702278539  | T | T | T |
|                    | 0.5834537062992569 | 0.6665670811933659  | 0.2049205119579500  | T | T | T |
|                    | 0.7500000000000000 | 0.5000000000000000  | 0.1155258754999977  | F | F | F |
|                    | 0.7539701134045333 | 0.5032530136737406  | 0.3836316340123037  | T | T | T |
|                    | 0.9166666667000030 | 0.5833333332999970  | 0.0259047434999999  | F | F | F |
|                    | 0.9167565538732504 | 0.5833456960225736  | 0.2941775675669597  | T | T | T |
|                    | 0.8330593009051577 | 0.6665296505025833  | 0.2050712495936068  | T | T | T |
|                    | 0.0000000000000000 | 0.7500000000000000  | 0.1155258754999977  | F | F | F |
|                    | 0.0000788245200769 | 0.7500394122600420  | 0.3829907079440334  | T | T | T |
|                    | 0.1666666667000030 | 0.8333333332999970  | 0.0259047434999999  | F | F | F |
|                    | 0.1666447130204523 | 0.8333223564602218  | 0.2940995765189647  | T | T | T |
|                    | 0.0833503219899182 | 0.9167374277410509  | 0.2049156495439296  | T | T | T |
|                    | 0.2500000000000000 | 0.7500000000000000  | 0.1155258754999977  | F | F | F |
|                    | 0.2460952130588883 | 0.7493737079964670  | 0.3835963132219139  | T | T | T |
|                    | 0.4166666667000030 | 0.8333333332999970  | 0.0259047434999999  | F | F | F |
|                    | 0.4163012189095653 | 0.8335218480935636  | 0.2941947838953959  | T | T | T |
|                    | 0.3336065492747330 | 0.9168032746873709  | 0.2051337164028840  | T | T | T |
|                    | 0.5000000000000000 | 0.7500000000000000  | 0.1155258754999977  | F | F | F |
|                    | 0.6666666667000030 | 0.8333333332999970  | 0.0259047434999999  | F | F | F |
|                    | 0.6673794048148052 | 0.8336897023574017  | 0.2942538500943039  | T | T | T |
|                    | 0.5834537062992569 | 0.9168866252058998  | 0.2049205119579500  | T | T | T |
|                    | 0.7500000000000000 | 0.7500000000000000  | 0.1155258754999977  | F | F | F |
|                    | 0.7539701134045333 | 0.7507170997307926  | 0.3836316340123037  | T | T | T |
|                    | 0.9166666667000030 | 0.8333333332999970  | 0.0259047434999999  | F | F | F |
|                    | 0.9167565538732504 | 0.8334108577506680  | 0.2941775675669597  | T | T | T |
|                    | 0.8330407602047123 | 0.9165203801523572  | 0.2050145408003460  | T | T | T |
| <b>2Pt/Cu(111)</b> | 1.0000000000000000 |                     |                     |   |   |   |
|                    | 8.8905944857135406 | -5.1329871195825199 | -0.0000000000000010 |   |   |   |
|                    | 0.0000000000000000 | 10.2659742391650006 | 0.0000000000000010  |   |   |   |
|                    | 0.0000000000000000 | 0.0000000000000000  | 23.3821328661704015 |   |   |   |
|                    | Pt                 | Cu                  |                     |   |   |   |
|                    | 2                  | 78                  |                     |   |   |   |
|                    | Selective dynamics |                     |                     |   |   |   |
|                    | Direct             |                     |                     |   |   |   |
|                    | 0.5000931582927182 | 0.2500465791463591  | 0.3844573389170169  | T | T | T |
|                    | 0.5000931582927182 | 0.7500465791463592  | 0.3844573389170169  | T | T | T |
|                    | 0.0000000000000000 | 0.0000000000000000  | 0.1155258754999977  | F | F | F |
|                    | 0.0002918048126107 | 0.0001459024063018  | 0.3832246771642987  | T | T | T |
|                    | 0.1666666667000030 | 0.0833333332999970  | 0.0259047434999999  | F | F | F |
|                    | 0.1662889300094055 | 0.0831444649546948  | 0.2943111057105234  | T | T | T |
|                    | 0.0832513273935476 | 0.1666323432987435  | 0.2050248980917876  | T | T | T |
|                    | 0.2500000000000000 | 0.0000000000000000  | 0.1155258754999977  | F | F | F |
|                    | 0.2471918858221159 | 0.9977600960349190  | 0.3843390948757227  | T | T | T |
|                    | 0.4166666667000030 | 0.0833333332999970  | 0.0259047434999999  | F | F | F |

|                    |                    |                    |   |   |   |
|--------------------|--------------------|--------------------|---|---|---|
| 0.4159150421705126 | 0.0817177449626379 | 0.2936915806832167 | T | T | T |
| 0.3330411787963337 | 0.1665205894481713 | 0.2046969470161028 | T | T | T |
| 0.5000000000000000 | 0.0000000000000000 | 0.1155258754999977 | F | F | F |
| 0.4996374619685569 | 0.9998187309842786 | 0.3856561435170248 | T | T | T |
| 0.666666667000030  | 0.083333332999970  | 0.0259047434999999 | F | F | F |
| 0.6669881883977408 | 0.0834940941488696 | 0.2946011990300733 | T | T | T |
| 0.5835149346652573 | 0.1665155939528348 | 0.2047578050800088 | T | T | T |
| 0.7500000000000000 | 0.0000000000000000 | 0.1155258754999977 | F | F | F |
| 0.7530027483041202 | 0.0022881482969732 | 0.3842949538813686 | T | T | T |
| 0.916666667000030  | 0.083333332999970  | 0.0259047434999999 | F | F | F |
| 0.9166056724570019 | 0.0834546450476833 | 0.2944692799132238 | T | T | T |
| 0.8332488909368445 | 0.1666244455184266 | 0.2050661998836094 | T | T | T |
| 0.0000000000000000 | 0.2500000000000000 | 0.1155258754999977 | F | F | F |
| 0.0000492938659915 | 0.2500246469329921 | 0.3831230581045937 | T | T | T |
| 0.166666667000030  | 0.333333332999970  | 0.0259047434999999 | F | F | F |
| 0.1665487856963792 | 0.3332743927981816 | 0.2945601364932164 | T | T | T |
| 0.0832513273935476 | 0.4166189841948130 | 0.2050248980917876 | T | T | T |
| 0.2500000000000000 | 0.2500000000000000 | 0.1155258754999977 | F | F | F |
| 0.2471918858221159 | 0.2494317897871969 | 0.3843390948757227 | T | T | T |
| 0.416666667000030  | 0.333333332999970  | 0.0259047434999999 | F | F | F |
| 0.4159150421705126 | 0.3341972971078587 | 0.2936915806832167 | T | T | T |
| 0.3333958631123921 | 0.4166979316062004 | 0.2050034106130608 | T | T | T |
| 0.5000000000000000 | 0.2500000000000000 | 0.1155258754999977 | F | F | F |
| 0.666666667000030  | 0.333333332999970  | 0.0259047434999999 | F | F | F |
| 0.6682993108655508 | 0.3341496553827710 | 0.2935946480593849 | T | T | T |
| 0.5835149346652573 | 0.4169993408124315 | 0.2047578050800088 | T | T | T |
| 0.7500000000000000 | 0.2500000000000000 | 0.1155258754999977 | F | F | F |
| 0.7530027483041202 | 0.2507146000071470 | 0.3842949538813686 | T | T | T |
| 0.916666667000030  | 0.333333332999970  | 0.0259047434999999 | F | F | F |
| 0.9166056724570019 | 0.3331510273093097 | 0.2944692799132238 | T | T | T |
| 0.8332317785772224 | 0.4166158893386121 | 0.2050209239452597 | T | T | T |
| 0.0000000000000000 | 0.5000000000000000 | 0.1155258754999977 | F | F | F |
| 0.0002918048126107 | 0.5001459024063019 | 0.3832246771642987 | T | T | T |
| 0.166666667000030  | 0.583333332999970  | 0.0259047434999999 | F | F | F |
| 0.1662889300094055 | 0.5831444649546946 | 0.2943111057105234 | T | T | T |
| 0.0832513273935476 | 0.6666323432987437 | 0.2050248980917876 | T | T | T |
| 0.2500000000000000 | 0.5000000000000000 | 0.1155258754999977 | F | F | F |
| 0.2471918858221159 | 0.4977600960349191 | 0.3843390948757227 | T | T | T |
| 0.416666667000030  | 0.583333332999970  | 0.0259047434999999 | F | F | F |
| 0.4159150421705126 | 0.5817177449626378 | 0.2936915806832167 | T | T | T |
| 0.3330411787963337 | 0.6665205894481711 | 0.2046969470161028 | T | T | T |
| 0.5000000000000000 | 0.5000000000000000 | 0.1155258754999977 | F | F | F |
| 0.4996374619685569 | 0.4998187309842785 | 0.3856561435170248 | T | T | T |
| 0.666666667000030  | 0.583333332999970  | 0.0259047434999999 | F | F | F |
| 0.6669881883977408 | 0.5834940941488695 | 0.2946011990300733 | T | T | T |
| 0.5835149346652573 | 0.6665155939528349 | 0.2047578050800088 | T | T | T |
| 0.7500000000000000 | 0.5000000000000000 | 0.1155258754999977 | F | F | F |
| 0.7530027483041202 | 0.5022881482969732 | 0.3842949538813686 | T | T | T |
| 0.916666667000030  | 0.583333332999970  | 0.0259047434999999 | F | F | F |
| 0.9166056724570019 | 0.5834546450476834 | 0.2944692799132238 | T | T | T |
| 0.8332488909368445 | 0.6666244455184266 | 0.2050661998836094 | T | T | T |

|                    |                                                                |
|--------------------|----------------------------------------------------------------|
|                    | 0.0000000000000000 0.7500000000000000 0.1155258754999977 F F F |
|                    | 0.0000492938659915 0.7500246469329922 0.3831230581045937 T T T |
|                    | 0.1666666667000030 0.8333333332999970 0.0259047434999999 F F F |
|                    | 0.1665487856963792 0.8332743927981816 0.2945601364932164 T T T |
|                    | 0.0832513273935476 0.9166189841948130 0.2050248980917876 T T T |
|                    | 0.2500000000000000 0.7500000000000000 0.1155258754999977 F F F |
|                    | 0.2471918858221159 0.7494317897871970 0.3843390948757227 T T T |
|                    | 0.4166666667000030 0.8333333332999970 0.0259047434999999 F F F |
|                    | 0.4159150421705126 0.8341972971078587 0.2936915806832167 T T T |
|                    | 0.3333958631123921 0.9166979316062004 0.2050034106130608 T T T |
|                    | 0.5000000000000000 0.7500000000000000 0.1155258754999977 F F F |
|                    | 0.6666666667000030 0.8333333332999970 0.0259047434999999 F F F |
|                    | 0.6682993108655508 0.8341496553827710 0.2935946480593849 T T T |
|                    | 0.5835149346652573 0.9169993408124315 0.2047578050800088 T T T |
|                    | 0.7500000000000000 0.7500000000000000 0.1155258754999977 F F F |
|                    | 0.7530027483041202 0.7507146000071471 0.3842949538813686 T T T |
|                    | 0.9166666667000030 0.8333333332999970 0.0259047434999999 F F F |
|                    | 0.9166056724570019 0.8331510273093099 0.2944692799132238 T T T |
|                    | 0.8332317785772224 0.9166158893386122 0.2050209239452597 T T T |
| <b>(4) 3X-S1</b>   |                                                                |
| <b>3Cu/Ni(111)</b> | 1.0000000000000000                                             |
|                    | 8.6224000674449712 -4.9781450000000014 0.0000000000000000      |
|                    | 0.0000000000000000 9.9562900000000010 0.0000000000000000       |
|                    | 0.0000000000000000 0.0000000000000000 23.1292800000000014      |
|                    | Ni Cu                                                          |
|                    | 77 3                                                           |
|                    | Selective dynamics                                             |
|                    | Direct                                                         |
|                    | 0.0000000000000000 0.0000000000000000 0.1392870000000030 F F F |
|                    | 0.0002990646812577 0.0021360572210298 0.4009736936569226 T T T |
|                    | 0.1666669999999968 0.0833330000000032 0.0514190000000028 F F F |
|                    | 0.1671277651889511 0.0835398167691039 0.3142886299411884 T T T |
|                    | 0.0833761896079608 0.1667128118852474 0.2267833485002839 T T T |
|                    | 0.2500000000000000 0.0000000000000000 0.1392870000000030 F F F |
|                    | 0.2517832630144241 0.0023121079131982 0.4009397958845042 T T T |
|                    | 0.4166669999999968 0.0833330000000032 0.0514190000000028 F F F |
|                    | 0.4165254555310582 0.0834671895552148 0.3141658594032464 T T T |
|                    | 0.3333208493697271 0.1665966493772331 0.2266338087125987 T T T |
|                    | 0.5000000000000000 0.0000000000000000 0.1392870000000030 F F F |
|                    | 0.4976010511428939 0.9979736187703523 0.4009031381860453 T T T |
|                    | 0.6666669999999968 0.0833330000000032 0.0514190000000028 F F F |
|                    | 0.6667181219175191 0.0837270681005933 0.3148041519472571 T T T |
|                    | 0.5836158096434190 0.1670497897915197 0.2270211297499145 T T T |
|                    | 0.7500000000000000 0.0000000000000000 0.1392870000000030 F F F |
|                    | 0.7504037705250184 0.9981200019996166 0.4008633675011666 T T T |
|                    | 0.9166669999999968 0.0833330000000032 0.0514190000000028 F F F |
|                    | 0.9162844319987755 0.0832450693135272 0.3142619258474397 T T T |
|                    | 0.8333162831967584 0.1666723583647922 0.2269889376761540 T T T |
|                    | 0.0000000000000000 0.2500000000000000 0.1392870000000030 F F F |
|                    | 0.0018005478290561 0.2495922305950415 0.4010709815598830 T T T |
|                    | 0.1666669999999968 0.3333330000000032 0.0514190000000028 F F F |



|                    |                    |                    |   |   |   |
|--------------------|--------------------|--------------------|---|---|---|
| 0.1665978348746577 | 0.3334165613081979 | 0.3141713145308742 | T | T | T |
| 0.0834859887504038 | 0.4167653109319502 | 0.2266926925994213 | T | T | T |
| 0.2500000000000000 | 0.2500000000000000 | 0.1392870000000030 | F | F | F |
| 0.2478845573661346 | 0.2483158123346598 | 0.4010706371731416 | T | T | T |
| 0.4166669999999968 | 0.3333330000000032 | 0.0514190000000028 | F | F | F |
| 0.4171952968952084 | 0.3336455434699630 | 0.3146919229814102 | T | T | T |
| 0.3333220372862229 | 0.4166108222144871 | 0.2269695674455647 | T | T | T |
| 0.5000000000000000 | 0.2500000000000000 | 0.1392870000000030 | F | F | F |
| 0.4985529295826723 | 0.2482994927369120 | 0.4010435264405388 | T | T | T |
| 0.6666669999999968 | 0.3333330000000032 | 0.0514190000000028 | F | F | F |
| 0.6670630525878849 | 0.3333524157474841 | 0.3148866536806807 | T | T | T |
| 0.5833588260379727 | 0.4166940685080860 | 0.2269159246419150 | T | T | T |
| 0.7500000000000000 | 0.2500000000000000 | 0.1392870000000030 | F | F | F |
| 0.9166669999999968 | 0.3333330000000032 | 0.0514190000000028 | F | F | F |
| 0.9159551306713638 | 0.3331939225103895 | 0.3146722740003582 | T | T | T |
| 0.8330773122547654 | 0.4164294674065303 | 0.2269242557106992 | T | T | T |
| 0.0000000000000000 | 0.5000000000000000 | 0.1392870000000030 | F | F | F |
| 0.0015291295874533 | 0.5002074549841993 | 0.4009603574313161 | T | T | T |
| 0.1666669999999968 | 0.5833330000000032 | 0.0514190000000028 | F | F | F |
| 0.1669656253882934 | 0.5834607577545441 | 0.3141571935258369 | T | T | T |
| 0.0832838636174742 | 0.6668872253881091 | 0.2270128286640656 | T | T | T |
| 0.2500000000000000 | 0.5000000000000000 | 0.1392870000000030 | F | F | F |
| 0.2476569159337814 | 0.4994832735341959 | 0.4009178170344612 | T | T | T |
| 0.4166669999999968 | 0.5833330000000032 | 0.0514190000000028 | F | F | F |
| 0.4169141572537498 | 0.5831969802069281 | 0.3148519730784685 | T | T | T |
| 0.3332732380518948 | 0.6666673806944559 | 0.2267017805469180 | T | T | T |
| 0.5000000000000000 | 0.5000000000000000 | 0.1392870000000030 | F | F | F |
| 0.6666669999999968 | 0.5833330000000032 | 0.0514190000000028 | F | F | F |
| 0.6663883365918437 | 0.5829180230894480 | 0.3148034133773265 | T | T | T |
| 0.5834684738153584 | 0.6666110502475462 | 0.2269690032009777 | T | T | T |
| 0.7500000000000000 | 0.5000000000000000 | 0.1392870000000030 | F | F | F |
| 0.7500268384512765 | 0.5000502516569227 | 0.4010710431105693 | T | T | T |
| 0.9166669999999968 | 0.5833330000000032 | 0.0514190000000028 | F | F | F |
| 0.9167662539434360 | 0.5840399339447373 | 0.3147738085442313 | T | T | T |
| 0.8334291700552043 | 0.6666886532640319 | 0.2268360614048390 | T | T | T |
| 0.0000000000000000 | 0.7500000000000000 | 0.1392870000000030 | F | F | F |
| 0.1666669999999968 | 0.8333330000000032 | 0.0514190000000028 | F | F | F |
| 0.1665941914031563 | 0.8332500501731275 | 0.3149104194148862 | T | T | T |
| 0.0834895189205440 | 0.9164520957317421 | 0.2270160675006494 | T | T | T |
| 0.2500000000000000 | 0.7500000000000000 | 0.1392870000000030 | F | F | F |
| 0.2520032597128861 | 0.7495428103400954 | 0.4009861400087189 | T | T | T |
| 0.4166669999999968 | 0.8333330000000032 | 0.0514190000000028 | F | F | F |
| 0.4165502698471357 | 0.8329651450559084 | 0.3140161850912619 | T | T | T |
| 0.3336246144745161 | 0.9168584404496798 | 0.2267472029215227 | T | T | T |
| 0.5000000000000000 | 0.7500000000000000 | 0.1392870000000030 | F | F | F |
| 0.5003519928444575 | 0.7523756001615141 | 0.4009502254723216 | T | T | T |
| 0.6666669999999968 | 0.8333330000000032 | 0.0514190000000028 | F | F | F |
| 0.6666859186043368 | 0.8333140363708864 | 0.3139487144800839 | T | T | T |
| 0.5833832135515848 | 0.9164262738545972 | 0.2267035929150225 | T | T | T |
| 0.7500000000000000 | 0.7500000000000000 | 0.1392870000000030 | F | F | F |
| 0.7496690570837288 | 0.7514622092188503 | 0.4009159335806274 | T | T | T |

|                    |                    |                     |                     |   |   |   |
|--------------------|--------------------|---------------------|---------------------|---|---|---|
|                    | 0.916666999999968  | 0.833333000000032   | 0.051419000000028   | F | F | F |
|                    | 0.9166836381490668 | 0.8326856864945569  | 0.3146108789565005  | T | T | T |
|                    | 0.8333302417872019 | 0.9167019345764089  | 0.2266577116841475  | T | T | T |
|                    | 0.7500319150301635 | 0.2492273167705150  | 0.4063283142521499  | T | T | T |
|                    | 0.0006837330670493 | 0.7508180554972128  | 0.4062818691951051  | T | T | T |
|                    | 0.4992449832292323 | 0.4999460571779366  | 0.4062750811383680  | T | T | T |
| <b>3Ag/Ni(111)</b> | 1.000000000000000  |                     |                     |   |   |   |
|                    | 8.6224000674449712 | -4.9781450000000014 | 0.0000000000000000  |   |   |   |
|                    | 0.0000000000000000 | 9.9562900000000010  | 0.0000000000000000  |   |   |   |
|                    | 0.0000000000000000 | 0.0000000000000000  | 23.1292800000000014 |   |   |   |
|                    | Ni                 | Ag                  |                     |   |   |   |
|                    | 77                 | 3                   |                     |   |   |   |
|                    | Selective dynamics |                     |                     |   |   |   |
|                    | Direct             |                     |                     |   |   |   |
|                    | 0.0000000000000000 | 0.0000000000000000  | 0.1392870000000030  | F | F | F |
|                    | 0.0000730000000004 | 0.0021509999999978  | 0.4009849999999986  | T | T | T |
|                    | 0.1666669999999968 | 0.0833330000000032  | 0.0514190000000028  | F | F | F |
|                    | 0.1671630000000022 | 0.0833900000000014  | 0.3143540000000016  | T | T | T |
|                    | 0.0834520000000012 | 0.1667670000000001  | 0.2268660000000011  | T | T | T |
|                    | 0.2500000000000000 | 0.0000000000000000  | 0.1392870000000030  | F | F | F |
|                    | 0.2520159999999976 | 0.0024609999999967  | 0.4009980000000013  | T | T | T |
|                    | 0.4166669999999968 | 0.0833330000000032  | 0.0514190000000028  | F | F | F |
|                    | 0.4163789999999992 | 0.0833769999999987  | 0.3142020000000016  | T | T | T |
|                    | 0.3333050000000028 | 0.1666030000000021  | 0.2267000000000010  | T | T | T |
|                    | 0.5000000000000000 | 0.0000000000000000  | 0.1392870000000030  | F | F | F |
|                    | 0.4996780000000030 | 0.9998390000000015  | 0.4012740000000008  | T | T | T |
|                    | 0.6666669999999968 | 0.0833330000000032  | 0.0514190000000028  | F | F | F |
|                    | 0.6665309999999991 | 0.0832649999999973  | 0.3145680000000013  | T | T | T |
|                    | 0.5834320000000019 | 0.1669020000000003  | 0.2268600000000021  | T | T | T |
|                    | 0.7500000000000000 | 0.0000000000000000  | 0.1392870000000030  | F | F | F |
|                    | 0.7500100000000032 | 0.0001519999999999  | 0.4011110000000002  | T | T | T |
|                    | 0.9166669999999968 | 0.0833330000000032  | 0.0514190000000028  | F | F | F |
|                    | 0.9162940000000006 | 0.0830559999999991  | 0.3143389999999968  | T | T | T |
|                    | 0.8333200000000005 | 0.1666600000000003  | 0.2268380000000008  | T | T | T |
|                    | 0.0000000000000000 | 0.2500000000000000  | 0.1392870000000030  | F | F | F |
|                    | 0.9995159999999998 | 0.2497579999999999  | 0.4012379999999993  | T | T | T |
|                    | 0.1666669999999968 | 0.3333330000000032  | 0.0514190000000028  | F | F | F |
|                    | 0.1666379999999990 | 0.3333190000000030  | 0.3144970000000029  | T | T | T |
|                    | 0.0834520000000012 | 0.4166850000000011  | 0.2268660000000011  | T | T | T |
|                    | 0.2500000000000000 | 0.2500000000000000  | 0.1392870000000030  | F | F | F |
|                    | 0.2477779999999967 | 0.2482919999999993  | 0.4010919999999984  | T | T | T |
|                    | 0.4166669999999968 | 0.3333330000000032  | 0.0514190000000028  | F | F | F |
|                    | 0.4169309999999982 | 0.3336850000000027  | 0.3149159999999966  | T | T | T |
|                    | 0.3333330000000032 | 0.4166669999999968  | 0.2270079999999979  | T | T | T |
|                    | 0.5000000000000000 | 0.2500000000000000  | 0.1392870000000030  | F | F | F |
|                    | 0.5003669999999971 | 0.2479829999999978  | 0.4011190000000013  | T | T | T |
|                    | 0.6666669999999968 | 0.3333330000000032  | 0.0514190000000028  | F | F | F |
|                    | 0.6667899999999989 | 0.3334660000000014  | 0.3142580000000024  | T | T | T |
|                    | 0.5834169999999972 | 0.4167449999999988  | 0.2269950000000023  | T | T | T |
|                    | 0.7500000000000000 | 0.2500000000000000  | 0.1392870000000030  | F | F | F |
|                    | 0.9166669999999968 | 0.3333330000000032  | 0.0514190000000028  | F | F | F |

|                    |                    |                     |                     |   |   |   |
|--------------------|--------------------|---------------------|---------------------|---|---|---|
|                    | 0.9162940000000006 | 0.3332369999999969  | 0.3143389999999968  | T | T | T |
|                    | 0.8332400000000035 | 0.4166290000000004  | 0.2267379999999974  | T | T | T |
|                    | 0.0000000000000000 | 0.5000000000000000  | 0.1392870000000030  | F | F | F |
|                    | 0.0000730000000004 | 0.4979209999999981  | 0.4009849999999986  | T | T | T |
|                    | 0.1666669999999968 | 0.5833330000000032  | 0.0514190000000028  | F | F | F |
|                    | 0.1671630000000022 | 0.5837730000000008  | 0.3143540000000016  | T | T | T |
|                    | 0.0834070000000011 | 0.6669770000000028  | 0.2270480000000035  | T | T | T |
|                    | 0.2500000000000000 | 0.5000000000000000  | 0.1392870000000030  | F | F | F |
|                    | 0.2477779999999967 | 0.4994859999999974  | 0.4010919999999984  | T | T | T |
|                    | 0.4166669999999968 | 0.5833330000000032  | 0.0514190000000028  | F | F | F |
|                    | 0.4169309999999982 | 0.5832460000000026  | 0.3149159999999966  | T | T | T |
|                    | 0.3333050000000028 | 0.6667010000000033  | 0.2267000000000010  | T | T | T |
|                    | 0.5000000000000000 | 0.5000000000000000  | 0.1392870000000030  | F | F | F |
|                    | 0.6666669999999968 | 0.5833330000000032  | 0.0514190000000028  | F | F | F |
|                    | 0.6662729999999968 | 0.5831370000000007  | 0.3150029999999973  | T | T | T |
|                    | 0.5834169999999972 | 0.6666719999999984  | 0.2269950000000023  | T | T | T |
|                    | 0.7500000000000000 | 0.5000000000000000  | 0.1392870000000030  | F | F | F |
|                    | 0.7497060000000033 | 0.4979340000000008  | 0.4009550000000033  | T | T | T |
|                    | 0.9166669999999968 | 0.5833330000000032  | 0.0514190000000028  | F | F | F |
|                    | 0.9168980000000033 | 0.5841380000000029  | 0.3147209999999987  | T | T | T |
|                    | 0.8334059999999965 | 0.6667029999999983  | 0.2268839999999983  | T | T | T |
|                    | 0.0000000000000000 | 0.7500000000000000  | 0.1392870000000030  | F | F | F |
|                    | 0.1666669999999968 | 0.8333330000000032  | 0.0514190000000028  | F | F | F |
|                    | 0.1664669999999973 | 0.8332329999999999  | 0.3150260000000031  | T | T | T |
|                    | 0.0834070000000011 | 0.9164310000000029  | 0.2270480000000035  | T | T | T |
|                    | 0.2500000000000000 | 0.7500000000000000  | 0.1392870000000030  | F | F | F |
|                    | 0.2520159999999976 | 0.7495550000000009  | 0.4009980000000013  | T | T | T |
|                    | 0.4166669999999968 | 0.8333330000000032  | 0.0514190000000028  | F | F | F |
|                    | 0.4163789999999992 | 0.8330020000000005  | 0.3142020000000016  | T | T | T |
|                    | 0.3333969999999979 | 0.9166990000000013  | 0.2268260000000026  | T | T | T |
|                    | 0.5000000000000000 | 0.7500000000000000  | 0.1392870000000030  | F | F | F |
|                    | 0.5003669999999971 | 0.7523839999999993  | 0.4011190000000013  | T | T | T |
|                    | 0.6666669999999968 | 0.8333330000000032  | 0.0514190000000028  | F | F | F |
|                    | 0.6667899999999989 | 0.8333230000000000  | 0.3142580000000024  | T | T | T |
|                    | 0.5834320000000019 | 0.9165300000000016  | 0.2268600000000021  | T | T | T |
|                    | 0.7500000000000000 | 0.7500000000000000  | 0.1392870000000030  | F | F | F |
|                    | 0.7497060000000033 | 0.7517720000000025  | 0.4009550000000033  | T | T | T |
|                    | 0.9166669999999968 | 0.8333330000000032  | 0.0514190000000028  | F | F | F |
|                    | 0.9168980000000033 | 0.8327600000000004  | 0.3147209999999987  | T | T | T |
|                    | 0.8332400000000035 | 0.9166110000000032  | 0.2267379999999974  | T | T | T |
|                    | 0.7500100000000032 | 0.2498580000000032  | 0.4011110000000002  | T | T | T |
|                    | 0.0003389999999968 | 0.7501689999999996  | 0.4063159999999968  | T | T | T |
|                    | 0.4994099999999975 | 0.4997049999999987  | 0.4063749999999970  | T | T | T |
| <b>3Au/Ni(111)</b> | 1.0000000000000000 |                     |                     |   |   |   |
|                    | 8.6224000674449712 | -4.9781450000000014 | 0.0000000000000000  |   |   |   |
|                    | 0.0000000000000000 | 9.9562900000000010  | 0.0000000000000000  |   |   |   |
|                    | 0.0000000000000000 | 0.0000000000000000  | 23.1292800000000014 |   |   |   |
|                    | Ni Au              |                     |                     |   |   |   |
|                    | 77 3               |                     |                     |   |   |   |
|                    | Selective dynamics |                     |                     |   |   |   |
|                    | Direct             |                     |                     |   |   |   |

|                    |                    |                    |       |
|--------------------|--------------------|--------------------|-------|
| 0.0000000000000000 | 0.0000000000000000 | 0.1392870000000030 | F F F |
| 0.0002700478478772 | 0.0053718334725730 | 0.4013600747594808 | T T T |
| 0.1666669999999968 | 0.0833330000000032 | 0.0514190000000028 | F F F |
| 0.1670383230108143 | 0.0837922926729604 | 0.3139715978785560 | T T T |
| 0.0832873509312861 | 0.1665770767488439 | 0.2265491262169093 | T T T |
| 0.2500000000000000 | 0.0000000000000000 | 0.1392870000000030 | F F F |
| 0.2539502366603799 | 0.0049796074902346 | 0.4008557833041948 | T T T |
| 0.4166669999999968 | 0.0833330000000032 | 0.0514190000000028 | F F F |
| 0.4162403762077247 | 0.0834745839550664 | 0.3137691544647367 | T T T |
| 0.3333520232701872 | 0.1666946071819808 | 0.2265759461242425 | T T T |
| 0.5000000000000000 | 0.0000000000000000 | 0.1392870000000030 | F F F |
| 0.4934345745007604 | 0.9943895363685868 | 0.4009401433579214 | T T T |
| 0.6666669999999968 | 0.0833330000000032 | 0.0514190000000028 | F F F |
| 0.6665736965274718 | 0.0837270102466050 | 0.3147605226026045 | T T T |
| 0.5838342715868023 | 0.1672701845134625 | 0.2270436638726636 | T T T |
| 0.7500000000000000 | 0.0000000000000000 | 0.1392870000000030 | F F F |
| 0.7502933782957157 | 0.9956176042370544 | 0.4007830723776635 | T T T |
| 0.9166669999999968 | 0.0833330000000032 | 0.0514190000000028 | F F F |
| 0.9163790228445308 | 0.0830386641742322 | 0.3139762934098584 | T T T |
| 0.8333264866666710 | 0.1667439291589048 | 0.2270215620879696 | T T T |
| 0.0000000000000000 | 0.2500000000000000 | 0.1392870000000030 | F F F |
| 0.0048973123432035 | 0.2494197813785064 | 0.4011854301489137 | T T T |
| 0.1666669999999968 | 0.3333330000000032 | 0.0514190000000028 | F F F |
| 0.1661923062973329 | 0.3332336449471285 | 0.3136883856703889 | T T T |
| 0.0830987524161912 | 0.4167144795283519 | 0.2265947317497066 | T T T |
| 0.2500000000000000 | 0.2500000000000000 | 0.1392870000000030 | F F F |
| 0.2444813970847122 | 0.2451113372805906 | 0.4013021625866315 | T T T |
| 0.4166669999999968 | 0.3333330000000032 | 0.0514190000000028 | F F F |
| 0.4169218463310997 | 0.3336034732246986 | 0.3148522958804207 | T T T |
| 0.3333985620136843 | 0.4166153376904518 | 0.2269664436998298 | T T T |
| 0.5000000000000000 | 0.2500000000000000 | 0.1392870000000030 | F F F |
| 0.4938191455210514 | 0.2439757450085267 | 0.4018603203936095 | T T T |
| 0.6666669999999968 | 0.3333330000000032 | 0.0514190000000028 | F F F |
| 0.6669336356480855 | 0.3332875892502329 | 0.3153052368858766 | T T T |
| 0.5834052682156070 | 0.4165963296213917 | 0.2272180394955399 | T T T |
| 0.7500000000000000 | 0.2500000000000000 | 0.1392870000000030 | F F F |
| 0.9166669999999968 | 0.3333330000000032 | 0.0514190000000028 | F F F |
| 0.9161585044375542 | 0.3333862027634069 | 0.3147903467427255 | T T T |
| 0.8327832431911091 | 0.4164202347046739 | 0.2272367684599530 | T T T |
| 0.0000000000000000 | 0.5000000000000000 | 0.1392870000000030 | F F F |
| 0.0059632687347886 | 0.4997593594448375 | 0.4017449130071071 | T T T |
| 0.1666669999999968 | 0.5833330000000032 | 0.0514190000000028 | F F F |
| 0.1670976202307557 | 0.5833430579346981 | 0.3137323981942046 | T T T |
| 0.0830550443333209 | 0.6668925461607671 | 0.2269986347383011 | T T T |
| 0.2500000000000000 | 0.5000000000000000 | 0.1392870000000030 | F F F |
| 0.2450934368994027 | 0.4990645218006335 | 0.4008138881869456 | T T T |
| 0.4166669999999968 | 0.5833330000000032 | 0.0514190000000028 | F F F |
| 0.4168736892174749 | 0.5835483918342845 | 0.3146888961920880 | T T T |
| 0.3333239123329719 | 0.6666069257380158 | 0.2264761881183972 | T T T |
| 0.5000000000000000 | 0.5000000000000000 | 0.1392870000000030 | F F F |
| 0.6666669999999968 | 0.5833330000000032 | 0.0514190000000028 | F F F |

|                    |                    |                     |                     |   |   |   |
|--------------------|--------------------|---------------------|---------------------|---|---|---|
|                    | 0.6660998974788512 | 0.5829974186018632  | 0.3150476095013843  | T | T | T |
|                    | 0.5833920542180806 | 0.6664593607106255  | 0.2269199289854456  | T | T | T |
|                    | 0.7500000000000000 | 0.5000000000000000  | 0.1392870000000030  | F | F | F |
|                    | 0.7499697948824320 | 0.5000212222649978  | 0.4020961932694789  | T | T | T |
|                    | 0.9166669999999968 | 0.5833330000000032  | 0.0514190000000028  | F | F | F |
|                    | 0.9169058885522219 | 0.5840767166528025  | 0.3150157039639652  | T | T | T |
|                    | 0.8333567447516685 | 0.6666607590702682  | 0.2272505723639782  | T | T | T |
|                    | 0.0000000000000000 | 0.7500000000000000  | 0.1392870000000030  | F | F | F |
|                    | 0.1666669999999968 | 0.8333330000000032  | 0.0514190000000028  | F | F | F |
|                    | 0.1666155907744411 | 0.8332403248456046  | 0.3147783672423614  | T | T | T |
|                    | 0.0831902570170229 | 0.9161995750365293  | 0.2270254752856289  | T | T | T |
|                    | 0.2500000000000000 | 0.7500000000000000  | 0.1392870000000030  | F | F | F |
|                    | 0.2550523570086582 | 0.7489164091350133  | 0.4008595971810394  | T | T | T |
|                    | 0.4166669999999968 | 0.8333330000000032  | 0.0514190000000028  | F | F | F |
|                    | 0.4166480412148630 | 0.8333155688325888  | 0.3133679347020504  | T | T | T |
|                    | 0.3332987729936150 | 0.9168672335438472  | 0.2265877376522454  | T | T | T |
|                    | 0.5000000000000000 | 0.7500000000000000  | 0.1392870000000030  | F | F | F |
|                    | 0.5006334286757976 | 0.7560601215053495  | 0.4008425447423960  | T | T | T |
|                    | 0.6666669999999968 | 0.8333330000000032  | 0.0514190000000028  | F | F | F |
|                    | 0.6666929379429476 | 0.8334427082336973  | 0.3135474990901130  | T | T | T |
|                    | 0.5836547804680734 | 0.9169149141951110  | 0.2265408338621313  | T | T | T |
|                    | 0.7500000000000000 | 0.7500000000000000  | 0.1392870000000030  | F | F | F |
|                    | 0.7499207740962888 | 0.7560638882674553  | 0.4017436313777338  | T | T | T |
|                    | 0.9166669999999968 | 0.8333330000000032  | 0.0514190000000028  | F | F | F |
|                    | 0.9164856786410098 | 0.8327570810940443  | 0.3148469678337733  | T | T | T |
|                    | 0.8334457105899560 | 0.9164937776929349  | 0.2266195745524868  | T | T | T |
|                    | 0.7496551027695233 | 0.2473431817794918  | 0.4186585257503737  | T | T | T |
|                    | 0.0024807269501110 | 0.7521961315227159  | 0.4186053062695549  | T | T | T |
|                    | 0.4976957921070664 | 0.5002722842597862  | 0.4187111914159090  | T | T | T |
| <b>3Ni/Cu(111)</b> | 1.0000000000000000 |                     |                     |   |   |   |
|                    | 8.8905944857135406 | -5.1329871195825199 | -0.0000000000000010 |   |   |   |
|                    | 0.0000000000000000 | 10.2659742391650006 | 0.0000000000000010  |   |   |   |
|                    | 0.0000000000000000 | 0.0000000000000000  | 23.3821328661704015 |   |   |   |
|                    | Ni                 | Cu                  |                     |   |   |   |
|                    | 3                  | 77                  |                     |   |   |   |
|                    | Selective dynamics |                     |                     |   |   |   |
|                    | Direct             |                     |                     |   |   |   |
|                    | 0.2507081561463522 | 0.2502916714946721  | 0.3796405989742695  | T | T | T |
|                    | 0.7497083285053279 | 0.5004164846516801  | 0.3796405989742695  | T | T | T |
|                    | 0.4995835153483199 | 0.7492918438536478  | 0.3796405989742695  | T | T | T |
|                    | 0.0000000000000000 | 0.0000000000000000  | 0.1155258754999977  | F | F | F |
|                    | 0.0015403814068691 | 0.0013737891498735  | 0.3832832429070834  | T | T | T |
|                    | 0.1666666667000030 | 0.083333332999970   | 0.0259047434999999  | F | F | F |
|                    | 0.1668599377241691 | 0.0836082669356912  | 0.2942383970864881  | T | T | T |
|                    | 0.0831809958411753 | 0.1665698892741645  | 0.2048219767307202  | T | T | T |
|                    | 0.2500000000000000 | 0.0000000000000000  | 0.1155258754999977  | F | F | F |
|                    | 0.2502347630585291 | 0.0017325466086007  | 0.3832790271418105  | T | T | T |
|                    | 0.4166666667000030 | 0.083333332999970   | 0.0259047434999999  | F | F | F |
|                    | 0.4168998871534271 | 0.0835990318340976  | 0.2944834298083165  | T | T | T |
|                    | 0.3333742438989944 | 0.1665997606819758  | 0.2047921407905235  | T | T | T |
|                    | 0.5000000000000000 | 0.0000000000000000  | 0.1155258754999977  | F | F | F |

|                    |                    |                    |   |   |   |
|--------------------|--------------------|--------------------|---|---|---|
| 0.4998334077430115 | 0.9984596185931309 | 0.3832832429070834 | T | T | T |
| 0.6666666667000030 | 0.0833333332999970 | 0.0259047434999999 | F | F | F |
| 0.6668056524559418 | 0.0834755638677720 | 0.2944589767297217 | T | T | T |
| 0.5833848079247872 | 0.1667018486891720 | 0.2050841423726908 | T | T | T |
| 0.7500000000000000 | 0.0000000000000000 | 0.1155258754999977 | F | F | F |
| 0.7484569181493939 | 0.9980912625923750 | 0.3831663658495188 | T | T | T |
| 0.9166666667000030 | 0.0833333332999970 | 0.0259047434999999 | F | F | F |
| 0.9165244361322280 | 0.0833300884881609 | 0.2944589767297217 | T | T | T |
| 0.8333333332999970 | 0.1666666667000030 | 0.2050822971185440 | T | T | T |
| 0.0000000000000000 | 0.2500000000000000 | 0.1155258754999977 | F | F | F |
| 0.0019087374076250 | 0.250365655570259  | 0.3831663658495188 | T | T | T |
| 0.1666666667000030 | 0.3333333332999970 | 0.0259047434999999 | F | F | F |
| 0.1670396665042020 | 0.3334115860294062 | 0.2942248883745222 | T | T | T |
| 0.0833170406643760 | 0.4166151920752128 | 0.2050841423726908 | T | T | T |
| 0.2500000000000000 | 0.2500000000000000 | 0.1155258754999977 | F | F | F |
| 0.4166666667000030 | 0.3333333332999970 | 0.0259047434999999 | F | F | F |
| 0.4165463606061692 | 0.3334306519173396 | 0.2940631338007051 | T | T | T |
| 0.3334335014897505 | 0.4168519548482053 | 0.2047848336814226 | T | T | T |
| 0.5000000000000000 | 0.2500000000000000 | 0.1155258754999977 | F | F | F |
| 0.5001870527479397 | 0.2520654640267495 | 0.3832925995276355 | T | T | T |
| 0.6666666667000030 | 0.3333333332999970 | 0.0259047434999999 | F | F | F |
| 0.6665884139705938 | 0.3336280803747798 | 0.2942248883745222 | T | T | T |
| 0.5831480451517947 | 0.4165815467415541 | 0.2047848336814226 | T | T | T |
| 0.7500000000000000 | 0.2500000000000000 | 0.1155258754999977 | F | F | F |
| 0.7496343444429741 | 0.2515430818506061 | 0.3831663658495188 | T | T | T |
| 0.9166666667000030 | 0.3333333332999970 | 0.0259047434999999 | F | F | F |
| 0.9166699115118391 | 0.3331943475440582 | 0.2944589767297217 | T | T | T |
| 0.8334301107258355 | 0.4166111066670197 | 0.2048219767307202 | T | T | T |
| 0.0000000000000000 | 0.5000000000000000 | 0.1155258754999977 | F | F | F |
| 0.9986262108501265 | 0.5001665922569885 | 0.3832832429070834 | T | T | T |
| 0.1666666667000030 | 0.5833333332999970 | 0.0259047434999999 | F | F | F |
| 0.1666991447806794 | 0.5831001128465729 | 0.2944834298083165 | T | T | T |
| 0.0832849649923588 | 0.6665851425415568 | 0.2050894920580149 | T | T | T |
| 0.2500000000000000 | 0.5000000000000000 | 0.1155258754999977 | F | F | F |
| 0.2518784112788097 | 0.4998129472520603 | 0.3832925995276355 | T | T | T |
| 0.4166666667000030 | 0.5833333332999970 | 0.0259047434999999 | F | F | F |
| 0.4168842914111792 | 0.5834536393938308 | 0.2940631338007051 | T | T | T |
| 0.3332255166829654 | 0.6666257561010056 | 0.2047921407905235 | T | T | T |
| 0.5000000000000000 | 0.5000000000000000 | 0.1155258754999977 | F | F | F |
| 0.5000000000000000 | 0.5000000000000000 | 0.3834012785316148 | T | T | T |
| 0.6666666667000030 | 0.5833333332999970 | 0.0259047434999999 | F | F | F |
| 0.6665693480826604 | 0.5831157085888208 | 0.2940631338007051 | T | T | T |
| 0.5834184532584459 | 0.6665664985102495 | 0.2047848336814226 | T | T | T |
| 0.7500000000000000 | 0.5000000000000000 | 0.1155258754999977 | F | F | F |
| 0.9166666667000030 | 0.5833333332999970 | 0.0259047434999999 | F | F | F |
| 0.9163917330643088 | 0.5832516706884689 | 0.2942383970864881 | T | T | T |
| 0.8334002393180242 | 0.6667744833170346 | 0.2047921407905235 | T | T | T |
| 0.0000000000000000 | 0.7500000000000000 | 0.1155258754999977 | F | F | F |
| 0.9982674533913993 | 0.7485022164499284 | 0.3832790271418105 | T | T | T |
| 0.1666666667000030 | 0.8333333332999970 | 0.0259047434999999 | F | F | F |
| 0.1666666667000030 | 0.8333333332999970 | 0.2946427775492140 | T | T | T |

|                    |                    |                     |                     |   |   |   |
|--------------------|--------------------|---------------------|---------------------|---|---|---|
|                    | 0.0833001774491819 | 0.9167150350076412  | 0.2050894920580149  | T | T | T |
|                    | 0.2500000000000000 | 0.7500000000000000  | 0.1155258754999977  | F | F | F |
|                    | 0.2514977835500716 | 0.7497652369414709  | 0.3832790271418105  | T | T | T |
|                    | 0.4166666667000030 | 0.833333332999970   | 0.0259047434999999  | F | F | F |
|                    | 0.4167483293115311 | 0.8331400622758309  | 0.2942383970864881  | T | T | T |
|                    | 0.3334148574584432 | 0.9166998225508181  | 0.2050894920580149  | T | T | T |
|                    | 0.5000000000000000 | 0.7500000000000000  | 0.1155258754999977  | F | F | F |
|                    | 0.6666666667000030 | 0.833333332999970   | 0.0259047434999999  | F | F | F |
|                    | 0.6663719196252202 | 0.8329603334957980  | 0.2942248883745222  | T | T | T |
|                    | 0.5833888933329803 | 0.9168190041588247  | 0.2048219767307202  | T | T | T |
|                    | 0.7500000000000000 | 0.7500000000000000  | 0.1155258754999977  | F | F | F |
|                    | 0.7479345359732505 | 0.7481215887211903  | 0.3832925995276355  | T | T | T |
|                    | 0.9166666667000030 | 0.833333332999970   | 0.0259047434999999  | F | F | F |
|                    | 0.9164009681659024 | 0.8333008552193206  | 0.2944834298083165  | T | T | T |
|                    | 0.8332981513108280 | 0.9166829593356240  | 0.2050841423726908  | T | T | T |
| <b>3Pd/Cu(111)</b> | 1.0000000000000000 |                     |                     |   |   |   |
|                    | 8.8905944857135406 | -5.1329871195825199 | -0.0000000000000010 |   |   |   |
|                    | 0.0000000000000000 | 10.2659742391650006 | 0.0000000000000010  |   |   |   |
|                    | 0.0000000000000000 | 0.0000000000000000  | 23.3821328661704015 |   |   |   |
|                    | Pd                 | Cu                  |                     |   |   |   |
|                    | 3                  | 77                  |                     |   |   |   |
|                    | Selective dynamics |                     |                     |   |   |   |
|                    | Direct             |                     |                     |   |   |   |
|                    | 0.2488569352431824 | 0.2487644906215110  | 0.3869242018734269  | T | T | T |
|                    | 0.7512355093784890 | 0.5000924446216715  | 0.3869242018734269  | T | T | T |
|                    | 0.4999075553783285 | 0.7511430647568176  | 0.3869242018734269  | T | T | T |
|                    | 0.0000000000000000 | 0.0000000000000000  | 0.1155258754999977  | F | F | F |
|                    | 0.9974968756153331 | 0.9973815771867933  | 0.3834939915773816  | T | T | T |
|                    | 0.1666666667000030 | 0.083333332999970   | 0.0259047434999999  | F | F | F |
|                    | 0.1662992187987129 | 0.0826670748129814  | 0.2940229186135923  | T | T | T |
|                    | 0.0833202120320138 | 0.1667233434898492  | 0.2047337648634908  | T | T | T |
|                    | 0.2500000000000000 | 0.0000000000000000  | 0.1155258754999977  | F | F | F |
|                    | 0.2497894292494109 | 0.9967520148690383  | 0.3834263516320462  | T | T | T |
|                    | 0.4166666667000030 | 0.083333332999970   | 0.0259047434999999  | F | F | F |
|                    | 0.4164890272946451 | 0.0835072017012379  | 0.2941856097550684  | T | T | T |
|                    | 0.3334094292878831 | 0.1668438655574178  | 0.2048092955238516  | T | T | T |
|                    | 0.5000000000000000 | 0.0000000000000000  | 0.1155258754999977  | F | F | F |
|                    | 0.4998847015714603 | 0.0025031243846669  | 0.3834939915773816  | T | T | T |
|                    | 0.6666666667000030 | 0.083333332999970   | 0.0259047434999999  | F | F | F |
|                    | 0.6665507504784074 | 0.0829521784290606  | 0.2942903052378583  | T | T | T |
|                    | 0.5834489942531391 | 0.1668010770276567  | 0.2051297071155176  | T | T | T |
|                    | 0.7500000000000000 | 0.0000000000000000  | 0.1155258754999977  | F | F | F |
|                    | 0.7530284357869164 | 0.0031749126003646  | 0.3834971104212741  | T | T | T |
|                    | 0.9166666667000030 | 0.083333332999970   | 0.0259047434999999  | F | F | F |
|                    | 0.9170478215709394 | 0.0835985719493451  | 0.2942903052378583  | T | T | T |
|                    | 0.833333332999970  | 0.1666666667000030  | 0.2050974763219600  | T | T | T |
|                    | 0.0000000000000000 | 0.2500000000000000  | 0.1155258754999977  | F | F | F |
|                    | 0.9968250873996354 | 0.2498535231865446  | 0.3834971104212741  | T | T | T |
|                    | 0.1666666667000030 | 0.333333332999970   | 0.0259047434999999  | F | F | F |
|                    | 0.1663355382912357 | 0.3335655590277753  | 0.2941737520157233  | T | T | T |
|                    | 0.0833520826745087 | 0.4165510057468609  | 0.2051297071155176  | T | T | T |

|                    |                    |                    |       |
|--------------------|--------------------|--------------------|-------|
| 0.2500000000000000 | 0.2500000000000000 | 0.1155258754999977 | F F F |
| 0.4166666667000030 | 0.3333333332999970 | 0.0259047434999999 | F F F |
| 0.4173341547606384 | 0.3336005263266699 | 0.2943723508557312 | T T T |
| 0.3335267493080138 | 0.4168846495189982 | 0.2050139078915763 | T T T |
| 0.5000000000000000 | 0.2500000000000000 | 0.1155258754999977 | F F F |
| 0.5000454869741731 | 0.2461385512142868 | 0.3840181598767316 | T T T |
| 0.6666666667000030 | 0.3333333332999970 | 0.0259047434999999 | F F F |
| 0.6664344409722247 | 0.3327699791634515 | 0.2941737520157233 | T T T |
| 0.5831153504810018 | 0.4166420998890246 | 0.2050139078915763 | T T T |
| 0.7500000000000000 | 0.2500000000000000 | 0.1155258754999977 | F F F |
| 0.7501464768134554 | 0.2469715642130836 | 0.3834971104212741 | T T T |
| 0.9166666667000030 | 0.3333333332999970 | 0.0259047434999999 | F F F |
| 0.9164014280506549 | 0.3334492495215926 | 0.2942903052378583 | T T T |
| 0.8332766565101508 | 0.4165968686421806 | 0.2047337648634908 | T T T |
| 0.0000000000000000 | 0.5000000000000000 | 0.1155258754999977 | F F F |
| 0.0026184228132067 | 0.5001152984285397 | 0.3834939915773816 | T T T |
| 0.1666666667000030 | 0.5833333332999970 | 0.0259047434999999 | F F F |
| 0.1670181745066017 | 0.5835109727053549 | 0.2941856097550684 | T T T |
| 0.0831477219951182 | 0.6664278946966036 | 0.2049491635474396 | T T T |
| 0.2500000000000000 | 0.5000000000000000 | 0.1155258754999977 | F F F |
| 0.2460930642401209 | 0.4999545130258269 | 0.3840181598767316 | T T T |
| 0.4166666667000030 | 0.5833333332999970 | 0.0259047434999999 | F F F |
| 0.4162663716660333 | 0.5826658452393616 | 0.2943723508557312 | T T T |
| 0.3334344361695258 | 0.6665905707121169 | 0.2048092955238516 | T T T |
| 0.5000000000000000 | 0.5000000000000000 | 0.1155258754999977 | F F F |
| 0.5000000000000000 | 0.5000000000000000 | 0.3844603538008187 | T T T |
| 0.6666666667000030 | 0.5833333332999970 | 0.0259047434999999 | F F F |
| 0.6663994736733301 | 0.5837336283339667 | 0.2943723508557312 | T T T |
| 0.5833579001109754 | 0.6664732506919862 | 0.2050139078915763 | T T T |
| 0.7500000000000000 | 0.5000000000000000 | 0.1155258754999977 | F F F |
| 0.9166666667000030 | 0.5833333332999970 | 0.0259047434999999 | F F F |
| 0.9173329251870186 | 0.5836321438857226 | 0.2940229186135923 | T T T |
| 0.8331561344425822 | 0.6665655638304742 | 0.2048092955238516 | T T T |
| 0.0000000000000000 | 0.7500000000000000 | 0.1155258754999977 | F F F |
| 0.0032479851309617 | 0.7530374143803797 | 0.3834263516320462 | T T T |
| 0.1666666667000030 | 0.8333333332999970 | 0.0259047434999999 | F F F |
| 0.1666666667000030 | 0.8333333332999970 | 0.2939199276550042 | T T T |
| 0.0832801726014765 | 0.9168522780048818 | 0.2049491635474396 | T T T |
| 0.2500000000000000 | 0.7500000000000000 | 0.1155258754999977 | F F F |
| 0.2469625856196203 | 0.7502105707505891 | 0.3834263516320462 | T T T |
| 0.4166666667000030 | 0.8333333332999970 | 0.0259047434999999 | F F F |
| 0.4163678561142774 | 0.8337007812012871 | 0.2940229186135923 | T T T |
| 0.3335721053033964 | 0.9167198273985235 | 0.2049491635474396 | T T T |
| 0.5000000000000000 | 0.7500000000000000 | 0.1155258754999977 | F F F |
| 0.6666666667000030 | 0.8333333332999970 | 0.0259047434999999 | F F F |
| 0.6672300208365485 | 0.8336644617087643 | 0.2941737520157233 | T T T |
| 0.5834031313578194 | 0.9166797879679862 | 0.2047337648634908 | T T T |
| 0.7500000000000000 | 0.7500000000000000 | 0.1155258754999977 | F F F |
| 0.7538614487857132 | 0.7539069357598791 | 0.3840181598767316 | T T T |
| 0.9166666667000030 | 0.8333333332999970 | 0.0259047434999999 | F F F |
| 0.9164927982987621 | 0.8329818254933983 | 0.2941856097550684 | T T T |



|                    |                    |                     |                     |   |   |   |  |
|--------------------|--------------------|---------------------|---------------------|---|---|---|--|
|                    | 0.8331989229723433 | 0.9166479173254913  | 0.2051297071155176  | T | T | T |  |
| <b>3Pt/Cu(111)</b> | 1.00000000000000   |                     |                     |   |   |   |  |
|                    | 8.8905944857135406 | -5.1329871195825199 | -0.0000000000000010 |   |   |   |  |
|                    | 0.0000000000000000 | 10.2659742391650006 | 0.0000000000000010  |   |   |   |  |
|                    | 0.0000000000000000 | 0.0000000000000000  | 23.3821328661704015 |   |   |   |  |
|                    | Pt                 | Cu                  |                     |   |   |   |  |
|                    | 3                  | 77                  |                     |   |   |   |  |
|                    | Selective dynamics |                     |                     |   |   |   |  |
|                    | Direct             |                     |                     |   |   |   |  |
|                    | 0.2485808714129823 | 0.2484672240514232  | 0.3847966050964930  | T | T | T |  |
|                    | 0.7515327759485770 | 0.5001136473615592  | 0.3847966050964930  | T | T | T |  |
|                    | 0.4998863526384410 | 0.7514191285870176  | 0.3847966050964930  | T | T | T |  |
|                    | 0.0000000000000000 | 0.0000000000000000  | 0.1155258754999977  | F | F | F |  |
|                    | 0.9980081471752634 | 0.9976858575769504  | 0.3842977358316493  | T | T | T |  |
|                    | 0.1666666667000030 | 0.0833333332999970  | 0.0259047434999999  | F | F | F |  |
|                    | 0.1655848402537705 | 0.0814245205741783  | 0.2934838688879192  | T | T | T |  |
|                    | 0.0830560744444687 | 0.1666626576754068  | 0.2047731899533312  | T | T | T |  |
|                    | 0.2500000000000000 | 0.0000000000000000  | 0.1155258754999977  | F | F | F |  |
|                    | 0.2493341858885864 | 0.9974984028068189  | 0.3843283363739530  | T | T | T |  |
|                    | 0.4166666667000030 | 0.0833333332999970  | 0.0259047434999999  | F | F | F |  |
|                    | 0.4168767814286695 | 0.0834924899538035  | 0.2946786423358834  | T | T | T |  |
|                    | 0.3334467153527063 | 0.1666510792855787  | 0.2048002707897832  | T | T | T |  |
|                    | 0.5000000000000000 | 0.0000000000000000  | 0.1155258754999977  | F | F | F |  |
|                    | 0.4996777104016871 | 0.0019918528247367  | 0.3842977358316493  | T | T | T |  |
| 0.6666666667000030 | 0.0833333332999970 | 0.0259047434999999  | F                   | F | F |   |  |
| 0.6670378670734078 | 0.0837269007349113 | 0.2945854608659731  | T                   | T | T |   |  |
| 0.5833861565977690 | 0.1667000060406588 | 0.2051410902868618  | T                   | T | T |   |  |
| 0.7500000000000000 | 0.0000000000000000 | 0.1155258754999977  | F                   | F | F |   |  |
| 0.7522431193113550 | 0.0024273386455645 | 0.3842686594019611  | T                   | T | T |   |  |
| 0.9166666667000030 | 0.0833333332999970 | 0.0259047434999999  | F                   | F | F |   |  |
| 0.9162730992650888 | 0.0833109662384876 | 0.2945854608659731  | T                   | T | T |   |  |
| 0.8333333332999970 | 0.1666666667000030 | 0.2051451822520068  | T                   | T | T |   |  |
| 0.0000000000000000 | 0.2500000000000000 | 0.1155258754999977  | F                   | F | F |   |  |
| 0.9975726613544353 | 0.2498157806657834 | 0.3842686594019611  | T                   | T | T |   |  |
| 0.1666666667000030 | 0.3333333332999970 | 0.0259047434999999  | F                   | F | F |   |  |
| 0.1658311593136631 | 0.3344025759669964 | 0.2938244142577896  | T                   | T | T |   |  |
| 0.0833138493428808 | 0.4166138434022310 | 0.2051410902868618  | T                   | T | T |   |  |
| 0.2500000000000000 | 0.2500000000000000 | 0.1155258754999977  | F                   | F | F |   |  |
| 0.4166666667000030 | 0.3333333332999970 | 0.0259047434999999  | F                   | F | F |   |  |
| 0.4179675874129940 | 0.3340631959186154 | 0.2939910441875354  | T                   | T | T |   |  |
| 0.3335457645735377 | 0.4170691555848086 | 0.2048739615341442  | T                   | T | T |   |  |
| 0.5000000000000000 | 0.2500000000000000 | 0.1155258754999977  | F                   | F | F |   |  |
| 0.5000865940759540 | 0.2473538557577291 | 0.3856105631074070  | T                   | T | T |   |  |
| 0.6666666667000030 | 0.3333333332999970 | 0.0259047434999999  | F                   | F | F |   |  |
| 0.6655974240330037 | 0.3314285832466579 | 0.2938244142577896  | T                   | T | T |   |  |
| 0.5829308444151844 | 0.4164766090887309 | 0.2048739615341442  | T                   | T | T |   |  |
| 0.7500000000000000 | 0.2500000000000000 | 0.1155258754999977  | F                   | F | F |   |  |
| 0.7501842193342165 | 0.2477568806886450 | 0.3842686594019611  | T                   | T | T |   |  |
| 0.9166666667000030 | 0.3333333332999970 | 0.0259047434999999  | F                   | F | F |   |  |
| 0.9166890337615122 | 0.3329621329265922 | 0.2945854608659731  | T                   | T | T |   |  |
| 0.8333373423245933 | 0.4163934168690709 | 0.2047731899533312  | T                   | T | T |   |  |

|                    |                    |                     |                     |   |   |   |
|--------------------|--------------------|---------------------|---------------------|---|---|---|
|                    | 0.0000000000000000 | 0.5000000000000000  | 0.1155258754999977  | F | F | F |
|                    | 0.0023141424230497 | 0.5003222895983132  | 0.3842977358316493  | T | T | T |
|                    | 0.1666666667000030 | 0.5833333332999970  | 0.0259047434999999  | F | F | F |
|                    | 0.1666157086251429 | 0.5831232185713304  | 0.2946786423358834  | T | T | T |
|                    | 0.0833536527871425 | 0.6665644925133090  | 0.2050472174287443  | T | T | T |
|                    | 0.2500000000000000 | 0.5000000000000000  | 0.1155258754999977  | F | F | F |
|                    | 0.2472672616817750 | 0.4999134059240459  | 0.3856105631074070  | T | T | T |
|                    | 0.4166666667000030 | 0.5833333332999970  | 0.0259047434999999  | F | F | F |
|                    | 0.4160956086056301 | 0.5820324125870059  | 0.2939910441875354  | T | T | T |
|                    | 0.3332043638328706 | 0.6665532846472938  | 0.2048002707897832  | T | T | T |
|                    | 0.5000000000000000 | 0.5000000000000000  | 0.1155258754999977  | F | F | F |
|                    | 0.5000000000000000 | 0.5000000000000000  | 0.3870546433405890  | T | T | T |
|                    | 0.6666666667000030 | 0.5833333332999970  | 0.0259047434999999  | F | F | F |
|                    | 0.6659368040813847 | 0.5839043913943699  | 0.2939910441875354  | T | T | T |
|                    | 0.5835233909112690 | 0.6664542354264622  | 0.2048739615341442  | T | T | T |
|                    | 0.7500000000000000 | 0.5000000000000000  | 0.1155258754999977  | F | F | F |
|                    | 0.9166666667000030 | 0.5833333332999970  | 0.0259047434999999  | F | F | F |
|                    | 0.9185754794258219 | 0.5841603195795833  | 0.2934838688879192  | T | T | T |
|                    | 0.8333489207144212 | 0.6667956361671294  | 0.2048002707897832  | T | T | T |
|                    | 0.0000000000000000 | 0.7500000000000000  | 0.1155258754999977  | F | F | F |
|                    | 0.0025015971931811 | 0.7518357830817672  | 0.3843283363739530  | T | T | T |
|                    | 0.1666666667000030 | 0.8333333332999970  | 0.0259047434999999  | F | F | F |
|                    | 0.1666666667000030 | 0.8333333332999970  | 0.2946518099123288  | T | T | T |
|                    | 0.0832108396261647 | 0.9166463472128574  | 0.2050472174287443  | T | T | T |
|                    | 0.2500000000000000 | 0.7500000000000000  | 0.1155258754999977  | F | F | F |
|                    | 0.2481642169182325 | 0.7506658141114135  | 0.3843283363739530  | T | T | T |
|                    | 0.4166666667000030 | 0.8333333332999970  | 0.0259047434999999  | F | F | F |
|                    | 0.4158396804204166 | 0.8344151597462295  | 0.2934838688879192  | T | T | T |
|                    | 0.3334355074866910 | 0.9167891603738353  | 0.2050472174287443  | T | T | T |
|                    | 0.5000000000000000 | 0.7500000000000000  | 0.1155258754999977  | F | F | F |
|                    | 0.6666666667000030 | 0.8333333332999970  | 0.0259047434999999  | F | F | F |
|                    | 0.6685714167533421 | 0.8341688406863367  | 0.2938244142577896  | T | T | T |
|                    | 0.5836065831309289 | 0.9169439255555313  | 0.2047731899533312  | T | T | T |
|                    | 0.7500000000000000 | 0.7500000000000000  | 0.1155258754999977  | F | F | F |
|                    | 0.7526461442422708 | 0.7527327383182250  | 0.3856105631074070  | T | T | T |
|                    | 0.9166666667000030 | 0.8333333332999970  | 0.0259047434999999  | F | F | F |
|                    | 0.9165075100461967 | 0.8333842913748573  | 0.2946786423358834  | T | T | T |
|                    | 0.8332999939593408 | 0.9166861506571192  | 0.2051410902868618  | T | T | T |
| <b>(5) 3X-S2</b>   |                    |                     |                     |   |   |   |
| <b>3Cu/Ni(111)</b> | 1.0000000000000000 |                     |                     |   |   |   |
|                    | 8.6224000674449712 | -4.9781450000000014 | 0.0000000000000000  |   |   |   |
|                    | 0.0000000000000000 | 9.9562900000000010  | 0.0000000000000000  |   |   |   |
|                    | 0.0000000000000000 | 0.0000000000000000  | 23.1292800000000014 |   |   |   |
|                    | Ni                 | Cu                  |                     |   |   |   |
|                    | 77                 | 3                   |                     |   |   |   |
|                    | Selective dynamics |                     |                     |   |   |   |
|                    | Direct             |                     |                     |   |   |   |
|                    | 0.0000000000000000 | 0.0000000000000000  | 0.1392870000000030  | F | F | F |
|                    | 0.1666669999999968 | 0.0833330000000032  | 0.0514190000000028  | F | F | F |
|                    | 0.1668217419313797 | 0.0834013478538435  | 0.3146611309027919  | T | T | T |
|                    | 0.0834205783652514 | 0.1666803547026653  | 0.2269946148295845  | T | T | T |

|                    |                     |                    |       |
|--------------------|---------------------|--------------------|-------|
| 0.2500000000000000 | 0.0000000000000000  | 0.1392870000000030 | F F F |
| 0.2497871189722577 | 0.9994021352583896  | 0.4008847092058826 | T T T |
| 0.4166669999999968 | 0.0833330000000032  | 0.0514190000000028 | F F F |
| 0.4166903483573084 | 0.0833622070484222  | 0.3146248716768822 | T T T |
| 0.3333433445743766 | 0.1666370072155678  | 0.2264834631084065 | T T T |
| 0.5000000000000000 | 0.0000000000000000  | 0.1392870000000030 | F F F |
| 0.6666669999999968 | 0.0833330000000032  | 0.0514190000000028 | F F F |
| 0.6664027207275495 | 0.0831981969273067  | 0.3147476053832554 | T T T |
| 0.5833198657524706 | 0.1666947298078920  | 0.2269780023973041 | T T T |
| 0.7500000000000000 | 0.0000000000000000  | 0.1392870000000030 | F F F |
| 0.7500045951367376 | -0.0000584677838184 | 0.4010473444011461 | T T T |
| 0.9166669999999968 | 0.0833330000000032  | 0.0514190000000028 | F F F |
| 0.9168243871615749 | 0.0832050139706159  | 0.3147449327135403 | T T T |
| 0.8333757896106530 | 0.1667152937909798  | 0.2265849903878021 | T T T |
| 0.0000000000000000 | 0.2500000000000000  | 0.1392870000000030 | F F F |
| 0.0000057757828391 | 0.2520973953539450  | 0.4010303726770343 | T T T |
| 0.1666669999999968 | 0.3333330000000032  | 0.0514190000000028 | F F F |
| 0.1666878585862378 | 0.3333171888241528  | 0.3144596244912263 | T T T |
| 0.0834530409690382 | 0.4165455252540747  | 0.2268566026090739 | T T T |
| 0.2500000000000000 | 0.2500000000000000  | 0.1392870000000030 | F F F |
| 0.2497239462430155 | 0.2502808937932618  | 0.4009003082340099 | T T T |
| 0.4166669999999968 | 0.3333330000000032  | 0.0514190000000028 | F F F |
| 0.4166180733648107 | 0.3332056350827591  | 0.3146621337141084 | T T T |
| 0.3333184597746532 | 0.4165794897654936  | 0.2269913970201871 | T T T |
| 0.5000000000000000 | 0.2500000000000000  | 0.1392870000000030 | F F F |
| 0.500590522751063  | 0.2502152796010817  | 0.4008857420330082 | T T T |
| 0.6666669999999968 | 0.3333330000000032  | 0.0514190000000028 | F F F |
| 0.6665881030836985 | 0.3332942150474033  | 0.3144121961100342 | T T T |
| 0.5832774658678945 | 0.4166121711240798  | 0.2269916306234684 | T T T |
| 0.7500000000000000 | 0.2500000000000000  | 0.1392870000000030 | F F F |
| 0.7521236872532134 | 0.2520864449007533  | 0.4009917307323672 | T T T |
| 0.9166669999999968 | 0.3333330000000032  | 0.0514190000000028 | F F F |
| 0.9164510909857972 | 0.3328776906681858  | 0.3142356775556304 | T T T |
| 0.8331350434920402 | 0.4165838147412799  | 0.2268547211556521 | T T T |
| 0.0000000000000000 | 0.5000000000000000  | 0.1392870000000030 | F F F |
| 0.0000172224940915 | 0.5000036049308320  | 0.4015330467678458 | T T T |
| 0.1666669999999968 | 0.5833330000000032  | 0.0514190000000028 | F F F |
| 0.1671282685839985 | 0.5835618184249424  | 0.3142432967962712 | T T T |
| 0.0834225758242568 | 0.6668831813586606  | 0.2268536435551044 | T T T |
| 0.2500000000000000 | 0.5000000000000000  | 0.1392870000000030 | F F F |
| 0.2479083509622985 | 0.4999992617173909  | 0.4010328885396960 | T T T |
| 0.4166669999999968 | 0.5833330000000032  | 0.0514190000000028 | F F F |
| 0.4168067526392941 | 0.5831744517477163  | 0.3147418036046181 | T T T |
| 0.3332961273646147 | 0.6666430971771157  | 0.2265912904890878 | T T T |
| 0.5000000000000000 | 0.5000000000000000  | 0.1392870000000030 | F F F |
| 0.6666669999999968 | 0.5833330000000032  | 0.0514190000000028 | F F F |
| 0.6663884828777986 | 0.5831981375251134  | 0.3147444167098103 | T T T |
| 0.5833853915851230 | 0.6668287206679112  | 0.2270044843070282 | T T T |
| 0.7500000000000000 | 0.5000000000000000  | 0.1392870000000030 | F F F |
| 0.7520881378304944 | 0.4999656420397730  | 0.4010062843619277 | T T T |
| 0.9166669999999968 | 0.5833330000000032  | 0.0514190000000028 | F F F |

|                    |                    |                     |                     |   |   |   |
|--------------------|--------------------|---------------------|---------------------|---|---|---|
|                    | 0.9164624271755447 | 0.5835596390944611  | 0.3142547134351488  | T | T | T |
|                    | 0.8333428286543724 | 0.6666512620277236  | 0.2265916728741109  | T | T | T |
|                    | 0.0000000000000000 | 0.7500000000000000  | 0.1392870000000030  | F | F | F |
|                    | 0.0000252850670859 | 0.7479035101279601  | 0.4010079158193635  | T | T | T |
|                    | 0.1666669999999968 | 0.8333330000000032  | 0.0514190000000028  | F | F | F |
|                    | 0.1666851631490601 | 0.8333727929228153  | 0.3144240632169244  | T | T | T |
|                    | 0.0833742001673004 | 0.9167136957085716  | 0.2269905919647646  | T | T | T |
|                    | 0.2500000000000000 | 0.7500000000000000  | 0.1392870000000030  | F | F | F |
|                    | 0.2479058161202161 | 0.7478859004122566  | 0.4010099255990185  | T | T | T |
|                    | 0.4166669999999968 | 0.8333330000000032  | 0.0514190000000028  | F | F | F |
|                    | 0.4168055216477833 | 0.8336182277842223  | 0.3147439398011569  | T | T | T |
|                    | 0.3333092868426851 | 0.9166887304265269  | 0.2269842178000515  | T | T | T |
|                    | 0.5000000000000000 | 0.7500000000000000  | 0.1392870000000030  | F | F | F |
|                    | 0.5000474465138214 | 0.7499868746464327  | 0.4010457315612752  | T | T | T |
|                    | 0.6666669999999968 | 0.8333330000000032  | 0.0514190000000028  | F | F | F |
|                    | 0.6666720523123674 | 0.8333286611544326  | 0.3146773060554804  | T | T | T |
|                    | 0.5834055870646030 | 0.9165916153063828  | 0.2270004315854389  | T | T | T |
|                    | 0.7500000000000000 | 0.7500000000000000  | 0.1392870000000030  | F | F | F |
|                    | 0.7499945460745525 | 0.7500074947252651  | 0.4010471289070148  | T | T | T |
|                    | 0.9166669999999968 | 0.8333330000000032  | 0.0514190000000028  | F | F | F |
|                    | 0.9168015872694990 | 0.8335880112110162  | 0.3147453753921010  | T | T | T |
|                    | 0.8331616534195719 | 0.9165980255023771  | 0.2270075193844086  | T | T | T |
|                    | 0.4999955057382274 | 0.0000163125090950  | 0.4062461055606420  | T | T | T |
|                    | 0.0001242489793254 | 0.0000336028213530  | 0.4062482635123179  | T | T | T |
|                    | 0.4999669426878178 | 0.4998783245859544  | 0.4062499328004091  | T | T | T |
| <b>3Ag/Ni(111)</b> | 1.0000000000000000 |                     |                     |   |   |   |
|                    | 8.6224000674449712 | -4.9781450000000014 | 0.0000000000000000  |   |   |   |
|                    | 0.0000000000000000 | 9.9562900000000010  | 0.0000000000000000  |   |   |   |
|                    | 0.0000000000000000 | 0.0000000000000000  | 23.1292800000000014 |   |   |   |
|                    | Ni                 | Ag                  |                     |   |   |   |
|                    | 77                 | 3                   |                     |   |   |   |
|                    | Selective dynamics |                     |                     |   |   |   |
|                    | Direct             |                     |                     |   |   |   |
|                    | 0.0000000000000000 | 0.0000000000000000  | 0.1392870000000030  | F | F | F |
|                    | 0.0000146523920725 | 0.0000135563512981  | 0.4000192181866987  | T | T | T |
|                    | 0.1666669999999968 | 0.0833330000000032  | 0.0514190000000028  | F | F | F |
|                    | 0.1676218132406581 | 0.0838757211340792  | 0.3131096350507976  | T | T | T |
|                    | 0.0834937536546492 | 0.1669851149264677  | 0.2263467713253747  | T | T | T |
|                    | 0.2500000000000000 | 0.0000000000000000  | 0.1392870000000030  | F | F | F |
|                    | 0.2446393004388171 | 0.0000356116085579  | 0.4002116121422104  | T | T | T |
|                    | 0.4166669999999968 | 0.0833330000000032  | 0.0514190000000028  | F | F | F |
|                    | 0.4173858601949359 | 0.0822223304711715  | 0.3153351511921103  | T | T | T |
|                    | 0.3339822965569651 | 0.1669887522511525  | 0.2267585549120622  | T | T | T |
|                    | 0.5000000000000000 | 0.0000000000000000  | 0.1392870000000030  | F | F | F |
|                    | 0.6666669999999968 | 0.0833330000000032  | 0.0514190000000028  | F | F | F |
|                    | 0.6648747785075295 | 0.0822437825438415  | 0.3153310781385538  | T | T | T |
|                    | 0.5832801512617208 | 0.1665663730016947  | 0.2270970294827965  | T | T | T |
|                    | 0.7500000000000000 | 0.0000000000000000  | 0.1392870000000030  | F | F | F |
|                    | 0.7553999192102917 | 0.0000323750486488  | 0.4002245878507309  | T | T | T |
|                    | 0.9166669999999968 | 0.0833330000000032  | 0.0514190000000028  | F | F | F |
|                    | 0.9162470333985134 | 0.0838526359255450  | 0.3131125583668632  | T | T | T |

|                    |                    |                    |   |   |   |
|--------------------|--------------------|--------------------|---|---|---|
| 0.8330120128374396 | 0.1669896190652739 | 0.2267591756994049 | T | T | T |
| 0.0000000000000000 | 0.2500000000000000 | 0.1392870000000030 | F | F | F |
| 0.0000678959569283 | 0.2447547648107305 | 0.4002385057393180 | T | T | T |
| 0.1666669999999968 | 0.3333330000000032 | 0.0514190000000028 | F | F | F |
| 0.1667046828764319 | 0.3334167297614393 | 0.3137445412507827 | T | T | T |
| 0.0832624110785770 | 0.4167679272974907 | 0.2269155468480243 | T | T | T |
| 0.2500000000000000 | 0.2500000000000000 | 0.1392870000000030 | F | F | F |
| 0.2446850082335940 | 0.2447654012853685 | 0.4002313424015727 | T | T | T |
| 0.4166669999999968 | 0.3333330000000032 | 0.0514190000000028 | F | F | F |
| 0.4173950779306017 | 0.3352543376541037 | 0.3153516083579776 | T | T | T |
| 0.3335071416583287 | 0.4167686629039468 | 0.2269078001940080 | T | T | T |
| 0.5000000000000000 | 0.2500000000000000 | 0.1392870000000030 | F | F | F |
| 0.4999407018840299 | 0.2500289273585621 | 0.4000352550346267 | T | T | T |
| 0.6666669999999968 | 0.3333330000000032 | 0.0514190000000028 | F | F | F |
| 0.6666635602708884 | 0.3333336197685839 | 0.3142796892686102 | T | T | T |
| 0.5832905584886208 | 0.4166625592118610 | 0.2271017133498920 | T | T | T |
| 0.7500000000000000 | 0.2500000000000000 | 0.1392870000000030 | F | F | F |
| 0.7500628995262416 | 0.2500223369598703 | 0.4000433222507698 | T | T | T |
| 0.9166669999999968 | 0.3333330000000032 | 0.0514190000000028 | F | F | F |
| 0.9178696039899465 | 0.3352656139286316 | 0.3153568114456716 | T | T | T |
| 0.8333504987414451 | 0.4166489365999212 | 0.2271002030973797 | T | T | T |
| 0.0000000000000000 | 0.5000000000000000 | 0.1392870000000030 | F | F | F |
| 0.1666669999999968 | 0.5833330000000032 | 0.0514190000000028 | F | F | F |
| 0.1656564876279996 | 0.5828627041371487 | 0.3148802604756046 | T | T | T |
| 0.0832373427010532 | 0.6664917231402991 | 0.2269053715542637 | T | T | T |
| 0.2500000000000000 | 0.5000000000000000 | 0.1392870000000030 | F | F | F |
| 0.2491462141077977 | 0.4983056737031927 | 0.3994688166725810 | T | T | T |
| 0.4166669999999968 | 0.5833330000000032 | 0.0514190000000028 | F | F | F |
| 0.4172111298265326 | 0.5828481470517136 | 0.3148808814694094 | T | T | T |
| 0.3333403366330501 | 0.6666669618506970 | 0.2268689211980346 | T | T | T |
| 0.5000000000000000 | 0.5000000000000000 | 0.1392870000000030 | F | F | F |
| 0.6666669999999968 | 0.5833330000000032 | 0.0514190000000028 | F | F | F |
| 0.6648225264038634 | 0.5826461315554519 | 0.3153265029468756 | T | T | T |
| 0.5832706118938579 | 0.6665116647190653 | 0.2269065069973736 | T | T | T |
| 0.7500000000000000 | 0.5000000000000000 | 0.1392870000000030 | F | F | F |
| 0.7500741189843402 | 0.5001507165351697 | 0.4000270684316133 | T | T | T |
| 0.9166669999999968 | 0.5833330000000032 | 0.0514190000000028 | F | F | F |
| 0.9178153939029406 | 0.5826400967464962 | 0.3153140208453429 | T | T | T |
| 0.8330060571398075 | 0.6660041093971237 | 0.2267487969613120 | T | T | T |
| 0.0000000000000000 | 0.7500000000000000 | 0.1392870000000030 | F | F | F |
| 0.0000694482072123 | 0.7553540690675504 | 0.4001848041313003 | T | T | T |
| 0.1666669999999968 | 0.8333330000000032 | 0.0514190000000028 | F | F | F |
| 0.1667015078718930 | 0.8333584699277995 | 0.3137098020375997 | T | T | T |
| 0.0834710014074318 | 0.9165659760268711 | 0.2263385868122939 | T | T | T |
| 0.2500000000000000 | 0.7500000000000000 | 0.1392870000000030 | F | F | F |
| 0.2491107223310575 | 0.7508910996071428 | 0.3994465905184131 | T | T | T |
| 0.4166669999999968 | 0.8333330000000032 | 0.0514190000000028 | F | F | F |
| 0.4172079956926045 | 0.8343929514139011 | 0.3148719915581619 | T | T | T |
| 0.3334758001454126 | 0.9167160771541903 | 0.2269053416361615 | T | T | T |
| 0.5000000000000000 | 0.7500000000000000 | 0.1392870000000030 | F | F | F |
| 0.5017855283684554 | 0.7508585015499362 | 0.3994532517332305 | T | T | T |

|                    |                    |                     |                     |   |   |   |
|--------------------|--------------------|---------------------|---------------------|---|---|---|
|                    | 0.6666669999999968 | 0.8333330000000032  | 0.0514190000000028  | F | F | F |
|                    | 0.6666654158089346 | 0.8333720297323918  | 0.3137271079889266  | T | T | T |
|                    | 0.5832638071561637 | 0.9167324372468677  | 0.2269028961544338  | T | T | T |
|                    | 0.7500000000000000 | 0.7500000000000000  | 0.1392870000000030  | F | F | F |
|                    | 0.7553474230430388 | 0.7553597387173431  | 0.4002090100049834  | T | T | T |
|                    | 0.9166669999999968 | 0.8333330000000032  | 0.0514190000000028  | F | F | F |
|                    | 0.9162374153208277 | 0.8324656420595374  | 0.3130883424383780  | T | T | T |
|                    | 0.8330933454777919 | 0.9165627976981101  | 0.2263444779366757  | T | T | T |
|                    | 0.4998652846475893 | -0.0002665692591350 | 0.4267251935049014  | T | T | T |
|                    | 0.0002736343999363 | 0.5001804527082281  | 0.4268306239113252  | T | T | T |
|                    | 0.4998992330137358 | 0.5001835487263034  | 0.4268248762963157  | T | T | T |
| <b>3Au/Ni(111)</b> | 1.0000000000000000 |                     |                     |   |   |   |
|                    | 8.6224000674449712 | -4.9781450000000014 | 0.0000000000000000  |   |   |   |
|                    | 0.0000000000000000 | 9.9562900000000010  | 0.0000000000000000  |   |   |   |
|                    | 0.0000000000000000 | 0.0000000000000000  | 23.1292800000000014 |   |   |   |
|                    | Ni                 | Au                  |                     |   |   |   |
|                    | 77                 | 3                   |                     |   |   |   |
|                    | Selective dynamics |                     |                     |   |   |   |
|                    | Direct             |                     |                     |   |   |   |
|                    | 0.0000000000000000 | 0.0000000000000000  | 0.1392870000000030  | F | F | F |
|                    | 0.0000197489266567 | 0.0000305057644952  | 0.4005823359049455  | T | T | T |
|                    | 0.1666669999999968 | 0.0833330000000032  | 0.0514190000000028  | F | F | F |
|                    | 0.1670761854444973 | 0.0835389758016944  | 0.3137085719942481  | T | T | T |
|                    | 0.0834243064922611 | 0.1668479612762070  | 0.2265318779637573  | T | T | T |
|                    | 0.2500000000000000 | 0.0000000000000000  | 0.1392870000000030  | F | F | F |
|                    | 0.2441187592154424 | -0.0000695690244915 | 0.4010796957640008  | T | T | T |
|                    | 0.4166669999999968 | 0.0833330000000032  | 0.0514190000000028  | F | F | F |
|                    | 0.4167523629998012 | 0.0832956014261790  | 0.3147731110907368  | T | T | T |
|                    | 0.3334285854025958 | 0.1667204149454794  | 0.2266997294201554  | T | T | T |
|                    | 0.5000000000000000 | 0.0000000000000000  | 0.1392870000000030  | F | F | F |
|                    | 0.6666669999999968 | 0.0833330000000032  | 0.0514190000000028  | F | F | F |
|                    | 0.6665467565029924 | 0.0833005705293995  | 0.3147761498466926  | T | T | T |
|                    | 0.5833777132259962 | 0.1667661811205007  | 0.2270767084248560  | T | T | T |
|                    | 0.7500000000000000 | 0.0000000000000000  | 0.1392870000000030  | F | F | F |
|                    | 0.7558061585111958 | -0.0000771991854522 | 0.4010853115537530  | T | T | T |
|                    | 0.9166669999999968 | 0.0833330000000032  | 0.0514190000000028  | F | F | F |
|                    | 0.9164720455255654 | 0.0835291310392273  | 0.3137079983126178  | T | T | T |
|                    | 0.8332893601904289 | 0.1667148829147802  | 0.2267022507135547  | T | T | T |
|                    | 0.0000000000000000 | 0.2500000000000000  | 0.1392870000000030  | F | F | F |
|                    | 0.0000698782870623 | 0.2442024879665190  | 0.4010769928838187  | T | T | T |
|                    | 0.1666669999999968 | 0.3333330000000032  | 0.0514190000000028  | F | F | F |
|                    | 0.1666537933174226 | 0.3332929961410289  | 0.3139001793384078  | T | T | T |
|                    | 0.0833258813142949 | 0.4167059791835925  | 0.2269133586184098  | T | T | T |
|                    | 0.2500000000000000 | 0.2500000000000000  | 0.1392870000000030  | F | F | F |
|                    | 0.2441447900134086 | 0.2442075938905595  | 0.4010777787793032  | T | T | T |
|                    | 0.4166669999999968 | 0.3333330000000032  | 0.0514190000000028  | F | F | F |
|                    | 0.4167832140250228 | 0.3335172789045483  | 0.3147678519011747  | T | T | T |
|                    | 0.3334029881647536 | 0.4167219080613548  | 0.2269101496415479  | T | T | T |
|                    | 0.5000000000000000 | 0.2500000000000000  | 0.1392870000000030  | F | F | F |
|                    | 0.4991223129400367 | 0.2495679687381337  | 0.4019136158806959  | T | T | T |
|                    | 0.6666669999999968 | 0.3333330000000032  | 0.0514190000000028  | F | F | F |

|                    |                     |                     |                     |   |   |
|--------------------|---------------------|---------------------|---------------------|---|---|
| 0.6666725673858035 | 0.3333386807004205  | 0.3145635095677722  | T                   | T | T |
| 0.5834028649632698 | 0.4166042913441702  | 0.2270738188290141  | T                   | T | T |
| 0.7500000000000000 | 0.2500000000000000  | 0.1392870000000030  | F                   | F | F |
| 0.7504333991981242 | 0.2495683211398871  | 0.4019188261499954  | T                   | T | T |
| 0.9166669999999968 | 0.3333330000000032  | 0.0514190000000028  | F                   | F | F |
| 0.9167459538704470 | 0.3335077520746149  | 0.3147721994723077  | T                   | T | T |
| 0.8331913107435384 | 0.4165861414393692  | 0.2270779575890907  | T                   | T | T |
| 0.0000000000000000 | 0.5000000000000000  | 0.1392870000000030  | F                   | F | F |
| 0.1666669999999968 | 0.5833330000000032  | 0.0514190000000028  | F                   | F | F |
| 0.1669273467527274 | 0.5834734757362515  | 0.3145896714662174  | T                   | T | T |
| 0.0833062823924379 | 0.6666078215064416  | 0.2269094641373540  | T                   | T | T |
| 0.2500000000000000 | 0.5000000000000000  | 0.1392870000000030  | F                   | F | F |
| 0.2491643011452312 | 0.4983252637737140  | 0.4013794915601467  | T                   | T | T |
| 0.4166669999999968 | 0.5833330000000032  | 0.0514190000000028  | F                   | F | F |
| 0.4165562877249627 | 0.5834694351764597  | 0.3145887059984531  | T                   | T | T |
| 0.3333305426903074 | 0.6666770060239215  | 0.2267635376328562  | T                   | T | T |
| 0.5000000000000000 | 0.5000000000000000  | 0.1392870000000030  | F                   | F | F |
| 0.6666669999999968 | 0.5833330000000032  | 0.0514190000000028  | F                   | F | F |
| 0.6665276977895960 | 0.5832463122299850  | 0.3147726978021801  | T                   | T | T |
| 0.5833111119784411 | 0.6666313620375770  | 0.2269127742523346  | T                   | T | T |
| 0.7500000000000000 | 0.5000000000000000  | 0.1392870000000030  | F                   | F | F |
| 0.7504298193071866 | 0.5008588156149804  | 0.4019084272972328  | T                   | T | T |
| 0.9166669999999968 | 0.5833330000000032  | 0.0514190000000028  | F                   | F | F |
| 0.9167290559261458 | 0.5832350841268981  | 0.3147721919649597  | T                   | T | T |
| 0.8332833367571110 | 0.6665738986298061  | 0.2266956028067581  | T                   | T | T |
| 0.0000000000000000 | 0.7500000000000000  | 0.1392870000000030  | F                   | F | F |
| 0.0000646973686104 | 0.7558814609865367  | 0.4010789337992510  | T                   | T | T |
| 0.1666669999999968 | 0.8333330000000032  | 0.0514190000000028  | F                   | F | F |
| 0.1666265458310016 | 0.8333523982201295  | 0.3139026434836715  | T                   | T | T |
| 0.0834206673172653 | 0.9165787211128862  | 0.2265269619080374  | T                   | T | T |
| 0.2500000000000000 | 0.7500000000000000  | 0.1392870000000030  | F                   | F | F |
| 0.2491527819557181 | 0.7508394943813294  | 0.4013759253727142  | T                   | T | T |
| 0.4166669999999968 | 0.8333330000000032  | 0.0514190000000028  | F                   | F | F |
| 0.4165695130474686 | 0.8331407750923875  | 0.3146021047814454  | T                   | T | T |
| 0.3333668596516606 | 0.9166591674071086  | 0.2269141085635633  | T                   | T | T |
| 0.5000000000000000 | 0.7500000000000000  | 0.1392870000000030  | F                   | F | F |
| 0.5016770248976506 | 0.7508437535894181  | 0.4013759634765209  | T                   | T | T |
| 0.6666669999999968 | 0.8333330000000032  | 0.0514190000000028  | F                   | F | F |
| 0.6667397927450809 | 0.8333685442648761  | 0.3139126892434811  | T                   | T | T |
| 0.5832878506697118 | 0.9166586701458784  | 0.2269173974612602  | T                   | T | T |
| 0.7500000000000000 | 0.7500000000000000  | 0.1392870000000030  | F                   | F | F |
| 0.7558253549436911 | 0.7558869343968073  | 0.4010794345339474  | T                   | T | T |
| 0.9166669999999968 | 0.8333330000000032  | 0.0514190000000028  | F                   | F | F |
| 0.9164766704789107 | 0.8329426574894866  | 0.3137077238656317  | T                   | T | T |
| 0.8331508030982384 | 0.9165771629399613  | 0.2265299484583251  | T                   | T | T |
| 0.4999365429481073 | -0.0001251791136093 | 0.4183904586526231  | T                   | T | T |
| 0.0001434643604973 | 0.5000746229009196  | 0.4183967544075756  | T                   | T | T |
| 0.4999422095026682 | 0.5000762892440255  | 0.4183953742957534  | T                   | T | T |
| <b>3Ni/Cu(111)</b> | 1.0000000000000000  |                     |                     |   |   |
|                    | 8.8905944857135406  | -5.1329871195825199 | -0.0000000000000010 |   |   |
|                    | 0.0000000000000000  | 10.2659742391650006 | 0.0000000000000010  |   |   |

0.0000000000000000 0.0000000000000000 23.3821328661704015

Ni Cu

3 77

Selective dynamics

Direct

|                     |                    |                    |   |   |   |
|---------------------|--------------------|--------------------|---|---|---|
| 0.2503283554902788  | 0.2501641777451430 | 0.3794700586603963 | T | T | T |
| 0.7498358222548569  | 0.2501641777451430 | 0.3794700586603963 | T | T | T |
| 0.7498358222548569  | 0.7496716445097211 | 0.3794700586603963 | T | T | T |
| 0.0000000000000000  | 0.0000000000000000 | 0.1155258754999977 | F | F | F |
| -0.0000497843033176 | 0.0000497843033175 | 0.3831097317326189 | T | T | T |
| 0.1666666667000030  | 0.0833333332999970 | 0.0259047434999999 | F | F | F |
| 0.1667005415388891  | 0.0837186102355600 | 0.2941450338539350 | T | T | T |
| 0.0831252213114602  | 0.1665626107057381 | 0.2047456245043671 | T | T | T |
| 0.2500000000000000  | 0.0000000000000000 | 0.1155258754999977 | F | F | F |
| 0.2500298855253219  | 0.0019311072473419 | 0.3831706475614562 | T | T | T |
| 0.4166666667000030  | 0.0833333332999970 | 0.0259047434999999 | F | F | F |
| 0.4167129421610440  | 0.0834258842220792 | 0.2943525974382475 | T | T | T |
| 0.3334440824856191  | 0.1665496762791837 | 0.2047800753431704 | T | T | T |
| 0.5000000000000000  | 0.0000000000000000 | 0.1155258754999977 | F | F | F |
| 0.5019012217220199  | 0.0019311072473419 | 0.3831706475614562 | T | T | T |
| 0.6666666667000030  | 0.0833333332999970 | 0.0259047434999999 | F | F | F |
| 0.6670180687966727  | 0.0837186102355600 | 0.2941450338539350 | T | T | T |
| 0.5831055936935555  | 0.1665496762791837 | 0.2047800753431704 | T | T | T |
| 0.7500000000000000  | 0.0000000000000000 | 0.1155258754999977 | F | F | F |
| 0.7500995686066282  | 0.0000497843033175 | 0.3831097317326189 | T | T | T |
| 0.9166666667000030  | 0.0833333332999970 | 0.0259047434999999 | F | F | F |
| 0.9166666667000030  | 0.0833333332999970 | 0.2941765175039666 | T | T | T |
| 0.8334373892942618  | 0.1665626107057381 | 0.2047456245043671 | T | T | T |
| 0.0000000000000000  | 0.2500000000000000 | 0.1155258754999977 | F | F | F |
| -0.0000497843033176 | 0.2499004313933720 | 0.3831097317326189 | T | T | T |
| 0.1666666667000030  | 0.3333333332999970 | 0.0259047434999999 | F | F | F |
| 0.1667005415388891  | 0.3329819312033273 | 0.2941450338539350 | T | T | T |
| 0.0833243689485500  | 0.4166487379971019 | 0.2050772422052570 | T | T | T |
| 0.2500000000000000  | 0.2500000000000000 | 0.1155258754999977 | F | F | F |
| 0.4166666667000030  | 0.3333333332999970 | 0.0259047434999999 | F | F | F |
| 0.4165143429601725  | 0.3332571714300819 | 0.2942199719381587 | T | T | T |
| 0.3334440824856191  | 0.4168944063064443 | 0.2047800753431704 | T | T | T |
| 0.5000000000000000  | 0.2500000000000000 | 0.1155258754999977 | F | F | F |
| 0.5002432424111972  | 0.2504864848223943 | 0.3832630645344138 | T | T | T |
| 0.6666666667000030  | 0.3333333332999970 | 0.0259047434999999 | F | F | F |
| 0.6667428285699181  | 0.3332571714300819 | 0.2942199719381587 | T | T | T |
| 0.5833333332999970  | 0.4166666667000030 | 0.2050834760805971 | T | T | T |
| 0.7500000000000000  | 0.2500000000000000 | 0.1155258754999977 | F | F | F |
| 0.9166666667000030  | 0.3333333332999970 | 0.0259047434999999 | F | F | F |
| 0.9162813897644398  | 0.3329819312033273 | 0.2941450338539350 | T | T | T |
| 0.8334503237208163  | 0.4168944063064443 | 0.2047800753431704 | T | T | T |
| 0.0000000000000000  | 0.5000000000000000 | 0.1155258754999977 | F | F | F |
| 0.9980688927526582  | 0.4980987782779800 | 0.3831706475614562 | T | T | T |
| 0.1666666667000030  | 0.5833333332999970 | 0.0259047434999999 | F | F | F |
| 0.1665611624000990  | 0.5831223247001963 | 0.2945300852964385 | T | T | T |
| 0.0832818227060763  | 0.6666409114030427 | 0.2051013294995641 | T | T | T |



|                    |                    |                     |                     |   |   |   |
|--------------------|--------------------|---------------------|---------------------|---|---|---|
|                    | 0.2500000000000000 | 0.5000000000000000  | 0.1155258754999977  | F | F | F |
|                    | 0.2500298855253219 | 0.4980987782779800  | 0.3831706475614562  | T | T | T |
|                    | 0.4166666667000030 | 0.5833333332999970  | 0.0259047434999999  | F | F | F |
|                    | 0.4167129421610440 | 0.5832870578389561  | 0.2943525974382475  | T | T | T |
|                    | 0.3333590885969573 | 0.6666409114030427  | 0.2051013294995641  | T | T | T |
|                    | 0.5000000000000000 | 0.5000000000000000  | 0.1155258754999977  | F | F | F |
|                    | 0.5002432424111972 | 0.4997567575888029  | 0.3832630645344138  | T | T | T |
|                    | 0.6666666667000030 | 0.5833333332999970  | 0.0259047434999999  | F | F | F |
|                    | 0.6667428285699181 | 0.5834856570398274  | 0.2942199719381587  | T | T | T |
|                    | 0.5831055936935555 | 0.6665559175143807  | 0.2047800753431704  | T | T | T |
|                    | 0.7500000000000000 | 0.5000000000000000  | 0.1155258754999977  | F | F | F |
|                    | 0.7495135151776059 | 0.4997567575888029  | 0.3832630645344138  | T | T | T |
|                    | 0.9166666667000030 | 0.5833333332999970  | 0.0259047434999999  | F | F | F |
|                    | 0.9165741157779209 | 0.5832870578389561  | 0.2943525974382475  | T | T | T |
|                    | 0.8334503237208163 | 0.6665559175143807  | 0.2047800753431704  | T | T | T |
|                    | 0.0000000000000000 | 0.7500000000000000  | 0.1155258754999977  | F | F | F |
|                    | 0.9980688927526582 | 0.7499701144746781  | 0.3831706475614562  | T | T | T |
|                    | 0.1666666667000030 | 0.8333333332999970  | 0.0259047434999999  | F | F | F |
|                    | 0.1665611624000990 | 0.8334388375999010  | 0.2945300852964385  | T | T | T |
|                    | 0.0833243689485500 | 0.9166756310514501  | 0.2050772422052570  | T | T | T |
|                    | 0.2500000000000000 | 0.7500000000000000  | 0.1155258754999977  | F | F | F |
|                    | 0.2500000000000000 | 0.7500000000000000  | 0.3829148699938958  | T | T | T |
|                    | 0.4166666667000030 | 0.8333333332999970  | 0.0259047434999999  | F | F | F |
|                    | 0.4168776752998038 | 0.8334388375999010  | 0.2945300852964385  | T | T | T |
|                    | 0.3333590885969573 | 0.9167181772939236  | 0.2051013294995641  | T | T | T |
|                    | 0.5000000000000000 | 0.7500000000000000  | 0.1155258754999977  | F | F | F |
|                    | 0.5019012217220199 | 0.7499701144746781  | 0.3831706475614562  | T | T | T |
|                    | 0.6666666667000030 | 0.8333333332999970  | 0.0259047434999999  | F | F | F |
|                    | 0.6670180687966727 | 0.8332994584611108  | 0.2941450338539350  | T | T | T |
|                    | 0.5833512620028981 | 0.9166756310514501  | 0.2050772422052570  | T | T | T |
|                    | 0.7500000000000000 | 0.7500000000000000  | 0.1155258754999977  | F | F | F |
|                    | 0.9166666667000030 | 0.8333333332999970  | 0.0259047434999999  | F | F | F |
|                    | 0.9162813897644398 | 0.8332994584611108  | 0.2941450338539350  | T | T | T |
|                    | 0.8334373892942618 | 0.9168747786885398  | 0.2047456245043671  | T | T | T |
| <b>3Pd/Cu(111)</b> | 1.0000000000000000 |                     |                     |   |   |   |
|                    | 8.8905944857135406 | -5.1329871195825199 | -0.0000000000000010 |   |   |   |
|                    | 0.0000000000000000 | 10.2659742391650006 | 0.0000000000000010  |   |   |   |
|                    | 0.0000000000000000 | 0.0000000000000000  | 23.3821328661704015 |   |   |   |
|                    | Pd Cu              |                     |                     |   |   |   |
|                    | 3 77               |                     |                     |   |   |   |
|                    | Selective dynamics |                     |                     |   |   |   |
|                    | Direct             |                     |                     |   |   |   |
|                    | 0.2500724824808321 | 0.2500362412404196  | 0.3864559310398177  | T | T | T |
|                    | 0.7499637587595804 | 0.2500362412404196  | 0.3864559310398177  | T | T | T |
|                    | 0.7499637587595804 | 0.7499275175191680  | 0.3864559310398177  | T | T | T |
|                    | 0.0000000000000000 | 0.0000000000000000  | 0.1155258754999977  | F | F | F |
|                    | 0.0004682453022572 | 0.9995317546977428  | 0.3839580119271725  | T | T | T |
|                    | 0.1666666667000030 | 0.0833333332999970  | 0.0259047434999999  | F | F | F |
|                    | 0.1665253008303561 | 0.0828290451355722  | 0.2940909959369945  | T | T | T |
|                    | 0.0830293743728773 | 0.1665146872364467  | 0.2049641242528912  | T | T | T |
|                    | 0.2500000000000000 | 0.0000000000000000  | 0.1155258754999977  | F | F | F |

|                    |                    |                    |   |   |   |
|--------------------|--------------------|--------------------|---|---|---|
| 0.2500316318545875 | 0.9965851348429671 | 0.3835390856607719 | T | T | T |
| 0.4166666667000030 | 0.083333332999970  | 0.0259047434999999 | F | F | F |
| 0.4167305599137760 | 0.0834611197275502 | 0.2944042250772039 | T | T | T |
| 0.3334056307467254 | 0.1665858787483858 | 0.2047922535410796 | T | T | T |
| 0.5000000000000000 | 0.0000000000000000 | 0.1155258754999977 | F | F | F |
| 0.4965535029883724 | 0.9965851348429671 | 0.3835390856607719 | T | T | T |
| 0.6666666667000030 | 0.083333332999970  | 0.0259047434999999 | F | F | F |
| 0.6663037444052249 | 0.0828290451355722 | 0.2940909959369945 | T | T | T |
| 0.5831802479016517 | 0.1665858787483858 | 0.2047922535410796 | T | T | T |
| 0.7500000000000000 | 0.0000000000000000 | 0.1155258754999977 | F | F | F |
| 0.7490635093954854 | 0.9995317546977428 | 0.3839580119271725 | T | T | T |
| 0.9166666667000030 | 0.083333332999970  | 0.0259047434999999 | F | F | F |
| 0.9166666667000030 | 0.083333332999970  | 0.2947459163947945 | T | T | T |
| 0.8334853127635534 | 0.1665146872364467 | 0.2049641242528912 | T | T | T |
| 0.0000000000000000 | 0.2500000000000000 | 0.1155258754999977 | F | F | F |
| 0.0004682453022572 | 0.2509364906045145 | 0.3839580119271725 | T | T | T |
| 0.1666666667000030 | 0.333333332999970  | 0.0259047434999999 | F | F | F |
| 0.1665253008303561 | 0.3336962555947751 | 0.2940909959369945 | T | T | T |
| 0.0831667634068415 | 0.4163335269136991 | 0.2050822283295567 | T | T | T |
| 0.2500000000000000 | 0.2500000000000000 | 0.1155258754999977 | F | F | F |
| 0.4166666667000030 | 0.333333332999970  | 0.0259047434999999 | F | F | F |
| 0.4170965516143063 | 0.3335482757571523 | 0.2940558366786583 | T | T | T |
| 0.3334056307467254 | 0.4168197520983484 | 0.2047922535410796 | T | T | T |
| 0.5000000000000000 | 0.2500000000000000 | 0.1155258754999977 | F | F | F |
| 0.4997046538996950 | 0.2494093077993901 | 0.3839599979096304 | T | T | T |
| 0.6666666667000030 | 0.333333332999970  | 0.0259047434999999 | F | F | F |
| 0.6664517242428477 | 0.3335482757571523 | 0.2940558366786583 | T | T | T |
| 0.583333332999970  | 0.4166666667000030 | 0.2052006196880597 | T | T | T |
| 0.7500000000000000 | 0.2500000000000000 | 0.1155258754999977 | F | F | F |
| 0.9166666667000030 | 0.333333332999970  | 0.0259047434999999 | F | F | F |
| 0.9171709548644279 | 0.3336962555947751 | 0.2940909959369945 | T | T | T |
| 0.8334141212516140 | 0.4168197520983484 | 0.2047922535410796 | T | T | T |
| 0.0000000000000000 | 0.5000000000000000 | 0.1155258754999977 | F | F | F |
| 0.0034148651570331 | 0.5034464970116277 | 0.3835390856607719 | T | T | T |
| 0.1666666667000030 | 0.583333332999970  | 0.0259047434999999 | F | F | F |
| 0.1667295101521390 | 0.5834590202042620 | 0.2940936357149928 | T | T | T |
| 0.0831095343558255 | 0.6665547672279136 | 0.2049730037922567 | T | T | T |
| 0.2500000000000000 | 0.5000000000000000 | 0.1155258754999977 | F | F | F |
| 0.2500316318545875 | 0.5034464970116277 | 0.3835390856607719 | T | T | T |
| 0.4166666667000030 | 0.583333332999970  | 0.0259047434999999 | F | F | F |
| 0.4167305599137760 | 0.5832694400862242 | 0.2944042250772039 | T | T | T |
| 0.3334452327720864 | 0.6665547672279136 | 0.2049730037922567 | T | T | T |
| 0.5000000000000000 | 0.5000000000000000 | 0.1155258754999977 | F | F | F |
| 0.4997046538996950 | 0.5002953461003050 | 0.3839599979096304 | T | T | T |
| 0.6666666667000030 | 0.583333332999970  | 0.0259047434999999 | F | F | F |
| 0.6664517242428477 | 0.5829034483856936 | 0.2940558366786583 | T | T | T |
| 0.5831802479016517 | 0.6665943692532746 | 0.2047922535410796 | T | T | T |
| 0.7500000000000000 | 0.5000000000000000 | 0.1155258754999977 | F | F | F |
| 0.7505906922006100 | 0.5002953461003050 | 0.3839599979096304 | T | T | T |
| 0.9166666667000030 | 0.583333332999970  | 0.0259047434999999 | F | F | F |
| 0.9165388802724498 | 0.5832694400862242 | 0.2944042250772039 | T | T | T |

|                    |                                                                |
|--------------------|----------------------------------------------------------------|
|                    | 0.8334141212516140 0.6665943692532746 0.2047922535410796 T T T |
|                    | 0.0000000000000000 0.7500000000000000 0.1155258754999977 F F F |
|                    | 0.0034148651570331 0.7499683681454126 0.3835390856607719 T T T |
|                    | 0.1666666667000030 0.8333333332999970 0.0259047434999999 F F F |
|                    | 0.1667295101521390 0.8332704898478610 0.2940936357149928 T T T |
|                    | 0.0831667634068415 0.9168332365931585 0.2050822283295567 T T T |
|                    | 0.2500000000000000 0.7500000000000000 0.1155258754999977 F F F |
|                    | 0.2500000000000000 0.7500000000000000 0.3828897891205418 T T T |
|                    | 0.4166666667000030 0.8333333332999970 0.0259047434999999 F F F |
|                    | 0.4165409797957380 0.8332704898478610 0.2940936357149928 T T T |
|                    | 0.3334452327720864 0.9168904656441745 0.2049730037922567 T T T |
|                    | 0.5000000000000000 0.7500000000000000 0.1155258754999977 F F F |
|                    | 0.4965535029883724 0.7499683681454126 0.3835390856607719 T T T |
|                    | 0.6666666667000030 0.8333333332999970 0.0259047434999999 F F F |
|                    | 0.6663037444052249 0.8334746991696438 0.2940909959369945 T T T |
|                    | 0.5836664730863009 0.9168332365931585 0.2050822283295567 T T T |
|                    | 0.7500000000000000 0.7500000000000000 0.1155258754999977 F F F |
|                    | 0.9166666667000030 0.8333333332999970 0.0259047434999999 F F F |
|                    | 0.9171709548644279 0.8334746991696438 0.2940909959369945 T T T |
|                    | 0.8334853127635534 0.9169706256271227 0.2049641242528912 T T T |
| <b>3Pt/Cu(111)</b> | 1.0000000000000000                                             |
|                    | 8.8905944857135406 -5.1329871195825199 -0.0000000000000010     |
|                    | 0.0000000000000000 10.2659742391650006 0.0000000000000010      |
|                    | 0.0000000000000000 0.0000000000000000 23.3821328661704015      |
|                    | Pt Cu                                                          |
|                    | 3 77                                                           |
|                    | Selective dynamics                                             |
|                    | Direct                                                         |
|                    | 0.2499493776084591 0.2499746888042296 0.3844447678874801 T T T |
|                    | 0.7500253111957704 0.2499746888042296 0.3844447678874801 T T T |
|                    | 0.7500253111957704 0.7500506223915409 0.3844447678874801 T T T |
|                    | 0.0000000000000000 0.0000000000000000 0.1155258754999977 F F F |
|                    | 0.0005437977761744 0.9994562022238256 0.3857867268065931 T T T |
|                    | 0.1666666667000030 0.0833333332999970 0.0259047434999999 F F F |
|                    | 0.1657504645061181 0.0817238472942776 0.2937477518614955 T T T |
|                    | 0.0829058056255860 0.1664529028628010 0.2048818171890119 T T T |
|                    | 0.2500000000000000 0.0000000000000000 0.1155258754999977 F F F |
|                    | 0.2500900272260935 0.9973974540751485 0.3842429596475228 T T T |
|                    | 0.4166666667000030 0.0833333332999970 0.0259047434999999 F F F |
|                    | 0.4165011782186809 0.0830023563373459 0.2944778631106715 T T T |
|                    | 0.3334323781655897 0.1664992381424426 0.2047900505805913 T T T |
|                    | 0.5000000000000000 0.0000000000000000 0.1155258754999977 F F F |
|                    | 0.4973074268490549 0.9973974540751485 0.3842429596475228 T T T |
|                    | 0.6666666667000030 0.0833333332999970 0.0259047434999999 F F F |
|                    | 0.6659733828881542 0.0817238472942776 0.2937477518614955 T T T |
|                    | 0.5830668598768440 0.1664992381424426 0.2047900505805913 T T T |
|                    | 0.7500000000000000 0.0000000000000000 0.1155258754999977 F F F |
|                    | 0.7489124044476512 0.9994562022238256 0.3857867268065931 T T T |
|                    | 0.9166666667000030 0.0833333332999970 0.0259047434999999 F F F |
|                    | 0.9166666667000030 0.0833333332999970 0.2949529930385282 T T T |
|                    | 0.8335470971371990 0.1664529028628010 0.2048818171890119 T T T |

|                    |                    |                    |       |
|--------------------|--------------------|--------------------|-------|
| 0.0000000000000000 | 0.2500000000000000 | 0.1155258754999977 | F F F |
| 0.0005437977761744 | 0.2510875955523488 | 0.3857867268065931 | T T T |
| 0.166666667000030  | 0.333333332999970  | 0.0259047434999999 | F F F |
| 0.1657504645061181 | 0.3340266171118458 | 0.2937477518614955 | T T T |
| 0.0832564242966285 | 0.4165128486932659 | 0.2050424094222763 | T T T |
| 0.2500000000000000 | 0.2500000000000000 | 0.1155258754999977 | F F F |
| 0.416666667000030  | 0.333333332999970  | 0.0259047434999999 | F F F |
| 0.4182678723777258 | 0.3341339361388620 | 0.2938461052600729 | T T T |
| 0.3334323781655897 | 0.4169331401231560 | 0.2047900505805913 | T T T |
| 0.5000000000000000 | 0.2500000000000000 | 0.1155258754999977 | F F F |
| 0.4997734268354250 | 0.2495468536708501 | 0.3857637875647768 | T T T |
| 0.666666667000030  | 0.333333332999970  | 0.0259047434999999 | F F F |
| 0.6658660638611380 | 0.3341339361388620 | 0.2938461052600729 | T T T |
| 0.583333332999970  | 0.416666667000030  | 0.2051152254755593 | T T T |
| 0.7500000000000000 | 0.2500000000000000 | 0.1155258754999977 | F F F |
| 0.916666667000030  | 0.333333332999970  | 0.0259047434999999 | F F F |
| 0.9182761527057224 | 0.3340266171118458 | 0.2937477518614955 | T T T |
| 0.8335007618575574 | 0.4169331401231560 | 0.2047900505805913 | T T T |
| 0.0000000000000000 | 0.5000000000000000 | 0.1155258754999977 | F F F |
| 0.0026025459248515 | 0.5026925731509451 | 0.3842429596475228 | T T T |
| 0.166666667000030  | 0.583333332999970  | 0.0259047434999999 | F F F |
| 0.1667132723476996 | 0.5834265445953974 | 0.2945095332787346 | T T T |
| 0.0833206486057350 | 0.6666603243528684 | 0.2050795807957400 | T T T |
| 0.2500000000000000 | 0.5000000000000000 | 0.1155258754999977 | F F F |
| 0.2500900272260935 | 0.5026925731509451 | 0.3842429596475228 | T T T |
| 0.416666667000030  | 0.583333332999970  | 0.0259047434999999 | F F F |
| 0.4165011782186809 | 0.5834988217813191 | 0.2944778631106715 | T T T |
| 0.3333396756471316 | 0.6666603243528684 | 0.2050795807957400 | T T T |
| 0.5000000000000000 | 0.5000000000000000 | 0.1155258754999977 | F F F |
| 0.4997734268354250 | 0.5002265731645750 | 0.3857637875647768 | T T T |
| 0.666666667000030  | 0.583333332999970  | 0.0259047434999999 | F F F |
| 0.6658660638611380 | 0.5817321276222742 | 0.2938461052600729 | T T T |
| 0.5830668598768440 | 0.6665676218344103 | 0.2047900505805913 | T T T |
| 0.7500000000000000 | 0.5000000000000000 | 0.1155258754999977 | F F F |
| 0.7504531463291499 | 0.5002265731645750 | 0.3857637875647768 | T T T |
| 0.916666667000030  | 0.583333332999970  | 0.0259047434999999 | F F F |
| 0.9169976436626541 | 0.5834988217813191 | 0.2944778631106715 | T T T |
| 0.8335007618575574 | 0.6665676218344103 | 0.2047900505805913 | T T T |
| 0.0000000000000000 | 0.7500000000000000 | 0.1155258754999977 | F F F |
| 0.0026025459248515 | 0.7499099727739065 | 0.3842429596475228 | T T T |
| 0.166666667000030  | 0.833333332999970  | 0.0259047434999999 | F F F |
| 0.1667132723476996 | 0.8332867276522933 | 0.2945095332787346 | T T T |
| 0.0832564242966285 | 0.9167435757033715 | 0.2050424094222763 | T T T |
| 0.2500000000000000 | 0.7500000000000000 | 0.1155258754999977 | F F F |
| 0.2500000000000000 | 0.7500000000000000 | 0.3828496532656160 | T T T |
| 0.416666667000030  | 0.833333332999970  | 0.0259047434999999 | F F F |
| 0.4165734554046026 | 0.8332867276522933 | 0.2945095332787346 | T T T |
| 0.3333396756471316 | 0.9166793513942650 | 0.2050795807957400 | T T T |
| 0.5000000000000000 | 0.7500000000000000 | 0.1155258754999977 | F F F |
| 0.4973074268490549 | 0.7499099727739065 | 0.3842429596475228 | T T T |
| 0.666666667000030  | 0.833333332999970  | 0.0259047434999999 | F F F |

|                    |                    |                     |                     |   |   |   |
|--------------------|--------------------|---------------------|---------------------|---|---|---|
|                    | 0.6659733828881542 | 0.8342495354938819  | 0.2937477518614955  | T | T | T |
|                    | 0.5834871513067341 | 0.9167435757033715  | 0.2050424094222763  | T | T | T |
|                    | 0.7500000000000000 | 0.7500000000000000  | 0.1155258754999977  | F | F | F |
|                    | 0.9166666667000030 | 0.833333332999970   | 0.0259047434999999  | F | F | F |
|                    | 0.9182761527057224 | 0.8342495354938819  | 0.2937477518614955  | T | T | T |
|                    | 0.8335470971371990 | 0.9170941943744140  | 0.2048818171890119  | T | T | T |
| <b>(6) 3X-PC</b>   |                    |                     |                     |   |   |   |
| <b>3Cu/Ni(111)</b> | 1.0000000000000000 |                     |                     |   |   |   |
|                    | 8.6224000674449712 | -4.9781450000000014 | 0.0000000000000000  |   |   |   |
|                    | 0.0000000000000000 | 9.9562900000000010  | 0.0000000000000000  |   |   |   |
|                    | 0.0000000000000000 | 0.0000000000000000  | 23.1292800000000014 |   |   |   |
|                    | Ni                 | Cu                  |                     |   |   |   |
|                    | 77                 | 3                   |                     |   |   |   |
|                    | Selective dynamics |                     |                     |   |   |   |
|                    | Direct             |                     |                     |   |   |   |
|                    | 0.0000000000000000 | 0.0000000000000000  | 0.1392870000000030  | F | F | F |
|                    | 0.0001021284029221 | 0.0001339421440321  | 0.4012091539824141  | T | T | T |
|                    | 0.1666669999999968 | 0.0833330000000032  | 0.0514190000000028  | F | F | F |
|                    | 0.1670526650752606 | 0.0836768196742028  | 0.3142238214666762  | T | T | T |
|                    | 0.0833614327521346 | 0.1666127649798455  | 0.2267663458005842  | T | T | T |
|                    | 0.2500000000000000 | 0.0000000000000000  | 0.1392870000000030  | F | F | F |
|                    | 0.2500409907192207 | 0.9999817835630935  | 0.4010612580711665  | T | T | T |
|                    | 0.4166669999999968 | 0.0833330000000032  | 0.0514190000000028  | F | F | F |
|                    | 0.4162962702235546 | 0.0833439851545208  | 0.3141764469058188  | T | T | T |
|                    | 0.3332843432736112 | 0.1666366759365587  | 0.2267013345240798  | T | T | T |
|                    | 0.5000000000000000 | 0.0000000000000000  | 0.1392870000000030  | F | F | F |
|                    | 0.5004351362332571 | 0.0023881065427815  | 0.4009091817151997  | T | T | T |
|                    | 0.6666669999999968 | 0.0833330000000032  | 0.0514190000000028  | F | F | F |
|                    | 0.6669376233367004 | 0.0831723423541320  | 0.3144179160763159  | T | T | T |
|                    | 0.5833318261357405 | 0.1666522534894881  | 0.2268090728620109  | T | T | T |
|                    | 0.7500000000000000 | 0.0000000000000000  | 0.1392870000000030  | F | F | F |
|                    | 0.7520176810384100 | 0.0024985854513204  | 0.4010478307373333  | T | T | T |
|                    | 0.9166669999999968 | 0.0833330000000032  | 0.0514190000000028  | F | F | F |
|                    | 0.9167894943155517 | 0.0832423705872500  | 0.3142056596018108  | T | T | T |
|                    | 0.8333612880204058 | 0.1666245767947601  | 0.2267217663380023  | T | T | T |
|                    | 0.0000000000000000 | 0.2500000000000000  | 0.1392870000000030  | F | F | F |
|                    | 0.9977118134431819 | 0.2481009679254385  | 0.4010845456782022  | T | T | T |
|                    | 0.1666669999999968 | 0.3333330000000032  | 0.0514190000000028  | F | F | F |
|                    | 0.1671592305872238 | 0.3338027664981595  | 0.3148673246145179  | T | T | T |
|                    | 0.0836408631501016 | 0.4165928715499163  | 0.2270158411631371  | T | T | T |
|                    | 0.2500000000000000 | 0.2500000000000000  | 0.1392870000000030  | F | F | F |
|                    | 0.2479894983890318 | 0.2455144220508956  | 0.4009684934026581  | T | T | T |
|                    | 0.4166669999999968 | 0.3333330000000032  | 0.0514190000000028  | F | F | F |
|                    | 0.4166795348594476 | 0.3338377069519680  | 0.3148167748557285  | T | T | T |
|                    | 0.3330893850421575 | 0.4165544421796383  | 0.2271195163297222  | T | T | T |
|                    | 0.5000000000000000 | 0.2500000000000000  | 0.1392870000000030  | F | F | F |
|                    | 0.5004470650204951 | 0.2480904813742768  | 0.4010359649828672  | T | T | T |
|                    | 0.6666669999999968 | 0.3333330000000032  | 0.0514190000000028  | F | F | F |
|                    | 0.6665848791581439 | 0.3334107948611233  | 0.3144035708079898  | T | T | T |
|                    | 0.5832533570892053 | 0.4166759071380142  | 0.2269920579556484  | T | T | T |
|                    | 0.7500000000000000 | 0.2500000000000000  | 0.1392870000000030  | F | F | F |

|                    |                    |                     |                     |   |   |   |
|--------------------|--------------------|---------------------|---------------------|---|---|---|
|                    | 0.7500220188514533 | 0.2500605106873621  | 0.4012146703105088  | T | T | T |
|                    | 0.9166669999999968 | 0.3333330000000032  | 0.0514190000000028  | F | F | F |
|                    | 0.9170651211825458 | 0.3332510403366982  | 0.3144647464859531  | T | T | T |
|                    | 0.8332293625115028 | 0.4165594208027272  | 0.2268368149943782  | T | T | T |
|                    | 0.0000000000000000 | 0.5000000000000000  | 0.1392870000000030  | F | F | F |
|                    | 0.9977494899451429 | 0.4997191924906446  | 0.4009430354616157  | T | T | T |
|                    | 0.1666669999999968 | 0.5833330000000032  | 0.0514190000000028  | F | F | F |
|                    | 0.1672986356733546 | 0.5832926229572877  | 0.3146821920112259  | T | T | T |
|                    | 0.0832373310335868 | 0.6666875720121510  | 0.2266835501471007  | T | T | T |
|                    | 0.2500000000000000 | 0.5000000000000000  | 0.1392870000000030  | F | F | F |
|                    | 0.4166669999999968 | 0.5833330000000032  | 0.0514190000000028  | F | F | F |
|                    | 0.4166366955244527 | 0.5833743889917855  | 0.3153389509145583  | T | T | T |
|                    | 0.3333325573875570 | 0.6666554298472391  | 0.2270992548471753  | T | T | T |
|                    | 0.5000000000000000 | 0.5000000000000000  | 0.1392870000000030  | F | F | F |
|                    | 0.6666669999999968 | 0.5833330000000032  | 0.0514190000000028  | F | F | F |
|                    | 0.6662523269247274 | 0.5834245944453187  | 0.3147743716334546  | T | T | T |
|                    | 0.5833971513754932 | 0.6668322023467823  | 0.2270693000120687  | T | T | T |
|                    | 0.7500000000000000 | 0.5000000000000000  | 0.1392870000000030  | F | F | F |
|                    | 0.7520758232373339 | 0.4997056235511010  | 0.4010227383744365  | T | T | T |
|                    | 0.9166669999999968 | 0.5833330000000032  | 0.0514190000000028  | F | F | F |
|                    | 0.9167419980884119 | 0.5838006269360960  | 0.3141965262214086  | T | T | T |
|                    | 0.8333587071766928 | 0.6667087647968941  | 0.2266858590605096  | T | T | T |
|                    | 0.0000000000000000 | 0.7500000000000000  | 0.1392870000000030  | F | F | F |
|                    | 0.0000728174911444 | 0.7500936155297921  | 0.4010544200734358  | T | T | T |
|                    | 0.1666669999999968 | 0.8333330000000032  | 0.0514190000000028  | F | F | F |
|                    | 0.1667706339963502 | 0.8333097887231986  | 0.3139258105128135  | T | T | T |
|                    | 0.0833594831914226 | 0.9166546846284618  | 0.2268785912584264  | T | T | T |
|                    | 0.2500000000000000 | 0.7500000000000000  | 0.1392870000000030  | F | F | F |
|                    | 0.2476317246815114 | 0.7524068134994337  | 0.4007086638128428  | T | T | T |
|                    | 0.4166669999999968 | 0.8333330000000032  | 0.0514190000000028  | F | F | F |
|                    | 0.4167824096133401 | 0.8327649631651397  | 0.3147004473588311  | T | T | T |
|                    | 0.3331592768064482 | 0.9166017080609876  | 0.2266828970694874  | T | T | T |
|                    | 0.5000000000000000 | 0.7500000000000000  | 0.1392870000000030  | F | F | F |
|                    | 0.6666669999999968 | 0.8333330000000032  | 0.0514190000000028  | F | F | F |
|                    | 0.6662984521625006 | 0.8329907484261128  | 0.3148578387334879  | T | T | T |
|                    | 0.5832317984781170 | 0.9162254148959121  | 0.2269800229280392  | T | T | T |
|                    | 0.7500000000000000 | 0.7500000000000000  | 0.1392870000000030  | F | F | F |
|                    | 0.7546864890380078 | 0.7522767054088462  | 0.4009225548194379  | T | T | T |
|                    | 0.9166669999999968 | 0.8333330000000032  | 0.0514190000000028  | F | F | F |
|                    | 0.9164349288222056 | 0.8330751084867600  | 0.3141832053022284  | T | T | T |
|                    | 0.8333423773652413 | 0.9166121964128919  | 0.2267388876750047  | T | T | T |
|                    | 0.5011313871617915 | 0.7523092512681160  | 0.4059009225751780  | T | T | T |
|                    | 0.2477917723538567 | 0.4990041148585362  | 0.4058925128798165  | T | T | T |
|                    | 0.5012367004088318 | 0.4989867650444779  | 0.4058877664980187  | T | T | T |
| <b>3Ag/Ni(111)</b> | 1.0000000000000000 |                     |                     |   |   |   |
|                    | 8.6224000674449712 | -4.9781450000000014 | 0.0000000000000000  |   |   |   |
|                    | 0.0000000000000000 | 9.9562900000000010  | 0.0000000000000000  |   |   |   |
|                    | 0.0000000000000000 | 0.0000000000000000  | 23.1292800000000014 |   |   |   |
|                    | Ni                 | Ag                  |                     |   |   |   |
|                    | 77                 | 3                   |                     |   |   |   |
|                    | Selective dynamics |                     |                     |   |   |   |

| Direct             |                    |                    |       |
|--------------------|--------------------|--------------------|-------|
| 0.0000000000000000 | 0.0000000000000000 | 0.1392870000000030 | F F F |
| 0.0002565524006428 | 0.9997547098189230 | 0.3998455714181830 | T T T |
| 0.1666669999999968 | 0.0833330000000032 | 0.0514190000000028 | F F F |
| 0.1671483929933828 | 0.0840987705681187 | 0.3130149361319141 | T T T |
| 0.0839478046837883 | 0.1676459836433821 | 0.2264666392503472 | T T T |
| 0.2500000000000000 | 0.0000000000000000 | 0.1392870000000030 | F F F |
| 0.2491192221077725 | 0.9997073276087534 | 0.3998375323839127 | T T T |
| 0.4166669999999968 | 0.0833330000000032 | 0.0514190000000028 | F F F |
| 0.4154040145805666 | 0.0832883075494308 | 0.3127252497208346 | T T T |
| 0.3335910153711623 | 0.1675157584191496 | 0.2263793026167278 | T T T |
| 0.5000000000000000 | 0.0000000000000000 | 0.1392870000000030 | F F F |
| 0.5005113270023287 | 0.0077614219692421 | 0.3997910615753213 | T T T |
| 0.6666669999999968 | 0.0833330000000032 | 0.0514190000000028 | F F F |
| 0.6668379606791248 | 0.0831171313909636 | 0.3139162215236411 | T T T |
| 0.5834573096611280 | 0.1666745860187859 | 0.2263731740453281 | T T T |
| 0.7500000000000000 | 0.0000000000000000 | 0.1392870000000030 | F F F |
| 0.7570650053101531 | 0.0076917978963991 | 0.3998975125808002 | T T T |
| 0.9166669999999968 | 0.0833330000000032 | 0.0514190000000028 | F F F |
| 0.9169987166938753 | 0.0829953612244481 | 0.3127361147014369 | T T T |
| 0.8333073818722383 | 0.1667186401373755 | 0.2262348934568763 | T T T |
| 0.0000000000000000 | 0.2500000000000000 | 0.1392870000000030 | F F F |
| 0.9923760185835917 | 0.2430697184232642 | 0.3998932430429605 | T T T |
| 0.1666669999999968 | 0.3333330000000032 | 0.0514190000000028 | F F F |
| 0.1679387903838361 | 0.3349123952425188 | 0.3158803926430949 | T T T |
| 0.0842116011168201 | 0.4169001767568403 | 0.2272460274074604 | T T T |
| 0.2500000000000000 | 0.2500000000000000 | 0.1392870000000030 | F F F |
| 0.2440027989433560 | 0.2379776791080417 | 0.4009581772355233 | T T T |
| 0.4166669999999968 | 0.3333330000000032 | 0.0514190000000028 | F F F |
| 0.4171539793199486 | 0.3353454899420925 | 0.3158497479450944 | T T T |
| 0.3336092498585614 | 0.4176335221096821 | 0.2279796099423805 | T T T |
| 0.5000000000000000 | 0.2500000000000000 | 0.1392870000000030 | F F F |
| 0.5007986834300624 | 0.2429171383698190 | 0.3998100508049163 | T T T |
| 0.6666669999999968 | 0.3333330000000032 | 0.0514190000000028 | F F F |
| 0.6665870101628713 | 0.3334162867386112 | 0.3136250525624504 | T T T |
| 0.5830520319371288 | 0.4169489359393808 | 0.2271681854645564 | T T T |
| 0.7500000000000000 | 0.2500000000000000 | 0.1392870000000030 | F F F |
| 0.7499974676584245 | 0.2500083482721323 | 0.4010813393722330 | T T T |
| 0.9166669999999968 | 0.3333330000000032 | 0.0514190000000028 | F F F |
| 0.9168996798758542 | 0.3332053558711081 | 0.3139055363464820 | T T T |
| 0.8333171680448359 | 0.4165604634161895 | 0.2263599471862747 | T T T |
| 0.0000000000000000 | 0.5000000000000000 | 0.1392870000000030 | F F F |
| 0.9922709948908164 | 0.4995091649045946 | 0.3997968567344117 | T T T |
| 0.1666669999999968 | 0.5833330000000032 | 0.0514190000000028 | F F F |
| 0.1677655984058433 | 0.5830662191725295 | 0.3157627893706874 | T T T |
| 0.0837877910224805 | 0.6663793957234176 | 0.2264655209436128 | T T T |
| 0.2500000000000000 | 0.5000000000000000 | 0.1392870000000030 | F F F |
| 0.4166669999999968 | 0.5833330000000032 | 0.0514190000000028 | F F F |
| 0.4163941693554634 | 0.5836544850415564 | 0.3184713091093201 | T T T |
| 0.3336043157918809 | 0.6664176487401434 | 0.2280848225719510 | T T T |
| 0.5000000000000000 | 0.5000000000000000 | 0.1392870000000030 | F F F |

|                    |                    |                     |                     |   |   |   |
|--------------------|--------------------|---------------------|---------------------|---|---|---|
|                    | 0.6666669999999968 | 0.5833330000000032  | 0.0514190000000028  | F | F | F |
|                    | 0.6647776128110863 | 0.5829422956342825  | 0.3158304239463021  | T | T | T |
|                    | 0.5824122253433828 | 0.6664063842472601  | 0.2279712661058042  | T | T | T |
|                    | 0.7500000000000000 | 0.5000000000000000  | 0.1392870000000030  | F | F | F |
|                    | 0.7570946827703295 | 0.4992263097289893  | 0.3998006455216441  | T | T | T |
|                    | 0.9166669999999968 | 0.5833330000000032  | 0.0514190000000028  | F | F | F |
|                    | 0.9167488931764680 | 0.5845886867212684  | 0.3127275772009028  | T | T | T |
|                    | 0.8325009640346295 | 0.6663804221668954  | 0.2263838476939171  | T | T | T |
|                    | 0.0000000000000000 | 0.7500000000000000  | 0.1392870000000030  | F | F | F |
|                    | 0.0003356564190966 | 0.7509464047033987  | 0.3998385906752304  | T | T | T |
|                    | 0.1666669999999968 | 0.8333330000000032  | 0.0514190000000028  | F | F | F |
|                    | 0.1667978205595730 | 0.8332638662624845  | 0.3128609487643814  | T | T | T |
|                    | 0.0833314968496026 | 0.9166811624756903  | 0.2262832412711830  | T | T | T |
|                    | 0.2500000000000000 | 0.7500000000000000  | 0.1392870000000030  | F | F | F |
|                    | 0.2439701004381973 | 0.7560722318800543  | 0.4008432276498226  | T | T | T |
|                    | 0.4166669999999968 | 0.8333330000000032  | 0.0514190000000028  | F | F | F |
|                    | 0.4169729208118511 | 0.8322498914021281  | 0.3157566302972654  | T | T | T |
|                    | 0.3336564749178592 | 0.9162470168923349  | 0.2264529138134250  | T | T | T |
|                    | 0.5000000000000000 | 0.7500000000000000  | 0.1392870000000030  | F | F | F |
|                    | 0.6666669999999968 | 0.8333330000000032  | 0.0514190000000028  | F | F | F |
|                    | 0.6650860505987382 | 0.8320543457210334  | 0.3158673569243362  | T | T | T |
|                    | 0.5831255998192688 | 0.9157964625109969  | 0.2272453265617642  | T | T | T |
|                    | 0.7500000000000000 | 0.7500000000000000  | 0.1392870000000030  | F | F | F |
|                    | 0.7620498399367648 | 0.7560004218312102  | 0.4009474141892682  | T | T | T |
|                    | 0.9166669999999968 | 0.8333330000000032  | 0.0514190000000028  | F | F | F |
|                    | 0.9159837991397808 | 0.8329015679250560  | 0.3130153706218977  | T | T | T |
|                    | 0.8323489286639258 | 0.9160782782758758  | 0.2264657066060138  | T | T | T |
|                    | 0.5068730321223498 | 0.7637155172933561  | 0.4245757148262754  | T | T | T |
|                    | 0.2363439795440030 | 0.4931930266605065  | 0.4245800954795840  | T | T | T |
|                    | 0.5069005813194067 | 0.4931266147208078  | 0.4247171373825225  | T | T | T |
| <b>3Au/Ni(111)</b> | 1.0000000000000000 |                     |                     |   |   |   |
|                    | 8.6224000674449712 | -4.9781450000000014 | 0.0000000000000000  |   |   |   |
|                    | 0.0000000000000000 | 9.9562900000000010  | 0.0000000000000000  |   |   |   |
|                    | 0.0000000000000000 | 0.0000000000000000  | 23.1292800000000014 |   |   |   |
|                    | Ni                 | Au                  |                     |   |   |   |
|                    | 77                 | 3                   |                     |   |   |   |
|                    | Selective dynamics |                     |                     |   |   |   |
|                    | Direct             |                     |                     |   |   |   |
|                    | 0.0000000000000000 | 0.0000000000000000  | 0.1392870000000030  | F | F | F |
|                    | 0.0003985341731507 | 0.9995978565921746  | 0.4000383488199688  | T | T | T |
|                    | 0.1666669999999968 | 0.0833330000000032  | 0.0514190000000028  | F | F | F |
|                    | 0.1669922961274537 | 0.0839723465770561  | 0.3135504239445623  | T | T | T |
|                    | 0.0836559220091075 | 0.1672173864301172  | 0.2266635176775438  | T | T | T |
|                    | 0.2500000000000000 | 0.0000000000000000  | 0.1392870000000030  | F | F | F |
|                    | 0.2486894501871930 | 0.9995385911100243  | 0.4001231375443055  | T | T | T |
|                    | 0.4166669999999968 | 0.0833330000000032  | 0.0514190000000028  | F | F | F |
|                    | 0.4155937687685025 | 0.0831219237215493  | 0.3131945749481915  | T | T | T |
|                    | 0.3334558630564075 | 0.1670107581091429  | 0.2263715919764309  | T | T | T |
|                    | 0.5000000000000000 | 0.0000000000000000  | 0.1392870000000030  | F | F | F |
|                    | 0.5003230866621067 | 0.0079790181396504  | 0.4007415162169679  | T | T | T |
|                    | 0.6666669999999968 | 0.0833330000000032  | 0.0514190000000028  | F | F | F |



|                    |                    |                    |   |   |   |
|--------------------|--------------------|--------------------|---|---|---|
| 0.6669253519832026 | 0.0836255382202395 | 0.3140370592101718 | T | T | T |
| 0.5834272663821096 | 0.1666178174584871 | 0.2264267698756157 | T | T | T |
| 0.7500000000000000 | 0.0000000000000000 | 0.1392870000000030 | F | F | F |
| 0.7573402592875667 | 0.0080257183599244 | 0.4008736864474116 | T | T | T |
| 0.9166669999999968 | 0.0833330000000032 | 0.0514190000000028 | F | F | F |
| 0.9167513378030705 | 0.0832638277635667 | 0.3133347934306059 | T | T | T |
| 0.8333154275469710 | 0.1667091480865182 | 0.2263071459680432 | T | T | T |
| 0.0000000000000000 | 0.2500000000000000 | 0.1392870000000030 | F | F | F |
| 0.9919970041119655 | 0.2426757345171850 | 0.4008723447576443 | T | T | T |
| 0.1666669999999968 | 0.3333330000000032 | 0.0514190000000028 | F | F | F |
| 0.1668070158398365 | 0.3335583930653812 | 0.3154242323333420 | T | T | T |
| 0.0840229237980807 | 0.4168230348142146 | 0.2272320461027917 | T | T | T |
| 0.2500000000000000 | 0.2500000000000000 | 0.1392870000000030 | F | F | F |
| 0.2446470379984973 | 0.2391127043977690 | 0.4019956522417516 | T | T | T |
| 0.4166669999999968 | 0.3333330000000032 | 0.0514190000000028 | F | F | F |
| 0.4167032149966019 | 0.3337282621560433 | 0.3150751710541897 | T | T | T |
| 0.3332494116678859 | 0.4170867851047646 | 0.2276737588372200 | T | T | T |
| 0.5000000000000000 | 0.2500000000000000 | 0.1392870000000030 | F | F | F |
| 0.5004941417720943 | 0.2426786299277950 | 0.4006086128480177 | T | T | T |
| 0.6666669999999968 | 0.3333330000000032 | 0.0514190000000028 | F | F | F |
| 0.6666254506292262 | 0.3333229152865158 | 0.3136584713331629 | T | T | T |
| 0.5831529554774875 | 0.4168347687414169 | 0.2269800046116686 | T | T | T |
| 0.7500000000000000 | 0.2500000000000000 | 0.1392870000000030 | F | F | F |
| 0.7498187305673767 | 0.2502135784708841 | 0.4009367273037796 | T | T | T |
| 0.9166669999999968 | 0.3333330000000032 | 0.0514190000000028 | F | F | F |
| 0.9163292564975407 | 0.3330489223995698 | 0.3140538610423391 | T | T | T |
| 0.8333821032111572 | 0.4165649387812635 | 0.2264423844737138 | T | T | T |
| 0.0000000000000000 | 0.5000000000000000 | 0.1392870000000030 | F | F | F |
| 0.9920503878573896 | 0.4997208228576966 | 0.4007368392876529 | T | T | T |
| 0.1666669999999968 | 0.5833330000000032 | 0.0514190000000028 | F | F | F |
| 0.1669609569714439 | 0.5833646314164724 | 0.3152938762059421 | T | T | T |
| 0.0837711463883153 | 0.6665661351955450 | 0.2265794417584033 | T | T | T |
| 0.2500000000000000 | 0.5000000000000000 | 0.1392870000000030 | F | F | F |
| 0.4166669999999968 | 0.5833330000000032 | 0.0514190000000028 | F | F | F |
| 0.4166850796675519 | 0.5833637031212859 | 0.3168639016715176 | T | T | T |
| 0.3336295785478427 | 0.6664101826231388 | 0.2279144851369921 | T | T | T |
| 0.5000000000000000 | 0.5000000000000000 | 0.1392870000000030 | F | F | F |
| 0.6666669999999968 | 0.5833330000000032 | 0.0514190000000028 | F | F | F |
| 0.6662333822563582 | 0.5833182826808638 | 0.3150900973984960 | T | T | T |
| 0.5829676294853812 | 0.6667699308474369 | 0.2276836183496798 | T | T | T |
| 0.7500000000000000 | 0.5000000000000000 | 0.1392870000000030 | F | F | F |
| 0.7573595114930214 | 0.4995655546507507 | 0.4006100601325571 | T | T | T |
| 0.9166669999999968 | 0.5833330000000032 | 0.0514190000000028 | F | F | F |
| 0.9168677381180075 | 0.5843598143321529 | 0.3131986543506287 | T | T | T |
| 0.8329924783531126 | 0.6665407091388147 | 0.2263747451978233 | T | T | T |
| 0.0000000000000000 | 0.7500000000000000 | 0.1392870000000030 | F | F | F |
| 0.0004568517588410 | 0.7513417710071693 | 0.4001245040998711 | T | T | T |
| 0.1666669999999968 | 0.8333330000000032 | 0.0514190000000028 | F | F | F |
| 0.1667947608026310 | 0.8332161647234955 | 0.3135147478618805 | T | T | T |
| 0.0833882568381981 | 0.9166266665536256 | 0.2264886537224911 | T | T | T |
| 0.2500000000000000 | 0.7500000000000000 | 0.1392870000000030 | F | F | F |

|                    |                    |                     |                     |   |   |   |
|--------------------|--------------------|---------------------|---------------------|---|---|---|
|                    | 0.2443693944398433 | 0.7555947127907885  | 0.4020834220356164  | T | T | T |
|                    | 0.4166669999999968 | 0.8333330000000032  | 0.0514190000000028  | F | F | F |
|                    | 0.4166365064367739 | 0.8330682547884720  | 0.3153026422402121  | T | T | T |
|                    | 0.3334462487051653 | 0.9162423115388805  | 0.2265847949314264  | T | T | T |
|                    | 0.5000000000000000 | 0.7500000000000000  | 0.1392870000000030  | F | F | F |
|                    | 0.6666669999999968 | 0.8333330000000032  | 0.0514190000000028  | F | F | F |
|                    | 0.6664570515700845 | 0.8332376187589645  | 0.3154192693537681  | T | T | T |
|                    | 0.5831668474404310 | 0.9159571571831435  | 0.2272295580918566  | T | T | T |
|                    | 0.7500000000000000 | 0.7500000000000000  | 0.1392870000000030  | F | F | F |
|                    | 0.7608567589636621 | 0.7553863708108466  | 0.4019807067720222  | T | T | T |
|                    | 0.9166669999999968 | 0.8333330000000032  | 0.0514190000000028  | F | F | F |
|                    | 0.9160012766585410 | 0.8329827108877907  | 0.3135447421708903  | T | T | T |
|                    | 0.8328212535550747 | 0.9163622129854190  | 0.2266611977890065  | T | T | T |
|                    | 0.5073201210312632 | 0.7648657746178813  | 0.4208942738573640  | T | T | T |
|                    | 0.2351530216454236 | 0.4926824628714854  | 0.4208968888781470  | T | T | T |
|                    | 0.5072719740639968 | 0.4927469627614300  | 0.4207229095687453  | T | T | T |
| <b>3Ni/Cu(111)</b> | 1.0000000000000000 |                     |                     |   |   |   |
|                    | 8.8905944857135406 | -5.1329871195825199 | -0.0000000000000010 |   |   |   |
|                    | 0.0000000000000000 | 10.2659742391650006 | 0.0000000000000010  |   |   |   |
|                    | 0.0000000000000000 | 0.0000000000000000  | 23.3821328661704015 |   |   |   |
|                    | Ni                 | Cu                  |                     |   |   |   |
|                    | 3                  | 77                  |                     |   |   |   |
|                    | Selective dynamics |                     |                     |   |   |   |
|                    | Direct             |                     |                     |   |   |   |
|                    | 0.2547086412390556 | 0.5023543206195313  | 0.3795340836406638  | T | T | T |
|                    | 0.4976456793804687 | 0.5023543206195313  | 0.3795340836406638  | T | T | T |
|                    | 0.4976456793804687 | 0.7452913587609444  | 0.3795340836406638  | T | T | T |
|                    | 0.0000000000000000 | 0.0000000000000000  | 0.1155258754999977  | F | F | F |
|                    | 0.9998056775174291 | 0.0001943224825709  | 0.3832283182817449  | T | T | T |
|                    | 0.1666666667000030 | 0.0833333332999970  | 0.0259047434999999  | F | F | F |
|                    | 0.1669594655295583 | 0.0839189309591077  | 0.2946386798133034  | T | T | T |
|                    | 0.0833047848561819 | 0.1667087366007536  | 0.2050932915893142  | T | T | T |
|                    | 0.2500000000000000 | 0.0000000000000000  | 0.1155258754999977  | F | F | F |
|                    | 0.2503886449651418 | 0.0001943224825709  | 0.3832283182817449  | T | T | T |
|                    | 0.4166666667000030 | 0.0833333332999970  | 0.0259047434999999  | F | F | F |
|                    | 0.4169887568994426 | 0.0834943783997133  | 0.2946419963990152  | T | T | T |
|                    | 0.3334039516445628 | 0.1667087366007536  | 0.2050932915893142  | T | T | T |
|                    | 0.5000000000000000 | 0.0000000000000000  | 0.1155258754999977  | F | F | F |
|                    | 0.4996280501835741 | 0.9971969552411224  | 0.3831885774262673  | T | T | T |
|                    | 0.6666666667000030 | 0.0833333332999970  | 0.0259047434999999  | F | F | F |
|                    | 0.6666066183437138 | 0.0832132365874187  | 0.2943544265351292  | T | T | T |
|                    | 0.5833316760498803 | 0.1666658380749482  | 0.2050476995477624  | T | T | T |
|                    | 0.7500000000000000 | 0.0000000000000000  | 0.1155258754999977  | F | F | F |
|                    | 0.7475689050575482 | 0.9971969552411224  | 0.3831885774262673  | T | T | T |
|                    | 0.9166666667000030 | 0.0833333332999970  | 0.0259047434999999  | F | F | F |
|                    | 0.9165056216002867 | 0.0834943783997133  | 0.2946419963990152  | T | T | T |
|                    | 0.8333341619250518 | 0.1666658380749482  | 0.2050476995477624  | T | T | T |
|                    | 0.0000000000000000 | 0.2500000000000000  | 0.1155258754999977  | F | F | F |
|                    | 0.0028030447588776 | 0.2524310949424518  | 0.3831885774262673  | T | T | T |
|                    | 0.1666666667000030 | 0.3333333332999970  | 0.0259047434999999  | F | F | F |
|                    | 0.1671535093871626 | 0.3340404958535501  | 0.2940871745757576  | T | T | T |

|                    |                    |                    |   |   |   |
|--------------------|--------------------|--------------------|---|---|---|
| 0.0831574057273485 | 0.4165787029136752 | 0.2047174909737564 | T | T | T |
| 0.2500000000000000 | 0.2500000000000000 | 0.1155258754999977 | F | F | F |
| 0.2520501626822806 | 0.2541003253645542 | 0.3834293441024528 | T | T | T |
| 0.4166666667000030 | 0.333333332999970  | 0.0259047434999999 | F | F | F |
| 0.4168869865663964 | 0.3340404958535501 | 0.2940871745757576 | T | T | T |
| 0.3331897443945095 | 0.4163794888890138 | 0.2043502906290300 | T | T | T |
| 0.5000000000000000 | 0.2500000000000000 | 0.1155258754999977 | F | F | F |
| 0.4996280501835741 | 0.2524310949424518 | 0.3831885774262673 | T | T | T |
| 0.6666666667000030 | 0.333333332999970  | 0.0259047434999999 | F | F | F |
| 0.6666066183437138 | 0.3333933816562862 | 0.2943544265351292 | T | T | T |
| 0.5834212970863248 | 0.4165787029136752 | 0.2047174909737564 | T | T | T |
| 0.7500000000000000 | 0.2500000000000000 | 0.1155258754999977 | F | F | F |
| 0.7500000000000000 | 0.2500000000000000 | 0.3829465008137447 | T | T | T |
| 0.9166666667000030 | 0.333333332999970  | 0.0259047434999999 | F | F | F |
| 0.9167867634125813 | 0.3333933816562862 | 0.2943544265351292 | T | T | T |
| 0.8333341619250518 | 0.4166683239501197 | 0.2050476995477624 | T | T | T |
| 0.0000000000000000 | 0.5000000000000000 | 0.1155258754999977 | F | F | F |
| 0.0028030447588776 | 0.5003719498164259 | 0.3831885774262673 | T | T | T |
| 0.1666666667000030 | 0.583333332999970  | 0.0259047434999999 | F | F | F |
| 0.1671535093871626 | 0.5831130134336036 | 0.2940871745757576 | T | T | T |
| 0.0833047848561819 | 0.6665960483554372 | 0.2050932915893142 | T | T | T |
| 0.2500000000000000 | 0.5000000000000000 | 0.1155258754999977 | F | F | F |
| 0.4166666667000030 | 0.583333332999970  | 0.0259047434999999 | F | F | F |
| 0.4166666667000030 | 0.583333332999970  | 0.2930874609559808 | T | T | T |
| 0.3331897443945095 | 0.6668102556054905 | 0.2043502906290300 | T | T | T |
| 0.5000000000000000 | 0.5000000000000000 | 0.1155258754999977 | F | F | F |
| 0.6666666667000030 | 0.583333332999970  | 0.0259047434999999 | F | F | F |
| 0.6659595041464499 | 0.5831130134336036 | 0.2940871745757576 | T | T | T |
| 0.5836205111109862 | 0.6668102556054905 | 0.2043502906290300 | T | T | T |
| 0.7500000000000000 | 0.5000000000000000 | 0.1155258754999977 | F | F | F |
| 0.7475689050575482 | 0.5003719498164259 | 0.3831885774262673 | T | T | T |
| 0.9166666667000030 | 0.583333332999970  | 0.0259047434999999 | F | F | F |
| 0.9165056216002867 | 0.5830112431005574 | 0.2946419963990152 | T | T | T |
| 0.8332912633992464 | 0.6665960483554372 | 0.2050932915893142 | T | T | T |
| 0.0000000000000000 | 0.7500000000000000 | 0.1155258754999977 | F | F | F |
| 0.9998056775174291 | 0.7496113550348582 | 0.3832283182817449 | T | T | T |
| 0.1666666667000030 | 0.833333332999970  | 0.0259047434999999 | F | F | F |
| 0.1669594655295583 | 0.8330405344704417 | 0.2946386798133034 | T | T | T |
| 0.083333332999970  | 0.9166666667000030 | 0.2051115948682209 | T | T | T |
| 0.2500000000000000 | 0.7500000000000000 | 0.1155258754999977 | F | F | F |
| 0.2520501626822806 | 0.7479498373177194 | 0.3834293441024528 | T | T | T |
| 0.4166666667000030 | 0.833333332999970  | 0.0259047434999999 | F | F | F |
| 0.4168869865663964 | 0.8328464906128374 | 0.2940871745757576 | T | T | T |
| 0.3334039516445628 | 0.9166952151438181 | 0.2050932915893142 | T | T | T |
| 0.5000000000000000 | 0.7500000000000000 | 0.1155258754999977 | F | F | F |
| 0.6666666667000030 | 0.833333332999970  | 0.0259047434999999 | F | F | F |
| 0.6659595041464499 | 0.8328464906128374 | 0.2940871745757576 | T | T | T |
| 0.5834212970863248 | 0.9168425942726586 | 0.2047174909737564 | T | T | T |
| 0.7500000000000000 | 0.7500000000000000 | 0.1155258754999977 | F | F | F |
| 0.7458996746354458 | 0.7479498373177194 | 0.3834293441024528 | T | T | T |
| 0.9166666667000030 | 0.833333332999970  | 0.0259047434999999 | F | F | F |

|                    |                                                                |
|--------------------|----------------------------------------------------------------|
|                    | 0.9160810690408923 0.8330405344704417 0.2946386798133034 T T T |
|                    | 0.8332912633992464 0.9166952151438181 0.2050932915893142 T T T |
| <b>3Pd/Cu(111)</b> | 1.0000000000000000                                             |
|                    | 8.8905944857135406 -5.1329871195825199 -0.0000000000000010     |
|                    | 0.0000000000000000 10.2659742391650006 0.0000000000000010      |
|                    | 0.0000000000000000 0.0000000000000000 23.3821328661704015      |
|                    | Pd Cu                                                          |
|                    | 3 77                                                           |
|                    | Selective dynamics                                             |
|                    | Direct                                                         |
|                    | 0.2408236731265418 0.4954118365632709 0.3876173292063569 T T T |
|                    | 0.5045881634367291 0.4954118365632709 0.3876173292063569 T T T |
|                    | 0.5045881634367291 0.7591763268734582 0.3876173292063569 T T T |
|                    | 0.0000000000000000 0.0000000000000000 0.1155258754999977 F F F |
|                    | 0.0004455892534452 0.9995544107465548 0.3827079028632170 T T T |
|                    | 0.1666666667000030 0.083333332999970 0.0259047434999999 F F F  |
|                    | 0.1666341130159523 0.0832682259318958 0.2937155609596189 T T T |
|                    | 0.0835558426157732 0.1672491600934904 0.2048794491479242 T T T |
|                    | 0.2500000000000000 0.0000000000000000 0.1155258754999977 F F F |
|                    | 0.2491088214931096 0.9995544107465548 0.3827079028632170 T T T |
|                    | 0.4166666667000030 0.083333332999970 0.0259047434999999 F F F  |
|                    | 0.4167280579492072 0.0833640289246063 0.2938331878279996 T T T |
|                    | 0.3336933173777084 0.1672491600934904 0.2048794491479242 T T T |
|                    | 0.5000000000000000 0.0000000000000000 0.1155258754999977 F F F |
|                    | 0.5000363227467943 0.0045863447487093 0.3834692659667027 T T T |
|                    | 0.6666666667000030 0.083333332999970 0.0259047434999999 F F F  |
|                    | 0.6665809781888612 0.0831619562777064 0.2942502560997795 T T T |
|                    | 0.5835664324181380 0.1667832162590770 0.2049122763829132 T T T |
|                    | 0.7500000000000000 0.0000000000000000 0.1155258754999977 F F F |
|                    | 0.7545500220019150 0.0045863447487093 0.3834692659667027 T T T |
|                    | 0.9166666667000030 0.083333332999970 0.0259047434999999 F F F  |
|                    | 0.9166359710753937 0.0833640289246063 0.2938331878279996 T T T |
|                    | 0.8332167837409230 0.1667832162590770 0.2049122763829132 T T T |
|                    | 0.0000000000000000 0.2500000000000000 0.1155258754999977 F F F |
|                    | 0.9954136552512907 0.2454499779980850 0.3834692659667027 T T T |
|                    | 0.1666666667000030 0.333333332999970 0.0259047434999999 F F F  |
|                    | 0.1665198565902770 0.3327972715407910 0.2942805336160816 T T T |
|                    | 0.0833804491925605 0.4166902246462882 0.2048845706749418 T T T |
|                    | 0.2500000000000000 0.2500000000000000 0.1155258754999977 F F F |
|                    | 0.2467217706387359 0.2434435412774718 0.3839515087819692 T T T |
|                    | 0.4166666667000030 0.333333332999970 0.0259047434999999 F F F  |
|                    | 0.4162774150505157 0.3327972715407910 0.2942805336160816 T T T |
|                    | 0.3335608330772644 0.4171216662545234 0.2049705977125100 T T T |
|                    | 0.5000000000000000 0.2500000000000000 0.1155258754999977 F F F |
|                    | 0.5000363227467943 0.2454499779980850 0.3834692659667027 T T T |
|                    | 0.6666666667000030 0.333333332999970 0.0259047434999999 F F F  |
|                    | 0.6665809781888612 0.3334190218111388 0.2942502560997795 T T T |
|                    | 0.5833097753537118 0.4166902246462882 0.2048845706749418 T T T |
|                    | 0.7500000000000000 0.2500000000000000 0.1155258754999977 F F F |
|                    | 0.7500000000000000 0.2500000000000000 0.3829186554056321 T T T |
|                    | 0.9166666667000030 0.333333332999970 0.0259047434999999 F F F  |

|                    |                    |                     |                     |   |   |   |
|--------------------|--------------------|---------------------|---------------------|---|---|---|
|                    | 0.9168380437222936 | 0.3334190218111388  | 0.2942502560997795  | T | T | T |
|                    | 0.8332167837409230 | 0.4164335675818620  | 0.2049122763829132  | T | T | T |
|                    | 0.0000000000000000 | 0.5000000000000000  | 0.1155258754999977  | F | F | F |
|                    | 0.9954136552512907 | 0.4999636772532057  | 0.3834692659667027  | T | T | T |
|                    | 0.1666666667000030 | 0.583333332999970   | 0.0259047434999999  | F | F | F |
|                    | 0.1665198565902770 | 0.5837225849494843  | 0.2942805336160816  | T | T | T |
|                    | 0.0835558426157732 | 0.6663066826222916  | 0.2048794491479242  | T | T | T |
|                    | 0.2500000000000000 | 0.5000000000000000  | 0.1155258754999977  | F | F | F |
|                    | 0.4166666667000030 | 0.583333332999970   | 0.0259047434999999  | F | F | F |
|                    | 0.4166666667000030 | 0.583333332999970   | 0.2953080993956192  | T | T | T |
|                    | 0.3335608330772644 | 0.6664391669227356  | 0.2049705977125100  | T | T | T |
|                    | 0.5000000000000000 | 0.5000000000000000  | 0.1155258754999977  | F | F | F |
|                    | 0.6666666667000030 | 0.583333332999970   | 0.0259047434999999  | F | F | F |
|                    | 0.6672027284592090 | 0.5837225849494843  | 0.2942805336160816  | T | T | T |
|                    | 0.5828783337454766 | 0.6664391669227356  | 0.2049705977125100  | T | T | T |
|                    | 0.7500000000000000 | 0.5000000000000000  | 0.1155258754999977  | F | F | F |
|                    | 0.7545500220019150 | 0.4999636772532057  | 0.3834692659667027  | T | T | T |
|                    | 0.9166666667000030 | 0.583333332999970   | 0.0259047434999999  | F | F | F |
|                    | 0.9166359710753937 | 0.5832719420507928  | 0.2938331878279996  | T | T | T |
|                    | 0.8327508399065096 | 0.6663066826222916  | 0.2048794491479242  | T | T | T |
|                    | 0.0000000000000000 | 0.7500000000000000  | 0.1155258754999977  | F | F | F |
|                    | 0.0004455892534452 | 0.7508911785068904  | 0.3827079028632170  | T | T | T |
|                    | 0.1666666667000030 | 0.833333332999970   | 0.0259047434999999  | F | F | F |
|                    | 0.1666341130159523 | 0.8333658869840477  | 0.2937155609596189  | T | T | T |
|                    | 0.083333332999970  | 0.9166666667000030  | 0.2044883805471116  | T | T | T |
|                    | 0.2500000000000000 | 0.7500000000000000  | 0.1155258754999977  | F | F | F |
|                    | 0.2467217706387359 | 0.7532782293612641  | 0.3839515087819692  | T | T | T |
|                    | 0.4166666667000030 | 0.833333332999970   | 0.0259047434999999  | F | F | F |
|                    | 0.4162774150505157 | 0.8334801434097230  | 0.2942805336160816  | T | T | T |
|                    | 0.3336933173777084 | 0.9164441573842268  | 0.2048794491479242  | T | T | T |
|                    | 0.5000000000000000 | 0.7500000000000000  | 0.1155258754999977  | F | F | F |
|                    | 0.6666666667000030 | 0.833333332999970   | 0.0259047434999999  | F | F | F |
|                    | 0.6672027284592090 | 0.8334801434097230  | 0.2942805336160816  | T | T | T |
|                    | 0.5833097753537118 | 0.9166195508074395  | 0.2048845706749418  | T | T | T |
|                    | 0.7500000000000000 | 0.7500000000000000  | 0.1155258754999977  | F | F | F |
|                    | 0.7565564587225282 | 0.7532782293612641  | 0.3839515087819692  | T | T | T |
|                    | 0.9166666667000030 | 0.833333332999970   | 0.0259047434999999  | F | F | F |
|                    | 0.9167317740681042 | 0.8333658869840477  | 0.2937155609596189  | T | T | T |
|                    | 0.8327508399065096 | 0.9164441573842268  | 0.2048794491479242  | T | T | T |
| <b>3Pt/Cu(111)</b> | 1.0000000000000000 |                     |                     |   |   |   |
|                    | 8.8905944857135406 | -5.1329871195825199 | -0.0000000000000010 |   |   |   |
|                    | 0.0000000000000000 | 10.2659742391650006 | 0.0000000000000010  |   |   |   |
|                    | 0.0000000000000000 | 0.0000000000000000  | 23.3821328661704015 |   |   |   |
|                    | Pt                 | Cu                  |                     |   |   |   |
|                    | 3                  | 77                  |                     |   |   |   |
|                    | Selective dynamics |                     |                     |   |   |   |
|                    | Direct             |                     |                     |   |   |   |
|                    | 0.2417084444191815 | 0.4958542222095943  | 0.3858836208477143  | T | T | T |
|                    | 0.5041457777904057 | 0.4958542222095943  | 0.3858836208477143  | T | T | T |
|                    | 0.5041457777904057 | 0.7582915555808185  | 0.3858836208477143  | T | T | T |
|                    | 0.0000000000000000 | 0.0000000000000000  | 0.1155258754999977  | F | F | F |

|                    |                    |                    |   |   |   |
|--------------------|--------------------|--------------------|---|---|---|
| 0.0003495950638595 | 0.9996504049361405 | 0.3831805313465537 | T | T | T |
| 0.1666666667000030 | 0.0833333332999970 | 0.0259047434999999 | F | F | F |
| 0.1666385349424431 | 0.0832770697848773 | 0.2942366176721833 | T | T | T |
| 0.0833395526197904 | 0.1668817479324289 | 0.2049762493755978 | T | T | T |
| 0.2500000000000000 | 0.0000000000000000 | 0.1155258754999977 | F | F | F |
| 0.2493008098722882 | 0.9996504049361405 | 0.3831805313465537 | T | T | T |
| 0.4166666667000030 | 0.0833333332999970 | 0.0259047434999999 | F | F | F |
| 0.4169078476654278 | 0.0834539237827059 | 0.2944965166100886 | T | T | T |
| 0.3335421952126296 | 0.1668817479324289 | 0.2049762493755978 | T | T | T |
| 0.5000000000000000 | 0.0000000000000000 | 0.1155258754999977 | F | F | F |
| 0.5001198478445588 | 0.0039050545474595 | 0.3843591354639386 | T | T | T |
| 0.6666666667000030 | 0.0833333332999970 | 0.0259047434999999 | F | F | F |
| 0.6668590905497993 | 0.0837181809995897 | 0.2944215313647405 | T | T | T |
| 0.5833866678536310 | 0.1666933339768164 | 0.2050883303033402 | T | T | T |
| 0.7500000000000000 | 0.0000000000000000 | 0.1155258754999977 | F | F | F |
| 0.7537852067029007 | 0.0039050545474595 | 0.3843591354639386 | T | T | T |
| 0.9166666667000030 | 0.0833333332999970 | 0.0259047434999999 | F | F | F |
| 0.9165460762172941 | 0.0834539237827059 | 0.2944965166100886 | T | T | T |
| 0.8333066660231836 | 0.1666933339768164 | 0.2050883303033402 | T | T | T |
| 0.0000000000000000 | 0.2500000000000000 | 0.1155258754999977 | F | F | F |
| 0.9960949454525405 | 0.2462147932970993 | 0.3843591354639386 | T | T | T |
| 0.1666666667000030 | 0.3333333332999970 | 0.0259047434999999 | F | F | F |
| 0.1652417242045630 | 0.3314256911644335 | 0.2937008265998102 | T | T | T |
| 0.0829495039923529 | 0.4164747520461844 | 0.2046996572192299 | T | T | T |
| 0.2500000000000000 | 0.2500000000000000 | 0.1155258754999977 | F | F | F |
| 0.2473446260228513 | 0.2446892520457027 | 0.3850726408319218 | T | T | T |
| 0.4166666667000030 | 0.3333333332999970 | 0.0259047434999999 | F | F | F |
| 0.4161839670598724 | 0.3314256911644335 | 0.2937008265998102 | T | T | T |
| 0.3333755560057341 | 0.4167511121114771 | 0.2046363889470584 | T | T | T |
| 0.5000000000000000 | 0.2500000000000000 | 0.1155258754999977 | F | F | F |
| 0.5001198478445588 | 0.2462147932970993 | 0.3843591354639386 | T | T | T |
| 0.6666666667000030 | 0.3333333332999970 | 0.0259047434999999 | F | F | F |
| 0.6668590905497993 | 0.3331409094502007 | 0.2944215313647405 | T | T | T |
| 0.5835252479538156 | 0.4164747520461844 | 0.2046996572192299 | T | T | T |
| 0.7500000000000000 | 0.2500000000000000 | 0.1155258754999977 | F | F | F |
| 0.7500000000000000 | 0.2500000000000000 | 0.3830040866563067 | T | T | T |
| 0.9166666667000030 | 0.3333333332999970 | 0.0259047434999999 | F | F | F |
| 0.9162818190004103 | 0.3331409094502007 | 0.2944215313647405 | T | T | T |
| 0.8333066660231836 | 0.4166133321463690 | 0.2050883303033402 | T | T | T |
| 0.0000000000000000 | 0.5000000000000000 | 0.1155258754999977 | F | F | F |
| 0.9960949454525405 | 0.4998801521554412 | 0.3843591354639386 | T | T | T |
| 0.1666666667000030 | 0.5833333332999970 | 0.0259047434999999 | F | F | F |
| 0.1652417242045630 | 0.5838160329401276 | 0.2937008265998102 | T | T | T |
| 0.0833395526197904 | 0.6664578047873704 | 0.2049762493755978 | T | T | T |
| 0.2500000000000000 | 0.5000000000000000 | 0.1155258754999977 | F | F | F |
| 0.4166666667000030 | 0.5833333332999970 | 0.0259047434999999 | F | F | F |
| 0.4166666667000030 | 0.5833333332999970 | 0.2935718713073499 | T | T | T |
| 0.3333755560057341 | 0.6666244439942659 | 0.2046363889470584 | T | T | T |
| 0.5000000000000000 | 0.5000000000000000 | 0.1155258754999977 | F | F | F |
| 0.6666666667000030 | 0.5833333332999970 | 0.0259047434999999 | F | F | F |
| 0.6685743088355665 | 0.5838160329401276 | 0.2937008265998102 | T | T | T |

|                    |                    |                     |                     |   |   |   |
|--------------------|--------------------|---------------------|---------------------|---|---|---|
|                    | 0.5832488878885229 | 0.6666244439942659  | 0.2046363889470584  | T | T | T |
|                    | 0.7500000000000000 | 0.5000000000000000  | 0.1155258754999977  | F | F | F |
|                    | 0.7537852067029007 | 0.4998801521554412  | 0.3843591354639386  | T | T | T |
|                    | 0.9166666667000030 | 0.5833333332999970  | 0.0259047434999999  | F | F | F |
|                    | 0.9165460762172941 | 0.5830921523345722  | 0.2944965166100886  | T | T | T |
|                    | 0.8331182520675711 | 0.6664578047873704  | 0.2049762493755978  | T | T | T |
|                    | 0.0000000000000000 | 0.7500000000000000  | 0.1155258754999977  | F | F | F |
|                    | 0.0003495950638595 | 0.7506991901277118  | 0.3831805313465537  | T | T | T |
|                    | 0.1666666667000030 | 0.8333333332999970  | 0.0259047434999999  | F | F | F |
|                    | 0.1666385349424431 | 0.8333614650575569  | 0.2942366176721833  | T | T | T |
|                    | 0.0833333332999970 | 0.9166666667000030  | 0.2048415932289558  | T | T | T |
|                    | 0.2500000000000000 | 0.7500000000000000  | 0.1155258754999977  | F | F | F |
|                    | 0.2473446260228513 | 0.7526553739771487  | 0.3850726408319218  | T | T | T |
|                    | 0.4166666667000030 | 0.8333333332999970  | 0.0259047434999999  | F | F | F |
|                    | 0.4161839670598724 | 0.8347582757954370  | 0.2937008265998102  | T | T | T |
|                    | 0.3335421952126296 | 0.9166604473802096  | 0.2049762493755978  | T | T | T |
|                    | 0.5000000000000000 | 0.7500000000000000  | 0.1155258754999977  | F | F | F |
|                    | 0.6666666667000030 | 0.8333333332999970  | 0.0259047434999999  | F | F | F |
|                    | 0.6685743088355665 | 0.8347582757954370  | 0.2937008265998102  | T | T | T |
|                    | 0.5835252479538156 | 0.9170504960076471  | 0.2046996572192299  | T | T | T |
|                    | 0.7500000000000000 | 0.7500000000000000  | 0.1155258754999977  | F | F | F |
|                    | 0.7553107479542973 | 0.7526553739771487  | 0.3850726408319218  | T | T | T |
|                    | 0.9166666667000030 | 0.8333333332999970  | 0.0259047434999999  | F | F | F |
|                    | 0.9167229302151227 | 0.8333614650575569  | 0.2942366176721833  | T | T | T |
|                    | 0.8331182520675711 | 0.9166604473802096  | 0.2049762493755978  | T | T | T |
| <b>(7) 3X-PL</b>   |                    |                     |                     |   |   |   |
| <b>3Cu/Ni(111)</b> | 1.0000000000000000 |                     |                     |   |   |   |
|                    | 8.6224000674449712 | -4.9781450000000014 | 0.0000000000000000  |   |   |   |
|                    | 0.0000000000000000 | 9.9562900000000010  | 0.0000000000000000  |   |   |   |
|                    | 0.0000000000000000 | 0.0000000000000000  | 23.1292800000000014 |   |   |   |
|                    | Ni                 | Cu                  |                     |   |   |   |
|                    | 77                 | 3                   |                     |   |   |   |
|                    | Selective dynamics |                     |                     |   |   |   |
|                    | Direct             |                     |                     |   |   |   |
|                    | 0.0000000000000000 | 0.0000000000000000  | 0.1392870000000030  | F | F | F |
|                    | 0.1666669999999968 | 0.0833330000000032  | 0.0514190000000028  | F | F | F |
|                    | 0.1669470494017489 | 0.0833005257258392  | 0.3150406065789042  | T | T | T |
|                    | 0.0836542898631265 | 0.1669910747296299  | 0.2272063652793648  | T | T | T |
|                    | 0.2500000000000000 | 0.0000000000000000  | 0.1392870000000030  | F | F | F |
|                    | 0.2525263189304709 | 0.9973359874165624  | 0.4008219316366848  | T | T | T |
|                    | 0.4166669999999968 | 0.0833330000000032  | 0.0514190000000028  | F | F | F |
|                    | 0.4163789078194426 | 0.0836246285408322  | 0.3142647559328680  | T | T | T |
|                    | 0.3332981060482894 | 0.1666803681179445  | 0.2267817498104918  | T | T | T |
|                    | 0.5000000000000000 | 0.0000000000000000  | 0.1392870000000030  | F | F | F |
|                    | 0.5003815483314042 | 0.9996061492058672  | 0.4012743648806065  | T | T | T |
|                    | 0.6666669999999968 | 0.0833330000000032  | 0.0514190000000028  | F | F | F |
|                    | 0.6671207711658624 | 0.0836239806997341  | 0.3143228545337635  | T | T | T |
|                    | 0.5833363779864840 | 0.1669206101616254  | 0.2268339584201726  | T | T | T |
|                    | 0.7500000000000000 | 0.0000000000000000  | 0.1392870000000030  | F | F | F |
|                    | 0.7480535786793041 | 0.9998910956595140  | 0.4010839439468867  | T | T | T |
|                    | 0.9166669999999968 | 0.0833330000000032  | 0.0514190000000028  | F | F | F |

|                    |                    |                    |   |   |   |
|--------------------|--------------------|--------------------|---|---|---|
| 0.9173531387902969 | 0.0833253048271345 | 0.3149216935675767 | T | T | T |
| 0.8333573172403845 | 0.1667126790312921 | 0.2266719289736372 | T | T | T |
| 0.0000000000000000 | 0.2500000000000000 | 0.1392870000000030 | F | F | F |
| 0.9973388901811049 | 0.2520901354197349 | 0.4010072291914284 | T | T | T |
| 0.1666669999999968 | 0.3333330000000032 | 0.0514190000000028 | F | F | F |
| 0.1670788411643898 | 0.3329641262578917 | 0.3150839811026316 | T | T | T |
| 0.0834507784474994 | 0.4165472399337773 | 0.2267767766947841 | T | T | T |
| 0.2500000000000000 | 0.2500000000000000 | 0.1392870000000030 | F | F | F |
| 0.4166669999999968 | 0.3333330000000032 | 0.0514190000000028 | F | F | F |
| 0.4167190595815171 | 0.3330754729267653 | 0.3150410650817790 | T | T | T |
| 0.3330112738525983 | 0.4163692640361631 | 0.2272047516100599 | T | T | T |
| 0.5000000000000000 | 0.2500000000000000 | 0.1392870000000030 | F | F | F |
| 0.5026491205305703 | 0.2474815132558774 | 0.4008098087470984 | T | T | T |
| 0.6666669999999968 | 0.3333330000000032 | 0.0514190000000028 | F | F | F |
| 0.6665885703485372 | 0.3336628002306128 | 0.3141898613385194 | T | T | T |
| 0.5835003434710586 | 0.4169605253235318 | 0.2268795767219487 | T | T | T |
| 0.7500000000000000 | 0.2500000000000000 | 0.1392870000000030 | F | F | F |
| 0.7500903406128856 | 0.2499795630501822 | 0.4011309839582964 | T | T | T |
| 0.9166669999999968 | 0.3333330000000032 | 0.0514190000000028 | F | F | F |
| 0.9166567427739309 | 0.3330824143362534 | 0.3141926165642914 | T | T | T |
| 0.8332799745924362 | 0.4166584138882001 | 0.2268582551986569 | T | T | T |
| 0.0000000000000000 | 0.5000000000000000 | 0.1392870000000030 | F | F | F |
| 0.9997566916991829 | 0.5002851784039493 | 0.4012096116164301 | T | T | T |
| 0.1666669999999968 | 0.5833330000000032 | 0.0514190000000028 | F | F | F |
| 0.1668890141312716 | 0.5833721087642516 | 0.3141829721719560 | T | T | T |
| 0.0833004235576027 | 0.6666873694916475 | 0.2268546601099786 | T | T | T |
| 0.2500000000000000 | 0.5000000000000000 | 0.1392870000000030 | F | F | F |
| 0.2479604803162587 | 0.5027142279751899 | 0.4010078350545356 | T | T | T |
| 0.4166669999999968 | 0.5833330000000032 | 0.0514190000000028 | F | F | F |
| 0.4166924238911704 | 0.5826625352226031 | 0.3149237423257460 | T | T | T |
| 0.3332613503429585 | 0.6666057930764850 | 0.2266721054740160 | T | T | T |
| 0.5000000000000000 | 0.5000000000000000 | 0.1392870000000030 | F | F | F |
| 0.6666669999999968 | 0.5833330000000032 | 0.0514190000000028 | F | F | F |
| 0.6663527378895964 | 0.5832767887807293 | 0.3147094028725022 | T | T | T |
| 0.5832226439791910 | 0.6667315984218547 | 0.2269877043605106 | T | T | T |
| 0.7500000000000000 | 0.5000000000000000 | 0.1392870000000030 | F | F | F |
| 0.7518482777396613 | 0.4997709335270173 | 0.4008627840822214 | T | T | T |
| 0.9166669999999968 | 0.5833330000000032 | 0.0514190000000028 | F | F | F |
| 0.9162173758101133 | 0.5837922633627315 | 0.3142173471340044 | T | T | T |
| 0.8333298292387852 | 0.6666993508156480 | 0.2266126662792800 | T | T | T |
| 0.0000000000000000 | 0.7500000000000000 | 0.1392870000000030 | F | F | F |
| 0.0002508696804924 | 0.7481818922411847 | 0.4008527699334294 | T | T | T |
| 0.1666669999999968 | 0.8333330000000032 | 0.0514190000000028 | F | F | F |
| 0.1663281371374765 | 0.8333978816919583 | 0.3141820207587713 | T | T | T |
| 0.0830538181358023 | 0.9165097576979306 | 0.2268803070698766 | T | T | T |
| 0.2500000000000000 | 0.7500000000000000 | 0.1392870000000030 | F | F | F |
| 0.2500454276353139 | 0.7499365667768672 | 0.4011239737155989 | T | T | T |
| 0.4166669999999968 | 0.8333330000000032 | 0.0514190000000028 | F | F | F |
| 0.4163613448397072 | 0.8328296844914220 | 0.3143069870510757 | T | T | T |
| 0.3330886364555781 | 0.9166699431636900 | 0.2268347066561702 | T | T | T |
| 0.5000000000000000 | 0.7500000000000000 | 0.1392870000000030 | F | F | F |



|                    |                    |                     |                     |   |   |   |
|--------------------|--------------------|---------------------|---------------------|---|---|---|
|                    | 0.5001260507730052 | 0.7519857698129044  | 0.4010859570134855  | T | T | T |
|                    | 0.6666669999999968 | 0.8333330000000032  | 0.0514190000000028  | F | F | F |
|                    | 0.6666867721670826 | 0.8332904368909766  | 0.3145241115039212  | T | T | T |
|                    | 0.5833598971823193 | 0.9166439733474192  | 0.2268028856930542  | T | T | T |
|                    | 0.7500000000000000 | 0.7500000000000000  | 0.1392870000000030  | F | F | F |
|                    | 0.7497673126992268 | 0.7501979086055499  | 0.4009513454502454  | T | T | T |
|                    | 0.9166669999999968 | 0.8333330000000032  | 0.0514190000000028  | F | F | F |
|                    | 0.9166919326189813 | 0.8336360447026863  | 0.3147184086042287  | T | T | T |
|                    | 0.8332876578045898 | 0.9167984630721051  | 0.2269931960472391  | T | T | T |
|                    | 0.2500068368782493 | 0.2499936984317657  | 0.4059240416525398  | T | T | T |
|                    | 0.9995772277059558 | 0.9994578823222966  | 0.4060832335357389  | T | T | T |
|                    | 0.5005535376547101 | 0.5004210833144853  | 0.4060852391338017  | T | T | T |
| <b>3Ag/Ni(111)</b> | 1.0000000000000000 |                     |                     |   |   |   |
|                    | 8.6224000674449712 | -4.9781450000000014 | 0.0000000000000000  |   |   |   |
|                    | 0.0000000000000000 | 9.9562900000000010  | 0.0000000000000000  |   |   |   |
|                    | 0.0000000000000000 | 0.0000000000000000  | 23.1292800000000014 |   |   |   |
|                    | Ni                 | Ag                  |                     |   |   |   |
|                    | 77                 | 3                   |                     |   |   |   |
|                    | Selective dynamics |                     |                     |   |   |   |
|                    | Direct             |                     |                     |   |   |   |
|                    | 0.0000000000000000 | 0.0000000000000000  | 0.1392870000000030  | F | F | F |
|                    | 0.9999882925412749 | 0.9999735462739565  | 0.4000206543036740  | T | T | T |
|                    | 0.1666669999999968 | 0.0833330000000032  | 0.0514190000000028  | F | F | F |
|                    | 0.1667937327693068 | 0.0834228731419486  | 0.3133579136052234  | T | T | T |
|                    | 0.0836664640248586 | 0.1673364362388909  | 0.2266768825287500  | T | T | T |
|                    | 0.2500000000000000 | 0.0000000000000000  | 0.1392870000000030  | F | F | F |
|                    | 0.2503074746569283 | 0.0007614362579531  | 0.4005698693307309  | T | T | T |
|                    | 0.4166669999999968 | 0.0833330000000032  | 0.0514190000000028  | F | F | F |
|                    | 0.4162149308036902 | 0.0831587167784704  | 0.3135352600728609  | T | T | T |
|                    | 0.3334737354919071 | 0.1672504434073758  | 0.2266812803713449  | T | T | T |
|                    | 0.5000000000000000 | 0.0000000000000000  | 0.1392870000000030  | F | F | F |
|                    | 0.5005299620508268 | 0.0010626090732373  | 0.4007649205623522  | T | T | T |
|                    | 0.6666669999999968 | 0.0833330000000032  | 0.0514190000000028  | F | F | F |
|                    | 0.6668694599083196 | 0.0831711184445467  | 0.3135438981203151  | T | T | T |
|                    | 0.5833325843404396 | 0.1666815769421888  | 0.2263617599698762  | T | T | T |
|                    | 0.7500000000000000 | 0.0000000000000000  | 0.1392870000000030  | F | F | F |
|                    | 0.7504674452524611 | 0.0007638674089776  | 0.4005758324693005  | T | T | T |
|                    | 0.9166669999999968 | 0.0833330000000032  | 0.0514190000000028  | F | F | F |
|                    | 0.9165727240880486 | 0.0834422171308660  | 0.3133561494638499  | T | T | T |
|                    | 0.8337350822405796 | 0.1672364859351916  | 0.2266815961784587  | T | T | T |
|                    | 0.0000000000000000 | 0.2500000000000000  | 0.1392870000000030  | F | F | F |
|                    | 0.9925401865377523 | 0.2387069579415666  | 0.4013188841863311  | T | T | T |
|                    | 0.1666669999999968 | 0.3333330000000032  | 0.0514190000000028  | F | F | F |
|                    | 0.1668946887018876 | 0.3337786887530072  | 0.3158479134811074  | T | T | T |
|                    | 0.0836679253737742 | 0.4166540658004791  | 0.2277996232416726  | T | T | T |
|                    | 0.2500000000000000 | 0.2500000000000000  | 0.1392870000000030  | F | F | F |
|                    | 0.2461763107218928 | 0.2387038829813051  | 0.4013108869943522  | T | T | T |
|                    | 0.4166669999999968 | 0.3333330000000032  | 0.0514190000000028  | F | F | F |
|                    | 0.4175929808079104 | 0.3355712974552958  | 0.3163346664447175  | T | T | T |
|                    | 0.3329984872906309 | 0.4166828028561511  | 0.2277976658466585  | T | T | T |
|                    | 0.5000000000000000 | 0.2500000000000000  | 0.1392870000000030  | F | F | F |

|                    |                    |                     |                    |   |   |
|--------------------|--------------------|---------------------|--------------------|---|---|
| 0.5000591716505127 | 0.2433304028368894 | 0.4005343075297745  | T                  | T | T |
| 0.6666669999999968 | 0.3333330000000032 | 0.0514190000000028  | F                  | F | F |
| 0.6666035489290607 | 0.3332058328881615 | 0.3135551530706664  | T                  | T | T |
| 0.5825966106740736 | 0.4163750686586170 | 0.2270247159442462  | T                  | T | T |
| 0.7500000000000000 | 0.2500000000000000 | 0.1392870000000030  | F                  | F | F |
| 0.7432715032878505 | 0.2432982073180980 | 0.4005477231681169  | T                  | T | T |
| 0.9166669999999968 | 0.3333330000000032 | 0.0514190000000028  | F                  | F | F |
| 0.9179617578742949 | 0.3355618403398353 | 0.3163466534968364  | T                  | T | T |
| 0.8337956937934479 | 0.4163831993572558 | 0.2270185827321569  | T                  | T | T |
| 0.0000000000000000 | 0.5000000000000000 | 0.1392870000000030  | F                  | F | F |
| 0.1666669999999968 | 0.5833330000000032 | 0.0514190000000028  | F                  | F | F |
| 0.1657941700018100 | 0.5829682016008704 | 0.3167387497431662  | T                  | T | T |
| 0.0836162790305011 | 0.6661595741372395 | 0.2269909342532799  | T                  | T | T |
| 0.2500000000000000 | 0.5000000000000000 | 0.1392870000000030  | F                  | F | F |
| 0.4166669999999968 | 0.5833330000000032 | 0.0514190000000028  | F                  | F | F |
| 0.4171848419095241 | 0.5829867085314149 | 0.3167316620231375  | T                  | T | T |
| 0.3327802217026345 | 0.6655608280172132 | 0.2275810153614799  | T                  | T | T |
| 0.5000000000000000 | 0.5000000000000000 | 0.1392870000000030  | F                  | F | F |
| 0.6666669999999968 | 0.5833330000000032 | 0.0514190000000028  | F                  | F | F |
| 0.6648076181049802 | 0.5832090819244442 | 0.3148327406911520  | T                  | T | T |
| 0.5825441326075378 | 0.6661760803565784 | 0.2269883242316055  | T                  | T | T |
| 0.7500000000000000 | 0.5000000000000000 | 0.1392870000000030  | F                  | F | F |
| 0.7495448647707477 | 0.4990739550976215 | 0.3978519537335004  | T                  | T | T |
| 0.9166669999999968 | 0.5833330000000032 | 0.0514190000000028  | F                  | F | F |
| 0.9183576590761078 | 0.5832089861603507 | 0.3148197991816986  | T                  | T | T |
| 0.8328244551757535 | 0.6656649544984177 | 0.2264772800544890  | T                  | T | T |
| 0.0000000000000000 | 0.7500000000000000 | 0.1392870000000030  | F                  | F | F |
| 0.0013295724724927 | 0.7578977948490859 | 0.3997614616960945  | T                  | T | T |
| 0.1666669999999968 | 0.8333330000000032 | 0.0514190000000028  | F                  | F | F |
| 0.1666161225296037 | 0.8331937878674935 | 0.3135447781191800  | T                  | T | T |
| 0.0835030812018402 | 0.9165858337168800 | 0.2263469640238256  | T                  | T | T |
| 0.2500000000000000 | 0.7500000000000000 | 0.1392870000000030  | F                  | F | F |
| 0.2547704176036092 | 0.7629139072152284 | 0.4009889234288764  | T                  | T | T |
| 0.4166669999999968 | 0.8333330000000032 | 0.0514190000000028  | F                  | F | F |
| 0.4159050592199591 | 0.8318300951534638 | 0.3140266881435849  | T                  | T | T |
| 0.3333142842733281 | 0.9163234208353117 | 0.2265229578247769  | T                  | T | T |
| 0.5000000000000000 | 0.7500000000000000 | 0.1392870000000030  | F                  | F | F |
| 0.5081485447229213 | 0.7628857190546654 | 0.4009815027081771  | T                  | T | T |
| 0.6666669999999968 | 0.8333330000000032 | 0.0514190000000028  | F                  | F | F |
| 0.6665928716816936 | 0.8331870090156954 | 0.3135494421480018  | T                  | T | T |
| 0.5829696732727001 | 0.9162953220778363 | 0.2265201074174428  | T                  | T | T |
| 0.7500000000000000 | 0.7500000000000000 | 0.1392870000000030  | F                  | F | F |
| 0.7565479227334819 | 0.7578862550565972 | 0.3997693777635973  | T                  | T | T |
| 0.9166669999999968 | 0.8333330000000032 | 0.0514190000000028  | F                  | F | F |
| 0.9158894710486294 | 0.8318450890131786 | 0.3127831954351734  | T                  | T | T |
| 0.8330616672490549 | 0.9165822266344108 | 0.2263399568533018  | T                  | T | T |
| 0.2502489278718656 | 0.5004523502237035 | 0.4184693933481185  | T                  | T | T |
| 0.9900553736045694 | 0.5008492150854451 | 0.4281699060698116  | T                  | T | T |
| 0.5107804402649663 | 0.5008418274577409 | 0.4281909119299883  | T                  | T | T |
| <b>3Au/Ni(111)</b> | 1.0000000000000000 |                     |                    |   |   |
|                    | 8.6224000674449712 | -4.9781450000000014 | 0.0000000000000000 |   |   |

|                    |                    |                     |   |   |
|--------------------|--------------------|---------------------|---|---|
| 0.0000000000000000 | 9.9562900000000010 | 0.0000000000000000  |   |   |
| 0.0000000000000000 | 0.0000000000000000 | 23.1292800000000014 |   |   |
| Ni                 | Au                 |                     |   |   |
| 77                 | 3                  |                     |   |   |
| Selective dynamics |                    |                     |   |   |
| Direct             |                    |                     |   |   |
| 0.0000000000000000 | 0.0000000000000000 | 0.1392870000000030  | F | F |
| 0.0004614609798210 | 0.0009207847393142 | 0.4003066285075434  | T | T |
| 0.1666669999999968 | 0.0833330000000032 | 0.0514190000000028  | F | F |
| 0.1672647342935605 | 0.0840201799917963 | 0.3138036264878465  | T | T |
| 0.0835651664173866 | 0.1671697129130933 | 0.2267378367637320  | T | T |
| 0.2500000000000000 | 0.0000000000000000 | 0.1392870000000030  | F | F |
| 0.2502501970761770 | 0.0005516728348027 | 0.4005575049528218  | T | T |
| 0.4166669999999968 | 0.0833330000000032 | 0.0514190000000028  | F | F |
| 0.4162878497204616 | 0.0827909853572777 | 0.3136679394056756  | T | T |
| 0.3333834674482574 | 0.1667650682765256 | 0.2266013084065222  | T | T |
| 0.5000000000000000 | 0.0000000000000000 | 0.1392870000000030  | F | F |
| 0.4998783075163900 | 0.9997390223573319 | 0.4007832970382950  | T | T |
| 0.6666669999999968 | 0.0833330000000032 | 0.0514190000000028  | F | F |
| 0.6665042808738093 | 0.0827751180498311 | 0.3136665680292552  | T | T |
| 0.5833185848141582 | 0.1666399575198483 | 0.2264224072683518  | T | T |
| 0.7500000000000000 | 0.0000000000000000 | 0.1392870000000030  | F | F |
| 0.7503341077905219 | 0.0005566175582814 | 0.4005666680048563  | T | T |
| 0.9166669999999968 | 0.0833330000000032 | 0.0514190000000028  | F | F |
| 0.9167532614827039 | 0.0840115439754001 | 0.3138207884960238  | T | T |
| 0.8333742482349535 | 0.1667746321979848 | 0.2266092220447220  | T | T |
| 0.0000000000000000 | 0.2500000000000000 | 0.1392870000000030  | F | F |
| 0.9935308235101417 | 0.2402719338194714 | 0.4021892638900653  | T | T |
| 0.1666669999999968 | 0.3333330000000032 | 0.0514190000000028  | F | F |
| 0.1666001740624736 | 0.3332350303546505 | 0.3154650708297950  | T | T |
| 0.0835637300757526 | 0.4164836221669930 | 0.2275432642933808  | T | T |
| 0.2500000000000000 | 0.2500000000000000 | 0.1392870000000030  | F | F |
| 0.2467785616247014 | 0.2402695891341295 | 0.4021784414916638  | T | T |
| 0.4166669999999968 | 0.3333330000000032 | 0.0514190000000028  | F | F |
| 0.4172364061899358 | 0.3337449993245585 | 0.3151050053180953  | T | T |
| 0.3329222979825275 | 0.4164820941645289 | 0.2275472711978423  | T | T |
| 0.5000000000000000 | 0.2500000000000000 | 0.1392870000000030  | F | F |
| 0.4993811715115157 | 0.2419024630936661 | 0.4010010323110151  | T | T |
| 0.6666669999999968 | 0.3333330000000032 | 0.0514190000000028  | F | F |
| 0.6664099989330339 | 0.3328223986519703 | 0.3135698400541784  | T | T |
| 0.5830417205826564 | 0.4166243606664040 | 0.2268907679190022  | T | T |
| 0.7500000000000000 | 0.2500000000000000 | 0.1392870000000030  | F | F |
| 0.7425044658113720 | 0.2418907483634953 | 0.4009993520988573  | T | T |
| 0.9166669999999968 | 0.3333330000000032 | 0.0514190000000028  | F | F |
| 0.9165122329221518 | 0.3337327445191960 | 0.3151081478071589  | T | T |
| 0.8335746052459712 | 0.4166128280425525 | 0.2268949225546706  | T | T |
| 0.0000000000000000 | 0.5000000000000000 | 0.1392870000000030  | F | F |
| 0.1666669999999968 | 0.5833330000000032 | 0.0514190000000028  | F | F |
| 0.1662413638266003 | 0.5830971320118152 | 0.3159172600576809  | T | T |
| 0.0836664050290139 | 0.6663968040339796 | 0.2269584110161276  | T | T |
| 0.2500000000000000 | 0.5000000000000000 | 0.1392870000000030  | F | F |

|                    |                    |                     |                     |   |   |   |
|--------------------|--------------------|---------------------|---------------------|---|---|---|
|                    | 0.416666999999968  | 0.5833330000000032  | 0.0514190000000028  | F | F | F |
|                    | 0.4168616900124320 | 0.5830776482445259  | 0.3159122777295806  | T | T | T |
|                    | 0.3329060022494872 | 0.6658465983416022  | 0.2274861470932876  | T | T | T |
|                    | 0.5000000000000000 | 0.5000000000000000  | 0.1392870000000030  | F | F | F |
|                    | 0.666666999999968  | 0.5833330000000032  | 0.0514190000000028  | F | F | F |
|                    | 0.6669302096830094 | 0.5841394749635356  | 0.3142756589048190  | T | T | T |
|                    | 0.5826950497719494 | 0.6663758569739855  | 0.2269652123857426  | T | T | T |
|                    | 0.7500000000000000 | 0.5000000000000000  | 0.1392870000000030  | F | F | F |
|                    | 0.7493155321019174 | 0.4985932077372865  | 0.3994121074912158  | T | T | T |
|                    | 0.916666999999968  | 0.5833330000000032  | 0.0514190000000028  | F | F | F |
|                    | 0.9172013094242359 | 0.5841420407414262  | 0.3142688459503233  | T | T | T |
|                    | 0.8333121199290758 | 0.6666446536414981  | 0.2264021200023834  | T | T | T |
|                    | 0.0000000000000000 | 0.7500000000000000  | 0.1392870000000030  | F | F | F |
|                    | 0.0013339306219962 | 0.7587072245597213  | 0.4006909240096661  | T | T | T |
|                    | 0.166666999999968  | 0.8333330000000032  | 0.0514190000000028  | F | F | F |
|                    | 0.1667678149954739 | 0.8333184766370749  | 0.3136513305960449  | T | T | T |
|                    | 0.0836095560768086 | 0.9167952146286495  | 0.2264962083453952  | T | T | T |
|                    | 0.2500000000000000 | 0.7500000000000000  | 0.1392870000000030  | F | F | F |
|                    | 0.2539394915150908 | 0.7610357230832534  | 0.4019833647242592  | T | T | T |
|                    | 0.416666999999968  | 0.8333330000000032  | 0.0514190000000028  | F | F | F |
|                    | 0.4160078856504938 | 0.8319917917988136  | 0.3143275062842719  | T | T | T |
|                    | 0.3333497017138995 | 0.9162292773304443  | 0.2265705207964075  | T | T | T |
|                    | 0.5000000000000000 | 0.7500000000000000  | 0.1392870000000030  | F | F | F |
|                    | 0.5071460499222482 | 0.7610556769393213  | 0.4019907109529868  | T | T | T |
|                    | 0.666666999999968  | 0.8333330000000032  | 0.0514190000000028  | F | F | F |
|                    | 0.6665626513098744 | 0.8333042585581438  | 0.3136484603389391  | T | T | T |
|                    | 0.5828673117810368 | 0.9162188131525681  | 0.2265669175666005  | T | T | T |
|                    | 0.7500000000000000 | 0.7500000000000000  | 0.1392870000000030  | F | F | F |
|                    | 0.7573773092513463 | 0.7587426069377443  | 0.4006969682787584  | T | T | T |
|                    | 0.916666999999968  | 0.8333330000000032  | 0.0514190000000028  | F | F | F |
|                    | 0.9167030788568695 | 0.8333739237747722  | 0.3133476830988897  | T | T | T |
|                    | 0.8331701446811834 | 0.9167946532171527  | 0.2264927407618416  | T | T | T |
|                    | 0.2503042339384862 | 0.5005830801409203  | 0.4196954305705134  | T | T | T |
|                    | 0.9898332733547832 | 0.5004542763837065  | 0.4198154208214788  | T | T | T |
|                    | 0.5106687530103713 | 0.5004674145524461  | 0.4198198656836283  | T | T | T |
| <b>3Ni/Cu(111)</b> | 1.0000000000000000 |                     |                     |   |   |   |
|                    | 8.8905944857135406 | -5.1329871195825199 | -0.0000000000000010 |   |   |   |
|                    | 0.0000000000000000 | 10.2659742391650006 | 0.0000000000000010  |   |   |   |
|                    | 0.0000000000000000 | 0.0000000000000000  | 23.3821328661704015 |   |   |   |
|                    | Ni                 | Cu                  |                     |   |   |   |
|                    | 3                  | 77                  |                     |   |   |   |
|                    | Selective dynamics |                     |                     |   |   |   |
|                    | Direct             |                     |                     |   |   |   |
|                    | 0.4994666361713982 | 0.2519844260339497  | 0.3794257279903661  | T | T | T |
|                    | 0.4990876965987212 | 0.4995438482993606  | 0.3795565029478212  | T | T | T |
|                    | 0.4994666361713982 | 0.7474822101374485  | 0.3794257279903661  | T | T | T |
|                    | 0.0000000000000000 | 0.0000000000000000  | 0.1155258754999977  | F | F | F |
|                    | 0.0000598016835767 | 0.9999654481029836  | 0.3830112364813871  | T | T | T |
|                    | 0.1666666667000030 | 0.0833333332999970  | 0.0259047434999999  | F | F | F |
|                    | 0.1670374753980113 | 0.0836642649718371  | 0.2944710843703433  | T | T | T |
|                    | 0.0834368378265467 | 0.1667138153155889  | 0.2050975988933104  | T | T | T |

|                    |                    |                    |       |
|--------------------|--------------------|--------------------|-------|
| 0.2500000000000000 | 0.0000000000000000 | 0.1155258754999977 | F F F |
| 0.2525612344283914 | 0.0023385169601724 | 0.3833440556172931 | T T T |
| 0.4166666667000030 | 0.083333332999970  | 0.0259047434999999 | F F F |
| 0.4172653995466789 | 0.0839948798511045 | 0.2942649875906298 | T T T |
| 0.3333035673202360 | 0.1666283813280813 | 0.2047534245414084 | T T T |
| 0.5000000000000000 | 0.0000000000000000 | 0.1155258754999977 | F F F |
| 0.4997475374280640 | 0.9998737687140320 | 0.3832851826824353 | T T T |
| 0.6666666667000030 | 0.083333332999970  | 0.0259047434999999 | F F F |
| 0.6664789656945871 | 0.0832394827972891 | 0.2942929580291320 | T T T |
| 0.5835447512743670 | 0.1666252645224517 | 0.2047253129397646 | T T T |
| 0.7500000000000000 | 0.0000000000000000 | 0.1155258754999977 | F F F |
| 0.7471809561151659 | 0.9972735514852289 | 0.3830558000396422 | T T T |
| 0.9166666667000030 | 0.083333332999970  | 0.0259047434999999 | F F F |
| 0.9164251239736032 | 0.0832187412750187 | 0.2944665831008493 | T T T |
| 0.8333547122920777 | 0.1666773561960468 | 0.2050606479769641 | T T T |
| 0.0000000000000000 | 0.2500000000000000 | 0.1155258754999977 | F F F |
| 0.0001006639473147 | 0.2500503319736538 | 0.3828912734313761 | T T T |
| 0.1666666667000030 | 0.333333332999970  | 0.0259047434999999 | F F F |
| 0.1671031965870924 | 0.3335515982435382 | 0.2944381890558745 | T T T |
| 0.0834368378265467 | 0.4167230226109666 | 0.2050975988933104 | T T T |
| 0.2500000000000000 | 0.2500000000000000 | 0.1155258754999977 | F F F |
| 0.2536724918078903 | 0.2522190359279790 | 0.3833270767019386 | T T T |
| 0.4166666667000030 | 0.333333332999970  | 0.0259047434999999 | F F F |
| 0.4169836050922768 | 0.3338238475628685 | 0.2937079972776573 | T T T |
| 0.3333214477751980 | 0.4166607239376034 | 0.2046899428274926 | T T T |
| 0.5000000000000000 | 0.2500000000000000 | 0.1155258754999977 | F F F |
| 0.6666666667000030 | 0.333333332999970  | 0.0259047434999999 | F F F |
| 0.6662928705241171 | 0.3332479272578794 | 0.2939426762040611 | T T T |
| 0.5836007942138579 | 0.4168138532104564 | 0.2043633780121965 | T T T |
| 0.7500000000000000 | 0.2500000000000000 | 0.1155258754999977 | F F F |
| 0.7471809561151659 | 0.2499074046299370 | 0.3830558000396422 | T T T |
| 0.9166666667000030 | 0.333333332999970  | 0.0259047434999999 | F F F |
| 0.9164251239736032 | 0.3332063825985756 | 0.2944665831008493 | T T T |
| 0.8333424402250600 | 0.4166358930249672 | 0.2050397107390864 | T T T |
| 0.0000000000000000 | 0.5000000000000000 | 0.1155258754999977 | F F F |
| 0.0000598016835767 | 0.5000943535805860 | 0.3830112364813871 | T T T |
| 0.1666666667000030 | 0.583333332999970  | 0.0259047434999999 | F F F |
| 0.1670374753980113 | 0.5833732103261582 | 0.2944710843703433 | T T T |
| 0.0834471502652008 | 0.6667104152802921 | 0.2051045537212062 | T T T |
| 0.2500000000000000 | 0.5000000000000000 | 0.1155258754999977 | F F F |
| 0.2536724918078903 | 0.5014534558799042 | 0.3833270767019386 | T T T |
| 0.4166666667000030 | 0.583333332999970  | 0.0259047434999999 | F F F |
| 0.4169836050922768 | 0.5831597574293923 | 0.2937079972776573 | T T T |
| 0.3333035673202360 | 0.6666751860921636 | 0.2047534245414084 | T T T |
| 0.5000000000000000 | 0.5000000000000000 | 0.1155258754999977 | F F F |
| 0.6666666667000030 | 0.583333332999970  | 0.0259047434999999 | F F F |
| 0.6663475303895581 | 0.5831737651447710 | 0.2938702118896046 | T T T |
| 0.5836007942138579 | 0.6667869411034104 | 0.2043633780121965 | T T T |
| 0.7500000000000000 | 0.5000000000000000 | 0.1155258754999977 | F F F |
| 0.7458770998935478 | 0.4984733899794520 | 0.3831685599484516 | T T T |
| 0.9166666667000030 | 0.583333332999970  | 0.0259047434999999 | F F F |

|                    |                    |                     |                     |   |   |   |
|--------------------|--------------------|---------------------|---------------------|---|---|---|
|                    | 0.9162856553086911 | 0.5831795178335284  | 0.2944868022552214  | T | T | T |
|                    | 0.8333387974984916 | 0.6666693987992502  | 0.2050379629482890  | T | T | T |
|                    | 0.0000000000000000 | 0.7500000000000000  | 0.1155258754999977  | F | F | F |
|                    | 0.9998324066534536 | 0.7499162033267339  | 0.3830115777137948  | T | T | T |
|                    | 0.1666666667000030 | 0.833333332999970   | 0.0259047434999999  | F | F | F |
|                    | 0.1671568552031673 | 0.8335784275515792  | 0.2946427647342276  | T | T | T |
|                    | 0.0834471502652008 | 0.9167367350849247  | 0.2051045537212062  | T | T | T |
|                    | 0.2500000000000000 | 0.7500000000000000  | 0.1155258754999977  | F | F | F |
|                    | 0.2525612344283914 | 0.7502227174682261  | 0.3833440556172931  | T | T | T |
|                    | 0.4166666667000030 | 0.833333332999970   | 0.0259047434999999  | F | F | F |
|                    | 0.4172653995466789 | 0.8332705195955654  | 0.2942649875906298  | T | T | T |
|                    | 0.3335528763555828 | 0.9167764382277994  | 0.2051264646336577  | T | T | T |
|                    | 0.5000000000000000 | 0.7500000000000000  | 0.1155258754999977  | F | F | F |
|                    | 0.6666666667000030 | 0.833333332999970   | 0.0259047434999999  | F | F | F |
|                    | 0.6662928705241171 | 0.8330449431662288  | 0.2939426762040611  | T | T | T |
|                    | 0.5835447512743670 | 0.9169194868519241  | 0.2047253129397646  | T | T | T |
|                    | 0.7500000000000000 | 0.7500000000000000  | 0.1155258754999977  | F | F | F |
|                    | 0.7458770998935478 | 0.7474037099141029  | 0.3831685599484516  | T | T | T |
|                    | 0.9166666667000030 | 0.833333332999970   | 0.0259047434999999  | F | F | F |
|                    | 0.9162856553086911 | 0.8331061373751467  | 0.2944868022552214  | T | T | T |
|                    | 0.8333424402250600 | 0.9167065473001017  | 0.2050397107390864  | T | T | T |
| <b>3Pd/Cu(111)</b> | 1.0000000000000000 |                     |                     |   |   |   |
|                    | 8.8905944857135406 | -5.1329871195825199 | -0.0000000000000010 |   |   |   |
|                    | 0.0000000000000000 | 10.2659742391650006 | 0.0000000000000010  |   |   |   |
|                    | 0.0000000000000000 | 0.0000000000000000  | 23.3821328661704015 |   |   |   |
|                    | Pd                 | Cu                  |                     |   |   |   |
|                    | 3                  | 77                  |                     |   |   |   |
|                    | Selective dynamics |                     |                     |   |   |   |
|                    | Direct             |                     |                     |   |   |   |
|                    | 0.4998467064730292 | 0.2435672159657472  | 0.3871224100401065  | T | T | T |
|                    | 0.4997443548824378 | 0.4998721774412118  | 0.3876673539287196  | T | T | T |
|                    | 0.4998467064730292 | 0.7562794905072749  | 0.3871224100401065  | T | T | T |
|                    | 0.0000000000000000 | 0.0000000000000000  | 0.1155258754999977  | F | F | F |
|                    | 0.9999917708620742 | 0.9999890507948876  | 0.3828769681622788  | T | T | T |
|                    | 0.1666666667000030 | 0.083333332999970   | 0.0259047434999999  | F | F | F |
|                    | 0.1667796906333834 | 0.0834728447013333  | 0.2940906045863372  | T | T | T |
|                    | 0.0836600928792137 | 0.1670031038340838  | 0.2049218584187216  | T | T | T |
|                    | 0.2500000000000000 | 0.0000000000000000  | 0.1155258754999977  | F | F | F |
|                    | 0.2449132749833538 | 0.9954835794969767  | 0.3832939574966829  | T | T | T |
|                    | 0.4166666667000030 | 0.083333332999970   | 0.0259047434999999  | F | F | F |
|                    | 0.4160410355112063 | 0.0824914212610253  | 0.2939782218412077  | T | T | T |
|                    | 0.3336984851015146 | 0.1672018463622180  | 0.2048543601779258  | T | T | T |
|                    | 0.5000000000000000 | 0.0000000000000000  | 0.1155258754999977  | F | F | F |
|                    | 0.4996756728976024 | 0.9998378364487976  | 0.3840719861363482  | T | T | T |
|                    | 0.6666666667000030 | 0.083333332999970   | 0.0259047434999999  | F | F | F |
|                    | 0.6663168418070455 | 0.0831584208535219  | 0.2945635403231179  | T | T | T |
|                    | 0.5836007082240755 | 0.1667444398410254  | 0.2048881436192147  | T | T | T |
|                    | 0.7500000000000000 | 0.0000000000000000  | 0.1155258754999977  | F | F | F |
|                    | 0.7549003654058026 | 0.0043056987665580  | 0.3836378287689755  | T | T | T |
|                    | 0.9166666667000030 | 0.083333332999970   | 0.0259047434999999  | F | F | F |
|                    | 0.9168452744333848 | 0.0836608798921574  | 0.2940295879465680  | T | T | T |

|                    |                    |                    |   |   |   |
|--------------------|--------------------|--------------------|---|---|---|
| 0.8331190433470965 | 0.1665595217235492 | 0.2049485383827232 | T | T | T |
| 0.0000000000000000 | 0.2500000000000000 | 0.1155258754999977 | F | F | F |
| 0.0005343031271963 | 0.2502671515635981 | 0.3828942686564005 | T | T | T |
| 0.1666666667000030 | 0.333333332999970  | 0.0259047434999999 | F | F | F |
| 0.1674303305810128 | 0.3337151652405055 | 0.2943118781745895 | T | T | T |
| 0.0836600928792137 | 0.4166569891451388 | 0.2049218584187216 | T | T | T |
| 0.2500000000000000 | 0.2500000000000000 | 0.1155258754999977 | F | F | F |
| 0.2443199888402319 | 0.2463091167046798 | 0.3840536411749227 | T | T | T |
| 0.4166666667000030 | 0.333333332999970  | 0.0259047434999999 | F | F | F |
| 0.4166411522244857 | 0.3330213303714942 | 0.2945342711018242 | T | T | T |
| 0.3340640879600443 | 0.4170320440300301 | 0.2051473659567975 | T | T | T |
| 0.5000000000000000 | 0.2500000000000000 | 0.1155258754999977 | F | F | F |
| 0.6666666667000030 | 0.333333332999970  | 0.0259047434999999 | F | F | F |
| 0.6671253860473527 | 0.3333742068072851 | 0.2943916444885630 | T | T | T |
| 0.5837113002336736 | 0.4169298674039794 | 0.2048763293551588 | T | T | T |
| 0.7500000000000000 | 0.2500000000000000 | 0.1155258754999977 | F | F | F |
| 0.7549003654058026 | 0.2505946666392447 | 0.3836378287689755 | T | T | T |
| 0.9166666667000030 | 0.333333332999970  | 0.0259047434999999 | F | F | F |
| 0.9168452744333848 | 0.3331843944412114 | 0.2940295879465680 | T | T | T |
| 0.8329879770094166 | 0.4163482561107941 | 0.2049866936650844 | T | T | T |
| 0.0000000000000000 | 0.5000000000000000 | 0.1155258754999977 | F | F | F |
| 0.9999917708620742 | 0.5000027200671866 | 0.3828769681622788 | T | T | T |
| 0.1666666667000030 | 0.583333332999970  | 0.0259047434999999 | F | F | F |
| 0.1667796906333834 | 0.5833068458320483 | 0.2940906045863372 | T | T | T |
| 0.0833973152220224 | 0.6664279534845363 | 0.2047019166284301 | T | T | T |
| 0.2500000000000000 | 0.5000000000000000 | 0.1155258754999977 | F | F | F |
| 0.2443199888402319 | 0.4980108721355450 | 0.3840536411749227 | T | T | T |
| 0.4166666667000030 | 0.583333332999970  | 0.0259047434999999 | F | F | F |
| 0.4166411522244857 | 0.5836198217529898 | 0.2945342711018242 | T | T | T |
| 0.3336984851015146 | 0.6664966388393054 | 0.2048543601779258 | T | T | T |
| 0.5000000000000000 | 0.5000000000000000 | 0.1155258754999977 | F | F | F |
| 0.6666666667000030 | 0.583333332999970  | 0.0259047434999999 | F | F | F |
| 0.6672285355693504 | 0.5836142677346672 | 0.2945950003094637 | T | T | T |
| 0.5837113002336736 | 0.6667814329297101 | 0.2048763293551588 | T | T | T |
| 0.7500000000000000 | 0.5000000000000000 | 0.1155258754999977 | F | F | F |
| 0.7555336179965835 | 0.5019949922372717 | 0.3840975432002054 | T | T | T |
| 0.9166666667000030 | 0.583333332999970  | 0.0259047434999999 | F | F | F |
| 0.9164697238138118 | 0.5830207146583959 | 0.2939545576156419 | T | T | T |
| 0.8329498474440911 | 0.6664749237720500 | 0.2050636039087976 | T | T | T |
| 0.0000000000000000 | 0.7500000000000000 | 0.1155258754999977 | F | F | F |
| 0.9994445597490085 | 0.7497222798745042 | 0.3826963776035086 | T | T | T |
| 0.1666666667000030 | 0.833333332999970  | 0.0259047434999999 | F | F | F |
| 0.1659430414063010 | 0.8329715206531461 | 0.2937062044052183 | T | T | T |
| 0.0833973152220224 | 0.9169693618375021 | 0.2047019166284301 | T | T | T |
| 0.2500000000000000 | 0.7500000000000000 | 0.1155258754999977 | F | F | F |
| 0.2449132749833538 | 0.7494296954863771 | 0.3832939574966829 | T | T | T |
| 0.4166666667000030 | 0.833333332999970  | 0.0259047434999999 | F | F | F |
| 0.4160410355112063 | 0.8335496141501721 | 0.2939782218412077 | T | T | T |
| 0.3336799806826392 | 0.9168399903913169 | 0.2049416274558169 | T | T | T |
| 0.5000000000000000 | 0.7500000000000000 | 0.1155258754999977 | F | F | F |
| 0.6666666667000030 | 0.833333332999970  | 0.0259047434999999 | F | F | F |

|                    |                                                                |
|--------------------|----------------------------------------------------------------|
|                    | 0.6671253860473527 0.8337511791400658 0.2943916444885630 T T T |
|                    | 0.5836007082240755 0.9168562684830519 0.2048881436192147 T T T |
|                    | 0.7500000000000000 0.7500000000000000 0.1155258754999977 F F F |
|                    | 0.7555336179965835 0.7535386257593046 0.3840975432002054 T T T |
|                    | 0.9166666667000030 0.833333332999970 0.0259047434999999 F F F  |
|                    | 0.9164697238138118 0.8334490090553999 0.2939545576156419 T T T |
|                    | 0.8329879770094166 0.9166397209986314 0.2049866936650844 T T T |
| <b>3Pt/Cu(111)</b> | 1.0000000000000000                                             |
|                    | 8.8905944857135406 -5.1329871195825199 -0.0000000000000010     |
|                    | 0.0000000000000000 10.2659742391650006 0.0000000000000010      |
|                    | 0.0000000000000000 0.0000000000000000 23.3821328661704015      |
|                    | Pt Cu                                                          |
|                    | 3 77                                                           |
|                    | Selective dynamics                                             |
|                    | Direct                                                         |
|                    | 0.5001681756599226 0.2441665544992873 0.3851284869244154 T T T |
|                    | 0.4994653506329882 0.4997326753165012 0.3865921714348772 T T T |
|                    | 0.5001681756599226 0.7560016211606353 0.3851284869244154 T T T |
|                    | 0.0000000000000000 0.0000000000000000 0.1155258754999977 F F F |
|                    | 0.0002123844926345 0.0000788218131902 0.3830773876375204 T T T |
|                    | 0.1666666667000030 0.083333332999970 0.0259047434999999 F F F  |
|                    | 0.1662340451700359 0.0833130181053079 0.2943400506892786 T T T |
|                    | 0.0833685096274905 0.1668478403787219 0.2051086363251358 T T T |
|                    | 0.2500000000000000 0.0000000000000000 0.1155258754999977 F F F |
|                    | 0.2462162617534744 0.9964658395789314 0.3842553189123805 T T T |
|                    | 0.4166666667000030 0.083333332999970 0.0259047434999999 F F F  |
|                    | 0.4155580149469458 0.0812522694349127 0.2937161862399975 T T T |
|                    | 0.3333121068939846 0.1668818450087741 0.2048204974971313 T T T |
|                    | 0.5000000000000000 0.0000000000000000 0.1155258754999977 F F F |
|                    | 0.4994520061414960 0.9997260030707409 0.3860603195537138 T T T |
|                    | 0.6666666667000030 0.083333332999970 0.0259047434999999 F F F  |
|                    | 0.6665586014066136 0.0832793006533024 0.2948867855778090 T T T |
|                    | 0.5835703102846779 0.1664829613366479 0.2048364317563980 T T T |
|                    | 0.7500000000000000 0.0000000000000000 0.1155258754999977 F F F |
|                    | 0.7539430600388854 0.0034205451974216 0.3845303315570447 T T T |
|                    | 0.9166666667000030 0.083333332999970 0.0259047434999999 F F F  |
|                    | 0.9166633028261941 0.0836684023380982 0.2944720130802025 T T T |
|                    | 0.8331162173734512 0.1665581087367300 0.2052021261825843 T T T |
|                    | 0.0000000000000000 0.2500000000000000 0.1155258754999977 F F F |
|                    | 0.0004969203543226 0.2502484601771542 0.3830717478557446 T T T |
|                    | 0.1666666667000030 0.333333332999970 0.0259047434999999 F F F  |
|                    | 0.1667909562785681 0.3333954780892796 0.2946432053683168 T T T |
|                    | 0.0833685096274905 0.4165206693487775 0.2051086363251358 T T T |
|                    | 0.2500000000000000 0.2500000000000000 0.1155258754999977 F F F |
|                    | 0.2455831794146803 0.2469237102178639 0.3852996419794010 T T T |
|                    | 0.4166666667000030 0.333333332999970 0.0259047434999999 F F F  |
|                    | 0.4159175129642350 0.3328436683436991 0.2936439434226088 T T T |
|                    | 0.3335802406604387 0.4167901203802202 0.2050006059785332 T T T |
|                    | 0.5000000000000000 0.2500000000000000 0.1155258754999977 F F F |
|                    | 0.6666666667000030 0.333333332999970 0.0259047434999999 F F F  |
|                    | 0.6686365906021834 0.3335691148224029 0.2937410426451876 T T T |



|                    |                    |                     |                     |   |   |   |
|--------------------|--------------------|---------------------|---------------------|---|---|---|
|                    | 0.5837734123459697 | 0.4169063685093448  | 0.2046350552082004  | T | T | T |
|                    | 0.7500000000000000 | 0.2500000000000000  | 0.1155258754999977  | F | F | F |
|                    | 0.7539430600388854 | 0.2505225148414638  | 0.3845303315570447  | T | T | T |
|                    | 0.9166666667000030 | 0.333333332999970   | 0.0259047434999999  | F | F | F |
|                    | 0.9166633028261941 | 0.3329949003880941  | 0.2944720130802025  | T | T | T |
|                    | 0.8332780822658279 | 0.4164935015886968  | 0.2050558598678904  | T | T | T |
|                    | 0.0000000000000000 | 0.5000000000000000  | 0.1155258754999977  | F | F | F |
|                    | 0.0002123844926345 | 0.5001335626794372  | 0.3830773876375204  | T | T | T |
|                    | 0.1666666667000030 | 0.583333332999970   | 0.0259047434999999  | F | F | F |
|                    | 0.1662340451700359 | 0.5829210269647191  | 0.2943400506892786  | T | T | T |
|                    | 0.0832761840107636 | 0.6664653232826439  | 0.2049581988533689  | T | T | T |
|                    | 0.2500000000000000 | 0.5000000000000000  | 0.1155258754999977  | F | F | F |
|                    | 0.2455831794146803 | 0.4986594691968165  | 0.3852996419794010  | T | T | T |
|                    | 0.4166666667000030 | 0.583333332999970   | 0.0259047434999999  | F | F | F |
|                    | 0.4159175129642350 | 0.5830738445205341  | 0.2936439434226088  | T | T | T |
|                    | 0.3333121068939846 | 0.6664302619852123  | 0.2048204974971313  | T | T | T |
|                    | 0.5000000000000000 | 0.5000000000000000  | 0.1155258754999977  | F | F | F |
|                    | 0.6666666667000030 | 0.583333332999970   | 0.0259047434999999  | F | F | F |
|                    | 0.6687892773762698 | 0.5843946386381305  | 0.2940401797694392  | T | T | T |
|                    | 0.5837734123459697 | 0.6668670439366338  | 0.2046350552082004  | T | T | T |
|                    | 0.7500000000000000 | 0.5000000000000000  | 0.1155258754999977  | F | F | F |
|                    | 0.7544248089857462 | 0.5016016191524386  | 0.3852020324927281  | T | T | T |
|                    | 0.9166666667000030 | 0.583333332999970   | 0.0259047434999999  | F | F | F |
|                    | 0.9163787007716380 | 0.5830149851566304  | 0.2944230710612885  | T | T | T |
|                    | 0.8332183309783900 | 0.6666091655391995  | 0.2051110669183771  | T | T | T |
|                    | 0.0000000000000000 | 0.7500000000000000  | 0.1155258754999977  | F | F | F |
|                    | 0.9997073235290657 | 0.7498536617645399  | 0.3829702582441428  | T | T | T |
|                    | 0.1666666667000030 | 0.833333332999970   | 0.0259047434999999  | F | F | F |
|                    | 0.1658163309862530 | 0.8329081654431221  | 0.2942060162417732  | T | T | T |
|                    | 0.0832761840107636 | 0.9168108608281287  | 0.2049581988533689  | T | T | T |
|                    | 0.2500000000000000 | 0.7500000000000000  | 0.1155258754999977  | F | F | F |
|                    | 0.2462162617534744 | 0.7497504221745359  | 0.3842553189123805  | T | T | T |
|                    | 0.4166666667000030 | 0.833333332999970   | 0.0259047434999999  | F | F | F |
|                    | 0.4155580149469458 | 0.8343057454120242  | 0.2937161862399975  | T | T | T |
|                    | 0.3333472737105012 | 0.9166736369052515  | 0.2048877141488390  | T | T | T |
|                    | 0.5000000000000000 | 0.7500000000000000  | 0.1155258754999977  | F | F | F |
|                    | 0.6666666667000030 | 0.833333332999970   | 0.0259047434999999  | F | F | F |
|                    | 0.6686365906021834 | 0.8350674756797716  | 0.2937410426451876  | T | T | T |
|                    | 0.5835703102846779 | 0.9170873490480389  | 0.2048364317563980  | T | T | T |
|                    | 0.7500000000000000 | 0.7500000000000000  | 0.1155258754999977  | F | F | F |
|                    | 0.7544248089857462 | 0.7528231898333146  | 0.3852020324927281  | T | T | T |
|                    | 0.9166666667000030 | 0.833333332999970   | 0.0259047434999999  | F | F | F |
|                    | 0.9163787007716380 | 0.8333637155149987  | 0.2944230710612885  | T | T | T |
|                    | 0.8332780822658279 | 0.9167845807771329  | 0.2050558598678904  | T | T | T |
| <b>(8) 4X-S1</b>   |                    |                     |                     |   |   |   |
| <b>4Cu/Ni(111)</b> | 1.0000000000000000 |                     |                     |   |   |   |
|                    | 8.6224000674449712 | -4.9781450000000014 | 0.0000000000000000  |   |   |   |
|                    | 0.0000000000000000 | 9.9562900000000010  | 0.0000000000000000  |   |   |   |
|                    | 0.0000000000000000 | 0.0000000000000000  | 23.1292800000000014 |   |   |   |
|                    | Ni                 | Cu                  |                     |   |   |   |
|                    | 76                 | 4                   |                     |   |   |   |

Selective dynamics

Direct

|                    |                    |                    |   |   |   |
|--------------------|--------------------|--------------------|---|---|---|
| 0.0000000000000000 | 0.0000000000000000 | 0.1392870000000030 | F | F | F |
| 0.1666669999999968 | 0.0833330000000032 | 0.0514190000000028 | F | F | F |
| 0.1666286820150802 | 0.0832977958227019 | 0.3144794338295043 | T | T | T |
| 0.0833497196269519 | 0.1667332751447645 | 0.2269407884954475 | T | T | T |
| 0.2500000000000000 | 0.0000000000000000 | 0.1392870000000030 | F | F | F |
| 0.2515561617714894 | 0.0014067365074126 | 0.4009077277413340 | T | T | T |
| 0.4166669999999968 | 0.0833330000000032 | 0.0514190000000028 | F | F | F |
| 0.4163755791234252 | 0.0836045140976722 | 0.3141851360150838 | T | T | T |
| 0.3333907313656894 | 0.1666061527990195 | 0.2264572310888511 | T | T | T |
| 0.5000000000000000 | 0.0000000000000000 | 0.1392870000000030 | F | F | F |
| 0.4997419860711858 | 0.0002452901378120 | 0.4009621571566129 | T | T | T |
| 0.6666669999999968 | 0.0833330000000032 | 0.0514190000000028 | F | F | F |
| 0.6671462049301056 | 0.0838984138078160 | 0.3144748911052844 | T | T | T |
| 0.5834328136100879 | 0.1668298839102604 | 0.2269754365093348 | T | T | T |
| 0.7500000000000000 | 0.0000000000000000 | 0.1392870000000030 | F | F | F |
| 0.7485660389325872 | 0.9984068424208559 | 0.4007894121626236 | T | T | T |
| 0.9166669999999968 | 0.0833330000000032 | 0.0514190000000028 | F | F | F |
| 0.9169008311965925 | 0.0830991688034075 | 0.3148811740731574 | T | T | T |
| 0.8333038909681036 | 0.1666961090318964 | 0.2268417620171874 | T | T | T |
| 0.0000000000000000 | 0.2500000000000000 | 0.1392870000000030 | F | F | F |
| 0.0015931575791441 | 0.2514339610674128 | 0.4007894121626236 | T | T | T |
| 0.1666669999999968 | 0.3333330000000032 | 0.0514190000000028 | F | F | F |
| 0.1664125882341310 | 0.3336177671851104 | 0.3140358838709290 | T | T | T |
| 0.0834350239908019 | 0.4166449338908649 | 0.2265261552159714 | T | T | T |
| 0.2500000000000000 | 0.2500000000000000 | 0.1392870000000030 | F | F | F |
| 0.2497157263112157 | 0.2503073409626211 | 0.4009210061168105 | T | T | T |
| 0.4166669999999968 | 0.3333330000000032 | 0.0514190000000028 | F | F | F |
| 0.4166853106980568 | 0.3333756179852969 | 0.3144676303175444 | T | T | T |
| 0.3332250206878129 | 0.4165915369234696 | 0.2269246515403154 | T | T | T |
| 0.5000000000000000 | 0.2500000000000000 | 0.1392870000000030 | F | F | F |
| 0.4985788209075110 | 0.2484830880257647 | 0.4008438372232348 | T | T | T |
| 0.6666669999999968 | 0.3333330000000032 | 0.0514190000000028 | F | F | F |
| 0.6668511740312795 | 0.3331488259687205 | 0.3148768407577833 | T | T | T |
| 0.5833035786228038 | 0.4166964213771962 | 0.2268804062726701 | T | T | T |
| 0.7500000000000000 | 0.2500000000000000 | 0.1392870000000030 | F | F | F |
| 0.9166669999999968 | 0.3333330000000032 | 0.0514190000000028 | F | F | F |
| 0.9161015861921840 | 0.3328537950698944 | 0.3144748911052844 | T | T | T |
| 0.8331701160897396 | 0.4165671863899121 | 0.2269754365093348 | T | T | T |
| 0.0000000000000000 | 0.5000000000000000 | 0.1392870000000030 | F | F | F |
| 0.9997547098621880 | 0.5002580139288142 | 0.4009621571566129 | T | T | T |
| 0.1666669999999968 | 0.5833330000000032 | 0.0514190000000028 | F | F | F |
| 0.1671357008890979 | 0.5839628942811288 | 0.3144615648762894 | T | T | T |
| 0.0833917146961483 | 0.6668823870388678 | 0.2270079661000466 | T | T | T |
| 0.2500000000000000 | 0.5000000000000000 | 0.1392870000000030 | F | F | F |
| 0.2485953619135373 | 0.4984709332310828 | 0.4007693473550447 | T | T | T |
| 0.4166669999999968 | 0.5833330000000032 | 0.0514190000000028 | F | F | F |
| 0.4168332181056584 | 0.5831667818943416 | 0.3148037334272189 | T | T | T |
| 0.3332727941441291 | 0.6667272058558709 | 0.2268330143297561 | T | T | T |
| 0.5000000000000000 | 0.5000000000000000 | 0.1392870000000030 | F | F | F |

|                    |                    |                     |                     |   |   |   |
|--------------------|--------------------|---------------------|---------------------|---|---|---|
|                    | 0.666666999999968  | 0.583333000000032   | 0.051419000000028   | F | F | F |
|                    | 0.6666243820147031 | 0.5833146893019432  | 0.3144676303175444  | T | T | T |
|                    | 0.5834084630765304 | 0.6667749793121871  | 0.2269246515403154  | T | T | T |
|                    | 0.7500000000000000 | 0.5000000000000000  | 0.1392870000000030  | F | F | F |
|                    | 0.7515169119742353 | 0.5014211790924890  | 0.4008438372232348  | T | T | T |
|                    | 0.916666999999968  | 0.583333000000032   | 0.051419000000028   | F | F | F |
|                    | 0.9163954859023278 | 0.5836244208765748  | 0.3141851360150838  | T | T | T |
|                    | 0.8333938472009805 | 0.6666092686343106  | 0.2264572310888511  | T | T | T |
|                    | 0.0000000000000000 | 0.7500000000000000  | 0.1392870000000030  | F | F | F |
|                    | 0.9985932634925874 | 0.7484438382285106  | 0.4009077277413340  | T | T | T |
|                    | 0.166666999999968  | 0.833333000000032   | 0.051419000000028   | F | F | F |
|                    | 0.1668320472626874 | 0.8331679527373126  | 0.3149329519405413  | T | T | T |
|                    | 0.0833210631435293 | 0.9166789368564707  | 0.2268984007875616  | T | T | T |
|                    | 0.2500000000000000 | 0.7500000000000000  | 0.1392870000000030  | F | F | F |
|                    | 0.416666999999968  | 0.833333000000032   | 0.051419000000028   | F | F | F |
|                    | 0.4160371057188712 | 0.8328642991109021  | 0.3144615648762894  | T | T | T |
|                    | 0.3331176129611251 | 0.9166082853038517  | 0.2270079661000466  | T | T | T |
|                    | 0.5000000000000000 | 0.7500000000000000  | 0.1392870000000030  | F | F | F |
|                    | 0.5015290667689172 | 0.7514046380864627  | 0.4007693473550447  | T | T | T |
|                    | 0.666666999999968  | 0.833333000000032   | 0.051419000000028   | F | F | F |
|                    | 0.6663822328148896 | 0.8335874117658690  | 0.3140358838709290  | T | T | T |
|                    | 0.5833550661091351 | 0.9165649760091981  | 0.2265261552159714  | T | T | T |
|                    | 0.7500000000000000 | 0.7500000000000000  | 0.1392870000000030  | F | F | F |
|                    | 0.7496926590373789 | 0.7502842736887843  | 0.4009210061168105  | T | T | T |
|                    | 0.916666999999968  | 0.833333000000032   | 0.051419000000028   | F | F | F |
|                    | 0.9167022041772981 | 0.8333713179849198  | 0.3144794338295043  | T | T | T |
|                    | 0.8332667248552355 | 0.9166502803730481  | 0.2269407884954475  | T | T | T |
|                    | 0.0001263311951760 | 0.9998736688048240  | 0.4062226938345930  | T | T | T |
|                    | 0.7501148705749543 | 0.2498851294250457  | 0.4062515215249434  | T | T | T |
|                    | 0.2501265219437556 | 0.7498734780562444  | 0.4062846147402865  | T | T | T |
|                    | 0.5001195981986157 | 0.4998804018013843  | 0.4061251966318906  | T | T | T |
| <b>4Ag/Ni(111)</b> | 1.0000000000000000 |                     |                     |   |   |   |
|                    | 8.6224000674449712 | -4.9781450000000014 | 0.0000000000000000  |   |   |   |
|                    | 0.0000000000000000 | 9.9562900000000010  | 0.0000000000000000  |   |   |   |
|                    | 0.0000000000000000 | 0.0000000000000000  | 23.1292800000000014 |   |   |   |
|                    | Ni                 | Ag                  |                     |   |   |   |
|                    | 76                 | 4                   |                     |   |   |   |
|                    | Selective dynamics |                     |                     |   |   |   |
|                    | Direct             |                     |                     |   |   |   |
|                    | 0.0000000000000000 | 0.0000000000000000  | 0.1392870000000030  | F | F | F |
|                    | 0.166666999999968  | 0.0833330000000032  | 0.0514190000000028  | F | F | F |
|                    | 0.1650047321982839 | 0.0822293067151776  | 0.3146510546491896  | T | T | T |
|                    | 0.0831759225586381 | 0.1662538294659512  | 0.2267553113052969  | T | T | T |
|                    | 0.2500000000000000 | 0.0000000000000000  | 0.1392870000000030  | F | F | F |
|                    | 0.2538852520753352 | 0.0042760777356676  | 0.3998217511192124  | T | T | T |
|                    | 0.416666999999968  | 0.0833330000000032  | 0.0514190000000028  | F | F | F |
|                    | 0.4161681240335540 | 0.0837769717065697  | 0.3132714352925348  | T | T | T |
|                    | 0.3333163209186054 | 0.1667425014331343  | 0.2264756095050942  | T | T | T |
|                    | 0.5000000000000000 | 0.0000000000000000  | 0.1392870000000030  | F | F | F |
|                    | 0.4993609714560918 | 0.0006507647077427  | 0.3994985858273239  | T | T | T |
|                    | 0.666666999999968  | 0.0833330000000032  | 0.0514190000000028  | F | F | F |

|                    |                    |                    |   |   |   |
|--------------------|--------------------|--------------------|---|---|---|
| 0.6678496236851501 | 0.0849828657010079 | 0.3145987793954177 | T | T | T |
| 0.5838344626062764 | 0.1670033403788409 | 0.2269115659404619 | T | T | T |
| 0.7500000000000000 | 0.0000000000000000 | 0.1392870000000030 | F | F | F |
| 0.7459740755381645 | 0.9960363932953982 | 0.3995933211951126 | T | T | T |
| 0.9166669999999968 | 0.0833330000000032 | 0.0514190000000028 | F | F | F |
| 0.9178669777463924 | 0.0821330222536005 | 0.3155220622205732 | T | T | T |
| 0.8334697696061539 | 0.1665302303938461 | 0.2270546178645247 | T | T | T |
| 0.0000000000000000 | 0.2500000000000000 | 0.1392870000000030 | F | F | F |
| 0.0039636067046018 | 0.2540259244618355 | 0.3995933211951126 | T | T | T |
| 0.1666669999999968 | 0.3333330000000032 | 0.0514190000000028 | F | F | F |
| 0.1665176394832457 | 0.3334838326545722 | 0.3129875377869169 | T | T | T |
| 0.0832336014956567 | 0.4167885279541537 | 0.2265441705909907 | T | T | T |
| 0.2500000000000000 | 0.2500000000000000 | 0.1392870000000030 | F | F | F |
| 0.2492174660318511 | 0.2507242112110859 | 0.3994102092104654 | T | T | T |
| 0.4166669999999968 | 0.3333330000000032 | 0.0514190000000028 | F | F | F |
| 0.4177142146846720 | 0.3349264071999229 | 0.3146536282211656 | T | T | T |
| 0.3337337320551725 | 0.4168441856040772 | 0.2267813541265511 | T | T | T |
| 0.5000000000000000 | 0.2500000000000000 | 0.1392870000000030 | F | F | F |
| 0.4957596085267255 | 0.2460671337995635 | 0.3998487530718364 | T | T | T |
| 0.6666669999999968 | 0.3333330000000032 | 0.0514190000000028 | F | F | F |
| 0.6676613973001579 | 0.3323386026998421 | 0.3157638233237066 | T | T | T |
| 0.5836482781514221 | 0.4163517218485779 | 0.2271075754237373 | T | T | T |
| 0.7500000000000000 | 0.2500000000000000 | 0.1392870000000030 | F | F | F |
| 0.9166669999999968 | 0.3333330000000032 | 0.0514190000000028 | F | F | F |
| 0.9150171342989921 | 0.3321503763148499 | 0.3145987793954177 | T | T | T |
| 0.8329966596211520 | 0.4161655373937236 | 0.2269115659404619 | T | T | T |
| 0.0000000000000000 | 0.5000000000000000 | 0.1392870000000030 | F | F | F |
| 0.9993492352922573 | 0.5006390285439082 | 0.3994985858273239 | T | T | T |
| 0.1666669999999968 | 0.5833330000000032 | 0.0514190000000028 | F | F | F |
| 0.1678401858216745 | 0.5849874235553614 | 0.3145980159541395 | T | T | T |
| 0.0838254275601145 | 0.6669999141928074 | 0.2269110991021321 | T | T | T |
| 0.2500000000000000 | 0.5000000000000000 | 0.1392870000000030 | F | F | F |
| 0.2458651605059714 | 0.4959784839228760 | 0.3996160269987428 | T | T | T |
| 0.4166669999999968 | 0.5833330000000032 | 0.0514190000000028 | F | F | F |
| 0.4178614480986340 | 0.5821385519013660 | 0.3155848995877975 | T | T | T |
| 0.3334680273596788 | 0.6665319726403212 | 0.2270667662017232 | T | T | T |
| 0.5000000000000000 | 0.5000000000000000 | 0.1392870000000030 | F | F | F |
| 0.6666669999999968 | 0.5833330000000032 | 0.0514190000000028 | F | F | F |
| 0.6650735928000771 | 0.5822857853153280 | 0.3146536282211656 | T | T | T |
| 0.5831558143959228 | 0.6662662679448275 | 0.2267813541265511 | T | T | T |
| 0.7500000000000000 | 0.5000000000000000 | 0.1392870000000030 | F | F | F |
| 0.7539328662004365 | 0.5042403914732674 | 0.3998487530718364 | T | T | T |
| 0.9166669999999968 | 0.5833330000000032 | 0.0514190000000028 | F | F | F |
| 0.9162230282934303 | 0.5838318759664460 | 0.3132714352925348 | T | T | T |
| 0.8332574985668657 | 0.6666836790813946 | 0.2264756095050942 | T | T | T |
| 0.0000000000000000 | 0.7500000000000000 | 0.1392870000000030 | F | F | F |
| 0.9957239222643324 | 0.7461147479246648 | 0.3998217511192124 | T | T | T |
| 0.1666669999999968 | 0.8333330000000032 | 0.0514190000000028 | F | F | F |
| 0.1676636015747235 | 0.8323363984252765 | 0.3157569716024398 | T | T | T |
| 0.0836647527943626 | 0.9163352472056374 | 0.2270910468094698 | T | T | T |
| 0.2500000000000000 | 0.7500000000000000 | 0.1392870000000030 | F | F | F |

|                    |                    |                     |                     |   |   |   |
|--------------------|--------------------|---------------------|---------------------|---|---|---|
|                    | 0.416666999999968  | 0.8333330000000032  | 0.0514190000000028  | F | F | F |
|                    | 0.4150125764446386 | 0.8321598141783255  | 0.3145980159541395  | T | T | T |
|                    | 0.3330000858071926 | 0.9161745724398855  | 0.2269110991021321  | T | T | T |
|                    | 0.5000000000000000 | 0.7500000000000000  | 0.1392870000000030  | F | F | F |
|                    | 0.5040215160771240 | 0.7541348394940286  | 0.3996160269987428  | T | T | T |
|                    | 0.666666999999968  | 0.8333330000000032  | 0.0514190000000028  | F | F | F |
|                    | 0.6665161673454278 | 0.8334823605167543  | 0.3129875377869169  | T | T | T |
|                    | 0.5832114720458463 | 0.9167663985043433  | 0.2265441705909907  | T | T | T |
|                    | 0.7500000000000000 | 0.7500000000000000  | 0.1392870000000030  | F | F | F |
|                    | 0.7492757887889141 | 0.7507825339681489  | 0.3994102092104654  | T | T | T |
|                    | 0.916666999999968  | 0.8333330000000032  | 0.0514190000000028  | F | F | F |
|                    | 0.9177706932848224 | 0.8349952678017161  | 0.3146510546491896  | T | T | T |
|                    | 0.8337461705340488 | 0.9168240774413619  | 0.2267553113052969  | T | T | T |
|                    | 0.9999006242338027 | 0.0000993757661973  | 0.4282511974960812  | T | T | T |
|                    | 0.7500159400637330 | 0.2499840599362670  | 0.4281024740610420  | T | T | T |
|                    | 0.2499433729824361 | 0.7500566270175710  | 0.4280606075950502  | T | T | T |
|                    | 0.4999008354952252 | 0.5000991645047748  | 0.4281737303171909  | T | T | T |
| <b>4Au/Ni(111)</b> | 1.0000000000000000 |                     |                     |   |   |   |
|                    | 8.6224000674449712 | -4.9781450000000014 | 0.0000000000000000  |   |   |   |
|                    | 0.0000000000000000 | 9.9562900000000010  | 0.0000000000000000  |   |   |   |
|                    | 0.0000000000000000 | 0.0000000000000000  | 23.1292800000000014 |   |   |   |
|                    | Ni                 | Au                  |                     |   |   |   |
|                    | 76                 | 4                   |                     |   |   |   |
|                    | Selective dynamics |                     |                     |   |   |   |
|                    | Direct             |                     |                     |   |   |   |
|                    | 0.0000000000000000 | 0.0000000000000000  | 0.1392870000000030  | F | F | F |
|                    | 0.166666999999968  | 0.0833330000000032  | 0.0514190000000028  | F | F | F |
|                    | 0.1667189885903611 | 0.0833557321580614  | 0.3144187897021880  | T | T | T |
|                    | 0.0832836172036622 | 0.1664522925282412  | 0.2268440800902027  | T | T | T |
|                    | 0.2500000000000000 | 0.0000000000000000  | 0.1392870000000030  | F | F | F |
|                    | 0.2546589171413984 | 0.0050055777792721  | 0.4011935791720802  | T | T | T |
|                    | 0.416666999999968  | 0.0833330000000032  | 0.0514190000000028  | F | F | F |
|                    | 0.4163774830218259 | 0.0836229975663159  | 0.3137023347224854  | T | T | T |
|                    | 0.3333356491653774 | 0.1666194621598933  | 0.2265080662534587  | T | T | T |
|                    | 0.5000000000000000 | 0.0000000000000000  | 0.1392870000000030  | F | F | F |
|                    | 0.4996241486014554 | 0.0003413916320767  | 0.4013566558675379  | T | T | T |
|                    | 0.666666999999968  | 0.0833330000000032  | 0.0514190000000028  | F | F | F |
|                    | 0.6671134413504376 | 0.0836891612534245  | 0.3144335537021377  | T | T | T |
|                    | 0.5837110083502211 | 0.1667926437203064  | 0.2268984367843458  | T | T | T |
|                    | 0.7500000000000000 | 0.0000000000000000  | 0.1392870000000030  | F | F | F |
|                    | 0.7451493239349176 | 0.9951989916112467  | 0.4011792754571459  | T | T | T |
|                    | 0.916666999999968  | 0.0833330000000032  | 0.0514190000000028  | F | F | F |
|                    | 0.9171755174944280 | 0.0828244825055720  | 0.3148775767730569  | T | T | T |
|                    | 0.8333711287214101 | 0.1666288712785899  | 0.2269914735863736  | T | T | T |
|                    | 0.0000000000000000 | 0.2500000000000000  | 0.1392870000000030  | F | F | F |
|                    | 0.0048010083887533 | 0.2548506760650824  | 0.4011792754571459  | T | T | T |
|                    | 0.166666999999968  | 0.3333330000000032  | 0.0514190000000028  | F | F | F |
|                    | 0.1665200513299112 | 0.3334922617034266  | 0.3135226940832965  | T | T | T |
|                    | 0.0833932723553730 | 0.4165007501109059  | 0.2266203460567624  | T | T | T |
|                    | 0.2500000000000000 | 0.2500000000000000  | 0.1392870000000030  | F | F | F |
|                    | 0.2494416353338451 | 0.2505423832415943  | 0.4014106765165479  | T | T | T |

|                    |                    |                    |   |   |   |
|--------------------|--------------------|--------------------|---|---|---|
| 0.416666999999968  | 0.333333000000032  | 0.051419000000028  | F | F | F |
| 0.4166531713415864 | 0.3332840071620922 | 0.3144212062716321 | T | T | T |
| 0.3335361060937601 | 0.4166872991031738 | 0.2268369614047430 | T | T | T |
| 0.500000000000000  | 0.250000000000000  | 0.1392870000000030 | F | F | F |
| 0.4949237335887986 | 0.2453179114549471 | 0.4012102525951278 | T | T | T |
| 0.666666999999968  | 0.333333000000032  | 0.051419000000028  | F | F | F |
| 0.6670355266568961 | 0.3329644733431039 | 0.3148777552949156 | T | T | T |
| 0.5835002608455468 | 0.4164997391544532 | 0.2269790309634914 | T | T | T |
| 0.750000000000000  | 0.250000000000000  | 0.1392870000000030 | F | F | F |
| 0.916666999999968  | 0.333333000000032  | 0.051419000000028  | F | F | F |
| 0.9163108387465755 | 0.3328865586495624 | 0.3144335537021377 | T | T | T |
| 0.8332073562796936 | 0.4162889916497789 | 0.2268984367843458 | T | T | T |
| 0.000000000000000  | 0.500000000000000  | 0.1392870000000030 | F | F | F |
| 0.9996586083679233 | 0.5003758513985446 | 0.4013566558675379 | T | T | T |
| 0.166666999999968  | 0.583333000000032  | 0.051419000000028  | F | F | F |
| 0.1670724856865817 | 0.5836397173627788 | 0.3144178106284485 | T | T | T |
| 0.0836666386539591 | 0.6667344014255079 | 0.2269032061727501 | T | T | T |
| 0.250000000000000  | 0.500000000000000  | 0.1392870000000030 | F | F | F |
| 0.2451449882775947 | 0.4951951380568644 | 0.4011561565971107 | T | T | T |
| 0.416666999999968  | 0.583333000000032  | 0.051419000000028  | F | F | F |
| 0.4171965087844143 | 0.5828034912155857 | 0.3148023449227253 | T | T | T |
| 0.3333911458349306 | 0.6666088541650694 | 0.2269723857093879 | T | T | T |
| 0.500000000000000  | 0.500000000000000  | 0.1392870000000030 | F | F | F |
| 0.666666999999968  | 0.583333000000032  | 0.051419000000028  | F | F | F |
| 0.6667159928379078 | 0.5833468286584136 | 0.3144212062716321 | T | T | T |
| 0.5833127008968262 | 0.6664638939062399 | 0.2268369614047430 | T | T | T |
| 0.750000000000000  | 0.500000000000000  | 0.1392870000000030 | F | F | F |
| 0.7546820885450529 | 0.5050762664112014 | 0.4012102525951278 | T | T | T |
| 0.916666999999968  | 0.583333000000032  | 0.051419000000028  | F | F | F |
| 0.9163770024336841 | 0.5836225169781741 | 0.3137023347224854 | T | T | T |
| 0.8333805378401067 | 0.6666643508346226 | 0.2265080662534587 | T | T | T |
| 0.000000000000000  | 0.750000000000000  | 0.1392870000000030 | F | F | F |
| 0.9949944222207279 | 0.7453410828586016 | 0.4011935791720802 | T | T | T |
| 0.166666999999968  | 0.833333000000032  | 0.051419000000028  | F | F | F |
| 0.1670233082098846 | 0.8329766917901154 | 0.3148749424223425 | T | T | T |
| 0.0835039665577497 | 0.9164960334422503 | 0.2269998627955374 | T | T | T |
| 0.250000000000000  | 0.750000000000000  | 0.1392870000000030 | F | F | F |
| 0.416666999999968  | 0.833333000000032  | 0.051419000000028  | F | F | F |
| 0.4163602826372212 | 0.8329275143134183 | 0.3144178106284485 | T | T | T |
| 0.3332655985744921 | 0.9163333613460409 | 0.2269032061727501 | T | T | T |
| 0.500000000000000  | 0.750000000000000  | 0.1392870000000030 | F | F | F |
| 0.5048048619431356 | 0.7548550117224053 | 0.4011561565971107 | T | T | T |
| 0.666666999999968  | 0.833333000000032  | 0.051419000000028  | F | F | F |
| 0.6665077382965734 | 0.8334799486700888 | 0.3135226940832965 | T | T | T |
| 0.5834992498890941 | 0.9166067276446270 | 0.2266203460567624 | T | T | T |
| 0.750000000000000  | 0.750000000000000  | 0.1392870000000030 | F | F | F |
| 0.7494576167584057 | 0.7505583646661549 | 0.4014106765165479 | T | T | T |
| 0.916666999999968  | 0.833333000000032  | 0.051419000000028  | F | F | F |
| 0.9166442678419386 | 0.8332810114096389 | 0.3144187897021880 | T | T | T |
| 0.8335477074717588 | 0.9167163827963378 | 0.2268440800902027 | T | T | T |
| 0.9999782906577011 | 0.0000217093422989 | 0.4190230366340515 | T | T | T |

|                    |                    |                     |                     |   |   |   |
|--------------------|--------------------|---------------------|---------------------|---|---|---|
|                    | 0.7499139035680358 | 0.2500860964319642  | 0.4188262411717005  | T | T | T |
|                    | 0.2499471273562079 | 0.7500528726437921  | 0.4187947056206909  | T | T | T |
|                    | 0.4999454572851292 | 0.5000545427148708  | 0.4189647369989942  | T | T | T |
| <b>4Ni/Cu(111)</b> | 1.0000000000000000 |                     |                     |   |   |   |
|                    | 8.8905944857135406 | -5.1329871195825199 | -0.0000000000000010 |   |   |   |
|                    | 0.0000000000000000 | 10.2659742391650006 | 0.0000000000000010  |   |   |   |
|                    | 0.0000000000000000 | 0.0000000000000000  | 23.3821328661704015 |   |   |   |
|                    | Ni                 | Cu                  |                     |   |   |   |
|                    | 4                  | 76                  |                     |   |   |   |
|                    | Selective dynamics |                     |                     |   |   |   |
|                    | Direct             |                     |                     |   |   |   |
|                    | 0.9997784609196998 | 0.0002215390803002  | 0.3796538981583595  | T | T | T |
|                    | 0.7497784609196998 | 0.2502215390803002  | 0.3796538981583595  | T | T | T |
|                    | 0.4997784609196998 | 0.5002215390803002  | 0.3796538981583595  | T | T | T |
|                    | 0.2497784609196998 | 0.7502215390803002  | 0.3796538981583595  | T | T | T |
|                    | 0.0000000000000000 | 0.0000000000000000  | 0.1155258754999977  | F | F | F |
|                    | 0.1666666667000030 | 0.083333332999970   | 0.0259047434999999  | F | F | F |
|                    | 0.1665429991606615 | 0.0832957124631903  | 0.2943411542649201  | T | T | T |
|                    | 0.0834126960975752 | 0.1668188223540596  | 0.2048231934532794  | T | T | T |
|                    | 0.2500000000000000 | 0.0000000000000000  | 0.1155258754999977  | F | F | F |
|                    | 0.2484768480079964 | 0.9987276777489669  | 0.3833428573880013  | T | T | T |
|                    | 0.4166666667000030 | 0.083333332999970   | 0.0259047434999999  | F | F | F |
|                    | 0.4165940614030106 | 0.0834059385969894  | 0.2944900216098532  | T | T | T |
|                    | 0.3333331422537498 | 0.1666668577462502  | 0.2051729617688096  | T | T | T |
|                    | 0.5000000000000000 | 0.0000000000000000  | 0.1155258754999977  | F | F | F |
|                    | 0.4999758365288827 | 0.0000241634711173  | 0.3832443332109534  | T | T | T |
|                    | 0.6666666667000030 | 0.083333332999970   | 0.0259047434999999  | F | F | F |
|                    | 0.6667042875368097 | 0.0834570008393314  | 0.2943411542649201  | T | T | T |
|                    | 0.5831811776459404 | 0.1665873039024248  | 0.2048231934532794  | T | T | T |
|                    | 0.7500000000000000 | 0.0000000000000000  | 0.1155258754999977  | F | F | F |
|                    | 0.7512723222510331 | 0.0015231519920036  | 0.3833428573880013  | T | T | T |
|                    | 0.9166666667000030 | 0.083333332999970   | 0.0259047434999999  | F | F | F |
|                    | 0.9167102089571202 | 0.0832897910428798  | 0.2941644844119011  | T | T | T |
|                    | 0.8334346749443284 | 0.1665653250556716  | 0.2048505140800714  | T | T | T |
|                    | 0.0000000000000000 | 0.2500000000000000  | 0.1155258754999977  | F | F | F |
|                    | 0.9984768480079964 | 0.2487276777489669  | 0.3833428573880013  | T | T | T |
|                    | 0.1666666667000030 | 0.333333332999970   | 0.0259047434999999  | F | F | F |
|                    | 0.1665940614030106 | 0.3334059385969894  | 0.2944900216098532  | T | T | T |
|                    | 0.0833331422537498 | 0.4166668577462502  | 0.2051729617688096  | T | T | T |
|                    | 0.2500000000000000 | 0.2500000000000000  | 0.1155258754999977  | F | F | F |
|                    | 0.2499758365288827 | 0.2500241634711173  | 0.3832443332109534  | T | T | T |
|                    | 0.4166666667000030 | 0.333333332999970   | 0.0259047434999999  | F | F | F |
|                    | 0.4167042875368097 | 0.3334570008393314  | 0.2943411542649201  | T | T | T |
|                    | 0.3331811776459404 | 0.4165873039024248  | 0.2048231934532794  | T | T | T |
|                    | 0.5000000000000000 | 0.2500000000000000  | 0.1155258754999977  | F | F | F |
|                    | 0.5012723222510331 | 0.2515231519920036  | 0.3833428573880013  | T | T | T |
|                    | 0.6666666667000030 | 0.333333332999970   | 0.0259047434999999  | F | F | F |
|                    | 0.6667102089571202 | 0.3332897910428798  | 0.2941644844119011  | T | T | T |
|                    | 0.5834346749443284 | 0.4165653250556716  | 0.2048505140800714  | T | T | T |
|                    | 0.7500000000000000 | 0.2500000000000000  | 0.1155258754999977  | F | F | F |
|                    | 0.9166666667000030 | 0.333333332999970   | 0.0259047434999999  | F | F | F |

|                    |                    |                     |                     |   |   |   |
|--------------------|--------------------|---------------------|---------------------|---|---|---|
|                    | 0.9165429991606686 | 0.3332957124631903  | 0.2943411542649201  | T | T | T |
|                    | 0.8334126960975752 | 0.4168188223540596  | 0.2048231934532794  | T | T | T |
|                    | 0.0000000000000000 | 0.5000000000000000  | 0.1155258754999977  | F | F | F |
|                    | 0.9999758365288827 | 0.5000241634711173  | 0.3832443332109534  | T | T | T |
|                    | 0.1666666667000030 | 0.5833333332999970  | 0.0259047434999999  | F | F | F |
|                    | 0.1667042875368097 | 0.5834570008393314  | 0.2943411542649201  | T | T | T |
|                    | 0.0831811776459404 | 0.6665873039024248  | 0.2048231934532794  | T | T | T |
|                    | 0.2500000000000000 | 0.5000000000000000  | 0.1155258754999977  | F | F | F |
|                    | 0.2512723222510331 | 0.5015231519920036  | 0.3833428573880013  | T | T | T |
|                    | 0.4166666667000030 | 0.5833333332999970  | 0.0259047434999999  | F | F | F |
|                    | 0.4167102089571202 | 0.5832897910428798  | 0.2941644844119011  | T | T | T |
|                    | 0.3334346749443284 | 0.6665653250556716  | 0.2048505140800714  | T | T | T |
|                    | 0.5000000000000000 | 0.5000000000000000  | 0.1155258754999977  | F | F | F |
|                    | 0.6666666667000030 | 0.5833333332999970  | 0.0259047434999999  | F | F | F |
|                    | 0.6665429991606686 | 0.5832957124631903  | 0.2943411542649201  | T | T | T |
|                    | 0.5834126960975752 | 0.6668188223540596  | 0.2048231934532794  | T | T | T |
|                    | 0.7500000000000000 | 0.5000000000000000  | 0.1155258754999977  | F | F | F |
|                    | 0.7484768480079964 | 0.4987276777489669  | 0.3833428573880013  | T | T | T |
|                    | 0.9166666667000030 | 0.5833333332999970  | 0.0259047434999999  | F | F | F |
|                    | 0.9165940614030106 | 0.5834059385969894  | 0.2944900216098532  | T | T | T |
|                    | 0.8333331422537498 | 0.6666668577462502  | 0.2051729617688096  | T | T | T |
|                    | 0.0000000000000000 | 0.7500000000000000  | 0.1155258754999977  | F | F | F |
|                    | 0.0012723222510331 | 0.7515231519920036  | 0.3833428573880013  | T | T | T |
|                    | 0.1666666667000030 | 0.8333333332999970  | 0.0259047434999999  | F | F | F |
|                    | 0.1667102089571202 | 0.8332897910428798  | 0.2941644844119011  | T | T | T |
|                    | 0.0834346749443284 | 0.9165653250556716  | 0.2048505140800714  | T | T | T |
|                    | 0.2500000000000000 | 0.7500000000000000  | 0.1155258754999977  | F | F | F |
|                    | 0.4166666667000030 | 0.8333333332999970  | 0.0259047434999999  | F | F | F |
|                    | 0.4165429991606686 | 0.8332957124631903  | 0.2943411542649201  | T | T | T |
|                    | 0.3334126960975752 | 0.9168188223540596  | 0.2048231934532794  | T | T | T |
|                    | 0.5000000000000000 | 0.7500000000000000  | 0.1155258754999977  | F | F | F |
|                    | 0.4984768480079964 | 0.7487276777489669  | 0.3833428573880013  | T | T | T |
|                    | 0.6666666667000030 | 0.8333333332999970  | 0.0259047434999999  | F | F | F |
|                    | 0.6665940614030106 | 0.8334059385969894  | 0.2944900216098532  | T | T | T |
|                    | 0.5833331422537498 | 0.9166668577462502  | 0.2051729617688096  | T | T | T |
|                    | 0.7500000000000000 | 0.7500000000000000  | 0.1155258754999977  | F | F | F |
|                    | 0.7499758365288827 | 0.7500241634711173  | 0.3832443332109534  | T | T | T |
|                    | 0.9166666667000030 | 0.8333333332999970  | 0.0259047434999999  | F | F | F |
|                    | 0.9167042875368097 | 0.8334570008393314  | 0.2943411542649201  | T | T | T |
|                    | 0.8331811776459404 | 0.9165873039024248  | 0.2048231934532794  | T | T | T |
| <b>4Pd/Cu(111)</b> | 1.0000000000000000 |                     |                     |   |   |   |
|                    | 8.8905944857135406 | -5.1329871195825199 | -0.0000000000000010 |   |   |   |
|                    | 0.0000000000000000 | 10.2659742391650006 | 0.0000000000000010  |   |   |   |
|                    | 0.0000000000000000 | 0.0000000000000000  | 23.3821328661704015 |   |   |   |
|                    | Pd                 | Cu                  |                     |   |   |   |
|                    | 4                  | 76                  |                     |   |   |   |
|                    | Selective dynamics |                     |                     |   |   |   |
|                    | Direct             |                     |                     |   |   |   |
|                    | 0.9999428349105983 | 0.0000571650894017  | 0.3864796773750641  | T | T | T |
|                    | 0.7499428349105983 | 0.2500571650894017  | 0.3864796773750641  | T | T | T |
|                    | 0.4999428349105983 | 0.5000571650894017  | 0.3864796773750641  | T | T | T |



|                    |                    |                    |   |   |   |
|--------------------|--------------------|--------------------|---|---|---|
| 0.2499428349105983 | 0.7500571650894017 | 0.3864796773750641 | T | T | T |
| 0.0000000000000000 | 0.0000000000000000 | 0.1155258754999977 | F | F | F |
| 0.1666666667000030 | 0.0833333332999970 | 0.0259047434999999 | F | F | F |
| 0.1671974507504004 | 0.0835731418903052 | 0.2939606943169792 | T | T | T |
| 0.0832900187667889 | 0.1667383384902266 | 0.2048177204012092 | T | T | T |
| 0.2500000000000000 | 0.0000000000000000 | 0.1155258754999977 | F | F | F |
| 0.2528436892315682 | 0.0029478738780853 | 0.3838847218772656 | T | T | T |
| 0.4166666667000030 | 0.0833333332999970 | 0.0259047434999999 | F | F | F |
| 0.4169117138029748 | 0.0830882861970252 | 0.2943084339339634 | T | T | T |
| 0.3333478616688836 | 0.1666521383311164 | 0.2051799936430641 | T | T | T |
| 0.5000000000000000 | 0.0000000000000000 | 0.1155258754999977 | F | F | F |
| 0.5000203254208131 | 0.9999796745791869 | 0.3838861105165137 | T | T | T |
| 0.6666666667000030 | 0.0833333332999970 | 0.0259047434999999 | F | F | F |
| 0.6664268581096948 | 0.0828025492495996 | 0.2939606943169792 | T | T | T |
| 0.5832616615097734 | 0.1667099812332111 | 0.2048177204012092 | T | T | T |
| 0.7500000000000000 | 0.0000000000000000 | 0.1155258754999977 | F | F | F |
| 0.7470521261219147 | 0.9971563107684318 | 0.3838847218772656 | T | T | T |
| 0.9166666667000030 | 0.0833333332999970 | 0.0259047434999999 | F | F | F |
| 0.9162134810054354 | 0.0837865189945646 | 0.2940768239791680 | T | T | T |
| 0.8334570887505919 | 0.1665429112494081 | 0.2047307243721690 | T | T | T |
| 0.0000000000000000 | 0.2500000000000000 | 0.1155258754999977 | F | F | F |
| 0.0028436892315682 | 0.2529478738780782 | 0.3838847218772656 | T | T | T |
| 0.1666666667000030 | 0.3333333332999970 | 0.0259047434999999 | F | F | F |
| 0.1669117138029748 | 0.3330882861970252 | 0.2943084339339634 | T | T | T |
| 0.0833478616688836 | 0.4166521383311164 | 0.2051799936430641 | T | T | T |
| 0.2500000000000000 | 0.2500000000000000 | 0.1155258754999977 | F | F | F |
| 0.2500203254208131 | 0.2499796745791869 | 0.3838861105165137 | T | T | T |
| 0.4166666667000030 | 0.3333333332999970 | 0.0259047434999999 | F | F | F |
| 0.4164268581096948 | 0.3328025492495996 | 0.2939606943169792 | T | T | T |
| 0.3332616615097734 | 0.4167099812332111 | 0.2048177204012092 | T | T | T |
| 0.5000000000000000 | 0.2500000000000000 | 0.1155258754999977 | F | F | F |
| 0.4970521261219218 | 0.2471563107684318 | 0.3838847218772656 | T | T | T |
| 0.6666666667000030 | 0.3333333332999970 | 0.0259047434999999 | F | F | F |
| 0.6662134810054354 | 0.3337865189945646 | 0.2940768239791680 | T | T | T |
| 0.5834570887505919 | 0.4165429112494081 | 0.2047307243721690 | T | T | T |
| 0.7500000000000000 | 0.2500000000000000 | 0.1155258754999977 | F | F | F |
| 0.9166666667000030 | 0.3333333332999970 | 0.0259047434999999 | F | F | F |
| 0.9171974507504004 | 0.3335731418903052 | 0.2939606943169792 | T | T | T |
| 0.8332900187667889 | 0.4167383384902266 | 0.2048177204012092 | T | T | T |
| 0.0000000000000000 | 0.5000000000000000 | 0.1155258754999977 | F | F | F |
| 0.0000203254208131 | 0.4999796745791869 | 0.3838861105165137 | T | T | T |
| 0.1666666667000030 | 0.5833333332999970 | 0.0259047434999999 | F | F | F |
| 0.1664268581096948 | 0.5828025492495996 | 0.2939606943169792 | T | T | T |
| 0.0832616615097734 | 0.6667099812332111 | 0.2048177204012092 | T | T | T |
| 0.2500000000000000 | 0.5000000000000000 | 0.1155258754999977 | F | F | F |
| 0.2470521261219147 | 0.4971563107684318 | 0.3838847218772656 | T | T | T |
| 0.4166666667000030 | 0.5833333332999970 | 0.0259047434999999 | F | F | F |
| 0.4162134810054354 | 0.5837865189945646 | 0.2940768239791680 | T | T | T |
| 0.3334570887505919 | 0.6665429112494081 | 0.2047307243721690 | T | T | T |
| 0.5000000000000000 | 0.5000000000000000 | 0.1155258754999977 | F | F | F |
| 0.6666666667000030 | 0.5833333332999970 | 0.0259047434999999 | F | F | F |

|                    |                                                                |
|--------------------|----------------------------------------------------------------|
|                    | 0.6671974507504004 0.5835731418903052 0.2939606943169792 T T T |
|                    | 0.5832900187667889 0.6667383384902266 0.2048177204012092 T T T |
|                    | 0.7500000000000000 0.5000000000000000 0.1155258754999977 F F F |
|                    | 0.7528436892315682 0.5029478738780853 0.3838847218772656 T T T |
|                    | 0.9166666667000030 0.5833333332999970 0.0259047434999999 F F F |
|                    | 0.9169117138029748 0.5830882861970252 0.2943084339339634 T T T |
|                    | 0.8333478616688836 0.6666521383311164 0.2051799936430641 T T T |
|                    | 0.0000000000000000 0.7500000000000000 0.1155258754999977 F F F |
|                    | 0.9970521261219147 0.7471563107684318 0.3838847218772656 T T T |
|                    | 0.1666666667000030 0.8333333332999970 0.0259047434999999 F F F |
|                    | 0.1662134810054354 0.8337865189945646 0.2940768239791680 T T T |
|                    | 0.0834570887505919 0.9165429112494081 0.2047307243721690 T T T |
|                    | 0.2500000000000000 0.7500000000000000 0.1155258754999977 F F F |
|                    | 0.4166666667000030 0.8333333332999970 0.0259047434999999 F F F |
|                    | 0.4171974507504004 0.8335731418903052 0.2939606943169792 T T T |
|                    | 0.3332900187667889 0.9167383384902266 0.2048177204012092 T T T |
|                    | 0.5000000000000000 0.7500000000000000 0.1155258754999977 F F F |
|                    | 0.5028436892315682 0.7529478738780853 0.3838847218772656 T T T |
|                    | 0.6666666667000030 0.8333333332999970 0.0259047434999999 F F F |
|                    | 0.6669117138029748 0.8330882861970252 0.2943084339339634 T T T |
|                    | 0.5833478616688836 0.9166521383311164 0.2051799936430641 T T T |
|                    | 0.7500000000000000 0.7500000000000000 0.1155258754999977 F F F |
|                    | 0.7500203254208131 0.7499796745791869 0.3838861105165137 T T T |
|                    | 0.9166666667000030 0.8333333332999970 0.0259047434999999 F F F |
|                    | 0.9164268581096948 0.8328025492495996 0.2939606943169792 T T T |
|                    | 0.8332616615097734 0.9167099812332111 0.2048177204012092 T T T |
| <b>4Pt/Cu(111)</b> | 1.0000000000000000                                             |
|                    | 8.8905944857135406 -5.1329871195825199 -0.0000000000000010     |
|                    | 0.0000000000000000 10.2659742391650006 0.0000000000000010      |
|                    | 0.0000000000000000 0.0000000000000000 23.3821328661704015      |
|                    | Pt Cu                                                          |
|                    | 4 76                                                           |
|                    | Selective dynamics                                             |
|                    | Direct                                                         |
|                    | 0.9998012187100187 0.0001987812899742 0.3845995289849142 T T T |
|                    | 0.7498012187100187 0.2501987812899742 0.3845995289849142 T T T |
|                    | 0.4998012187100258 0.5001987812899813 0.3845995289849142 T T T |
|                    | 0.2498012187100258 0.7501987812899813 0.3845995289849142 T T T |
|                    | 0.0000000000000000 0.0000000000000000 0.1155258754999977 F F F |
|                    | 0.1666666667000030 0.0833333332999970 0.0259047434999999 F F F |
|                    | 0.1685701865874734 0.0843017626493605 0.2939868437635340 T T T |
|                    | 0.0834789157136910 0.1669523485021571 0.2049003424728895 T T T |
|                    | 0.2500000000000000 0.0000000000000000 0.1155258754999977 F F F |
|                    | 0.2516906982302416 0.0020071517158371 0.3857520004441071 T T T |
|                    | 0.4166666667000030 0.0833333332999970 0.0259047434999999 F F F |
|                    | 0.4167850539350795 0.0832149460649205 0.2949792047641822 T T T |
|                    | 0.3333926215165022 0.1666073784834978 0.2052496119301424 T T T |
|                    | 0.5000000000000000 0.0000000000000000 0.1155258754999977 F F F |
|                    | 0.5000326404443527 0.9999673595556473 0.3860594481758497 T T T |
|                    | 0.6666666667000030 0.0833333332999970 0.0259047434999999 F F F |
|                    | 0.6656982373506395 0.0814298134125266 0.2939868437635340 T T T |

|                    |                    |                    |   |   |   |
|--------------------|--------------------|--------------------|---|---|---|
| 0.5830476514978429 | 0.1665210842863090 | 0.2049003424728895 | T | T | T |
| 0.7500000000000000 | 0.0000000000000000 | 0.1155258754999977 | F | F | F |
| 0.7479928482841629 | 0.9983093017697584 | 0.3857520004441071 | T | T | T |
| 0.9166666667000030 | 0.0833333332999970 | 0.0259047434999999 | F | F | F |
| 0.9159519092998067 | 0.0840480907001933 | 0.2936897353728085 | T | T | T |
| 0.8334585541487911 | 0.1665414458512089 | 0.2048210630103284 | T | T | T |
| 0.0000000000000000 | 0.2500000000000000 | 0.1155258754999977 | F | F | F |
| 0.0016906982302416 | 0.2520071517158371 | 0.3857520004441071 | T | T | T |
| 0.1666666667000030 | 0.3333333332999970 | 0.0259047434999999 | F | F | F |
| 0.1667850539350795 | 0.3332149460649205 | 0.2949792047641822 | T | T | T |
| 0.0833926215165022 | 0.4166073784834978 | 0.2052496119301424 | T | T | T |
| 0.2500000000000000 | 0.2500000000000000 | 0.1155258754999977 | F | F | F |
| 0.2500326404443527 | 0.2499673595556473 | 0.3860594481758497 | T | T | T |
| 0.4166666667000030 | 0.3333333332999970 | 0.0259047434999999 | F | F | F |
| 0.4156982373506395 | 0.3314298134125266 | 0.2939868437635340 | T | T | T |
| 0.3330476514978429 | 0.4165210842863090 | 0.2049003424728895 | T | T | T |
| 0.5000000000000000 | 0.2500000000000000 | 0.1155258754999977 | F | F | F |
| 0.4979928482841629 | 0.2483093017697584 | 0.3857520004441071 | T | T | T |
| 0.6666666667000030 | 0.3333333332999970 | 0.0259047434999999 | F | F | F |
| 0.6659519092998067 | 0.3340480907001933 | 0.2936897353728085 | T | T | T |
| 0.5834585541487911 | 0.4165414458512089 | 0.2048210630103284 | T | T | T |
| 0.7500000000000000 | 0.2500000000000000 | 0.1155258754999977 | F | F | F |
| 0.9166666667000030 | 0.3333333332999970 | 0.0259047434999999 | F | F | F |
| 0.9185701865874734 | 0.3343017626493605 | 0.2939868437635340 | T | T | T |
| 0.8334789157136910 | 0.4169523485021571 | 0.2049003424728895 | T | T | T |
| 0.0000000000000000 | 0.5000000000000000 | 0.1155258754999977 | F | F | F |
| 0.0000326404443527 | 0.4999673595556473 | 0.3860594481758497 | T | T | T |
| 0.1666666667000030 | 0.5833333332999970 | 0.0259047434999999 | F | F | F |
| 0.1656982373506395 | 0.5814298134125266 | 0.2939868437635340 | T | T | T |
| 0.0830476514978429 | 0.6665210842863090 | 0.2049003424728895 | T | T | T |
| 0.2500000000000000 | 0.5000000000000000 | 0.1155258754999977 | F | F | F |
| 0.2479928482841629 | 0.4983093017697584 | 0.3857520004441071 | T | T | T |
| 0.4166666667000030 | 0.5833333332999970 | 0.0259047434999999 | F | F | F |
| 0.4159519092998067 | 0.5840480907001933 | 0.2936897353728085 | T | T | T |
| 0.3334585541487911 | 0.6665414458512089 | 0.2048210630103284 | T | T | T |
| 0.5000000000000000 | 0.5000000000000000 | 0.1155258754999977 | F | F | F |
| 0.6666666667000030 | 0.5833333332999970 | 0.0259047434999999 | F | F | F |
| 0.6685701865874734 | 0.5843017626493605 | 0.2939868437635340 | T | T | T |
| 0.5834789157136910 | 0.6669523485021571 | 0.2049003424728895 | T | T | T |
| 0.7500000000000000 | 0.5000000000000000 | 0.1155258754999977 | F | F | F |
| 0.7516906982302416 | 0.5020071517158371 | 0.3857520004441071 | T | T | T |
| 0.9166666667000030 | 0.5833333332999970 | 0.0259047434999999 | F | F | F |
| 0.9167850539350795 | 0.5832149460649205 | 0.2949792047641822 | T | T | T |
| 0.8333926215165022 | 0.6666073784834978 | 0.2052496119301424 | T | T | T |
| 0.0000000000000000 | 0.7500000000000000 | 0.1155258754999977 | F | F | F |
| 0.9979928482841629 | 0.7483093017697584 | 0.3857520004441071 | T | T | T |
| 0.1666666667000030 | 0.8333333332999970 | 0.0259047434999999 | F | F | F |
| 0.1659519092998067 | 0.8340480907001933 | 0.2936897353728085 | T | T | T |
| 0.0834585541487911 | 0.9165414458512089 | 0.2048210630103284 | T | T | T |
| 0.2500000000000000 | 0.7500000000000000 | 0.1155258754999977 | F | F | F |
| 0.4166666667000030 | 0.8333333332999970 | 0.0259047434999999 | F | F | F |

|                    |                    |                     |                     |   |   |   |
|--------------------|--------------------|---------------------|---------------------|---|---|---|
|                    | 0.4185701865874734 | 0.8343017626493605  | 0.2939868437635340  | T | T | T |
|                    | 0.3334789157136910 | 0.9169523485021571  | 0.2049003424728895  | T | T | T |
|                    | 0.5000000000000000 | 0.7500000000000000  | 0.1155258754999977  | F | F | F |
|                    | 0.5016906982302416 | 0.7520071517158371  | 0.3857520004441071  | T | T | T |
|                    | 0.6666666667000030 | 0.833333332999970   | 0.0259047434999999  | F | F | F |
|                    | 0.6667850539350795 | 0.8332149460649205  | 0.2949792047641822  | T | T | T |
|                    | 0.5833926215165022 | 0.9166073784834978  | 0.2052496119301424  | T | T | T |
|                    | 0.7500000000000000 | 0.7500000000000000  | 0.1155258754999977  | F | F | F |
|                    | 0.7500326404443527 | 0.7499673595556473  | 0.3860594481758497  | T | T | T |
|                    | 0.9166666667000030 | 0.833333332999970   | 0.0259047434999999  | F | F | F |
|                    | 0.9156982373506395 | 0.8314298134125266  | 0.2939868437635340  | T | T | T |
|                    | 0.8330476514978429 | 0.9165210842863090  | 0.2049003424728895  | T | T | T |
| <b>(9) 4X-S2</b>   |                    |                     |                     |   |   |   |
| <b>4Cu/Ni(111)</b> | 1.0000000000000000 |                     |                     |   |   |   |
|                    | 8.6224000674449712 | -4.9781450000000014 | 0.0000000000000000  |   |   |   |
|                    | 0.0000000000000000 | 9.9562900000000010  | 0.0000000000000000  |   |   |   |
|                    | 0.0000000000000000 | 0.0000000000000000  | 23.1292800000000014 |   |   |   |
|                    | Ni                 | Cu                  |                     |   |   |   |
|                    | 76                 | 4                   |                     |   |   |   |
|                    | Selective dynamics |                     |                     |   |   |   |
|                    | Direct             |                     |                     |   |   |   |
|                    | 0.0000000000000000 | 0.0000000000000000  | 0.1392870000000030  | F | F | F |
|                    | 0.1666669999999968 | 0.0833330000000032  | 0.0514190000000028  | F | F | F |
|                    | 0.1666053440092368 | 0.0833288158301194  | 0.3145626757148723  | T | T | T |
|                    | 0.0833710957228083 | 0.1667354728908353  | 0.2269475638352529  | T | T | T |
|                    | 0.2500000000000000 | 0.0000000000000000  | 0.1392870000000030  | F | F | F |
|                    | 0.2498984294770110 | 0.9997399193043417  | 0.4007941645034256  | T | T | T |
|                    | 0.4166669999999968 | 0.0833330000000032  | 0.0514190000000028  | F | F | F |
|                    | 0.4166892162498055 | 0.0833117333997646  | 0.3145253024191982  | T | T | T |
|                    | 0.3333220608885719 | 0.1666877624956553  | 0.2264188471239018  | T | T | T |
|                    | 0.5000000000000000 | 0.0000000000000000  | 0.1392870000000030  | F | F | F |
|                    | 0.6666669999999968 | 0.0833330000000032  | 0.0514190000000028  | F | F | F |
|                    | 0.6666329207867698 | 0.0833164677452168  | 0.3144971288657586  | T | T | T |
|                    | 0.5833663054967477 | 0.1667455906551569  | 0.2269431814872879  | T | T | T |
|                    | 0.7500000000000000 | 0.0000000000000000  | 0.1392870000000030  | F | F | F |
|                    | 0.7499095682552692 | -0.0002374992826327 | 0.4007668762257069  | T | T | T |
|                    | 0.9166669999999968 | 0.0833330000000032  | 0.0514190000000028  | F | F | F |
|                    | 0.9166794563197885 | 0.0833205436802114  | 0.3144906761941451  | T | T | T |
|                    | 0.8333312417372712 | 0.1666687582627285  | 0.2263666313954749  | T | T | T |
|                    | 0.0000000000000000 | 0.2500000000000000  | 0.1392870000000030  | F | F | F |
|                    | 0.0002374992826328 | 0.2500904317447305  | 0.4007668762257069  | T | T | T |
|                    | 0.1666669999999968 | 0.3333330000000032  | 0.0514190000000028  | F | F | F |
|                    | 0.1666669567217709 | 0.3333325037147362  | 0.3143684690037975  | T | T | T |
|                    | 0.0833759088800525 | 0.4166249263297391  | 0.2269412312039739  | T | T | T |
|                    | 0.2500000000000000 | 0.2500000000000000  | 0.1392870000000030  | F | F | F |
|                    | 0.2498924288043506 | 0.2501004359608606  | 0.4008536182373181  | T | T | T |
|                    | 0.4166669999999968 | 0.3333330000000032  | 0.0514190000000028  | F | F | F |
|                    | 0.4166762198751384 | 0.3333971265053363  | 0.3145689858182567  | T | T | T |
|                    | 0.3332648847552748 | 0.4166322987113827  | 0.2269485408613772  | T | T | T |
|                    | 0.5000000000000000 | 0.2500000000000000  | 0.1392870000000030  | F | F | F |
|                    | 0.5002446252108186 | 0.2500864136577286  | 0.4008026489567150  | T | T | T |

|                    |                     |                    |   |   |   |
|--------------------|---------------------|--------------------|---|---|---|
| 0.666666999999968  | 0.333333000000032   | 0.051419000000028  | F | F | F |
| 0.6666667953878583 | 0.3333332046121411  | 0.3143639679839920 | T | T | T |
| 0.5833671617902183 | 0.4166328382097816  | 0.2269486401789896 | T | T | T |
| 0.7500000000000000 | 0.2500000000000000  | 0.1392870000000030 | F | F | F |
| 0.7499156352136335 | 0.2500843647863663  | 0.4007768160578571 | T | T | T |
| 0.916666999999968  | 0.333333000000032   | 0.051419000000028  | F | F | F |
| 0.9166835322547833 | 0.3333670792132299  | 0.3144971288657586 | T | T | T |
| 0.8332544093448430 | 0.4166336945032528  | 0.2269431814872879 | T | T | T |
| 0.0000000000000000 | 0.5000000000000000  | 0.1392870000000030 | F | F | F |
| 0.166666999999968  | 0.583333000000032   | 0.051419000000028  | F | F | F |
| 0.1666305383265166 | 0.5833106260937060  | 0.3145054272553150 | T | T | T |
| 0.0833623774481307 | 0.6667405466112514  | 0.2269440969192871 | T | T | T |
| 0.2500000000000000 | 0.5000000000000000  | 0.1392870000000030 | F | F | F |
| 0.2499163060433183 | 0.4997574723081372  | 0.4007855494418689 | T | T | T |
| 0.416666999999968  | 0.583333000000032   | 0.051419000000028  | F | F | F |
| 0.4166874557479552 | 0.5833125442520445  | 0.3145160209594569 | T | T | T |
| 0.3333334629799770 | 0.6666665370200240  | 0.2263807075301084 | T | T | T |
| 0.5000000000000000 | 0.5000000000000000  | 0.1392870000000030 | F | F | F |
| 0.666666999999968  | 0.583333000000032   | 0.051419000000028  | F | F | F |
| 0.6666028734946640 | 0.5833237801248625  | 0.3145689858182567 | T | T | T |
| 0.5833677012886176 | 0.6667351152447261  | 0.2269485408613772 | T | T | T |
| 0.7500000000000000 | 0.5000000000000000  | 0.1392870000000030 | F | F | F |
| 0.7499135863422715 | 0.4997553747891816  | 0.4008026489567150 | T | T | T |
| 0.916666999999968  | 0.583333000000032   | 0.051419000000028  | F | F | F |
| 0.9166882666002351 | 0.5833107837501946  | 0.3145253024191982 | T | T | T |
| 0.8333112375043474 | 0.6666779391114279  | 0.2264188471239018 | T | T | T |
| 0.0000000000000000 | 0.7500000000000000  | 0.1392870000000030 | F | F | F |
| 0.0002600806956580 | 0.7501015705229885  | 0.4007941645034256 | T | T | T |
| 0.166666999999968  | 0.833333000000032   | 0.051419000000028  | F | F | F |
| 0.1666665051064956 | 0.8333334948935045  | 0.3143548573033017 | T | T | T |
| 0.0833676674952222 | 0.9166323325047775  | 0.2269486250015743 | T | T | T |
| 0.2500000000000000 | 0.7500000000000000  | 0.1392870000000030 | F | F | F |
| 0.2499135113605152 | 0.7500864886394846  | 0.4007682291363339 | T | T | T |
| 0.416666999999968  | 0.833333000000032   | 0.051419000000028  | F | F | F |
| 0.4166893739062945 | 0.8333694616734832  | 0.3145054272553150 | T | T | T |
| 0.3332594533887487 | 0.9166376225518690  | 0.2269440969192871 | T | T | T |
| 0.5000000000000000 | 0.7500000000000000  | 0.1392870000000030 | F | F | F |
| 0.5002425276918632 | 0.7500836939566820  | 0.4007855494418689 | T | T | T |
| 0.666666999999968  | 0.833333000000032   | 0.051419000000028  | F | F | F |
| 0.6666674962852637 | 0.8333330432782290  | 0.3143684690037975 | T | T | T |
| 0.5833750736702604 | 0.9166240911199474  | 0.2269412312039739 | T | T | T |
| 0.7500000000000000 | 0.7500000000000000  | 0.1392870000000030 | F | F | F |
| 0.7498995640391403 | 0.7501075711956497  | 0.4008536182373181 | T | T | T |
| 0.916666999999968  | 0.833333000000032   | 0.051419000000028  | F | F | F |
| 0.9166711841698806 | 0.8333946559907638  | 0.3145626757148723 | T | T | T |
| 0.8332645271091643 | 0.9166289042771912  | 0.2269475638352529 | T | T | T |
| 0.5000220932487905 | -0.0000228450215780 | 0.4061454886823070 | T | T | T |
| 0.0000228450215781 | 0.4999779067512094  | 0.4061454886823070 | T | T | T |
| 0.0000004667423116 | -0.0000004667423117 | 0.4061685692224705 | T | T | T |
| 0.5000110531430846 | 0.4999889468569158  | 0.4061802800070165 | T | T | T |
| <b>4Ag/Ni(111)</b> | 1.0000000000000000  |                    |   |   |   |

8.6224000674449712 -4.9781450000000014 0.0000000000000000  
0.0000000000000000 9.9562900000000010 0.0000000000000000  
0.0000000000000000 0.0000000000000000 23.1292800000000014

Ni Ag  
76 4

Selective dynamics

Direct

|                    |                     |                    |   |   |   |
|--------------------|---------------------|--------------------|---|---|---|
| 0.0000000000000000 | 0.0000000000000000  | 0.1392870000000030 | F | F | F |
| 0.1666669999999968 | 0.0833330000000032  | 0.0514190000000028 | F | F | F |
| 0.1650922227792192 | 0.0825760049209020  | 0.3147699435707177 | T | T | T |
| 0.0832437959578311 | 0.1664970997026590  | 0.2267777903613214 | T | T | T |
| 0.2500000000000000 | 0.0000000000000000  | 0.1392870000000030 | F | F | F |
| 0.2497603269090017 | -0.0005986858426110 | 0.3993619496145941 | T | T | T |
| 0.4166669999999968 | 0.0833330000000032  | 0.0514190000000028 | F | F | F |
| 0.4174560177280822 | 0.0825285719983808  | 0.3147520348792480 | T | T | T |
| 0.3333212362457676 | 0.1666935408446753  | 0.2268355772082212 | T | T | T |
| 0.5000000000000000 | 0.0000000000000000  | 0.1392870000000030 | F | F | F |
| 0.6666669999999968 | 0.0833330000000032  | 0.0514190000000028 | F | F | F |
| 0.6651286798952548 | 0.0825555196287609  | 0.3147353137801807 | T | T | T |
| 0.5832380070993007 | 0.1664905611956038  | 0.2267650388790088 | T | T | T |
| 0.7500000000000000 | 0.0000000000000000  | 0.1392870000000030 | F | F | F |
| 0.7497491102527343 | -0.0006141171003813 | 0.3993537108326319 | T | T | T |
| 0.9166669999999968 | 0.0833330000000032  | 0.0514190000000028 | F | F | F |
| 0.9174461637223585 | 0.0825538362776415  | 0.3147545564493196 | T | T | T |
| 0.8333166218485946 | 0.1666833781514055  | 0.2268443390574786 | T | T | T |
| 0.0000000000000000 | 0.2500000000000000  | 0.1392870000000030 | F | F | F |
| 0.0006141171003814 | 0.2502508897472654  | 0.3993537108326319 | T | T | T |
| 0.1666669999999968 | 0.3333330000000032  | 0.0514190000000028 | F | F | F |
| 0.1667143957442338 | 0.3333732612326774  | 0.3135571173651894 | T | T | T |
| 0.0832472920317885 | 0.4167791552606687  | 0.2267703182395885 | T | T | T |
| 0.2500000000000000 | 0.2500000000000000  | 0.1392870000000030 | F | F | F |
| 0.2497403198721528 | 0.2502899787952634  | 0.3993733274332004 | T | T | T |
| 0.4166669999999968 | 0.3333330000000032  | 0.0514190000000028 | F | F | F |
| 0.4174696522612102 | 0.3348961742816840  | 0.3147685897883851 | T | T | T |
| 0.3335285410526291 | 0.4167567850851464  | 0.2267772130957182 | T | T | T |
| 0.5000000000000000 | 0.2500000000000000  | 0.1392870000000030 | F | F | F |
| 0.5006424690646938 | 0.2502639640652231  | 0.3993647421513298 | T | T | T |
| 0.6666669999999968 | 0.3333330000000032  | 0.0514190000000028 | F | F | F |
| 0.6666427214102467 | 0.3333572785897529  | 0.3135561587387411 | T | T | T |
| 0.5832608778975958 | 0.4167391221024042  | 0.2267648828647943 | T | T | T |
| 0.7500000000000000 | 0.2500000000000000  | 0.1392870000000030 | F | F | F |
| 0.7497864094368624 | 0.2502135905631375  | 0.3993497451074032 | T | T | T |
| 0.9166669999999968 | 0.3333330000000032  | 0.0514190000000028 | F | F | F |
| 0.9174444803712390 | 0.3348713201047452  | 0.3147353137801807 | T | T | T |
| 0.8335094388043961 | 0.4167619929006994  | 0.2267650388790088 | T | T | T |
| 0.0000000000000000 | 0.5000000000000000  | 0.1392870000000030 | F | F | F |
| 0.1666669999999968 | 0.5833330000000032  | 0.0514190000000028 | F | F | F |
| 0.1651171888901330 | 0.5825804761897848  | 0.3147228747272332 | T | T | T |
| 0.0832505285951465 | 0.6665344483374753  | 0.2267639418506989 | T | T | T |
| 0.2500000000000000 | 0.5000000000000000  | 0.1392870000000030 | F | F | F |
| 0.2497505742079135 | 0.4994324380808648  | 0.3993546636889791 | T | T | T |

|                    |                    |                     |                     |   |   |   |
|--------------------|--------------------|---------------------|---------------------|---|---|---|
|                    | 0.416666999999968  | 0.583333000000032   | 0.051419000000028   | F | F | F |
|                    | 0.4174364505657352 | 0.5825635494342646  | 0.3147368497994212  | T | T | T |
|                    | 0.3333314292634470 | 0.6666685707365529  | 0.2268443610399225  | T | T | T |
|                    | 0.5000000000000000 | 0.5000000000000000  | 0.1392870000000030  | F | F | F |
|                    | 0.666666999999968  | 0.583333000000032   | 0.051419000000028   | F | F | F |
|                    | 0.6651038257183157 | 0.5825303477387899  | 0.3147685897883851  | T | T | T |
|                    | 0.5832432149148534 | 0.6664714589473710  | 0.2267772130957182  | T | T | T |
|                    | 0.7500000000000000 | 0.5000000000000000  | 0.1392870000000030  | F | F | F |
|                    | 0.7497360359347767 | 0.4993575309353063  | 0.3993647421513298  | T | T | T |
|                    | 0.916666999999968  | 0.583333000000032   | 0.051419000000028   | F | F | F |
|                    | 0.9174714280016191 | 0.5825439822719175  | 0.3147520348792480  | T | T | T |
|                    | 0.8333054591553275 | 0.6666787637542325  | 0.2268355772082212  | T | T | T |
|                    | 0.0000000000000000 | 0.7500000000000000  | 0.1392870000000030  | F | F | F |
|                    | 0.0005986858426110 | 0.7502396730909979  | 0.3993619496145941  | T | T | T |
|                    | 0.166666999999968  | 0.833333000000032   | 0.051419000000028   | F | F | F |
|                    | 0.1666533553949935 | 0.8333466446050064  | 0.3135545337090472  | T | T | T |
|                    | 0.0832288798040106 | 0.9167711201959894  | 0.2267657002997380  | T | T | T |
|                    | 0.2500000000000000 | 0.7500000000000000  | 0.1392870000000030  | F | F | F |
|                    | 0.2497598421710367 | 0.7502401578289636  | 0.3993429406856035  | T | T | T |
|                    | 0.416666999999968  | 0.833333000000032   | 0.051419000000028   | F | F | F |
|                    | 0.4174195238102152 | 0.8348828111098673  | 0.3147228747272332  | T | T | T |
|                    | 0.3334655516625246 | 0.9167494714048532  | 0.2267639418506989  | T | T | T |
|                    | 0.5000000000000000 | 0.7500000000000000  | 0.1392870000000030  | F | F | F |
|                    | 0.5005675619191352 | 0.7502494257920865  | 0.3993546636889791  | T | T | T |
|                    | 0.666666999999968  | 0.833333000000032   | 0.051419000000028   | F | F | F |
|                    | 0.6666267387673228 | 0.8332856042557661  | 0.3135571173651894  | T | T | T |
|                    | 0.5832208447393312 | 0.9167527079682117  | 0.2267703182395885  | T | T | T |
|                    | 0.7500000000000000 | 0.7500000000000000  | 0.1392870000000030  | F | F | F |
|                    | 0.7497100212047365 | 0.7502596801278471  | 0.3993733274332004  | T | T | T |
|                    | 0.916666999999968  | 0.833333000000032   | 0.051419000000028   | F | F | F |
|                    | 0.9174239950790981 | 0.8349077772207812  | 0.3147699435707177  | T | T | T |
|                    | 0.8335029002973410 | 0.9167562040421690  | 0.2267777903613214  | T | T | T |
|                    | 0.5000453731847712 | -0.0000403371694351 | 0.4277136880505878  | T | T | T |
|                    | 0.0000403371694351 | 0.4999546268152286  | 0.4277136880505878  | T | T | T |
|                    | 0.0000450175655325 | -0.0000450175655326 | 0.4277212682169123  | T | T | T |
|                    | 0.5000336001767616 | 0.4999663998232382  | 0.4277136557002825  | T | T | T |
| <b>4Au/Ni(111)</b> | 1.0000000000000000 |                     |                     |   |   |   |
|                    | 8.6224000674449712 | -4.9781450000000014 | 0.0000000000000000  |   |   |   |
|                    | 0.0000000000000000 | 9.9562900000000010  | 0.0000000000000000  |   |   |   |
|                    | 0.0000000000000000 | 0.0000000000000000  | 23.1292800000000014 |   |   |   |
|                    | Ni                 | Au                  |                     |   |   |   |
|                    | 76                 | 4                   |                     |   |   |   |
|                    | Selective dynamics |                     |                     |   |   |   |
|                    | Direct             |                     |                     |   |   |   |
|                    | 0.0000000000000000 | 0.0000000000000000  | 0.1392870000000030  | F | F | F |
|                    | 0.166666999999968  | 0.083333000000032   | 0.051419000000028   | F | F | F |
|                    | 0.1666455302710704 | 0.0833261110978930  | 0.3144408154246774  | T | T | T |
|                    | 0.0833269340481183 | 0.1666526704588396  | 0.2268270308016792  | T | T | T |
|                    | 0.2500000000000000 | 0.0000000000000000  | 0.1392870000000030  | F | F | F |
|                    | 0.2498082535405067 | -0.0003969336593036 | 0.4012140994015393  | T | T | T |
|                    | 0.416666999999968  | 0.083333000000032   | 0.051419000000028   | F | F | F |

|                    |                     |                    |   |   |   |
|--------------------|---------------------|--------------------|---|---|---|
| 0.4166968113921796 | 0.0832977249087248  | 0.3144493590930128 | T | T | T |
| 0.3333118940206261 | 0.1666821199447598  | 0.2266968242437568 | T | T | T |
| 0.5000000000000000 | 0.0000000000000000  | 0.1392870000000030 | F | F | F |
| 0.6666699999999968 | 0.0833330000000032  | 0.0514190000000028 | F | F | F |
| 0.6666963748724070 | 0.0833090534619552  | 0.3144183360551845 | T | T | T |
| 0.5833172854852872 | 0.1666274857359856  | 0.2268378455060945 | T | T | T |
| 0.7500000000000000 | 0.0000000000000000  | 0.1392870000000030 | F | F | F |
| 0.7498490901837558 | -0.0003370718837224 | 0.4011986638927426 | T | T | T |
| 0.9166669999999968 | 0.0833330000000032  | 0.0514190000000028 | F | F | F |
| 0.9166788295748498 | 0.0833211704251503  | 0.3144399129440562 | T | T | T |
| 0.8333377699188055 | 0.1666622300811946  | 0.2266967637381134 | T | T | T |
| 0.0000000000000000 | 0.2500000000000000  | 0.1392870000000030 | F | F | F |
| 0.0003370718837224 | 0.2501509098162444  | 0.4011986638927426 | T | T | T |
| 0.1666669999999968 | 0.3333330000000032  | 0.0514190000000028 | F | F | F |
| 0.1666875245398455 | 0.3333768234643084  | 0.3137326379683569 | T | T | T |
| 0.0833331197320243 | 0.4167151243230083  | 0.2268182793605054 | T | T | T |
| 0.2500000000000000 | 0.2500000000000000  | 0.1392870000000030 | F | F | F |
| 0.2497948274387110 | 0.2502055934500504  | 0.4012193188902752 | T | T | T |
| 0.4166669999999968 | 0.3333330000000032  | 0.0514190000000028 | F | F | F |
| 0.4167018040519916 | 0.3333731002988706  | 0.3144358641897457 | T | T | T |
| 0.3333774400611513 | 0.4166688583926453  | 0.2268251119202899 | T | T | T |
| 0.5000000000000000 | 0.2500000000000000  | 0.1392870000000030 | F | F | F |
| 0.5003710233219385 | 0.2501732620993483  | 0.4012021298101659 | T | T | T |
| 0.6666669999999968 | 0.3333330000000032  | 0.0514190000000028 | F | F | F |
| 0.6666881921731346 | 0.3333118078268652  | 0.3137759745995639 | T | T | T |
| 0.5833368758644747 | 0.4166631241355251  | 0.2268501702162302 | T | T | T |
| 0.7500000000000000 | 0.2500000000000000  | 0.1392870000000030 | F | F | F |
| 0.7498779475663052 | 0.2501220524336947  | 0.4012022089095542 | T | T | T |
| 0.9166669999999968 | 0.3333330000000032  | 0.0514190000000028 | F | F | F |
| 0.9166909465380448 | 0.3333036251275932  | 0.3144183360551845 | T | T | T |
| 0.8333725142640143 | 0.4166827145147129  | 0.2268378455060945 | T | T | T |
| 0.0000000000000000 | 0.5000000000000000  | 0.1392870000000030 | F | F | F |
| 0.1666669999999968 | 0.5833330000000032  | 0.0514190000000028 | F | F | F |
| 0.1666772796539853 | 0.5833286178593936  | 0.3144216303755809 | T | T | T |
| 0.0833154166009778 | 0.6666602628601194  | 0.2268457502846213 | T | T | T |
| 0.2500000000000000 | 0.5000000000000000  | 0.1392870000000030 | F | F | F |
| 0.2498535484703928 | 0.4996692187170196  | 0.4012123144616448 | T | T | T |
| 0.4166669999999968 | 0.5833330000000032  | 0.0514190000000028 | F | F | F |
| 0.4166751758087243 | 0.5833248241912757  | 0.3144306164756205 | T | T | T |
| 0.3333646370219243 | 0.6666353629780757  | 0.2266886029647836 | T | T | T |
| 0.5000000000000000 | 0.5000000000000000  | 0.1392870000000030 | F | F | F |
| 0.6666669999999968 | 0.5833330000000032  | 0.0514190000000028 | F | F | F |
| 0.6666268997011295 | 0.5832981959480082  | 0.3144358641897457 | T | T | T |
| 0.5833311416073548 | 0.6666225599388484  | 0.2268251119202899 | T | T | T |
| 0.7500000000000000 | 0.5000000000000000  | 0.1392870000000030 | F | F | F |
| 0.7498267379006517 | 0.4996289766780615  | 0.4012021298101659 | T | T | T |
| 0.9166669999999968 | 0.5833330000000032  | 0.0514190000000028 | F | F | F |
| 0.9167022750912753 | 0.5833031886078203  | 0.3144493590930128 | T | T | T |
| 0.8333168800552430 | 0.6666881059793737  | 0.2266968242437568 | T | T | T |
| 0.0000000000000000 | 0.7500000000000000  | 0.1392870000000030 | F | F | F |
| 0.0003969336593034 | 0.7501917464594934  | 0.4012140994015393 | T | T | T |



|                    |                     |                     |                     |   |   |   |
|--------------------|---------------------|---------------------|---------------------|---|---|---|
|                    | 0.166666999999968   | 0.833333000000032   | 0.051419000000028   | F | F | F |
|                    | 0.1666818069775100  | 0.8333181930224900  | 0.3137739706152233  | T | T | T |
|                    | 0.0833210420681603  | 0.9166789579318395  | 0.2268403416331341  | T | T | T |
|                    | 0.2500000000000000  | 0.7500000000000000  | 0.1392870000000030  | F | F | F |
|                    | 0.2498817283166208  | 0.7501182716833790  | 0.4011930927548349  | T | T | T |
|                    | 0.416666999999968   | 0.833333000000032   | 0.051419000000028   | F | F | F |
|                    | 0.4166713821406067  | 0.8333227203460148  | 0.3144216303755809  | T | T | T |
|                    | 0.3333397371398805  | 0.9166845833990223  | 0.2268457502846213  | T | T | T |
|                    | 0.5000000000000000  | 0.7500000000000000  | 0.1392870000000030  | F | F | F |
|                    | 0.5003307812829808  | 0.7501464515296075  | 0.4012123144616448  | T | T | T |
|                    | 0.666666999999968   | 0.833333000000032   | 0.051419000000028   | F | F | F |
|                    | 0.6666231765356917  | 0.8333124754601543  | 0.3137326379683569  | T | T | T |
|                    | 0.5832848756769914  | 0.9166668802679758  | 0.2268182793605054  | T | T | T |
|                    | 0.7500000000000000  | 0.7500000000000000  | 0.1392870000000030  | F | F | F |
|                    | 0.7497944065499496  | 0.7502051725612888  | 0.4012193188902752  | T | T | T |
|                    | 0.916666999999968   | 0.833333000000032   | 0.051419000000028   | F | F | F |
|                    | 0.9166738889021071  | 0.8333544697289296  | 0.3144408154246774  | T | T | T |
|                    | 0.8333473295411604  | 0.9166730659518819  | 0.2268270308016792  | T | T | T |
|                    | 0.5000358777631149  | -0.0000342705224806 | 0.4187107615890787  | T | T | T |
|                    | 0.0000342705224805  | 0.4999641222368851  | 0.4187107615890787  | T | T | T |
|                    | 0.0000216202431733  | -0.0000216202431733 | 0.4186926925151964  | T | T | T |
|                    | 0.5000305990420963  | 0.4999694009579037  | 0.4187015132901665  | T | T | T |
| <b>4Ni/Cu(111)</b> | 1.000000000000000   |                     |                     |   |   |   |
|                    | 8.8905944857135406  | -5.1329871195825199 | -0.0000000000000010 |   |   |   |
|                    | 0.0000000000000000  | 10.2659742391650006 | 0.0000000000000010  |   |   |   |
|                    | 0.0000000000000000  | 0.0000000000000000  | 23.3821328661704015 |   |   |   |
|                    | Ni                  | Cu                  |                     |   |   |   |
|                    | 4                   | 76                  |                     |   |   |   |
|                    | Selective dynamics  |                     |                     |   |   |   |
|                    | Direct              |                     |                     |   |   |   |
|                    | 0.2500000000000000  | 0.2500000000000000  | 0.3794282380951148  | T | T | T |
|                    | 0.7500000000000000  | 0.2500000000000000  | 0.3794282380951148  | T | T | T |
|                    | 0.2500000000000000  | 0.7500000000000000  | 0.3794282380951148  | T | T | T |
|                    | 0.7500000000000000  | 0.7500000000000000  | 0.3794282380951148  | T | T | T |
|                    | 0.0000000000000000  | 0.0000000000000000  | 0.1155258754999977  | F | F | F |
|                    | 0.0000337838244931  | 0.9999662161755067  | 0.3831201201280184  | T | T | T |
|                    | 0.1666666667000030  | 0.0833333332999970  | 0.0259047434999999  | F | F | F |
|                    | 0.1667563000874544  | 0.0835126000748928  | 0.2942108532406455  | T | T | T |
|                    | 0.0831361327000785  | 0.1665680664000437  | 0.2047965466772881  | T | T | T |
|                    | 0.2500000000000000  | 0.0000000000000000  | 0.1155258754999977  | F | F | F |
|                    | 0.2499324323510068  | 0.9999662161755067  | 0.3831201201280184  | T | T | T |
|                    | 0.4166666667000030  | 0.0833333332999970  | 0.0259047434999999  | F | F | F |
|                    | 0.4166666667000030  | 0.0833333332999970  | 0.2942371358926947  | T | T | T |
|                    | 0.33334319335999564 | 0.1665680664000437  | 0.2047965466772881  | T | T | T |
|                    | 0.5000000000000000  | 0.0000000000000000  | 0.1155258754999977  | F | F | F |
|                    | 0.5000337838244933  | 0.9999662161755067  | 0.3831201201280184  | T | T | T |
|                    | 0.6666666667000030  | 0.0833333332999970  | 0.0259047434999999  | F | F | F |
|                    | 0.6667563000874542  | 0.0835126000748928  | 0.2942108532406455  | T | T | T |
|                    | 0.5831361327000784  | 0.1665680664000437  | 0.2047965466772881  | T | T | T |
|                    | 0.7500000000000000  | 0.0000000000000000  | 0.1155258754999977  | F | F | F |
|                    | 0.7499324323510068  | 0.9999662161755067  | 0.3831201201280184  | T | T | T |

|                    |                    |                    |   |   |   |
|--------------------|--------------------|--------------------|---|---|---|
| 0.9166666667000030 | 0.0833333332999970 | 0.0259047434999999 | F | F | F |
| 0.9166666667000030 | 0.0833333332999970 | 0.2942371358926947 | T | T | T |
| 0.8334319335999563 | 0.1665680664000437 | 0.2047965466772881 | T | T | T |
| 0.0000000000000000 | 0.2500000000000000 | 0.1155258754999977 | F | F | F |
| 0.0000337838244931 | 0.2500675676489932 | 0.3831201201280184 | T | T | T |
| 0.1666666667000030 | 0.3333333332999970 | 0.0259047434999999 | F | F | F |
| 0.1667563000874544 | 0.3332436999125455 | 0.2942108532406455 | T | T | T |
| 0.0833333332999970 | 0.4166666667000030 | 0.2051388865688787 | T | T | T |
| 0.2500000000000000 | 0.2500000000000000 | 0.1155258754999977 | F | F | F |
| 0.4166666667000030 | 0.3333333332999970 | 0.0259047434999999 | F | F | F |
| 0.4164873999251072 | 0.3332436999125455 | 0.2942108532406455 | T | T | T |
| 0.3334319335999564 | 0.4168638672999215 | 0.2047965466772881 | T | T | T |
| 0.5000000000000000 | 0.2500000000000000 | 0.1155258754999977 | F | F | F |
| 0.5000337838244933 | 0.2500675676489932 | 0.3831201201280184 | T | T | T |
| 0.6666666667000030 | 0.3333333332999970 | 0.0259047434999999 | F | F | F |
| 0.6667563000874542 | 0.3332436999125455 | 0.2942108532406455 | T | T | T |
| 0.5833333332999970 | 0.4166666667000030 | 0.2051388865688787 | T | T | T |
| 0.7500000000000000 | 0.2500000000000000 | 0.1155258754999977 | F | F | F |
| 0.9166666667000030 | 0.3333333332999970 | 0.0259047434999999 | F | F | F |
| 0.9164873999251070 | 0.3332436999125455 | 0.2942108532406455 | T | T | T |
| 0.8334319335999563 | 0.4168638672999215 | 0.2047965466772881 | T | T | T |
| 0.0000000000000000 | 0.5000000000000000 | 0.1155258754999977 | F | F | F |
| 0.0000337838244931 | 0.4999662161755070 | 0.3831201201280184 | T | T | T |
| 0.1666666667000030 | 0.5833333332999970 | 0.0259047434999999 | F | F | F |
| 0.1667563000874544 | 0.5835126000748930 | 0.2942108532406455 | T | T | T |
| 0.0831361327000785 | 0.6665680664000437 | 0.2047965466772881 | T | T | T |
| 0.2500000000000000 | 0.5000000000000000 | 0.1155258754999977 | F | F | F |
| 0.2499324323510068 | 0.4999662161755070 | 0.3831201201280184 | T | T | T |
| 0.4166666667000030 | 0.5833333332999970 | 0.0259047434999999 | F | F | F |
| 0.4166666667000030 | 0.5833333332999970 | 0.2942371358926947 | T | T | T |
| 0.3334319335999564 | 0.6665680664000437 | 0.2047965466772881 | T | T | T |
| 0.5000000000000000 | 0.5000000000000000 | 0.1155258754999977 | F | F | F |
| 0.5000337838244933 | 0.4999662161755070 | 0.3831201201280184 | T | T | T |
| 0.6666666667000030 | 0.5833333332999970 | 0.0259047434999999 | F | F | F |
| 0.6667563000874542 | 0.5835126000748930 | 0.2942108532406455 | T | T | T |
| 0.5831361327000784 | 0.6665680664000437 | 0.2047965466772881 | T | T | T |
| 0.7500000000000000 | 0.5000000000000000 | 0.1155258754999977 | F | F | F |
| 0.7499324323510068 | 0.4999662161755070 | 0.3831201201280184 | T | T | T |
| 0.9166666667000030 | 0.5833333332999970 | 0.0259047434999999 | F | F | F |
| 0.9166666667000030 | 0.5833333332999970 | 0.2942371358926947 | T | T | T |
| 0.8334319335999563 | 0.6665680664000437 | 0.2047965466772881 | T | T | T |
| 0.0000000000000000 | 0.7500000000000000 | 0.1155258754999977 | F | F | F |
| 0.0000337838244931 | 0.7500675676489932 | 0.3831201201280184 | T | T | T |
| 0.1666666667000030 | 0.8333333332999970 | 0.0259047434999999 | F | F | F |
| 0.1667563000874544 | 0.8332436999125458 | 0.2942108532406455 | T | T | T |
| 0.0833333332999970 | 0.9166666667000030 | 0.2051388865688787 | T | T | T |
| 0.2500000000000000 | 0.7500000000000000 | 0.1155258754999977 | F | F | F |
| 0.4166666667000030 | 0.8333333332999970 | 0.0259047434999999 | F | F | F |
| 0.4164873999251072 | 0.8332436999125458 | 0.2942108532406455 | T | T | T |
| 0.3334319335999564 | 0.9168638672999216 | 0.2047965466772881 | T | T | T |
| 0.5000000000000000 | 0.7500000000000000 | 0.1155258754999977 | F | F | F |

|                    |                    |                     |                     |   |   |   |
|--------------------|--------------------|---------------------|---------------------|---|---|---|
|                    | 0.5000337838244933 | 0.7500675676489932  | 0.3831201201280184  | T | T | T |
|                    | 0.666666667000030  | 0.833333332999970   | 0.0259047434999999  | F | F | F |
|                    | 0.6667563000874542 | 0.8332436999125458  | 0.2942108532406455  | T | T | T |
|                    | 0.583333332999970  | 0.916666667000030   | 0.2051388865688787  | T | T | T |
|                    | 0.7500000000000000 | 0.7500000000000000  | 0.1155258754999977  | F | F | F |
|                    | 0.916666667000030  | 0.833333332999970   | 0.0259047434999999  | F | F | F |
|                    | 0.9164873999251070 | 0.8332436999125458  | 0.2942108532406455  | T | T | T |
|                    | 0.8334319335999563 | 0.9168638672999216  | 0.2047965466772881  | T | T | T |
| <b>4Pd/Cu(111)</b> | 1.0000000000000000 |                     |                     |   |   |   |
|                    | 8.8905944857135406 | -5.1329871195825199 | -0.0000000000000010 |   |   |   |
|                    | 0.0000000000000000 | 10.2659742391650006 | 0.0000000000000010  |   |   |   |
|                    | 0.0000000000000000 | 0.0000000000000000  | 23.3821328661704015 |   |   |   |
|                    | Pd                 | Cu                  |                     |   |   |   |
|                    | 4                  | 76                  |                     |   |   |   |
|                    | Selective dynamics |                     |                     |   |   |   |
|                    | Direct             |                     |                     |   |   |   |
|                    | 0.2500000000000000 | 0.2500000000000000  | 0.3863801337777262  | T | T | T |
|                    | 0.7500000000000000 | 0.2500000000000000  | 0.3863801337777262  | T | T | T |
|                    | 0.2500000000000000 | 0.7500000000000000  | 0.3863801337777262  | T | T | T |
|                    | 0.7500000000000000 | 0.7500000000000000  | 0.3863801337777262  | T | T | T |
|                    | 0.0000000000000000 | 0.0000000000000000  | 0.1155258754999977  | F | F | F |
|                    | 0.0000831240897351 | 0.9999168759102650  | 0.3841130202925175  | T | T | T |
|                    | 0.166666667000030  | 0.083333332999970   | 0.0259047434999999  | F | F | F |
|                    | 0.1664386653971338 | 0.0828773306942587  | 0.2940153782514090  | T | T | T |
|                    | 0.0830101168102454 | 0.1665050584551271  | 0.2048560836128362  | T | T | T |
|                    | 0.2500000000000000 | 0.0000000000000000  | 0.1155258754999977  | F | F | F |
|                    | 0.2498337518205298 | 0.9999168759102650  | 0.3841130202925175  | T | T | T |
|                    | 0.416666667000030  | 0.083333332999970   | 0.0259047434999999  | F | F | F |
|                    | 0.416666667000030  | 0.083333332999970   | 0.2946628260939351  | T | T | T |
|                    | 0.3334949415448728 | 0.1665050584551271  | 0.2048560836128362  | T | T | T |
|                    | 0.5000000000000000 | 0.0000000000000000  | 0.1155258754999977  | F | F | F |
|                    | 0.5000831240897350 | 0.9999168759102650  | 0.3841130202925175  | T | T | T |
|                    | 0.666666667000030  | 0.083333332999970   | 0.0259047434999999  | F | F | F |
|                    | 0.6664386653971338 | 0.0828773306942587  | 0.2940153782514090  | T | T | T |
|                    | 0.5830101168102455 | 0.1665050584551271  | 0.2048560836128362  | T | T | T |
|                    | 0.7500000000000000 | 0.0000000000000000  | 0.1155258754999977  | F | F | F |
|                    | 0.7498337518205297 | 0.9999168759102650  | 0.3841130202925175  | T | T | T |
|                    | 0.916666667000030  | 0.083333332999970   | 0.0259047434999999  | F | F | F |
|                    | 0.916666667000030  | 0.083333332999970   | 0.2946628260939351  | T | T | T |
|                    | 0.8334949415448729 | 0.1665050584551271  | 0.2048560836128362  | T | T | T |
|                    | 0.0000000000000000 | 0.2500000000000000  | 0.1155258754999977  | F | F | F |
|                    | 0.0000831240897351 | 0.2501662481794703  | 0.3841130202925175  | T | T | T |
|                    | 0.166666667000030  | 0.333333332999970   | 0.0259047434999999  | F | F | F |
|                    | 0.1664386653971338 | 0.3335613346028662  | 0.2940153782514090  | T | T | T |
|                    | 0.083333332999970  | 0.416666667000030   | 0.2051324365609134  | T | T | T |
|                    | 0.2500000000000000 | 0.2500000000000000  | 0.1155258754999977  | F | F | F |
|                    | 0.416666667000030  | 0.333333332999970   | 0.0259047434999999  | F | F | F |
|                    | 0.4171226693057413 | 0.3335613346028662  | 0.2940153782514090  | T | T | T |
|                    | 0.3334949415448728 | 0.4169898831897476  | 0.2048560836128362  | T | T | T |
|                    | 0.5000000000000000 | 0.2500000000000000  | 0.1155258754999977  | F | F | F |
|                    | 0.5000831240897350 | 0.2501662481794703  | 0.3841130202925175  | T | T | T |

|                    |                    |                     |                     |   |   |   |
|--------------------|--------------------|---------------------|---------------------|---|---|---|
|                    | 0.666666667000030  | 0.333333332999970   | 0.0259047434999999  | F | F | F |
|                    | 0.6664386653971338 | 0.3335613346028662  | 0.2940153782514090  | T | T | T |
|                    | 0.583333332999970  | 0.4166666667000030  | 0.2051324365609134  | T | T | T |
|                    | 0.7500000000000000 | 0.2500000000000000  | 0.1155258754999977  | F | F | F |
|                    | 0.9166666667000030 | 0.333333332999970   | 0.0259047434999999  | F | F | F |
|                    | 0.9171226693057414 | 0.3335613346028662  | 0.2940153782514090  | T | T | T |
|                    | 0.8334949415448729 | 0.4169898831897476  | 0.2048560836128362  | T | T | T |
|                    | 0.0000000000000000 | 0.5000000000000000  | 0.1155258754999977  | F | F | F |
|                    | 0.0000831240897351 | 0.4999168759102648  | 0.3841130202925175  | T | T | T |
|                    | 0.1666666667000030 | 0.583333332999970   | 0.0259047434999999  | F | F | F |
|                    | 0.1664386653971338 | 0.5828773306942586  | 0.2940153782514090  | T | T | T |
|                    | 0.0830101168102454 | 0.6665050584551271  | 0.2048560836128362  | T | T | T |
|                    | 0.2500000000000000 | 0.5000000000000000  | 0.1155258754999977  | F | F | F |
|                    | 0.2498337518205298 | 0.4999168759102648  | 0.3841130202925175  | T | T | T |
|                    | 0.4166666667000030 | 0.583333332999970   | 0.0259047434999999  | F | F | F |
|                    | 0.4166666667000030 | 0.583333332999970   | 0.2946628260939351  | T | T | T |
|                    | 0.3334949415448728 | 0.6665050584551271  | 0.2048560836128362  | T | T | T |
|                    | 0.5000000000000000 | 0.5000000000000000  | 0.1155258754999977  | F | F | F |
|                    | 0.5000831240897350 | 0.4999168759102648  | 0.3841130202925175  | T | T | T |
|                    | 0.6666666667000030 | 0.583333332999970   | 0.0259047434999999  | F | F | F |
|                    | 0.6664386653971338 | 0.5828773306942586  | 0.2940153782514090  | T | T | T |
|                    | 0.5830101168102455 | 0.6665050584551271  | 0.2048560836128362  | T | T | T |
|                    | 0.7500000000000000 | 0.5000000000000000  | 0.1155258754999977  | F | F | F |
|                    | 0.7498337518205297 | 0.4999168759102648  | 0.3841130202925175  | T | T | T |
|                    | 0.9166666667000030 | 0.583333332999970   | 0.0259047434999999  | F | F | F |
|                    | 0.9166666667000030 | 0.583333332999970   | 0.2946628260939351  | T | T | T |
|                    | 0.8334949415448729 | 0.6665050584551271  | 0.2048560836128362  | T | T | T |
|                    | 0.0000000000000000 | 0.7500000000000000  | 0.1155258754999977  | F | F | F |
|                    | 0.0000831240897351 | 0.7501662481794703  | 0.3841130202925175  | T | T | T |
|                    | 0.1666666667000030 | 0.833333332999970   | 0.0259047434999999  | F | F | F |
|                    | 0.1664386653971338 | 0.8335613346028662  | 0.2940153782514090  | T | T | T |
|                    | 0.083333332999970  | 0.9166666667000030  | 0.2051324365609134  | T | T | T |
|                    | 0.2500000000000000 | 0.7500000000000000  | 0.1155258754999977  | F | F | F |
|                    | 0.4166666667000030 | 0.833333332999970   | 0.0259047434999999  | F | F | F |
|                    | 0.4171226693057413 | 0.8335613346028662  | 0.2940153782514090  | T | T | T |
|                    | 0.3334949415448728 | 0.9169898831897545  | 0.2048560836128362  | T | T | T |
|                    | 0.5000000000000000 | 0.7500000000000000  | 0.1155258754999977  | F | F | F |
|                    | 0.5000831240897350 | 0.7501662481794703  | 0.3841130202925175  | T | T | T |
|                    | 0.6666666667000030 | 0.833333332999970   | 0.0259047434999999  | F | F | F |
|                    | 0.6664386653971338 | 0.8335613346028662  | 0.2940153782514090  | T | T | T |
|                    | 0.583333332999970  | 0.9166666667000030  | 0.2051324365609134  | T | T | T |
|                    | 0.7500000000000000 | 0.7500000000000000  | 0.1155258754999977  | F | F | F |
|                    | 0.9166666667000030 | 0.833333332999970   | 0.0259047434999999  | F | F | F |
|                    | 0.9171226693057414 | 0.8335613346028662  | 0.2940153782514090  | T | T | T |
|                    | 0.8334949415448729 | 0.9169898831897545  | 0.2048560836128362  | T | T | T |
| <b>4Pt/Cu(111)</b> | 1.0000000000000000 |                     |                     |   |   |   |
|                    | 8.8905944857135406 | -5.1329871195825199 | -0.0000000000000010 |   |   |   |
|                    | 0.0000000000000000 | 10.2659742391650006 | 0.0000000000000010  |   |   |   |
|                    | 0.0000000000000000 | 0.0000000000000000  | 23.3821328661704015 |   |   |   |
|                    | Pt                 | Cu                  |                     |   |   |   |
|                    | 4                  | 76                  |                     |   |   |   |

Selective dynamics

Direct

|                    |                    |                    |   |   |   |
|--------------------|--------------------|--------------------|---|---|---|
| 0.2500000000000000 | 0.2500000000000000 | 0.3838822250741245 | T | T | T |
| 0.7500000000000000 | 0.2500000000000000 | 0.3838822250741245 | T | T | T |
| 0.2500000000000000 | 0.7500000000000000 | 0.3838822250741245 | T | T | T |
| 0.7500000000000000 | 0.7500000000000000 | 0.3838822250741245 | T | T | T |
| 0.0000000000000000 | 0.0000000000000000 | 0.1155258754999977 | F | F | F |
| 0.0000380050948792 | 0.9999619949051208 | 0.3854381412099173 | T | T | T |
| 0.1666666667000030 | 0.083333332999970  | 0.0259047434999999 | F | F | F |
| 0.1659308222105480 | 0.0818616443210800 | 0.2935273412201198 | T | T | T |
| 0.0830457953074486 | 0.1665228977037287 | 0.2044338048420400 | T | T | T |
| 0.2500000000000000 | 0.0000000000000000 | 0.1155258754999977 | F | F | F |
| 0.2499239898102417 | 0.9999619949051208 | 0.3854381412099173 | T | T | T |
| 0.4166666667000030 | 0.083333332999970  | 0.0259047434999999 | F | F | F |
| 0.4166666667000030 | 0.083333332999970  | 0.2942497797655079 | T | T | T |
| 0.3334771022962713 | 0.1665228977037287 | 0.2044338048420400 | T | T | T |
| 0.5000000000000000 | 0.0000000000000000 | 0.1155258754999977 | F | F | F |
| 0.5000380050948792 | 0.9999619949051208 | 0.3854381412099173 | T | T | T |
| 0.6666666667000030 | 0.083333332999970  | 0.0259047434999999 | F | F | F |
| 0.6659308222105480 | 0.0818616443210800 | 0.2935273412201198 | T | T | T |
| 0.5830457953074486 | 0.1665228977037287 | 0.2044338048420400 | T | T | T |
| 0.7500000000000000 | 0.0000000000000000 | 0.1155258754999977 | F | F | F |
| 0.7499239898102417 | 0.9999619949051208 | 0.3854381412099173 | T | T | T |
| 0.9166666667000030 | 0.083333332999970  | 0.0259047434999999 | F | F | F |
| 0.9166666667000030 | 0.083333332999970  | 0.2942497797655079 | T | T | T |
| 0.8334771022962713 | 0.1665228977037287 | 0.2044338048420400 | T | T | T |
| 0.0000000000000000 | 0.2500000000000000 | 0.1155258754999977 | F | F | F |
| 0.0000380050948792 | 0.2500760101897583 | 0.3854381412099173 | T | T | T |
| 0.1666666667000030 | 0.333333332999970  | 0.0259047434999999 | F | F | F |
| 0.1659308222105480 | 0.3340691777894520 | 0.2935273412201198 | T | T | T |
| 0.083333332999970  | 0.4166666667000030 | 0.2047991552073682 | T | T | T |
| 0.2500000000000000 | 0.2500000000000000 | 0.1155258754999977 | F | F | F |
| 0.4166666667000030 | 0.333333332999970  | 0.0259047434999999 | F | F | F |
| 0.4181383556789200 | 0.3340691777894520 | 0.2935273412201198 | T | T | T |
| 0.3334771022962713 | 0.4169542046925514 | 0.2044338048420400 | T | T | T |
| 0.5000000000000000 | 0.2500000000000000 | 0.1155258754999977 | F | F | F |
| 0.5000380050948792 | 0.2500760101897583 | 0.3854381412099173 | T | T | T |
| 0.6666666667000030 | 0.333333332999970  | 0.0259047434999999 | F | F | F |
| 0.6659308222105480 | 0.3340691777894520 | 0.2935273412201198 | T | T | T |
| 0.583333332999970  | 0.4166666667000030 | 0.2047991552073682 | T | T | T |
| 0.7500000000000000 | 0.2500000000000000 | 0.1155258754999977 | F | F | F |
| 0.9166666667000030 | 0.333333332999970  | 0.0259047434999999 | F | F | F |
| 0.9181383556789200 | 0.3340691777894520 | 0.2935273412201198 | T | T | T |
| 0.8334771022962713 | 0.4169542046925514 | 0.2044338048420400 | T | T | T |
| 0.0000000000000000 | 0.5000000000000000 | 0.1155258754999977 | F | F | F |
| 0.0000380050948792 | 0.4999619949051208 | 0.3854381412099173 | T | T | T |
| 0.1666666667000030 | 0.583333332999970  | 0.0259047434999999 | F | F | F |
| 0.1659308222105480 | 0.5818616443210800 | 0.2935273412201198 | T | T | T |
| 0.0830457953074486 | 0.6665228977037287 | 0.2044338048420400 | T | T | T |
| 0.2500000000000000 | 0.5000000000000000 | 0.1155258754999977 | F | F | F |
| 0.2499239898102417 | 0.4999619949051208 | 0.3854381412099173 | T | T | T |

|                    |                    |                     |                     |   |   |   |
|--------------------|--------------------|---------------------|---------------------|---|---|---|
|                    | 0.416666667000030  | 0.5833333332999970  | 0.0259047434999999  | F | F | F |
|                    | 0.416666667000030  | 0.5833333332999970  | 0.2942497797655079  | T | T | T |
|                    | 0.3334771022962713 | 0.6665228977037287  | 0.2044338048420400  | T | T | T |
|                    | 0.5000000000000000 | 0.5000000000000000  | 0.1155258754999977  | F | F | F |
|                    | 0.5000380050948792 | 0.4999619949051208  | 0.3854381412099173  | T | T | T |
|                    | 0.666666667000030  | 0.5833333332999970  | 0.0259047434999999  | F | F | F |
|                    | 0.6659308222105480 | 0.5818616443210800  | 0.2935273412201198  | T | T | T |
|                    | 0.5830457953074486 | 0.6665228977037287  | 0.2044338048420400  | T | T | T |
|                    | 0.7500000000000000 | 0.5000000000000000  | 0.1155258754999977  | F | F | F |
|                    | 0.7499239898102417 | 0.4999619949051208  | 0.3854381412099173  | T | T | T |
|                    | 0.916666667000030  | 0.5833333332999970  | 0.0259047434999999  | F | F | F |
|                    | 0.916666667000030  | 0.5833333332999970  | 0.2942497797655079  | T | T | T |
|                    | 0.8334771022962713 | 0.6665228977037287  | 0.2044338048420400  | T | T | T |
|                    | 0.0000000000000000 | 0.7500000000000000  | 0.1155258754999977  | F | F | F |
|                    | 0.0000380050948792 | 0.7500760101897583  | 0.3854381412099173  | T | T | T |
|                    | 0.166666667000030  | 0.8333333332999970  | 0.0259047434999999  | F | F | F |
|                    | 0.1659308222105480 | 0.8340691777894520  | 0.2935273412201198  | T | T | T |
|                    | 0.0833333332999970 | 0.916666667000030   | 0.2047991552073682  | T | T | T |
|                    | 0.2500000000000000 | 0.7500000000000000  | 0.1155258754999977  | F | F | F |
|                    | 0.416666667000030  | 0.8333333332999970  | 0.0259047434999999  | F | F | F |
|                    | 0.4181383556789200 | 0.8340691777894520  | 0.2935273412201198  | T | T | T |
|                    | 0.3334771022962713 | 0.9169542046925514  | 0.2044338048420400  | T | T | T |
|                    | 0.5000000000000000 | 0.7500000000000000  | 0.1155258754999977  | F | F | F |
|                    | 0.5000380050948792 | 0.7500760101897583  | 0.3854381412099173  | T | T | T |
|                    | 0.666666667000030  | 0.8333333332999970  | 0.0259047434999999  | F | F | F |
|                    | 0.6659308222105480 | 0.8340691777894520  | 0.2935273412201198  | T | T | T |
|                    | 0.5833333332999970 | 0.916666667000030   | 0.2047991552073682  | T | T | T |
|                    | 0.7500000000000000 | 0.7500000000000000  | 0.1155258754999977  | F | F | F |
|                    | 0.916666667000030  | 0.8333333332999970  | 0.0259047434999999  | F | F | F |
|                    | 0.9181383556789200 | 0.8340691777894520  | 0.2935273412201198  | T | T | T |
|                    | 0.8334771022962713 | 0.9169542046925514  | 0.2044338048420400  | T | T | T |
| <b>(10) 4X-PC</b>  |                    |                     |                     |   |   |   |
| <b>4Cu/Ni(111)</b> | 1.0000000000000000 |                     |                     |   |   |   |
|                    | 8.6224000674449712 | -4.9781450000000014 | 0.0000000000000000  |   |   |   |
|                    | 0.0000000000000000 | 9.9562900000000010  | 0.0000000000000000  |   |   |   |
|                    | 0.0000000000000000 | 0.0000000000000000  | 23.1292800000000014 |   |   |   |
|                    | Ni                 | Cu                  |                     |   |   |   |
|                    | 76                 | 4                   |                     |   |   |   |
|                    | Selective dynamics |                     |                     |   |   |   |
|                    | Direct             |                     |                     |   |   |   |
|                    | 0.0000000000000000 | 0.0000000000000000  | 0.1392870000000030  | F | F | F |
|                    | 0.0017306852558434 | 0.0021052702482081  | 0.4008112824429304  | T | T | T |
|                    | 0.1666669999999968 | 0.0833330000000032  | 0.0514190000000028  | F | F | F |
|                    | 0.1669003503300956 | 0.0834114140107332  | 0.3140498335563038  | T | T | T |
|                    | 0.0832870811330011 | 0.1665283025836004  | 0.2266807875395074  | T | T | T |
|                    | 0.2500000000000000 | 0.0000000000000000  | 0.1392870000000030  | F | F | F |
|                    | 0.2495173531231529 | 0.9995331433159294  | 0.4009168128272833  | T | T | T |
|                    | 0.4166669999999968 | 0.0833330000000032  | 0.0514190000000028  | F | F | F |
|                    | 0.4160553476343551 | 0.0831816285186093  | 0.3141223721846274  | T | T | T |
|                    | 0.3332817399634536 | 0.1666604012196018  | 0.2266396517700997  | T | T | T |
|                    | 0.5000000000000000 | 0.0000000000000000  | 0.1392870000000030  | F | F | F |

|                     |                    |                    |   |   |   |
|---------------------|--------------------|--------------------|---|---|---|
| 0.5003840752138657  | 0.0023190348002160 | 0.4007934817552155 | T | T | T |
| 0.6666669999999968  | 0.0833330000000032 | 0.0514190000000028 | F | F | F |
| 0.6666942912644700  | 0.0830669625721328 | 0.3142588077459223 | T | T | T |
| 0.5832078453672978  | 0.1666204790326944 | 0.2267462642386064 | T | T | T |
| 0.7500000000000000  | 0.0000000000000000 | 0.1392870000000030 | F | F | F |
| 0.7526089366905211  | 0.0053877443355432 | 0.4008432583147368 | T | T | T |
| 0.9166669999999968  | 0.0833330000000032 | 0.0514190000000028 | F | F | F |
| 0.9167114952572675  | 0.0832732230376081 | 0.3141834914547132 | T | T | T |
| 0.8333087855171399  | 0.1665974329693114 | 0.2267056193927104 | T | T | T |
| 0.0000000000000000  | 0.2500000000000000 | 0.1392870000000030 | F | F | F |
| 0.9983008925797634  | 0.2487157562799283 | 0.4011072512920961 | T | T | T |
| 0.1666669999999968  | 0.3333330000000032 | 0.0514190000000028 | F | F | F |
| 0.1673271960257807  | 0.3338192426403737 | 0.3147574411698741 | T | T | T |
| 0.0836644066463919  | 0.4166625483069097 | 0.2269741412650532 | T | T | T |
| 0.2500000000000000  | 0.2500000000000000 | 0.1392870000000030 | F | F | F |
| 0.2481936736033248  | 0.2454572756587581 | 0.4009422741730120 | T | T | T |
| 0.4166669999999968  | 0.3333330000000032 | 0.0514190000000028 | F | F | F |
| 0.4166446865807245  | 0.3337460757784925 | 0.3146656452572785 | T | T | T |
| 0.3332111866099723  | 0.4167192311265211 | 0.2270339324588591 | T | T | T |
| 0.5000000000000000  | 0.2500000000000000 | 0.1392870000000030 | F | F | F |
| 0.5003575687550423  | 0.2478456985968407 | 0.4008757776558411 | T | T | T |
| 0.6666669999999968  | 0.3333330000000032 | 0.0514190000000028 | F | F | F |
| 0.6662400759923841  | 0.3335105650925456 | 0.3141273328193463 | T | T | T |
| 0.5831012646389766  | 0.4167347478845755 | 0.2268568251298220 | T | T | T |
| 0.7500000000000000  | 0.2500000000000000 | 0.1392870000000030 | F | F | F |
| 0.7500894549479185  | 0.2501156019230280 | 0.4011880323663490 | T | T | T |
| 0.9166669999999968  | 0.3333330000000032 | 0.0514190000000028 | F | F | F |
| 0.9169006868705196  | 0.3332366859023068 | 0.3144252322228525 | T | T | T |
| 0.83330802455160438 | 0.4165640501272776 | 0.2267605053165838 | T | T | T |
| 0.0000000000000000  | 0.5000000000000000 | 0.1392870000000030 | F | F | F |
| 0.9982784793229982  | 0.4996788987930643 | 0.4009662670567664 | T | T | T |
| 0.1666669999999968  | 0.5833330000000032 | 0.0514190000000028 | F | F | F |
| 0.1674830073277960  | 0.5834382433744807 | 0.3146148121246739 | T | T | T |
| 0.0831465821132440  | 0.6666362190818944 | 0.2266471727863575 | T | T | T |
| 0.2500000000000000  | 0.5000000000000000 | 0.1392870000000030 | F | F | F |
| 0.4166669999999968  | 0.5833330000000032 | 0.0514190000000028 | F | F | F |
| 0.4170152472694539  | 0.5835282581389905 | 0.3153197673330439 | T | T | T |
| 0.3333394280515876  | 0.6666432901196799 | 0.2270310232568917 | T | T | T |
| 0.5000000000000000  | 0.5000000000000000 | 0.1392870000000030 | F | F | F |
| 0.6666669999999968  | 0.5833330000000032 | 0.0514190000000028 | F | F | F |
| 0.6665596816900958  | 0.5836515816868300 | 0.3150233126190400 | T | T | T |
| 0.5836510252935767  | 0.6671485584925989 | 0.2272572963509489 | T | T | T |
| 0.7500000000000000  | 0.5000000000000000 | 0.1392870000000030 | F | F | F |
| 0.7523098650217719  | 0.4972414779799976 | 0.4007766574504856 | T | T | T |
| 0.9166669999999968  | 0.5833330000000032 | 0.0514190000000028 | F | F | F |
| 0.9166433311238293  | 0.5838563784656756 | 0.3141784198248700 | T | T | T |
| 0.8333587942010894  | 0.6667591129886361 | 0.2268302743218413 | T | T | T |
| 0.0000000000000000  | 0.7500000000000000 | 0.1392870000000030 | F | F | F |
| 0.0015529888236685  | 0.7494586405252193 | 0.4008137942971715 | T | T | T |
| 0.1666669999999968  | 0.8333330000000032 | 0.0514190000000028 | F | F | F |
| 0.1665701873597314  | 0.8332879872181351 | 0.3137419099998340 | T | T | T |

|                    |                    |                     |                     |   |   |   |
|--------------------|--------------------|---------------------|---------------------|---|---|---|
|                    | 0.0835891002822677 | 0.9167951769195142  | 0.2267019542282753  | T | T | T |
|                    | 0.2500000000000000 | 0.7500000000000000  | 0.1392870000000030  | F | F | F |
|                    | 0.2477486871786283 | 0.7525235429874684  | 0.4006941629798462  | T | T | T |
|                    | 0.4166669999999968 | 0.8333330000000032  | 0.0514190000000028  | F | F | F |
|                    | 0.4168430917593966 | 0.8327453448055735  | 0.3145600944902256  | T | T | T |
|                    | 0.3331291729693433 | 0.9165654893815898  | 0.2266675271364704  | T | T | T |
|                    | 0.5000000000000000 | 0.7500000000000000  | 0.1392870000000030  | F | F | F |
|                    | 0.6666669999999968 | 0.8333330000000032  | 0.0514190000000028  | F | F | F |
|                    | 0.6666247562259571 | 0.8332398258163067  | 0.3152067366561369  | T | T | T |
|                    | 0.5831974857477533 | 0.9163421488556907  | 0.2269241074350532  | T | T | T |
|                    | 0.7500000000000000 | 0.7500000000000000  | 0.1392870000000030  | F | F | F |
|                    | 0.9166669999999968 | 0.8333330000000032  | 0.0514190000000028  | F | F | F |
|                    | 0.9158727362562473 | 0.8329079980168146  | 0.3146015043714385  | T | T | T |
|                    | 0.8332694615948668 | 0.9164467280023061  | 0.2269138768686858  | T | T | T |
|                    | 0.5000394400052173 | 0.7526072473479815  | 0.4057438729106266  | T | T | T |
|                    | 0.7521503854452050 | 0.7510851528322391  | 0.4059281191259672  | T | T | T |
|                    | 0.2480759493698272 | 0.4990363504658930  | 0.4058221964609317  | T | T | T |
|                    | 0.5001251236223183 | 0.4975013509137938  | 0.4057231166001714  | T | T | T |
| <b>4Ag/Ni(111)</b> | 1.0000000000000000 |                     |                     |   |   |   |
|                    | 8.6224000674449712 | -4.9781450000000014 | 0.0000000000000000  |   |   |   |
|                    | 0.0000000000000000 | 9.9562900000000010  | 0.0000000000000000  |   |   |   |
|                    | 0.0000000000000000 | 0.0000000000000000  | 23.1292800000000014 |   |   |   |
|                    | Ni                 | Ag                  |                     |   |   |   |
|                    | 76                 | 4                   |                     |   |   |   |
|                    | Selective dynamics |                     |                     |   |   |   |
|                    | Direct             |                     |                     |   |   |   |
|                    | 0.0000000000000000 | 0.0000000000000000  | 0.1392870000000030  | F | F | F |
|                    | 0.0075171386575548 | 0.0079880073303329  | 0.3988174234101933  | T | T | T |
|                    | 0.1666669999999968 | 0.0833330000000032  | 0.0514190000000028  | F | F | F |
|                    | 0.1675798463209404 | 0.0840039167218904  | 0.3122116619223263  | T | T | T |
|                    | 0.0837384685367866 | 0.1676738450104054  | 0.2263161356034260  | T | T | T |
|                    | 0.2500000000000000 | 0.0000000000000000  | 0.1392870000000030  | F | F | F |
|                    | 0.2496192370473551 | 0.9994759481144371  | 0.3989978741689910  | T | T | T |
|                    | 0.4166669999999968 | 0.0833330000000032  | 0.0514190000000028  | F | F | F |
|                    | 0.4155776033686038 | 0.0831785534718108  | 0.3121731084064763  | T | T | T |
|                    | 0.3337003122284727 | 0.1675260039200381  | 0.2261263289772728  | T | T | T |
|                    | 0.5000000000000000 | 0.0000000000000000  | 0.1392870000000030  | F | F | F |
|                    | 0.5006764639514216 | 0.0081775148944132  | 0.3990573519055047  | T | T | T |
|                    | 0.6666669999999968 | 0.0833330000000032  | 0.0514190000000028  | F | F | F |
|                    | 0.6665948033244007 | 0.0828914972560071  | 0.3133125632845335  | T | T | T |
|                    | 0.5834776313155245 | 0.1667012368877394  | 0.2260705736177968  | T | T | T |
|                    | 0.7500000000000000 | 0.0000000000000000  | 0.1392870000000030  | F | F | F |
|                    | 0.7559825456060878 | 0.0117183335726239  | 0.4000292673068415  | T | T | T |
|                    | 0.9166669999999968 | 0.0833330000000032  | 0.0514190000000028  | F | F | F |
|                    | 0.9165435109554707 | 0.0826359038558664  | 0.3127596263858692  | T | T | T |
|                    | 0.8332631916821427 | 0.1665930693746702  | 0.2261740673885271  | T | T | T |
|                    | 0.0000000000000000 | 0.2500000000000000  | 0.1392870000000030  | F | F | F |
|                    | 0.9924895441025328 | 0.2440091758187677  | 0.3996637526829190  | T | T | T |
|                    | 0.1666669999999968 | 0.3333330000000032  | 0.0514190000000028  | F | F | F |
|                    | 0.1679196676971770 | 0.3349081281840114  | 0.3156242449872906  | T | T | T |
|                    | 0.0841551627420216 | 0.4169797862012956  | 0.2270964936746154  | T | T | T |



|                    |                    |                    |       |
|--------------------|--------------------|--------------------|-------|
| 0.2500000000000000 | 0.2500000000000000 | 0.1392870000000030 | F F F |
| 0.2457580164489244 | 0.2391076980746760 | 0.4002182035360207 | T T T |
| 0.4166669999999968 | 0.3333330000000032 | 0.0514190000000028 | F F F |
| 0.4176633520085176 | 0.3359687963150790 | 0.3153778385039629 | T T T |
| 0.3336339951128693 | 0.4177500919972417 | 0.2278013631093785 | T T T |
| 0.5000000000000000 | 0.2500000000000000 | 0.1392870000000030 | F F F |
| 0.5006794925803888 | 0.2422809051464085 | 0.3991563133210079 | T T T |
| 0.6666669999999968 | 0.3333330000000032 | 0.0514190000000028 | F F F |
| 0.6663786207662028 | 0.3334905975514388 | 0.3132127500491677 | T T T |
| 0.5831844467343785 | 0.4176753922062417 | 0.2271168087281552 | T T T |
| 0.7500000000000000 | 0.2500000000000000 | 0.1392870000000030 | F F F |
| 0.7498514822101541 | 0.2497668157945725 | 0.4007281658250932 | T T T |
| 0.9166669999999968 | 0.3333330000000032 | 0.0514190000000028 | F F F |
| 0.9166090226256500 | 0.3332174535789960 | 0.3135573926686916 | T T T |
| 0.8331472568296761 | 0.4166455063558701 | 0.2262240069551282 | T T T |
| 0.0000000000000000 | 0.5000000000000000 | 0.1392870000000030 | F F F |
| 0.9922560678488637 | 0.4983836044517318 | 0.3995427910011458 | T T T |
| 0.1666669999999968 | 0.5833330000000032 | 0.0514190000000028 | F F F |
| 0.1677883933482107 | 0.5828459138925552 | 0.3155405447896484 | T T T |
| 0.0834013051694598 | 0.6661639707905422 | 0.2263322171589834 | T T T |
| 0.2500000000000000 | 0.5000000000000000 | 0.1392870000000030 | F F F |
| 0.4166669999999968 | 0.5833330000000032 | 0.0514190000000028 | F F F |
| 0.4165645368205588 | 0.5837018953807842 | 0.3184048977480600 | T T T |
| 0.3336538897981072 | 0.6662601667241290 | 0.2279708435096595 | T T T |
| 0.5000000000000000 | 0.5000000000000000 | 0.1392870000000030 | F F F |
| 0.6666669999999968 | 0.5833330000000032 | 0.0514190000000028 | F F F |
| 0.6660406917623405 | 0.5842064810719307 | 0.3170601197155349 | T T T |
| 0.5826703508708491 | 0.6667328158195929 | 0.2285186321070540 | T T T |
| 0.7500000000000000 | 0.5000000000000000 | 0.1392870000000030 | F F F |
| 0.7556352991693842 | 0.4936905687643360 | 0.3999916792339633 | T T T |
| 0.9166669999999968 | 0.5833330000000032 | 0.0514190000000028 | F F F |
| 0.9160827103157771 | 0.5844082921102185 | 0.3127440257301970 | T T T |
| 0.8321909189375276 | 0.6667238649764258 | 0.2269501804497978 | T T T |
| 0.0000000000000000 | 0.7500000000000000 | 0.1392870000000030 | F F F |
| 0.0073970721782217 | 0.7491866576355264 | 0.3988725470511767 | T T T |
| 0.1666669999999968 | 0.8333330000000032 | 0.0514190000000028 | F F F |
| 0.1668353176567337 | 0.8333243391271878 | 0.3122528878111410 | T T T |
| 0.0825112838844646 | 0.9163387495263180 | 0.2263216612488179 | T T T |
| 0.2500000000000000 | 0.7500000000000000 | 0.1392870000000030 | F F F |
| 0.2454782002699716 | 0.7558060812871332 | 0.4001547187026731 | T T T |
| 0.4166669999999968 | 0.8333330000000032 | 0.0514190000000028 | F F F |
| 0.4174026180019865 | 0.8320311085147054 | 0.3153211171700079 | T T T |
| 0.3334729168368611 | 0.9160028177029034 | 0.2262326552179630 | T T T |
| 0.5000000000000000 | 0.7500000000000000 | 0.1392870000000030 | F F F |
| 0.6666669999999968 | 0.8333330000000032 | 0.0514190000000028 | F F F |
| 0.6660537227276251 | 0.8320362420954055 | 0.3172095614757637 | T T T |
| 0.5831086369152700 | 0.9154497942235977 | 0.2272271241115575 | T T T |
| 0.7500000000000000 | 0.7500000000000000 | 0.1392870000000030 | F F F |
| 0.9166669999999968 | 0.8333330000000032 | 0.0514190000000028 | F F F |
| 0.9143086754123075 | 0.8322340912071482 | 0.3151626166401797 | T T T |
| 0.8321063493705765 | 0.9156041942984814 | 0.2270807364703273 | T T T |

|                    |                    |                     |                     |   |   |   |
|--------------------|--------------------|---------------------|---------------------|---|---|---|
|                    | 0.5009624609189132 | 0.7631719753041111  | 0.4246479094871205  | T | T | T |
|                    | 0.7678685171887167 | 0.7587907239829121  | 0.4266118433152570  | T | T | T |
|                    | 0.2340190178928907 | 0.4918902017205085  | 0.4263259028999755  | T | T | T |
|                    | 0.5008719762037899 | 0.4876233189164481  | 0.4248144860214893  | T | T | T |
| <b>4Au/Ni(111)</b> | 1.000000000000000  |                     |                     |   |   |   |
|                    | 8.6224000674449712 | -4.9781450000000014 | 0.0000000000000000  |   |   |   |
|                    | 0.0000000000000000 | 9.9562900000000010  | 0.0000000000000000  |   |   |   |
|                    | 0.0000000000000000 | 0.0000000000000000  | 23.1292800000000014 |   |   |   |
|                    | Ni                 | Au                  |                     |   |   |   |
|                    | 76                 | 4                   |                     |   |   |   |
|                    | Selective dynamics |                     |                     |   |   |   |
|                    | Direct             |                     |                     |   |   |   |
|                    | 0.0000000000000000 | 0.0000000000000000  | 0.1392870000000030  | F | F | F |
|                    | 0.0085994558756539 | 0.0082659675736281  | 0.3997748787289837  | T | T | T |
|                    | 0.1666669999999968 | 0.0833330000000032  | 0.0514190000000028  | F | F | F |
|                    | 0.1678657142006585 | 0.0843184710058296  | 0.3128166509317083  | T | T | T |
|                    | 0.0833183069826617 | 0.1670009009044335  | 0.2264378686667783  | T | T | T |
|                    | 0.2500000000000000 | 0.0000000000000000  | 0.1392870000000030  | F | F | F |
|                    | 0.2504763873431841 | 0.0001932359628967  | 0.3991955925547188  | T | T | T |
|                    | 0.4166669999999968 | 0.0833330000000032  | 0.0514190000000028  | F | F | F |
|                    | 0.4162889790859481 | 0.0833990924533552  | 0.3126041773369721  | T | T | T |
|                    | 0.3334820759085275 | 0.1670440415732699  | 0.2262081729923651  | T | T | T |
|                    | 0.5000000000000000 | 0.0000000000000000  | 0.1392870000000030  | F | F | F |
|                    | 0.5005510436835081 | 0.0084776434929168  | 0.4001110683327269  | T | T | T |
|                    | 0.6666669999999968 | 0.0833330000000032  | 0.0514190000000028  | F | F | F |
|                    | 0.6668903711250422 | 0.0832001782311025  | 0.3136230398242645  | T | T | T |
|                    | 0.5835926805202263 | 0.1668293812639874  | 0.2262637349352090  | T | T | T |
|                    | 0.7500000000000000 | 0.0000000000000000  | 0.1392870000000030  | F | F | F |
|                    | 0.7552005690625592 | 0.0107880824462683  | 0.4013180508736269  | T | T | T |
|                    | 0.9166669999999968 | 0.0833330000000032  | 0.0514190000000028  | F | F | F |
|                    | 0.9165847594348264 | 0.0831553495339463  | 0.3133024003621401  | T | T | T |
|                    | 0.8332849187151865 | 0.1665832868555910  | 0.2262348796654834  | T | T | T |
|                    | 0.0000000000000000 | 0.2500000000000000  | 0.1392870000000030  | F | F | F |
|                    | 0.9913845745832575 | 0.2433648596507325  | 0.4005196908458188  | T | T | T |
|                    | 0.1666669999999968 | 0.3333330000000032  | 0.0514190000000028  | F | F | F |
|                    | 0.1667419059864841 | 0.3334009715332655  | 0.3151035186670725  | T | T | T |
|                    | 0.0839657985446749 | 0.4168279719499068  | 0.2270413344947073  | T | T | T |
|                    | 0.2500000000000000 | 0.2500000000000000  | 0.1392870000000030  | F | F | F |
|                    | 0.2459236856637546 | 0.2402211600955937  | 0.4015440260432896  | T | T | T |
|                    | 0.4166669999999968 | 0.3333330000000032  | 0.0514190000000028  | F | F | F |
|                    | 0.4171906015747453 | 0.3343701328918414  | 0.3150631363078062  | T | T | T |
|                    | 0.3331513711974097 | 0.4169069060480552  | 0.2276288394886237  | T | T | T |
|                    | 0.5000000000000000 | 0.2500000000000000  | 0.1392870000000030  | F | F | F |
|                    | 0.5004237367576181 | 0.2420589091970626  | 0.4001672852990126  | T | T | T |
|                    | 0.6666669999999968 | 0.3333330000000032  | 0.0514190000000028  | F | F | F |
|                    | 0.6666624450093863 | 0.3334553914494691  | 0.3135378165332696  | T | T | T |
|                    | 0.5831654986666663 | 0.4171341448622314  | 0.2271175482047454  | T | T | T |
|                    | 0.7500000000000000 | 0.2500000000000000  | 0.1392870000000030  | F | F | F |
|                    | 0.7493244120185381 | 0.2496833396499838  | 0.4006274006698547  | T | T | T |
|                    | 0.9166669999999968 | 0.3333330000000032  | 0.0514190000000028  | F | F | F |
|                    | 0.9161363139541052 | 0.3329520616468571  | 0.3136586901305023  | T | T | T |

|                    |                    |                     |                     |   |   |   |
|--------------------|--------------------|---------------------|---------------------|---|---|---|
|                    | 0.8332406343472343 | 0.4166704644838646  | 0.2263612670122370  | T | T | T |
|                    | 0.0000000000000000 | 0.5000000000000000  | 0.1392870000000030  | F | F | F |
|                    | 0.9911167654056285 | 0.4981141193473988  | 0.4004365922232651  | T | T | T |
|                    | 0.1666669999999968 | 0.5833330000000032  | 0.0514190000000028  | F | F | F |
|                    | 0.1666703835938677 | 0.5831316403536917  | 0.3149965954126301  | T | T | T |
|                    | 0.0833120076405720 | 0.6663508410152303  | 0.2264308553197978  | T | T | T |
|                    | 0.2500000000000000 | 0.5000000000000000  | 0.1392870000000030  | F | F | F |
|                    | 0.4166669999999968 | 0.5833330000000032  | 0.0514190000000028  | F | F | F |
|                    | 0.4165330423746454 | 0.5831790650803228  | 0.3169748238292129  | T | T | T |
|                    | 0.3334688766496257 | 0.6661849705173069  | 0.2277721805143145  | T | T | T |
|                    | 0.5000000000000000 | 0.5000000000000000  | 0.1392870000000030  | F | F | F |
|                    | 0.6666669999999968 | 0.5833330000000032  | 0.0514190000000028  | F | F | F |
|                    | 0.6662466071347666 | 0.5834084066507543  | 0.3160637260666945  | T | T | T |
|                    | 0.5827061650972993 | 0.6664440070058433  | 0.2281215320390118  | T | T | T |
|                    | 0.7500000000000000 | 0.5000000000000000  | 0.1392870000000030  | F | F | F |
|                    | 0.7548384083018291 | 0.4941634404231721  | 0.4014205034491738  | T | T | T |
|                    | 0.9166669999999968 | 0.5833330000000032  | 0.0514190000000028  | F | F | F |
|                    | 0.9161135745416331 | 0.5838647825724621  | 0.3132799565050348  | T | T | T |
|                    | 0.8325371233635792 | 0.6666634467555070  | 0.2269413205427426  | T | T | T |
|                    | 0.0000000000000000 | 0.7500000000000000  | 0.1392870000000030  | F | F | F |
|                    | 0.0082338031011489 | 0.7501078148945979  | 0.3997659850669848  | T | T | T |
|                    | 0.1666669999999968 | 0.8333330000000032  | 0.0514190000000028  | F | F | F |
|                    | 0.1669296343235729 | 0.8332854511966019  | 0.3127689365952619  | T | T | T |
|                    | 0.0829384977586045 | 0.9164653761282082  | 0.2264230326114713  | T | T | T |
|                    | 0.2500000000000000 | 0.7500000000000000  | 0.1392870000000030  | F | F | F |
|                    | 0.2457624142669772 | 0.7556788041348312  | 0.4013378121390971  | T | T | T |
|                    | 0.4166669999999968 | 0.8333330000000032  | 0.0514190000000028  | F | F | F |
|                    | 0.4170975534341395 | 0.8326472057135419  | 0.3150392594293407  | T | T | T |
|                    | 0.3335168585505386 | 0.9161562281220341  | 0.2263725292907779  | T | T | T |
|                    | 0.5000000000000000 | 0.7500000000000000  | 0.1392870000000030  | F | F | F |
|                    | 0.6666669999999968 | 0.8333330000000032  | 0.0514190000000028  | F | F | F |
|                    | 0.6664137500211140 | 0.8330456318898669  | 0.3159524696421343  | T | T | T |
|                    | 0.5830725332600650 | 0.9156901169162239  | 0.2271352094058656  | T | T | T |
|                    | 0.7500000000000000 | 0.7500000000000000  | 0.1392870000000030  | F | F | F |
|                    | 0.9166669999999968 | 0.8333330000000032  | 0.0514190000000028  | F | F | F |
|                    | 0.9158277462885991 | 0.8329742247868737  | 0.3146034282804919  | T | T | T |
|                    | 0.8323368464993095 | 0.9157402839925339  | 0.2270464402132575  | T | T | T |
|                    | 0.5006487610030135 | 0.7645624956264570  | 0.4229942798680142  | T | T | T |
|                    | 0.7680666628670991 | 0.7591073774342547  | 0.4212330534664446  | T | T | T |
|                    | 0.2331444553170314 | 0.4917152626286949  | 0.4209335758715582  | T | T | T |
|                    | 0.5006049235994396 | 0.4861416914207624  | 0.4233240016275204  | T | T | T |
| <b>4Ni/Cu(111)</b> | 1.0000000000000000 |                     |                     |   |   |   |
|                    | 8.8905944857135406 | -5.1329871195825199 | -0.0000000000000010 |   |   |   |
|                    | 0.0000000000000000 | 10.2659742391650006 | 0.0000000000000010  |   |   |   |
|                    | 0.0000000000000000 | 0.0000000000000000  | 23.3821328661704015 |   |   |   |
|                    | Ni                 | Cu                  |                     |   |   |   |
|                    | 4                  | 76                  |                     |   |   |   |
|                    | Selective dynamics |                     |                     |   |   |   |
|                    | Direct             |                     |                     |   |   |   |
|                    | 0.2554760085567125 | 0.5027380042783633  | 0.3795913452782926  | T | T | T |
|                    | 0.5002006844501565 | 0.5048820624198100  | 0.3796221083510858  | T | T | T |

|                    |                    |                    |   |   |   |
|--------------------|--------------------|--------------------|---|---|---|
| 0.5002006844501565 | 0.7453186220303465 | 0.3796221083510858 | T | T | T |
| 0.7455471980296409 | 0.7477735990148204 | 0.3798039165446809 | T | T | T |
| 0.0000000000000000 | 0.0000000000000000 | 0.1155258754999977 | F | F | F |
| 0.9975049554731967 | 0.9979020871516653 | 0.3839133856350898 | T | T | T |
| 0.1666666667000030 | 0.0833333332999970 | 0.0259047434999999 | F | F | F |
| 0.1665251965970498 | 0.0835605570289317 | 0.2953480953971166 | T | T | T |
| 0.0832230485940784 | 0.1665745986143889 | 0.2053714779317417 | T | T | T |
| 0.2500000000000000 | 0.0000000000000000 | 0.1155258754999977 | F | F | F |
| 0.2498946354206169 | 0.9999473177103084 | 0.3839339218213809 | T | T | T |
| 0.4166666667000030 | 0.0833333332999970 | 0.0259047434999999 | F | F | F |
| 0.4167085371931734 | 0.0833542685465858 | 0.2952280837370509 | T | T | T |
| 0.3332771417252900 | 0.1665832941918737 | 0.2054167197233951 | T | T | T |
| 0.5000000000000000 | 0.0000000000000000 | 0.1155258754999977 | F | F | F |
| 0.4998298648479604 | 0.9969394650687491 | 0.3836757847810190 | T | T | T |
| 0.6666666667000030 | 0.0833333332999970 | 0.0259047434999999 | F | F | F |
| 0.6666012163836683 | 0.0830879982042347 | 0.2948310091754891 | T | T | T |
| 0.5832504671432162 | 0.1666252336216090 | 0.2053917157976457 | T | T | T |
| 0.7500000000000000 | 0.0000000000000000 | 0.1155258754999977 | F | F | F |
| 0.7475114158913598 | 0.9953662528537848 | 0.3836045620480064 | T | T | T |
| 0.9166666667000030 | 0.0833333332999970 | 0.0259047434999999 | F | F | F |
| 0.9164476638930878 | 0.0832847340781981 | 0.2950280332272470 | T | T | T |
| 0.8333043767590809 | 0.1666119556271823 | 0.2053698230384313 | T | T | T |
| 0.0000000000000000 | 0.2500000000000000 | 0.1155258754999977 | F | F | F |
| 0.0028011043362000 | 0.2520409233337872 | 0.3834841390931771 | T | T | T |
| 0.1666666667000030 | 0.3333333332999970 | 0.0259047434999999 | F | F | F |
| 0.1670127948987385 | 0.3338273204048505 | 0.2943634074829120 | T | T | T |
| 0.0830658258437538 | 0.4165329129718813 | 0.2049428292374600 | T | T | T |
| 0.2500000000000000 | 0.2500000000000000 | 0.1155258754999977 | F | F | F |
| 0.2523769158143949 | 0.2544324475994770 | 0.3838209288624768 | T | T | T |
| 0.4166666667000030 | 0.3333333332999970 | 0.0259047434999999 | F | F | F |
| 0.4169741180267792 | 0.3341871169185637 | 0.2944955251525627 | T | T | T |
| 0.3330593168448317 | 0.4162496422670685 | 0.2044256142285690 | T | T | T |
| 0.5000000000000000 | 0.2500000000000000 | 0.1155258754999977 | F | F | F |
| 0.4998298648479604 | 0.2528903997792114 | 0.3836757847810190 | T | T | T |
| 0.6666666667000030 | 0.3333333332999970 | 0.0259047434999999 | F | F | F |
| 0.6666012163836683 | 0.3335132180794176 | 0.2948310091754891 | T | T | T |
| 0.5833282863195635 | 0.4164425576053006 | 0.2048892196099743 | T | T | T |
| 0.7500000000000000 | 0.2500000000000000 | 0.1155258754999977 | F | F | F |
| 0.7500965742905024 | 0.2500482871452476 | 0.3832559790794932 | T | T | T |
| 0.9166666667000030 | 0.3333333332999970 | 0.0259047434999999 | F | F | F |
| 0.9168289439264257 | 0.3334144719132084 | 0.2947603735460049 | T | T | T |
| 0.8333043767590809 | 0.4166924212319074 | 0.2053698230384313 | T | T | T |
| 0.0000000000000000 | 0.5000000000000000 | 0.1155258754999977 | F | F | F |
| 0.0028011043362000 | 0.5007601810024127 | 0.3834841390931771 | T | T | T |
| 0.1666666667000030 | 0.5833333332999970 | 0.0259047434999999 | F | F | F |
| 0.1670127948987385 | 0.5831854743938862 | 0.2943634074829120 | T | T | T |
| 0.0832230485940784 | 0.6666484500796983 | 0.2053714779317417 | T | T | T |
| 0.2500000000000000 | 0.5000000000000000 | 0.1155258754999977 | F | F | F |
| 0.4166666667000030 | 0.5833333332999970 | 0.0259047434999999 | F | F | F |
| 0.4166933309487177 | 0.5833466654243509 | 0.2929753591354824 | T | T | T |
| 0.3330593168448317 | 0.6668096746777792 | 0.2044256142285690 | T | T | T |

|                    |                    |                     |                     |   |   |   |
|--------------------|--------------------|---------------------|---------------------|---|---|---|
|                    | 0.5000000000000000 | 0.5000000000000000  | 0.1155258754999977  | F | F | F |
|                    | 0.6666666667000030 | 0.5833333332999970  | 0.0259047434999999  | F | F | F |
|                    | 0.6663100595880920 | 0.5832318821629627  | 0.2937891654346316  | T | T | T |
|                    | 0.5834575083711968 | 0.6667287542355993  | 0.2040160347821072  | T | T | T |
|                    | 0.7500000000000000 | 0.5000000000000000  | 0.1155258754999977  | F | F | F |
|                    | 0.7475114158913598 | 0.5021451630375751  | 0.3836045620480064  | T | T | T |
|                    | 0.9166666667000030 | 0.5833333332999970  | 0.0259047434999999  | F | F | F |
|                    | 0.9164476638930878 | 0.5831629297148808  | 0.2950280332272470  | T | T | T |
|                    | 0.8335180421596888 | 0.6665588867777714  | 0.2049343128154746  | T | T | T |
|                    | 0.0000000000000000 | 0.7500000000000000  | 0.1155258754999977  | F | F | F |
|                    | 0.9975049554731967 | 0.7496028683215314  | 0.3839133856350898  | T | T | T |
|                    | 0.1666666667000030 | 0.8333333332999970  | 0.0259047434999999  | F | F | F |
|                    | 0.1665251965970498 | 0.8329646394681092  | 0.2953480953971166  | T | T | T |
|                    | 0.0833313419865078 | 0.9166656710432619  | 0.2054554425093968  | T | T | T |
|                    | 0.2500000000000000 | 0.7500000000000000  | 0.1155258754999977  | F | F | F |
|                    | 0.2523769158143949 | 0.7479444682149179  | 0.3838209288624768  | T | T | T |
|                    | 0.4166666667000030 | 0.8333333332999970  | 0.0259047434999999  | F | F | F |
|                    | 0.4169741180267792 | 0.8327870010082066  | 0.2944955251525627  | T | T | T |
|                    | 0.3332771417252900 | 0.9166938476334252  | 0.2054167197233951  | T | T | T |
|                    | 0.5000000000000000 | 0.7500000000000000  | 0.1155258754999977  | F | F | F |
|                    | 0.6666666667000030 | 0.8333333332999970  | 0.0259047434999999  | F | F | F |
|                    | 0.6663100595880920 | 0.8330781773251132  | 0.2937891654346316  | T | T | T |
|                    | 0.5833282863195635 | 0.9168857288142647  | 0.2048892196099743  | T | T | T |
|                    | 0.7500000000000000 | 0.7500000000000000  | 0.1155258754999977  | F | F | F |
|                    | 0.9166666667000030 | 0.8333333332999970  | 0.0259047434999999  | F | F | F |
|                    | 0.9157565126010212 | 0.8328782562505097  | 0.2947105293710521  | T | T | T |
|                    | 0.8335180421596888 | 0.9169591554819263  | 0.2049343128154746  | T | T | T |
| <b>4Pd/Cu(111)</b> | 1.0000000000000000 |                     |                     |   |   |   |
|                    | 8.8905944857135406 | -5.1329871195825199 | -0.0000000000000010 |   |   |   |
|                    | 0.0000000000000000 | 10.2659742391650006 | 0.0000000000000010  |   |   |   |
|                    | 0.0000000000000000 | 0.0000000000000000  | 23.3821328661704015 |   |   |   |
|                    | Pd                 | Cu                  |                     |   |   |   |
|                    | 4                  | 76                  |                     |   |   |   |
|                    | Selective dynamics |                     |                     |   |   |   |
|                    | Direct             |                     |                     |   |   |   |
|                    | 0.2388553637119060 | 0.4944276818559530  | 0.3879366407066485  | T | T | T |
|                    | 0.5000470712628982 | 0.4918118226596278  | 0.3881235559680931  | T | T | T |
|                    | 0.5000470712628982 | 0.7582352486032704  | 0.3881235559680931  | T | T | T |
|                    | 0.7613193269109146 | 0.7556596634554609  | 0.3875025162242949  | T | T | T |
|                    | 0.0000000000000000 | 0.0000000000000000  | 0.1155258754999977  | F | F | F |
|                    | 0.0057965395263722 | 0.0045409569244796  | 0.3834416801086604  | T | T | T |
|                    | 0.1666666667000030 | 0.0833333332999970  | 0.0259047434999999  | F | F | F |
|                    | 0.1671073225515585 | 0.0835659773053692  | 0.2936932883504610  | T | T | T |
|                    | 0.0832034476735970 | 0.1670713167230957  | 0.2050477785413491  | T | T | T |
|                    | 0.2500000000000000 | 0.0000000000000000  | 0.1155258754999977  | F | F | F |
|                    | 0.2506137766917007 | 0.0003068883458468  | 0.3826749017222397  | T | T | T |
|                    | 0.4166666667000030 | 0.0833333332999970  | 0.0259047434999999  | F | F | F |
|                    | 0.4170664365887973 | 0.0835332182443977  | 0.2937212468456778  | T | T | T |
|                    | 0.3337700769524687 | 0.1673391702497540  | 0.2048077682044678  | T | T | T |
|                    | 0.5000000000000000 | 0.0000000000000000  | 0.1155258754999977  | F | F | F |
|                    | 0.4998558762495762 | 0.0047664505529497  | 0.3836106235752084  | T | T | T |

|                    |                    |                    |       |
|--------------------|--------------------|--------------------|-------|
| 0.666666667000030  | 0.083333332999970  | 0.025904743499999  | F F F |
| 0.6666694026040290 | 0.0830653618316433 | 0.2943923091075007 | T T T |
| 0.5838092579297367 | 0.1669046290148728 | 0.2049461368145842 | T T T |
| 0.750000000000000  | 0.000000000000000  | 0.1155258754999977 | F F F |
| 0.7531465692559891 | 0.0060700317247111 | 0.3843406404205680 | T T T |
| 0.916666667000030  | 0.083333332999970  | 0.025904743499999  | F F F |
| 0.9162648936131319 | 0.0827121136992872 | 0.2943369759871572 | T T T |
| 0.8333450762639387 | 0.1667027833654160 | 0.2051349142467345 | T T T |
| 0.000000000000000  | 0.250000000000000  | 0.1155258754999977 | F F F |
| 0.9945016425538498 | 0.2453281392308924 | 0.3837050520245384 | T T T |
| 0.166666667000030  | 0.333333332999970  | 0.025904743499999  | F F F |
| 0.1660020479212179 | 0.3323994983771215 | 0.2944517632609021 | T T T |
| 0.0833263365813863 | 0.4166631683406976 | 0.2049885054294762 | T T T |
| 0.250000000000000  | 0.250000000000000  | 0.1155258754999977 | F F F |
| 0.2469778771754179 | 0.2437990299486543 | 0.3840261462715162 | T T T |
| 0.416666667000030  | 0.333333332999970  | 0.025904743499999  | F F F |
| 0.4163869637220543 | 0.3328676539125013 | 0.2942653427361464 | T T T |
| 0.3333775528172538 | 0.4171221993846572 | 0.2050724184773358 | T T T |
| 0.500000000000000  | 0.250000000000000  | 0.1155258754999977 | F F F |
| 0.4998558762495762 | 0.2450894256966265 | 0.3836106235752084 | T T T |
| 0.666666667000030  | 0.333333332999970  | 0.025904743499999  | F F F |
| 0.6666694026040290 | 0.3336040406723768 | 0.2943923091075007 | T T T |
| 0.5834964102118505 | 0.4170774419975274 | 0.2050827350003175 | T T T |
| 0.750000000000000  | 0.250000000000000  | 0.1155258754999977 | F F F |
| 0.7494001788426345 | 0.2497000894213173 | 0.3830010451051322 | T T T |
| 0.916666667000030  | 0.333333332999970  | 0.025904743499999  | F F F |
| 0.9166745983790605 | 0.3333372991395223 | 0.2944462243001524 | T T T |
| 0.8333450762639387 | 0.4166422929985316 | 0.2051349142467345 | T T T |
| 0.000000000000000  | 0.500000000000000  | 0.1155258754999977 | F F F |
| 0.9945016425538498 | 0.4991735033229645 | 0.3837050520245384 | T T T |
| 0.166666667000030  | 0.583333332999970  | 0.025904743499999  | F F F |
| 0.1660020479212179 | 0.5836025494440875 | 0.2944517632609021 | T T T |
| 0.0832034476735970 | 0.6661321310505031 | 0.2050477785413491 | T T T |
| 0.250000000000000  | 0.500000000000000  | 0.1155258754999977 | F F F |
| 0.416666667000030  | 0.583333332999970  | 0.025904743499999  | F F F |
| 0.4159739798098130 | 0.5829869898549020 | 0.2955747596635092 | T T T |
| 0.3333775528172538 | 0.6662553535326055 | 0.2050724184773358 | T T T |
| 0.500000000000000  | 0.500000000000000  | 0.1155258754999977 | F F F |
| 0.666666667000030  | 0.583333332999970  | 0.025904743499999  | F F F |
| 0.6667755533481454 | 0.5834481826132176 | 0.2947786710364113 | T T T |
| 0.5826916872199419 | 0.6663458436599754 | 0.2050713846517027 | T T T |
| 0.750000000000000  | 0.500000000000000  | 0.1155258754999977 | F F F |
| 0.7531465692559891 | 0.4970765375312780 | 0.3843406404205680 | T T T |
| 0.916666667000030  | 0.583333332999970  | 0.025904743499999  | F F F |
| 0.9162648936131319 | 0.5835527798138358 | 0.2943369759871572 | T T T |
| 0.8326608222332368 | 0.6662657544184896 | 0.2049361358464594 | T T T |
| 0.000000000000000  | 0.750000000000000  | 0.1155258754999977 | F F F |
| 0.0057965395263722 | 0.7512555826018925 | 0.3834416801086604 | T T T |
| 0.166666667000030  | 0.833333332999970  | 0.025904743499999  | F F F |
| 0.1671073225515585 | 0.8335413451461733 | 0.2936932883504610 | T T T |
| 0.0830782819831555 | 0.9165391410415822 | 0.2046192746670954 | T T T |

|                    |                    |                     |                     |   |   |   |
|--------------------|--------------------|---------------------|---------------------|---|---|---|
|                    | 0.2500000000000000 | 0.7500000000000000  | 0.1155258754999977  | F | F | F |
|                    | 0.2469778771754179 | 0.7531788472267635  | 0.3840261462715162  | T | T | T |
|                    | 0.4166666667000030 | 0.833333332999970   | 0.0259047434999999  | F | F | F |
|                    | 0.4163869637220543 | 0.8335193097095441  | 0.2942653427361464  | T | T | T |
|                    | 0.3337700769524687 | 0.9164309068027237  | 0.2048077682044678  | T | T | T |
|                    | 0.5000000000000000 | 0.7500000000000000  | 0.1155258754999977  | F | F | F |
|                    | 0.6666666667000030 | 0.833333332999970   | 0.0259047434999999  | F | F | F |
|                    | 0.6667755533481454 | 0.8333273706349189  | 0.2947786710364113  | T | T | T |
|                    | 0.5834964102118505 | 0.9164189683143249  | 0.2050827350003175  | T | T | T |
|                    | 0.7500000000000000 | 0.7500000000000000  | 0.1155258754999977  | F | F | F |
|                    | 0.9166666667000030 | 0.833333332999970   | 0.0259047434999999  | F | F | F |
|                    | 0.9180379395784826 | 0.8340189697392333  | 0.2937711580236169  | T | T | T |
|                    | 0.8326608222332368 | 0.9163950679147561  | 0.2049361358464594  | T | T | T |
| <b>4Pt/Cu(111)</b> | 1.0000000000000000 |                     |                     |   |   |   |
|                    | 8.8905944857135406 | -5.1329871195825199 | -0.0000000000000010 |   |   |   |
|                    | 0.0000000000000000 | 10.2659742391650006 | 0.0000000000000010  |   |   |   |
|                    | 0.0000000000000000 | 0.0000000000000000  | 23.3821328661704015 |   |   |   |
|                    | Pt                 | Cu                  |                     |   |   |   |
|                    | 4                  | 76                  |                     |   |   |   |
|                    | Selective dynamics |                     |                     |   |   |   |
|                    | Direct             |                     |                     |   |   |   |
|                    | 0.2396110035812598 | 0.4948055017906299  | 0.3861162477251625  | T | T | T |
|                    | 0.5000598766450608 | 0.4930974882799006  | 0.3866946362013479  | T | T | T |
|                    | 0.5000598766450608 | 0.7569623883651602  | 0.3866946362013479  | T | T | T |
|                    | 0.7606230839406507 | 0.7553115419703218  | 0.3858607100432607  | T | T | T |
|                    | 0.0000000000000000 | 0.0000000000000000  | 0.1155258754999977  | F | F | F |
|                    | 0.0051034744095659 | 0.0037707963155853  | 0.3846704541625598  | T | T | T |
|                    | 0.1666666667000030 | 0.083333332999970   | 0.0259047434999999  | F | F | F |
|                    | 0.1669106461766106 | 0.0835348178631676  | 0.2944301520414854  | T | T | T |
|                    | 0.0831945393768976 | 0.1667609916342911  | 0.2050864571141631  | T | T | T |
|                    | 0.2500000000000000 | 0.0000000000000000  | 0.1155258754999977  | F | F | F |
|                    | 0.2506032542244938 | 0.0003016271122505  | 0.3833475430992195  | T | T | T |
|                    | 0.4166666667000030 | 0.083333332999970   | 0.0259047434999999  | F | F | F |
|                    | 0.4170245489028517 | 0.0835122744014214  | 0.2944644175472177  | T | T | T |
|                    | 0.3335663006820653 | 0.1669105511971338  | 0.2049952170832725  | T | T | T |
|                    | 0.5000000000000000 | 0.0000000000000000  | 0.1155258754999977  | F | F | F |
|                    | 0.4998080780987522 | 0.0038971302719446  | 0.3847446688755838  | T | T | T |
|                    | 0.6666666667000030 | 0.083333332999970   | 0.0259047434999999  | F | F | F |
|                    | 0.6670007412039496 | 0.0837297617370467  | 0.2947287364156708  | T | T | T |
|                    | 0.5835195038760475 | 0.1667597519880317  | 0.2052128037296796  | T | T | T |
|                    | 0.7500000000000000 | 0.0000000000000000  | 0.1155258754999977  | F | F | F |
|                    | 0.7528418896786064 | 0.0051992731730337  | 0.3854969681956533  | T | T | T |
|                    | 0.9166666667000030 | 0.083333332999970   | 0.0259047434999999  | F | F | F |
|                    | 0.9165535324328786 | 0.0834798067762677  | 0.2948175298703930  | T | T | T |
|                    | 0.8333481787654478 | 0.1667439061719733  | 0.2052787940289207  | T | T | T |
|                    | 0.0000000000000000 | 0.2500000000000000  | 0.1155258754999977  | F | F | F |
|                    | 0.9952468041894207 | 0.2460158071427330  | 0.3846797418849377  | T | T | T |
|                    | 0.1666666667000030 | 0.333333332999970   | 0.0259047434999999  | F | F | F |
|                    | 0.1648915910559197 | 0.3309903063956767  | 0.2938831165859455  | T | T | T |
|                    | 0.0829188191219430 | 0.4164594096109724  | 0.2048474382333723  | T | T | T |
|                    | 0.2500000000000000 | 0.2500000000000000  | 0.1155258754999977  | F | F | F |

|                    |                    |                    |   |   |   |
|--------------------|--------------------|--------------------|---|---|---|
| 0.2472010505227686 | 0.2446812935824809 | 0.3853250635305656 | T | T | T |
| 0.4166666667000030 | 0.333333332999970  | 0.0259047434999999 | F | F | F |
| 0.4162271251315062 | 0.3314707569951025 | 0.2939401812302762 | T | T | T |
| 0.3332332111765837 | 0.4166816100304089 | 0.2047103625090401 | T | T | T |
| 0.5000000000000000 | 0.2500000000000000 | 0.1155258754999977 | F | F | F |
| 0.4998080780987522 | 0.2459109478268076 | 0.3847446688755838 | T | T | T |
| 0.6666666667000030 | 0.333333332999970  | 0.0259047434999999 | F | F | F |
| 0.6670007412039496 | 0.3332709793668940 | 0.2947287364156708 | T | T | T |
| 0.5836120207270383 | 0.4166751979696173 | 0.2048951374702668 | T | T | T |
| 0.7500000000000000 | 0.2500000000000000 | 0.1155258754999977 | F | F | F |
| 0.7494244039795745 | 0.2497122019897873 | 0.3832768661544605 | T | T | T |
| 0.9166666667000030 | 0.333333332999970  | 0.0259047434999999 | F | F | F |
| 0.9162133219920605 | 0.3331066609460294 | 0.2947039883989362 | T | T | T |
| 0.8333481787654478 | 0.4166042726934833 | 0.2052787940289207 | T | T | T |
| 0.0000000000000000 | 0.5000000000000000 | 0.1155258754999977 | F | F | F |
| 0.9952468041894207 | 0.4992309970466877 | 0.3846797418849377 | T | T | T |
| 0.1666666667000030 | 0.583333332999970  | 0.0259047434999999 | F | F | F |
| 0.1648915910559197 | 0.5839012845602340 | 0.2938831165859455 | T | T | T |
| 0.0831945393768976 | 0.6664335478426082 | 0.2050864571141631 | T | T | T |
| 0.2500000000000000 | 0.5000000000000000 | 0.1155258754999977 | F | F | F |
| 0.4166666667000030 | 0.583333332999970  | 0.0259047434999999 | F | F | F |
| 0.4155354488610641 | 0.5827677243805311 | 0.2936787352803520 | T | T | T |
| 0.3332332111765837 | 0.6665516012461836 | 0.2047103625090401 | T | T | T |
| 0.5000000000000000 | 0.5000000000000000 | 0.1155258754999977 | F | F | F |
| 0.6666666667000030 | 0.583333332999970  | 0.0259047434999999 | F | F | F |
| 0.6674894124932891 | 0.5825112601082481 | 0.2936257392399924 | T | T | T |
| 0.5829786136981880 | 0.6664893068991020 | 0.2045423450928894 | T | T | T |
| 0.7500000000000000 | 0.5000000000000000 | 0.1155258754999977 | F | F | F |
| 0.7528418896786064 | 0.4976426165055727 | 0.3854969681956533 | T | T | T |
| 0.9166666667000030 | 0.583333332999970  | 0.0259047434999999 | F | F | F |
| 0.9165535324328786 | 0.5830737255566021 | 0.2948175298703930 | T | T | T |
| 0.8331440093192484 | 0.6662979316833102 | 0.2048105949838970 | T | T | T |
| 0.0000000000000000 | 0.7500000000000000 | 0.1155258754999977 | F | F | F |
| 0.0051034744095659 | 0.7513326780939806 | 0.3846704541625598 | T | T | T |
| 0.1666666667000030 | 0.833333332999970  | 0.0259047434999999 | F | F | F |
| 0.1669106461766106 | 0.8333758282134340 | 0.2944301520414854 | T | T | T |
| 0.0833099802092008 | 0.9166549901546048 | 0.2048388789379061 | T | T | T |
| 0.2500000000000000 | 0.7500000000000000 | 0.1155258754999977 | F | F | F |
| 0.2472010505227686 | 0.7525197569402877 | 0.3853250635305656 | T | T | T |
| 0.4166666667000030 | 0.833333332999970  | 0.0259047434999999 | F | F | F |
| 0.4162271251315062 | 0.8347563680363947 | 0.2939401812302762 | T | T | T |
| 0.3335663006820653 | 0.9166557495849332 | 0.2049952170832725 | T | T | T |
| 0.5000000000000000 | 0.7500000000000000 | 0.1155258754999977 | F | F | F |
| 0.6666666667000030 | 0.833333332999970  | 0.0259047434999999 | F | F | F |
| 0.6674894124932891 | 0.8349781522850321 | 0.2936257392399924 | T | T | T |
| 0.5836120207270383 | 0.9169368228574299 | 0.2048951374702668 | T | T | T |
| 0.7500000000000000 | 0.7500000000000000 | 0.1155258754999977 | F | F | F |
| 0.9166666667000030 | 0.833333332999970  | 0.0259047434999999 | F | F | F |
| 0.9190707952687234 | 0.8345353975843608 | 0.2935332643542807 | T | T | T |
| 0.8331440093192484 | 0.9168460777359471 | 0.2048105949838970 | T | T | T |
| (11) 4X-PL         |                    |                    |   |   |   |



|                    |                    |                     |                     |       |
|--------------------|--------------------|---------------------|---------------------|-------|
| <b>4Cu/Ni(111)</b> | 1.00000000000000   |                     |                     |       |
|                    | 8.6224000674449712 | -4.9781450000000014 | 0.0000000000000000  |       |
|                    | 0.0000000000000000 | 9.9562900000000010  | 0.0000000000000000  |       |
|                    | 0.0000000000000000 | 0.0000000000000000  | 23.1292800000000014 |       |
|                    | Ni                 | Cu                  |                     |       |
|                    | 76                 | 4                   |                     |       |
|                    | Selective dynamics |                     |                     |       |
|                    | Direct             |                     |                     |       |
|                    | 0.0000000000000000 | 0.0000000000000000  | 0.1392870000000030  | F F F |
|                    | 0.1666669999999968 | 0.0833330000000032  | 0.0514190000000028  | F F F |
| 0.1668332361190465 | 0.0833125483210679 | 0.3149436966005155  | T T T               |       |
| 0.0833987759063533 | 0.1670039211050423 | 0.2271975292375217  | T T T               |       |
| 0.2500000000000000 | 0.0000000000000000 | 0.1392870000000030  | F F F               |       |
| 0.2524671079811611 | 0.9973334396251801 | 0.4006477025369790  | T T T               |       |
| 0.4166669999999968 | 0.0833330000000032 | 0.0514190000000028  | F F F               |       |
| 0.4163048536018081 | 0.0837148486150454 | 0.3141588761010610  | T T T               |       |
| 0.3332424971445889 | 0.1667533461759376 | 0.2267332346955442  | T T T               |       |
| 0.5000000000000000 | 0.0000000000000000 | 0.1392870000000030  | F F F               |       |
| 0.5001787556305146 | 0.9998184332921838 | 0.4012270438437753  | T T T               |       |
| 0.6666669999999968 | 0.0833330000000032 | 0.0514190000000028  | F F F               |       |
| 0.6669540633532804 | 0.0834433849693568 | 0.3141340914075386  | T T T               |       |
| 0.5832909274234623 | 0.1669056444344079 | 0.2268098814714392  | T T T               |       |
| 0.7500000000000000 | 0.0000000000000000 | 0.1392870000000030  | F F F               |       |
| 0.7479537728451220 | 0.0023321626317383 | 0.4009423178239260  | T T T               |       |
| 0.9166669999999968 | 0.0833330000000032 | 0.0514190000000028  | F F F               |       |
| 0.9170675485470667 | 0.0829324514529333 | 0.3149733703289002  | T T T               |       |
| 0.8333115942047655 | 0.1666884057952345 | 0.2266269547615138  | T T T               |       |
| 0.0000000000000000 | 0.2500000000000000 | 0.1392870000000030  | F F F               |       |
| 0.9976678373682617 | 0.2520462271548780 | 0.4009423178239260  | T T T               |       |
| 0.1666669999999968 | 0.3333330000000032 | 0.0514190000000028  | F F F               |       |
| 0.1670499538401700 | 0.3329709888761201 | 0.3149755407560590  | T T T               |       |
| 0.0832773991176978 | 0.4167015236299392 | 0.2266970821827599  | T T T               |       |
| 0.2500000000000000 | 0.2500000000000000 | 0.1392870000000030  | F F F               |       |
| 0.4166669999999968 | 0.3333330000000032 | 0.0514190000000028  | F F F               |       |
| 0.4166766399432902 | 0.3331436784034665 | 0.3149491583002373  | T T T               |       |
| 0.3329906025334068 | 0.4165969369575961 | 0.2271912686732378  | T T T               |       |
| 0.5000000000000000 | 0.2500000000000000 | 0.1392870000000030  | F F F               |       |
| 0.5026949285184159 | 0.2475710593805829 | 0.4006318451285011  | T T T               |       |
| 0.6666669999999968 | 0.3333330000000032 | 0.0514190000000028  | F F F               |       |
| 0.6663512459780989 | 0.3336487540219011 | 0.3139445281341935  | T T T               |       |
| 0.5830917398962612 | 0.4169082601037388 | 0.2267241163649771  | T T T               |       |
| 0.7500000000000000 | 0.2500000000000000 | 0.1392870000000030  | F F F               |       |
| 0.7500745400406927 | 0.2499254599593073 | 0.4011268631235438  | T T T               |       |
| 0.9166669999999968 | 0.3333330000000032 | 0.0514190000000028  | F F F               |       |
| 0.9165566150306432 | 0.3330459366467196 | 0.3141340914075386  | T T T               |       |
| 0.8330943555655921 | 0.4167090725765377 | 0.2268098814714392  | T T T               |       |
| 0.0000000000000000 | 0.5000000000000000 | 0.1392870000000030  | F F F               |       |
| 0.0001815667078162 | 0.4998212443694783 | 0.4012270438437753  | T T T               |       |
| 0.1666669999999968 | 0.5833330000000032 | 0.0514190000000028  | F F F               |       |
| 0.1669469095368896 | 0.5834365821689005 | 0.3141303657778067  | T T T               |       |
| 0.0832512943526353 | 0.6668719570112316 | 0.2268031882206998  | T T T               |       |

|                    |                    |                     |                     |   |   |   |
|--------------------|--------------------|---------------------|---------------------|---|---|---|
|                    | 0.2500000000000000 | 0.5000000000000000  | 0.1392870000000030  | F | F | F |
|                    | 0.2479697411381281 | 0.5023497397570580  | 0.4009335625449566  | T | T | T |
|                    | 0.4166669999999968 | 0.5833330000000032  | 0.0514190000000028  | F | F | F |
|                    | 0.4170852197163271 | 0.5829147802836729  | 0.3149340130451463  | T | T | T |
|                    | 0.3333251599991058 | 0.66667484000008942 | 0.2266070724587905  | T | T | T |
|                    | 0.5000000000000000 | 0.5000000000000000  | 0.1392870000000030  | F | F | F |
|                    | 0.6666669999999968 | 0.5833330000000032  | 0.0514190000000028  | F | F | F |
|                    | 0.6668563215965335 | 0.5833233600567098  | 0.3149491583002373  | T | T | T |
|                    | 0.5834030630424039 | 0.6670093974665932  | 0.2271912686732378  | T | T | T |
|                    | 0.7500000000000000 | 0.5000000000000000  | 0.1392870000000030  | F | F | F |
|                    | 0.7524289406194171 | 0.4973050714815841  | 0.4006318451285011  | T | T | T |
|                    | 0.9166669999999968 | 0.5833330000000032  | 0.0514190000000028  | F | F | F |
|                    | 0.9162851513849546 | 0.5836951463981919  | 0.3141588761010610  | T | T | T |
|                    | 0.8332456538240649 | 0.6667575028554111  | 0.2267332346955442  | T | T | T |
|                    | 0.0000000000000000 | 0.7500000000000000  | 0.1392870000000030  | F | F | F |
|                    | 0.0026665603748199 | 0.7475328920188389  | 0.4006477025369790  | T | T | T |
|                    | 0.1666669999999968 | 0.8333330000000032  | 0.0514190000000028  | F | F | F |
|                    | 0.1663407874371217 | 0.8336592125628783  | 0.3139473954781380  | T | T | T |
|                    | 0.0830916474149319 | 0.9169083525850681  | 0.2267239694730137  | T | T | T |
|                    | 0.2500000000000000 | 0.7500000000000000  | 0.1392870000000030  | F | F | F |
|                    | 0.2500747384822617 | 0.7499252615177383  | 0.4011150566374155  | T | T | T |
|                    | 0.4166669999999968 | 0.8333330000000032  | 0.0514190000000028  | F | F | F |
|                    | 0.4165634178310995 | 0.8330530904631104  | 0.3141303657778067  | T | T | T |
|                    | 0.3331280429887684 | 0.9167487056473647  | 0.2268031882206998  | T | T | T |
|                    | 0.5000000000000000 | 0.7500000000000000  | 0.1392870000000030  | F | F | F |
|                    | 0.4976502602429420 | 0.7520302588618719  | 0.4009335625449566  | T | T | T |
|                    | 0.6666669999999968 | 0.8333330000000032  | 0.0514190000000028  | F | F | F |
|                    | 0.6670290111238799 | 0.8329500461598300  | 0.3149755407560590  | T | T | T |
|                    | 0.5832984763700608 | 0.9167226008823022  | 0.2266970821827599  | T | T | T |
|                    | 0.7500000000000000 | 0.7500000000000000  | 0.1392870000000030  | F | F | F |
|                    | 0.9166669999999968 | 0.8333330000000032  | 0.0514190000000028  | F | F | F |
|                    | 0.9166874516789321 | 0.8331667638809535  | 0.3149436966005155  | T | T | T |
|                    | 0.8329960788949577 | 0.9166012240936467  | 0.2271975292375217  | T | T | T |
|                    | 0.2500555863526657 | 0.2499355458484303  | 0.4058362293801210  | T | T | T |
|                    | 0.7500644541515697 | 0.7499444136473343  | 0.4058362293801210  | T | T | T |
|                    | 0.0000940249985462 | 0.9999059750014538  | 0.4058556508240088  | T | T | T |
|                    | 0.5000697300020462 | 0.4999302699979538  | 0.4058477702576724  | T | T | T |
| <b>4Ag/Ni(111)</b> | 1.0000000000000000 |                     |                     |   |   |   |
|                    | 8.6224000674449712 | -4.9781450000000014 | 0.0000000000000000  |   |   |   |
|                    | 0.0000000000000000 | 9.9562900000000010  | 0.0000000000000000  |   |   |   |
|                    | 0.0000000000000000 | 0.0000000000000000  | 23.1292800000000014 |   |   |   |
|                    | Ni                 | Ag                  |                     |   |   |   |
|                    | 76                 | 4                   |                     |   |   |   |
|                    | Selective dynamics |                     |                     |   |   |   |
|                    | Direct             |                     |                     |   |   |   |
|                    | 0.0000000000000000 | 0.0000000000000000  | 0.1392870000000030  | F | F | F |
|                    | 0.1666669999999968 | 0.0833330000000032  | 0.0514190000000028  | F | F | F |
|                    | 0.1657254101754830 | 0.0809529198760757  | 0.3152600454954353  | T | T | T |
|                    | 0.0833639717310533 | 0.1666640769891288  | 0.2274980514610050  | T | T | T |
|                    | 0.2500000000000000 | 0.0000000000000000  | 0.1392870000000030  | F | F | F |
|                    | 0.2552620064426208 | 0.9913778507175763  | 0.4003911731608412  | T | T | T |

|                    |                    |                    |   |   |   |
|--------------------|--------------------|--------------------|---|---|---|
| 0.416666999999968  | 0.083333000000032  | 0.051419000000028  | F | F | F |
| 0.4164813685125281 | 0.0835378011087826 | 0.3136167208622922 | T | T | T |
| 0.3331211640129368 | 0.1668981655402035 | 0.2269765842163523 | T | T | T |
| 0.500000000000000  | 0.000000000000000  | 0.1392870000000030 | F | F | F |
| 0.5010816049841296 | 0.9989173241449834 | 0.4004323870380588 | T | T | T |
| 0.666666999999968  | 0.083333000000032  | 0.051419000000028  | F | F | F |
| 0.6676508852315379 | 0.0829570352200264 | 0.3133269014521360 | T | T | T |
| 0.5835267289436388 | 0.1665296989769800 | 0.2264166360450446 | T | T | T |
| 0.750000000000000  | 0.000000000000000  | 0.1392870000000030 | F | F | F |
| 0.7468729563804999 | 0.0062588175634559 | 0.4012695832247601 | T | T | T |
| 0.916666999999968  | 0.083333000000032  | 0.051419000000028  | F | F | F |
| 0.9185702221030638 | 0.0814297778969362 | 0.3165526214868919 | T | T | T |
| 0.8339119402335626 | 0.1660880597664374 | 0.2266540800310111 | T | T | T |
| 0.000000000000000  | 0.250000000000000  | 0.1392870000000030 | F | F | F |
| 0.9937411824365441 | 0.2531270436195001 | 0.4012695832247601 | T | T | T |
| 0.166666999999968  | 0.333333000000032  | 0.051419000000028  | F | F | F |
| 0.1669050763717124 | 0.3330681650813929 | 0.3148227526039875 | T | T | T |
| 0.0836554983214981 | 0.4163583481050779 | 0.2264004158505486 | T | T | T |
| 0.250000000000000  | 0.250000000000000  | 0.1392870000000030 | F | F | F |
| 0.416666999999968  | 0.333333000000032  | 0.051419000000028  | F | F | F |
| 0.4189781857328043 | 0.3342589350934020 | 0.3152710471668101 | T | T | T |
| 0.3333405778800085 | 0.4166346663265088 | 0.2275040475669101 | T | T | T |
| 0.500000000000000  | 0.250000000000000  | 0.1392870000000030 | F | F | F |
| 0.5086038491874589 | 0.2447106848552494 | 0.4003770014726626 | T | T | T |
| 0.666666999999968  | 0.333333000000032  | 0.051419000000028  | F | F | F |
| 0.6669126417988309 | 0.3330873582011691 | 0.3133768637039651 | T | T | T |
| 0.5832174869578921 | 0.4167825130421079 | 0.2267483762744149 | T | T | T |
| 0.750000000000000  | 0.250000000000000  | 0.1392870000000030 | F | F | F |
| 0.7511178251862418 | 0.2488821748137582 | 0.4005652671981466 | T | T | T |
| 0.916666999999968  | 0.333333000000032  | 0.051419000000028  | F | F | F |
| 0.9170429647799736 | 0.3323491147684621 | 0.3133269014521360 | T | T | T |
| 0.8334703010230200 | 0.4164732710563612 | 0.2264166360450446 | T | T | T |
| 0.000000000000000  | 0.500000000000000  | 0.1392870000000030 | F | F | F |
| 0.0010826758550166 | 0.4989183950158704 | 0.4004323870380588 | T | T | T |
| 0.166666999999968  | 0.583333000000032  | 0.051419000000028  | F | F | F |
| 0.1676205448439987 | 0.5829595000986245 | 0.3133420391651143 | T | T | T |
| 0.0835009591841640 | 0.6665277264760121 | 0.2264108766694619 | T | T | T |
| 0.250000000000000  | 0.500000000000000  | 0.1392870000000030 | F | F | F |
| 0.2468165073405899 | 0.5062319104882107 | 0.4012547332387726 | T | T | T |
| 0.416666999999968  | 0.583333000000032  | 0.051419000000028  | F | F | F |
| 0.4185702351504617 | 0.5814297648495383 | 0.3165737055792803 | T | T | T |
| 0.3339336451218031 | 0.6660663548781969 | 0.2266423972682929 | T | T | T |
| 0.500000000000000  | 0.500000000000000  | 0.1392870000000030 | F | F | F |
| 0.666666999999968  | 0.583333000000032  | 0.051419000000028  | F | F | F |
| 0.6657410649065980 | 0.5810218142671957 | 0.3152710471668101 | T | T | T |
| 0.5833653336734912 | 0.6666594221199915 | 0.2275040475669101 | T | T | T |
| 0.750000000000000  | 0.500000000000000  | 0.1392870000000030 | F | F | F |
| 0.7552893151447506 | 0.4913961508125411 | 0.4003770014726626 | T | T | T |
| 0.916666999999968  | 0.583333000000032  | 0.051419000000028  | F | F | F |
| 0.9164621988912174 | 0.5835186314874719 | 0.3136167208622922 | T | T | T |
| 0.8331008344597990 | 0.6668788359870632 | 0.2269765842163523 | T | T | T |

|                    |                    |                     |                     |   |   |   |
|--------------------|--------------------|---------------------|---------------------|---|---|---|
|                    | 0.0000000000000000 | 0.7500000000000000  | 0.1392870000000030  | F | F | F |
|                    | 0.0086221492824237 | 0.7447379935573792  | 0.4003911731608412  | T | T | T |
|                    | 0.1666669999999968 | 0.8333330000000032  | 0.0514190000000028  | F | F | F |
|                    | 0.1668769377425008 | 0.8331230622574992  | 0.3133672987402605  | T | T | T |
|                    | 0.0832143648186161 | 0.9167856351813839  | 0.2267460055752792  | T | T | T |
|                    | 0.2500000000000000 | 0.7500000000000000  | 0.1392870000000030  | F | F | F |
|                    | 0.2511334202162203 | 0.7488665797837797  | 0.4005562560541520  | T | T | T |
|                    | 0.4166669999999968 | 0.8333330000000032  | 0.0514190000000028  | F | F | F |
|                    | 0.4170404999013755 | 0.8323794551560013  | 0.3133420391651143  | T | T | T |
|                    | 0.3334722735239879 | 0.9164990408158360  | 0.2264108766694619  | T | T | T |
|                    | 0.5000000000000000 | 0.7500000000000000  | 0.1392870000000030  | F | F | F |
|                    | 0.4937680895117893 | 0.7531834926594101  | 0.4012547332387726  | T | T | T |
|                    | 0.6666669999999968 | 0.8333330000000032  | 0.0514190000000028  | F | F | F |
|                    | 0.6669318349186071 | 0.8330949236282876  | 0.3148227526039875  | T | T | T |
|                    | 0.5836416518949221 | 0.9163445016785019  | 0.2264004158505486  | T | T | T |
|                    | 0.7500000000000000 | 0.7500000000000000  | 0.1392870000000030  | F | F | F |
|                    | 0.9166669999999968 | 0.8333330000000032  | 0.0514190000000028  | F | F | F |
|                    | 0.9190470801239243 | 0.8342745898245170  | 0.3152600454954353  | T | T | T |
|                    | 0.8333359230108712 | 0.9166360282689467  | 0.2274980514610050  | T | T | T |
|                    | 0.2509326140890664 | 0.2489333726692564  | 0.4122911345382860  | T | T | T |
|                    | 0.7510666273307436 | 0.7490673859109336  | 0.4122911345382860  | T | T | T |
|                    | 0.0012489317598536 | 0.9987510682401464  | 0.4399325201293180  | T | T | T |
|                    | 0.5012360342615452 | 0.4987639657384548  | 0.4396953974474087  | T | T | T |
| <b>4Au/Ni(111)</b> | 1.0000000000000000 |                     |                     |   |   |   |
|                    | 8.6224000674449712 | -4.9781450000000014 | 0.0000000000000000  |   |   |   |
|                    | 0.0000000000000000 | 9.9562900000000010  | 0.0000000000000000  |   |   |   |
|                    | 0.0000000000000000 | 0.0000000000000000  | 23.1292800000000014 |   |   |   |
|                    | Ni Au              |                     |                     |   |   |   |
|                    | 76 4               |                     |                     |   |   |   |
|                    | Selective dynamics |                     |                     |   |   |   |
|                    | Direct             |                     |                     |   |   |   |
|                    | 0.0000000000000000 | 0.0000000000000000  | 0.1392870000000030  | F | F | F |
|                    | 0.1666669999999968 | 0.0833330000000032  | 0.0514190000000028  | F | F | F |
|                    | 0.1669048632104406 | 0.0822433391808985  | 0.3150745505088963  | T | T | T |
|                    | 0.0835156183834798 | 0.1668342502255555  | 0.2273389169732027  | T | T | T |
|                    | 0.2500000000000000 | 0.0000000000000000  | 0.1392870000000030  | F | F | F |
|                    | 0.2570170447938764 | 0.9922077854666185  | 0.4016282669515263  | T | T | T |
|                    | 0.4166669999999968 | 0.0833330000000032  | 0.0514190000000028  | F | F | F |
|                    | 0.4167285889012504 | 0.0832706003141865  | 0.3137666708655260  | T | T | T |
|                    | 0.3332579588840048 | 0.1667561626221712  | 0.2269724845206511  | T | T | T |
|                    | 0.5000000000000000 | 0.0000000000000000  | 0.1392870000000030  | F | F | F |
|                    | 0.5011812674797014 | 0.9988032074656417  | 0.4004768240507133  | T | T | T |
|                    | 0.6666669999999968 | 0.0833330000000032  | 0.0514190000000028  | F | F | F |
|                    | 0.6672674925035835 | 0.0831644178096909  | 0.3135809788441293  | T | T | T |
|                    | 0.5833841593712208 | 0.1667508691452753  | 0.2265012609921513  | T | T | T |
|                    | 0.7500000000000000 | 0.0000000000000000  | 0.1392870000000030  | F | F | F |
|                    | 0.7453038375988683 | 0.0051205220306159  | 0.4018655060472796  | T | T | T |
|                    | 0.9166669999999968 | 0.0833330000000032  | 0.0514190000000028  | F | F | F |
|                    | 0.9170235538997318 | 0.0829764461002682  | 0.3150477801780198  | T | T | T |
|                    | 0.8335009346531876 | 0.1664990653468124  | 0.2264265666793790  | T | T | T |
|                    | 0.0000000000000000 | 0.2500000000000000  | 0.1392870000000030  | F | F | F |

|                    |                    |                    |   |   |   |
|--------------------|--------------------|--------------------|---|---|---|
| 0.9948794779693841 | 0.2546961624011317 | 0.4018655060472796 | T | T | T |
| 0.1666669999999968 | 0.3333330000000032 | 0.0514190000000028 | F | F | F |
| 0.1666531940295712 | 0.3332997163982228 | 0.3146131871864668 | T | T | T |
| 0.0835135669537550 | 0.4165018525321855 | 0.2265093801078208 | T | T | T |
| 0.2500000000000000 | 0.2500000000000000 | 0.1392870000000030 | F | F | F |
| 0.4166669999999968 | 0.3333330000000032 | 0.0514190000000028 | F | F | F |
| 0.4177654556857391 | 0.3330912200704574 | 0.3150741242097652 | T | T | T |
| 0.3331825890596747 | 0.4164907659254382 | 0.2273348266002699 | T | T | T |
| 0.5000000000000000 | 0.2500000000000000 | 0.1392870000000030 | F | F | F |
| 0.5078136159930438 | 0.2429901902208016 | 0.4016279289584972 | T | T | T |
| 0.6666669999999968 | 0.3333330000000032 | 0.0514190000000028 | F | F | F |
| 0.6669441837360282 | 0.3330558162639718 | 0.3136450321804602 | T | T | T |
| 0.5832324994886093 | 0.4167675005113907 | 0.2269610595378921 | T | T | T |
| 0.7500000000000000 | 0.2500000000000000 | 0.1392870000000030 | F | F | F |
| 0.7512913648764084 | 0.2487086351235916 | 0.4005524467696517 | T | T | T |
| 0.9166669999999968 | 0.3333330000000032 | 0.0514190000000028 | F | F | F |
| 0.9168355821903091 | 0.3327325074964165 | 0.3135809788441293 | T | T | T |
| 0.8332491308547247 | 0.4166158406287792 | 0.2265012609921513 | T | T | T |
| 0.0000000000000000 | 0.5000000000000000 | 0.1392870000000030 | F | F | F |
| 0.0011967925343583 | 0.4988187325202986 | 0.4004768240507133 | T | T | T |
| 0.1666669999999968 | 0.5833330000000032 | 0.0514190000000028 | F | F | F |
| 0.1672741420044943 | 0.5831646652604618 | 0.3135923642777811 | T | T | T |
| 0.0833619012194262 | 0.6667473783060700 | 0.2265086803491130 | T | T | T |
| 0.2500000000000000 | 0.5000000000000000 | 0.1392870000000030 | F | F | F |
| 0.2453472173373896 | 0.5051337393490343 | 0.4018659331492316 | T | T | T |
| 0.4166669999999968 | 0.5833330000000032 | 0.0514190000000028 | F | F | F |
| 0.4170507258680729 | 0.5829492741319271 | 0.3150509123953000 | T | T | T |
| 0.3334810759071019 | 0.6665189240928981 | 0.2264569271644135 | T | T | T |
| 0.5000000000000000 | 0.5000000000000000 | 0.1392870000000030 | F | F | F |
| 0.6666669999999968 | 0.5833330000000032 | 0.0514190000000028 | F | F | F |
| 0.6669087799295426 | 0.5822345443142609 | 0.3150741242097652 | T | T | T |
| 0.5835092340745618 | 0.6668174109403253 | 0.2273348266002699 | T | T | T |
| 0.7500000000000000 | 0.5000000000000000 | 0.1392870000000030 | F | F | F |
| 0.7570098097791984 | 0.4921863840069562 | 0.4016279289584972 | T | T | T |
| 0.9166669999999968 | 0.5833330000000032 | 0.0514190000000028 | F | F | F |
| 0.9167293996858135 | 0.5832714110987496 | 0.3137666708655260 | T | T | T |
| 0.8332428373778313 | 0.6667420411159952 | 0.2269724845206511 | T | T | T |
| 0.0000000000000000 | 0.7500000000000000 | 0.1392870000000030 | F | F | F |
| 0.0077922145333886 | 0.7429829552061236 | 0.4016282669515263 | T | T | T |
| 0.1666669999999968 | 0.8333330000000032 | 0.0514190000000028 | F | F | F |
| 0.1669501251266894 | 0.8330498748733106 | 0.3136376915038355 | T | T | T |
| 0.0832091450480448 | 0.9167908549519552 | 0.2269333078127502 | T | T | T |
| 0.2500000000000000 | 0.7500000000000000 | 0.1392870000000030 | F | F | F |
| 0.2512914366103374 | 0.7487085633896626 | 0.4005281639275182 | T | T | T |
| 0.4166669999999968 | 0.8333330000000032 | 0.0514190000000028 | F | F | F |
| 0.4168353347395382 | 0.8327258579955057 | 0.3135923642777811 | T | T | T |
| 0.3332526216939300 | 0.9166380987805667 | 0.2265086803491130 | T | T | T |
| 0.5000000000000000 | 0.7500000000000000 | 0.1392870000000030 | F | F | F |
| 0.4948662606509657 | 0.7546527826626104 | 0.4018659331492316 | T | T | T |
| 0.6666669999999968 | 0.8333330000000032 | 0.0514190000000028 | F | F | F |
| 0.6667002836017772 | 0.8333468059704288 | 0.3146131871864668 | T | T | T |

|                    |                    |                     |                     |   |   |   |
|--------------------|--------------------|---------------------|---------------------|---|---|---|
|                    | 0.5834981474678074 | 0.9164864330462450  | 0.2265093801078208  | T | T | T |
|                    | 0.7500000000000000 | 0.7500000000000000  | 0.1392870000000030  | F | F | F |
|                    | 0.9166669999999968 | 0.8333330000000032  | 0.0514190000000028  | F | F | F |
|                    | 0.9177566608191015 | 0.8330951367895594  | 0.3150745505088963  | T | T | T |
|                    | 0.8331657497744445 | 0.9164843816165202  | 0.2273389169732027  | T | T | T |
|                    | 0.2511405465255336 | 0.2488597560481622  | 0.4162530704388914  | T | T | T |
|                    | 0.7511402439518378 | 0.7488594534744664  | 0.4162530704388914  | T | T | T |
|                    | 0.0011735553605021 | 0.9988264446394979  | 0.4211511591735402  | T | T | T |
|                    | 0.5011718573788713 | 0.4988281426211287  | 0.4211555323522447  | T | T | T |
| <b>4Ni/Cu(111)</b> | 1.0000000000000000 |                     |                     |   |   |   |
|                    | 8.8905944857135406 | -5.1329871195825199 | -0.0000000000000010 |   |   |   |
|                    | 0.0000000000000000 | 10.2659742391650006 | 0.0000000000000010  |   |   |   |
|                    | 0.0000000000000000 | 0.0000000000000000  | 23.3821328661704015 |   |   |   |
|                    | Ni                 | Cu                  |                     |   |   |   |
|                    | 4                  | 76                  |                     |   |   |   |
|                    | Selective dynamics |                     |                     |   |   |   |
|                    | Direct             |                     |                     |   |   |   |
|                    | 0.0004645857279471 | 0.9995354142720529  | 0.3796462180270765  | T | T | T |
|                    | 0.2504645857279471 | 0.2495354142720529  | 0.3796462180270765  | T | T | T |
|                    | 0.5004645857279471 | 0.4995354142720529  | 0.3796462180270765  | T | T | T |
|                    | 0.7504645857279471 | 0.7495354142720529  | 0.3796462180270765  | T | T | T |
|                    | 0.0000000000000000 | 0.0000000000000000  | 0.1155258754999977  | F | F | F |
|                    | 0.1666666667000030 | 0.083333332999970   | 0.0259047434999999  | F | F | F |
|                    | 0.1663676545796733 | 0.0836323454203267  | 0.2939784658163305  | T | T | T |
|                    | 0.0831619554158465 | 0.1668380445841535  | 0.2044464745961321  | T | T | T |
|                    | 0.2500000000000000 | 0.0000000000000000  | 0.1155258754999977  | F | F | F |
|                    | 0.2480238361591276 | 0.0019761638408724  | 0.3834443634198337  | T | T | T |
|                    | 0.4166666667000030 | 0.083333332999970   | 0.0259047434999999  | F | F | F |
|                    | 0.4163940672573290 | 0.0836059327426710  | 0.2945965615355703  | T | T | T |
|                    | 0.3332665353743067 | 0.1667334646256933  | 0.2048154381846317  | T | T | T |
|                    | 0.5000000000000000 | 0.0000000000000000  | 0.1155258754999977  | F | F | F |
|                    | 0.5000357693976980 | 0.9999642306023020  | 0.3829812488833610  | T | T | T |
|                    | 0.6666666667000030 | 0.083333332999970   | 0.0259047434999999  | F | F | F |
|                    | 0.6668758405699009 | 0.0831241594300991  | 0.2945641909867760  | T | T | T |
|                    | 0.5832364154065388 | 0.1667635845934612  | 0.2051561558820012  | T | T | T |
|                    | 0.7500000000000000 | 0.0000000000000000  | 0.1155258754999977  | F | F | F |
|                    | 0.7523635550462018 | 0.9976364449537982  | 0.3831490130339859  | T | T | T |
|                    | 0.9166666667000030 | 0.083333332999970   | 0.0259047434999999  | F | F | F |
|                    | 0.9168786523772567 | 0.0831213476227433  | 0.2939514479829128  | T | T | T |
|                    | 0.8332996115289362 | 0.1667003884710638  | 0.2051082605118495  | T | T | T |
|                    | 0.0000000000000000 | 0.2500000000000000  | 0.1155258754999977  | F | F | F |
|                    | 0.0023635550462018 | 0.2476364449537982  | 0.3831490130339859  | T | T | T |
|                    | 0.1666666667000030 | 0.333333332999970   | 0.0259047434999999  | F | F | F |
|                    | 0.1668786523772567 | 0.3331213476227433  | 0.2939514479829128  | T | T | T |
|                    | 0.0832996115289362 | 0.4167003884710638  | 0.2051082605118495  | T | T | T |
|                    | 0.2500000000000000 | 0.2500000000000000  | 0.1155258754999977  | F | F | F |
|                    | 0.4166666667000030 | 0.333333332999970   | 0.0259047434999999  | F | F | F |
|                    | 0.4163676545796733 | 0.3336323454203267  | 0.2939784658163305  | T | T | T |
|                    | 0.3331619554158465 | 0.4168380445841535  | 0.2044464745961321  | T | T | T |
|                    | 0.5000000000000000 | 0.2500000000000000  | 0.1155258754999977  | F | F | F |
|                    | 0.4980238361591276 | 0.2519761638408724  | 0.3834443634198337  | T | T | T |

|                    |                    |                     |                     |   |   |   |
|--------------------|--------------------|---------------------|---------------------|---|---|---|
|                    | 0.666666667000030  | 0.333333332999970   | 0.0259047434999999  | F | F | F |
|                    | 0.6663940672573290 | 0.3336059327426710  | 0.2945965615355703  | T | T | T |
|                    | 0.5832665353743067 | 0.4167334646256933  | 0.2048154381846317  | T | T | T |
|                    | 0.7500000000000000 | 0.2500000000000000  | 0.1155258754999977  | F | F | F |
|                    | 0.7500357693976980 | 0.2499642306023020  | 0.3829812488833610  | T | T | T |
|                    | 0.916666667000030  | 0.333333332999970   | 0.0259047434999999  | F | F | F |
|                    | 0.9168758405699009 | 0.3331241594300991  | 0.2945641909867760  | T | T | T |
|                    | 0.8332364154065388 | 0.4167635845934612  | 0.2051561558820012  | T | T | T |
|                    | 0.0000000000000000 | 0.5000000000000000  | 0.1155258754999977  | F | F | F |
|                    | 0.0000357693976980 | 0.4999642306023020  | 0.3829812488833610  | T | T | T |
|                    | 0.166666667000030  | 0.583333332999970   | 0.0259047434999999  | F | F | F |
|                    | 0.1668758405699009 | 0.5831241594300991  | 0.2945641909867760  | T | T | T |
|                    | 0.0832364154065388 | 0.6667635845934612  | 0.2051561558820012  | T | T | T |
|                    | 0.2500000000000000 | 0.5000000000000000  | 0.1155258754999977  | F | F | F |
|                    | 0.2523635550462018 | 0.4976364449537982  | 0.3831490130339859  | T | T | T |
|                    | 0.416666667000030  | 0.583333332999970   | 0.0259047434999999  | F | F | F |
|                    | 0.4168786523772567 | 0.5831213476227433  | 0.2939514479829128  | T | T | T |
|                    | 0.3332996115289362 | 0.6667003884710638  | 0.2051082605118495  | T | T | T |
|                    | 0.5000000000000000 | 0.5000000000000000  | 0.1155258754999977  | F | F | F |
|                    | 0.666666667000030  | 0.583333332999970   | 0.0259047434999999  | F | F | F |
|                    | 0.6663676545796733 | 0.5836323454203267  | 0.2939784658163305  | T | T | T |
|                    | 0.5831619554158465 | 0.6668380445841535  | 0.2044464745961321  | T | T | T |
|                    | 0.7500000000000000 | 0.5000000000000000  | 0.1155258754999977  | F | F | F |
|                    | 0.7480238361591205 | 0.5019761638408724  | 0.3834443634198337  | T | T | T |
|                    | 0.916666667000030  | 0.583333332999970   | 0.0259047434999999  | F | F | F |
|                    | 0.9163940672573290 | 0.5836059327426710  | 0.2945965615355703  | T | T | T |
|                    | 0.8332665353743067 | 0.6667334646256933  | 0.2048154381846317  | T | T | T |
|                    | 0.0000000000000000 | 0.7500000000000000  | 0.1155258754999977  | F | F | F |
|                    | 0.9980238361591276 | 0.7519761638408724  | 0.3834443634198337  | T | T | T |
|                    | 0.166666667000030  | 0.833333332999970   | 0.0259047434999999  | F | F | F |
|                    | 0.1663940672573290 | 0.8336059327426710  | 0.2945965615355703  | T | T | T |
|                    | 0.0832665353743067 | 0.9167334646256933  | 0.2048154381846317  | T | T | T |
|                    | 0.2500000000000000 | 0.7500000000000000  | 0.1155258754999977  | F | F | F |
|                    | 0.2500357693976980 | 0.7499642306023020  | 0.3829812488833610  | T | T | T |
|                    | 0.416666667000030  | 0.833333332999970   | 0.0259047434999999  | F | F | F |
|                    | 0.4168758405699009 | 0.8331241594300991  | 0.2945641909867760  | T | T | T |
|                    | 0.3332364154065388 | 0.9167635845934612  | 0.2051561558820012  | T | T | T |
|                    | 0.5000000000000000 | 0.7500000000000000  | 0.1155258754999977  | F | F | F |
|                    | 0.5023635550462018 | 0.7476364449537982  | 0.3831490130339859  | T | T | T |
|                    | 0.666666667000030  | 0.833333332999970   | 0.0259047434999999  | F | F | F |
|                    | 0.6668786523772567 | 0.8331213476227433  | 0.2939514479829128  | T | T | T |
|                    | 0.5832996115289362 | 0.9167003884710638  | 0.2051082605118495  | T | T | T |
|                    | 0.7500000000000000 | 0.7500000000000000  | 0.1155258754999977  | F | F | F |
|                    | 0.916666667000030  | 0.833333332999970   | 0.0259047434999999  | F | F | F |
|                    | 0.9163676545796733 | 0.8336323454203267  | 0.2939784658163305  | T | T | T |
|                    | 0.8331619554158465 | 0.9168380445841535  | 0.2044464745961321  | T | T | T |
| <b>4Pd/Cu(111)</b> | 1.0000000000000000 |                     |                     |   |   |   |
|                    | 8.8905944857135406 | -5.1329871195825199 | -0.0000000000000010 |   |   |   |
|                    | 0.0000000000000000 | 10.2659742391650006 | 0.0000000000000010  |   |   |   |
|                    | 0.0000000000000000 | 0.0000000000000000  | 23.3821328661704015 |   |   |   |
|                    | Pd                 | Cu                  |                     |   |   |   |

## Selective dynamics

## Direct

|                    |                    |                    |   |   |   |
|--------------------|--------------------|--------------------|---|---|---|
| 0.0002070325746075 | 0.9997929674253925 | 0.3875316522478442 | T | T | T |
| 0.2502070325746075 | 0.2497929674253925 | 0.3875316522478442 | T | T | T |
| 0.5002070325746075 | 0.4997929674253925 | 0.3875316522478442 | T | T | T |
| 0.7502070325746075 | 0.7497929674253925 | 0.3875316522478442 | T | T | T |
| 0.0000000000000000 | 0.0000000000000000 | 0.1155258754999977 | F | F | F |
| 0.1666666667000030 | 0.083333332999970  | 0.0259047434999999 | F | F | F |
| 0.1668678595280042 | 0.0831321404719958 | 0.2942521739017181 | T | T | T |
| 0.0831830103186704 | 0.1668169896813225 | 0.2048498335366773 | T | T | T |
| 0.2500000000000000 | 0.0000000000000000 | 0.1155258754999977 | F | F | F |
| 0.2533100657368834 | 0.9966899342631166 | 0.3840136037513702 | T | T | T |
| 0.4166666667000030 | 0.083333332999970  | 0.0259047434999999 | F | F | F |
| 0.4165796440762080 | 0.0834203559237920 | 0.2940518386311552 | T | T | T |
| 0.3331476742860318 | 0.1668523257139682 | 0.2049408729932836 | T | T | T |
| 0.5000000000000000 | 0.0000000000000000 | 0.1155258754999977 | F | F | F |
| 0.5000149864186696 | 0.9999850135813304 | 0.3827545867510906 | T | T | T |
| 0.6666666667000030 | 0.083333332999970  | 0.0259047434999999 | F | F | F |
| 0.6666236419075204 | 0.0833763580924796 | 0.2939705982810281 | T | T | T |
| 0.5832721424322571 | 0.1667278575677429 | 0.2048454248633291 | T | T | T |
| 0.7500000000000000 | 0.0000000000000000 | 0.1155258754999977 | F | F | F |
| 0.7468573351808487 | 0.0031426648191513 | 0.3841283353929512 | T | T | T |
| 0.9166666667000030 | 0.083333332999970  | 0.0259047434999999 | F | F | F |
| 0.9164366206325028 | 0.0835633793674972 | 0.2945133705127816 | T | T | T |
| 0.8335574644153780 | 0.1664425355846220 | 0.2050725407500948 | T | T | T |
| 0.0000000000000000 | 0.2500000000000000 | 0.1155258754999977 | F | F | F |
| 0.9968573351808487 | 0.2531426648191513 | 0.3841283353929512 | T | T | T |
| 0.1666666667000030 | 0.333333332999970  | 0.0259047434999999 | F | F | F |
| 0.1664366206325028 | 0.3335633793674972 | 0.2945133705127816 | T | T | T |
| 0.0835574644153780 | 0.4164425355846220 | 0.2050725407500948 | T | T | T |
| 0.2500000000000000 | 0.2500000000000000 | 0.1155258754999977 | F | F | F |
| 0.4166666667000030 | 0.333333332999970  | 0.0259047434999999 | F | F | F |
| 0.4168678595280042 | 0.3331321404719958 | 0.2942521739017181 | T | T | T |
| 0.3331830103186704 | 0.4168169896813296 | 0.2048498335366773 | T | T | T |
| 0.5000000000000000 | 0.2500000000000000 | 0.1155258754999977 | F | F | F |
| 0.5033100657368834 | 0.2466899342631166 | 0.3840136037513702 | T | T | T |
| 0.6666666667000030 | 0.333333332999970  | 0.0259047434999999 | F | F | F |
| 0.6665796440762080 | 0.3334203559237920 | 0.2940518386311552 | T | T | T |
| 0.5831476742860318 | 0.4168523257139682 | 0.2049408729932836 | T | T | T |
| 0.7500000000000000 | 0.2500000000000000 | 0.1155258754999977 | F | F | F |
| 0.7500149864186696 | 0.2499850135813304 | 0.3827545867510906 | T | T | T |
| 0.9166666667000030 | 0.333333332999970  | 0.0259047434999999 | F | F | F |
| 0.9166236419075204 | 0.3333763580924796 | 0.2939705982810281 | T | T | T |
| 0.8332721424322571 | 0.4167278575677429 | 0.2048454248633291 | T | T | T |
| 0.0000000000000000 | 0.5000000000000000 | 0.1155258754999977 | F | F | F |
| 0.0000149864186696 | 0.4999850135813304 | 0.3827545867510906 | T | T | T |
| 0.1666666667000030 | 0.583333332999970  | 0.0259047434999999 | F | F | F |
| 0.1666236419075204 | 0.5833763580924796 | 0.2939705982810281 | T | T | T |
| 0.0832721424322571 | 0.6667278575677429 | 0.2048454248633291 | T | T | T |
| 0.2500000000000000 | 0.5000000000000000 | 0.1155258754999977 | F | F | F |



|                    |                    |                     |                     |   |   |   |
|--------------------|--------------------|---------------------|---------------------|---|---|---|
|                    | 0.2468573351808487 | 0.5031426648191513  | 0.3841283353929512  | T | T | T |
|                    | 0.4166666667000030 | 0.5833333332999970  | 0.0259047434999999  | F | F | F |
|                    | 0.4164366206325028 | 0.5835633793674972  | 0.2945133705127816  | T | T | T |
|                    | 0.3335574644153780 | 0.6664425355846220  | 0.2050725407500948  | T | T | T |
|                    | 0.5000000000000000 | 0.5000000000000000  | 0.1155258754999977  | F | F | F |
|                    | 0.6666666667000030 | 0.5833333332999970  | 0.0259047434999999  | F | F | F |
|                    | 0.6668678595280042 | 0.5831321404719958  | 0.2942521739017181  | T | T | T |
|                    | 0.5831830103186775 | 0.6668169896813225  | 0.2048498335366773  | T | T | T |
|                    | 0.7500000000000000 | 0.5000000000000000  | 0.1155258754999977  | F | F | F |
|                    | 0.7533100657368834 | 0.4966899342631166  | 0.3840136037513702  | T | T | T |
|                    | 0.9166666667000030 | 0.5833333332999970  | 0.0259047434999999  | F | F | F |
|                    | 0.9165796440762080 | 0.5834203559237920  | 0.2940518386311552  | T | T | T |
|                    | 0.8331476742860318 | 0.6668523257139682  | 0.2049408729932836  | T | T | T |
|                    | 0.0000000000000000 | 0.7500000000000000  | 0.1155258754999977  | F | F | F |
|                    | 0.0033100657368834 | 0.7466899342631166  | 0.3840136037513702  | T | T | T |
|                    | 0.1666666667000030 | 0.8333333332999970  | 0.0259047434999999  | F | F | F |
|                    | 0.1665796440762080 | 0.8334203559237920  | 0.2940518386311552  | T | T | T |
|                    | 0.0831476742860318 | 0.9168523257139682  | 0.2049408729932836  | T | T | T |
|                    | 0.2500000000000000 | 0.7500000000000000  | 0.1155258754999977  | F | F | F |
|                    | 0.2500149864186696 | 0.7499850135813304  | 0.3827545867510906  | T | T | T |
|                    | 0.4166666667000030 | 0.8333333332999970  | 0.0259047434999999  | F | F | F |
|                    | 0.4166236419075204 | 0.8333763580924796  | 0.2939705982810281  | T | T | T |
|                    | 0.3332721424322571 | 0.9167278575677429  | 0.2048454248633291  | T | T | T |
|                    | 0.5000000000000000 | 0.7500000000000000  | 0.1155258754999977  | F | F | F |
|                    | 0.4968573351808487 | 0.7531426648191513  | 0.3841283353929512  | T | T | T |
|                    | 0.6666666667000030 | 0.8333333332999970  | 0.0259047434999999  | F | F | F |
|                    | 0.6664366206325028 | 0.8335633793674972  | 0.2945133705127816  | T | T | T |
|                    | 0.5835574644153780 | 0.9164425355846220  | 0.2050725407500948  | T | T | T |
|                    | 0.7500000000000000 | 0.7500000000000000  | 0.1155258754999977  | F | F | F |
|                    | 0.9166666667000030 | 0.8333333332999970  | 0.0259047434999999  | F | F | F |
|                    | 0.9168678595280042 | 0.8331321404719958  | 0.2942521739017181  | T | T | T |
|                    | 0.8331830103186775 | 0.9168169896813225  | 0.2048498335366773  | T | T | T |
| <b>4Pt/Cu(111)</b> | 1.0000000000000000 |                     |                     |   |   |   |
|                    | 8.8905944857135406 | -5.1329871195825199 | -0.0000000000000010 |   |   |   |
|                    | 0.0000000000000000 | 10.2659742391650006 | 0.0000000000000010  |   |   |   |
|                    | 0.0000000000000000 | 0.0000000000000000  | 23.3821328661704015 |   |   |   |
|                    | Pt                 | Cu                  |                     |   |   |   |
|                    | 4                  | 76                  |                     |   |   |   |
|                    | Selective dynamics |                     |                     |   |   |   |
|                    | Direct             |                     |                     |   |   |   |
|                    | 0.0000225041513957 | 0.9999774958486043  | 0.3864342135986405  | T | T | T |
|                    | 0.2500225041513957 | 0.2499774958486043  | 0.3864342135986405  | T | T | T |
|                    | 0.5000225041513957 | 0.4999774958486043  | 0.3864342135986405  | T | T | T |
|                    | 0.7500225041513957 | 0.7499774958486043  | 0.3864342135986405  | T | T | T |
|                    | 0.0000000000000000 | 0.0000000000000000  | 0.1155258754999977  | F | F | F |
|                    | 0.1666666667000030 | 0.0833333332999970  | 0.0259047434999999  | F | F | F |
|                    | 0.1672008876086011 | 0.0827991123913989  | 0.2935327648435191  | T | T | T |
|                    | 0.0831882399830945 | 0.1668117600169055  | 0.2045786274443060  | T | T | T |
|                    | 0.2500000000000000 | 0.0000000000000000  | 0.1155258754999977  | F | F | F |
|                    | 0.2525384034348193 | 0.9974615965651807  | 0.3852451994304644  | T | T | T |
|                    | 0.4166666667000030 | 0.0833333332999970  | 0.0259047434999999  | F | F | F |

|                    |                    |                    |   |   |   |
|--------------------|--------------------|--------------------|---|---|---|
| 0.4169399312630446 | 0.0830600687369554 | 0.2943595467013154 | T | T | T |
| 0.3333493063726749 | 0.1666506936273251 | 0.2048510746785084 | T | T | T |
| 0.5000000000000000 | 0.0000000000000000 | 0.1155258754999977 | F | F | F |
| 0.4999081136270718 | 0.0000918863729282 | 0.3829471490224208 | T | T | T |
| 0.6666666667000030 | 0.083333332999970  | 0.0259047434999999 | F | F | F |
| 0.6667445100230651 | 0.0832554899769278 | 0.2945084884830891 | T | T | T |
| 0.5834093468317363 | 0.1665906531682637 | 0.2050298626573337 | T | T | T |
| 0.7500000000000000 | 0.0000000000000000 | 0.1155258754999977 | F | F | F |
| 0.7473533643276582 | 0.0026466356723418 | 0.3852627328984681 | T | T | T |
| 0.9166666667000030 | 0.083333332999970  | 0.0259047434999999 | F | F | F |
| 0.9157354707709402 | 0.0842645292290598 | 0.2938471574666082 | T | T | T |
| 0.8334832746064080 | 0.1665167253935920 | 0.2051638597581444 | T | T | T |
| 0.0000000000000000 | 0.2500000000000000 | 0.1155258754999977 | F | F | F |
| 0.9973533643276582 | 0.2526466356723418 | 0.3852627328984681 | T | T | T |
| 0.1666666667000030 | 0.333333332999970  | 0.0259047434999999 | F | F | F |
| 0.1657354707709402 | 0.3342645292290598 | 0.2938471574666082 | T | T | T |
| 0.0834832746064080 | 0.4165167253935920 | 0.2051638597581444 | T | T | T |
| 0.2500000000000000 | 0.2500000000000000 | 0.1155258754999977 | F | F | F |
| 0.4166666667000030 | 0.333333332999970  | 0.0259047434999999 | F | F | F |
| 0.4172008876086011 | 0.3327991123913989 | 0.2935327648435191 | T | T | T |
| 0.3331882399830945 | 0.4168117600169055 | 0.2045786274443060 | T | T | T |
| 0.5000000000000000 | 0.2500000000000000 | 0.1155258754999977 | F | F | F |
| 0.5025384034348193 | 0.2474615965651807 | 0.3852451994304644 | T | T | T |
| 0.6666666667000030 | 0.333333332999970  | 0.0259047434999999 | F | F | F |
| 0.6669399312630446 | 0.3330600687369554 | 0.2943595467013154 | T | T | T |
| 0.5833493063726749 | 0.4166506936273251 | 0.2048510746785084 | T | T | T |
| 0.7500000000000000 | 0.2500000000000000 | 0.1155258754999977 | F | F | F |
| 0.7499081136270718 | 0.2500918863729282 | 0.3829471490224208 | T | T | T |
| 0.9166666667000030 | 0.333333332999970  | 0.0259047434999999 | F | F | F |
| 0.9167445100230651 | 0.3332554899769278 | 0.2945084884830891 | T | T | T |
| 0.8334093468317363 | 0.4165906531682637 | 0.2050298626573337 | T | T | T |
| 0.0000000000000000 | 0.5000000000000000 | 0.1155258754999977 | F | F | F |
| 0.9999081136270718 | 0.5000918863729282 | 0.3829471490224208 | T | T | T |
| 0.1666666667000030 | 0.583333332999970  | 0.0259047434999999 | F | F | F |
| 0.1667445100230722 | 0.5832554899769349 | 0.2945084884830891 | T | T | T |
| 0.0834093468317363 | 0.6665906531682637 | 0.2050298626573337 | T | T | T |
| 0.2500000000000000 | 0.5000000000000000 | 0.1155258754999977 | F | F | F |
| 0.2473533643276582 | 0.5026466356723418 | 0.3852627328984681 | T | T | T |
| 0.4166666667000030 | 0.583333332999970  | 0.0259047434999999 | F | F | F |
| 0.4157354707709402 | 0.5842645292290598 | 0.2938471574666082 | T | T | T |
| 0.3334832746064080 | 0.6665167253935920 | 0.2051638597581444 | T | T | T |
| 0.5000000000000000 | 0.5000000000000000 | 0.1155258754999977 | F | F | F |
| 0.6666666667000030 | 0.583333332999970  | 0.0259047434999999 | F | F | F |
| 0.6672008876086011 | 0.5827991123913989 | 0.2935327648435191 | T | T | T |
| 0.5831882399830945 | 0.6668117600169055 | 0.2045786274443060 | T | T | T |
| 0.7500000000000000 | 0.5000000000000000 | 0.1155258754999977 | F | F | F |
| 0.7525384034348193 | 0.4974615965651807 | 0.3852451994304644 | T | T | T |
| 0.9166666667000030 | 0.583333332999970  | 0.0259047434999999 | F | F | F |
| 0.9169399312630446 | 0.5830600687369554 | 0.2943595467013154 | T | T | T |
| 0.8333493063726749 | 0.6666506936273251 | 0.2048510746785084 | T | T | T |
| 0.0000000000000000 | 0.7500000000000000 | 0.1155258754999977 | F | F | F |

|                    |                    |                    |   |   |   |
|--------------------|--------------------|--------------------|---|---|---|
| 0.0025384034348193 | 0.7474615965651807 | 0.3852451994304644 | T | T | T |
| 0.1666666667000030 | 0.8333333332999970 | 0.0259047434999999 | F | F | F |
| 0.1669399312630446 | 0.8330600687369554 | 0.2943595467013154 | T | T | T |
| 0.0833493063726749 | 0.9166506936273251 | 0.2048510746785084 | T | T | T |
| 0.2500000000000000 | 0.7500000000000000 | 0.1155258754999977 | F | F | F |
| 0.2499081136270718 | 0.7500918863729282 | 0.3829471490224208 | T | T | T |
| 0.4166666667000030 | 0.8333333332999970 | 0.0259047434999999 | F | F | F |
| 0.4167445100230722 | 0.8332554899769349 | 0.2945084884830891 | T | T | T |
| 0.3334093468317363 | 0.9165906531682637 | 0.2050298626573337 | T | T | T |
| 0.5000000000000000 | 0.7500000000000000 | 0.1155258754999977 | F | F | F |
| 0.4973533643276582 | 0.7526466356723418 | 0.3852627328984681 | T | T | T |
| 0.6666666667000030 | 0.8333333332999970 | 0.0259047434999999 | F | F | F |
| 0.6657354707709402 | 0.8342645292290598 | 0.2938471574666082 | T | T | T |
| 0.5834832746064080 | 0.9165167253935920 | 0.2051638597581444 | T | T | T |
| 0.7500000000000000 | 0.7500000000000000 | 0.1155258754999977 | F | F | F |
| 0.9166666667000030 | 0.8333333332999970 | 0.0259047434999999 | F | F | F |
| 0.9172008876086011 | 0.8327991123913989 | 0.2935327648435191 | T | T | T |
| 0.8331882399830945 | 0.9168117600169055 | 0.2045786274443060 | T | T | T |

(5) CO on Ni(111)

|                    |                    |                     |                     |   |   |
|--------------------|--------------------|---------------------|---------------------|---|---|
| H site             | 1.0000000000000000 |                     |                     |   |   |
|                    | 8.6223998537762103 | -4.9781448766382903 | 0.0000000000000000  |   |   |
|                    | 0.0000000000000000 | 9.9562897532765700  | 0.0000000000000000  |   |   |
|                    | 0.0000000000000000 | 0.0000000000000000  | 23.1292765422759992 |   |   |
| Ni                 | C                  | O                   |                     |   |   |
| 80                 | 1                  | 1                   |                     |   |   |
| Selective dynamics |                    |                     |                     |   |   |
| Direct             |                    |                     |                     |   |   |
| 0.0000000000000000 | 0.0000000000000000 | 0.1392871528000015  | F                   | F | F |
| 0.0003085258439878 | 0.0003040982147022 | 0.4011839662790347  | T                   | T | T |
| 0.1666666667000030 | 0.0833333332999970 | 0.0514193316000018  | F                   | F | F |
| 0.1674603584114005 | 0.0845898317215415 | 0.3148000695601521  | T                   | T | T |
| 0.0836658823950914 | 0.1667017002843181 | 0.2269004930242483  | T                   | T | T |
| 0.2500000000000000 | 0.0000000000000000 | 0.1392871528000015  | F                   | F | F |
| 0.2501047281781654 | 0.0001588527367800 | 0.4010587874785840  | T                   | T | T |
| 0.4166666667000030 | 0.0833333332999970 | 0.0514193316000018  | F                   | F | F |
| 0.4163498069604268 | 0.0836332980360884 | 0.3144068005415658  | T                   | T | T |
| 0.3332990342168900 | 0.1666375055099730 | 0.2268655379660180  | T                   | T | T |
| 0.5000000000000000 | 0.0000000000000000 | 0.1392871528000015  | F                   | F | F |
| 0.5000838928007141 | 0.0002496056046575 | 0.4011877634801267  | T                   | T | T |
| 0.6666666667000030 | 0.0833333332999970 | 0.0514193316000018  | F                   | F | F |
| 0.6671070023514216 | 0.0837039925029889 | 0.3144622347427874  | T                   | T | T |
| 0.5835160186959855 | 0.1669441994056080 | 0.2268486433173246  | T                   | T | T |
| 0.7500000000000000 | 0.0000000000000000 | 0.1392871528000015  | F                   | F | F |
| 0.7501782624379185 | 0.0000472374519430 | 0.4011030594439894  | T                   | T | T |
| 0.9166666667000030 | 0.0833333332999970 | 0.0514193316000018  | F                   | F | F |
| 0.9172256182297372 | 0.0836984878767860 | 0.3144586893879229  | T                   | T | T |
| 0.8334708326497329 | 0.1667638771358290 | 0.2268279360324035  | T                   | T | T |
| 0.0000000000000000 | 0.2500000000000000 | 0.1392871528000015  | F                   | F | F |
| 0.9969158567066817 | 0.2485886377841611 | 0.4008123296282297  | T                   | T | T |
| 0.1666666667000030 | 0.3333333332999970 | 0.0514193316000018  | F                   | F | F |
| 0.1670715828877576 | 0.3335472144046744 | 0.3144903906775910  | T                   | T | T |

|                    |                    |                    |   |   |   |
|--------------------|--------------------|--------------------|---|---|---|
| 0.0836560320118300 | 0.4169707119587311 | 0.2269069511343460 | T | T | T |
| 0.2500000000000000 | 0.2500000000000000 | 0.1392871528000015 | F | F | F |
| 0.2500891426733121 | 0.2502403640731389 | 0.4044009524881065 | T | T | T |
| 0.4166666667000030 | 0.3333333332999970 | 0.0514193316000018 | F | F | F |
| 0.4166031982747523 | 0.3334870136884074 | 0.3146025014355674 | T | T | T |
| 0.3334173298604406 | 0.4167248993743195 | 0.2270067468073984 | T | T | T |
| 0.5000000000000000 | 0.2500000000000000 | 0.1392871528000015 | F | F | F |
| 0.5018710703759232 | 0.2486990079390022 | 0.4007935767436281 | T | T | T |
| 0.6666666667000030 | 0.3333333332999970 | 0.0514193316000018 | F | F | F |
| 0.6667864241619932 | 0.3336952584265704 | 0.3142878068844195 | T | T | T |
| 0.5838253421920376 | 0.4170204755990252 | 0.2269445039066254 | T | T | T |
| 0.7500000000000000 | 0.2500000000000000 | 0.1392871528000015 | F | F | F |
| 0.7503582444787096 | 0.2504908299279875 | 0.4011243464029333 | T | T | T |
| 0.9166666667000030 | 0.3333333332999970 | 0.0514193316000018 | F | F | F |
| 0.9172553405964019 | 0.3336639234593171 | 0.3144502288700969 | T | T | T |
| 0.8334992902327516 | 0.4168530898691774 | 0.2268821689898793 | T | T | T |
| 0.0000000000000000 | 0.5000000000000000 | 0.1392871528000015 | F | F | F |
| 0.0003911832245259 | 0.5003086744685313 | 0.4011874604265657 | T | T | T |
| 0.1666666667000030 | 0.5833333332999970 | 0.0514193316000018 | F | F | F |
| 0.1674691741437096 | 0.5829417770512340 | 0.3148187458952791 | T | T | T |
| 0.0832743235427313 | 0.6670847063407759 | 0.2268094336357513 | T | T | T |
| 0.2500000000000000 | 0.5000000000000000 | 0.1392871528000015 | F | F | F |
| 0.2501633355287233 | 0.5001371832390251 | 0.4044266384478780 | T | T | T |
| 0.4166666667000030 | 0.5833333332999970 | 0.0514193316000018 | F | F | F |
| 0.4165913247070453 | 0.5831973399071910 | 0.3145845249715361 | T | T | T |
| 0.3332815522237855 | 0.6666631281226825 | 0.2268752063739642 | T | T | T |
| 0.5000000000000000 | 0.5000000000000000 | 0.1392871528000015 | F | F | F |
| 0.5000886978065828 | 0.5002926484867891 | 0.4044041825565597 | T | T | T |
| 0.6666666667000030 | 0.5833333332999970 | 0.0514193316000018 | F | F | F |
| 0.6660612953937016 | 0.5830895083641000 | 0.3149330665608447 | T | T | T |
| 0.5838306558886207 | 0.6668492010929430 | 0.2269510684985122 | T | T | T |
| 0.7500000000000000 | 0.5000000000000000 | 0.1392871528000015 | F | F | F |
| 0.7500606998480892 | 0.5001130474256892 | 0.4010922728997549 | T | T | T |
| 0.9166666667000030 | 0.5833333332999970 | 0.0514193316000018 | F | F | F |
| 0.9168662624202548 | 0.5836673852636093 | 0.3145999197949620 | T | T | T |
| 0.8338351572006849 | 0.6669437632047606 | 0.2268015960475475 | T | T | T |
| 0.0000000000000000 | 0.7500000000000000 | 0.1392871528000015 | F | F | F |
| 0.0001498022764466 | 0.7501595603116942 | 0.4011324045014079 | T | T | T |
| 0.1666666667000030 | 0.8333333332999970 | 0.0514193316000018 | F | F | F |
| 0.1667019791463426 | 0.8333644186525409 | 0.3144720298269676 | T | T | T |
| 0.0832610657389435 | 0.9161988466421127 | 0.2268056423237709 | T | T | T |
| 0.2500000000000000 | 0.7500000000000000 | 0.1392871528000015 | F | F | F |
| 0.2501277424068957 | 0.7501080400134467 | 0.4010749940447151 | T | T | T |
| 0.4166666667000030 | 0.8333333332999970 | 0.0514193316000018 | F | F | F |
| 0.4163257281287752 | 0.8328528331433516 | 0.3144054880915002 | T | T | T |
| 0.3332610492505905 | 0.9166608637845615 | 0.2268747910006475 | T | T | T |
| 0.5000000000000000 | 0.7500000000000000 | 0.1392871528000015 | F | F | F |
| 0.5018678300199161 | 0.7534611492127687 | 0.4007682631261614 | T | T | T |
| 0.6666666667000030 | 0.8333333332999970 | 0.0514193316000018 | F | F | F |
| 0.6667142452058075 | 0.8332644500590823 | 0.3142902681954497 | T | T | T |
| 0.5835232673823576 | 0.9167102497831505 | 0.2268453090877786 | T | T | T |

|        |                     |                     |                     |   |   |   |
|--------|---------------------|---------------------|---------------------|---|---|---|
|        | 0.7500000000000000  | 0.7500000000000000  | 0.1392871528000015  | F | F | F |
|        | 0.7500973933493090  | 0.7501109474478381  | 0.4010724015497569  | T | T | T |
|        | 0.9166666667000030  | 0.833333332999970   | 0.0514193316000018  | F | F | F |
|        | 0.9167822923170652  | 0.8333852124735946  | 0.3145894883794225  | T | T | T |
|        | 0.8334540553193198  | 0.9167163693301127  | 0.2268761463934017  | T | T | T |
|        | 0.3336525155812761  | 0.4169127914702696  | 0.4612205599421416  | T | T | T |
|        | 0.3338883481720632  | 0.4170057114465083  | 0.5129048405136966  | T | T | T |
| B site | 1.0000000000000000  |                     |                     |   |   |   |
|        | 8.6224000674449712  | -4.9781450000000014 | 0.0000000000000000  |   |   |   |
|        | 0.0000000000000000  | 9.9562900000000010  | 0.0000000000000000  |   |   |   |
|        | 0.0000000000000000  | 0.0000000000000000  | 23.1292800000000014 |   |   |   |
|        | Ni                  | C                   | O                   |   |   |   |
|        | 80                  | 1                   | 1                   |   |   |   |
|        | Selective dynamics  |                     |                     |   |   |   |
|        | Direct              |                     |                     |   |   |   |
|        | 0.0000000000000000  | 0.0000000000000000  | 0.1392870000000030  | F | F | F |
|        | -0.0001649196693644 | 0.0001621278942759  | 0.4012251582437920  | T | T | T |
|        | 0.1666669999999968  | 0.0833330000000032  | 0.0514190000000028  | F | F | F |
|        | 0.1673404484707858  | 0.0843874733646996  | 0.3149176357687001  | T | T | T |
|        | 0.0838402547856818  | 0.1669521308723550  | 0.2270357677724400  | T | T | T |
|        | 0.2500000000000000  | 0.0000000000000000  | 0.1392870000000030  | F | F | F |
|        | 0.2490694491419920  | -0.0016871301785902 | 0.4010816073588300  | T | T | T |
|        | 0.4166669999999968  | 0.0833330000000032  | 0.0514190000000028  | F | F | F |
|        | 0.4165699335920648  | 0.0838939028201064  | 0.3146838286113933  | T | T | T |
|        | 0.3331918487815049  | 0.1664376421753893  | 0.2268347871366264  | T | T | T |
|        | 0.5000000000000000  | 0.0000000000000000  | 0.1392870000000030  | F | F | F |
|        | 0.4999680263615886  | 0.0000429938304666  | 0.4013497397633756  | T | T | T |
|        | 0.6666669999999968  | 0.0833330000000032  | 0.0514190000000028  | F | F | F |
|        | 0.6668612523206106  | 0.0836248403033710  | 0.3146272449857651  | T | T | T |
|        | 0.5835113805990711  | 0.1670027848397977  | 0.2269767791128453  | T | T | T |
|        | 0.7500000000000000  | 0.0000000000000000  | 0.1392870000000030  | F | F | F |
|        | 0.7499739808133682  | -0.0000549391416629 | 0.4011838918813284  | T | T | T |
|        | 0.9166669999999968  | 0.0833330000000032  | 0.0514190000000028  | F | F | F |
|        | 0.9171490864671120  | 0.0837653534575366  | 0.3145470313724874  | T | T | T |
|        | 0.8334288465175131  | 0.1667300669947963  | 0.2268768878108280  | T | T | T |
|        | 0.0000000000000000  | 0.2500000000000000  | 0.1392870000000030  | F | F | F |
|        | -0.0016621877883438 | 0.2492779900977925  | 0.4010915467116627  | T | T | T |
|        | 0.1666669999999968  | 0.3333330000000032  | 0.0514190000000028  | F | F | F |
|        | 0.1671939105972299  | 0.3333220415430207  | 0.3147205812349059  | T | T | T |
|        | 0.0833531083916001  | 0.4169126958684942  | 0.2267927698556303  | T | T | T |
|        | 0.2500000000000000  | 0.2500000000000000  | 0.1392870000000030  | F | F | F |
|        | 0.2500715360973304  | 0.2500344181121359  | 0.4044605350512065  | T | T | T |
|        | 0.4166669999999968  | 0.3333330000000032  | 0.0514190000000028  | F | F | F |
|        | 0.4165827722852398  | 0.3330336707240129  | 0.3141438011486002  | T | T | T |
|        | 0.3334020632042214  | 0.4168089472279294  | 0.2270047412928984  | T | T | T |
|        | 0.5000000000000000  | 0.2500000000000000  | 0.1392870000000030  | F | F | F |
|        | 0.5011936260121084  | 0.2487027162997131  | 0.4018864215455276  | T | T | T |
|        | 0.6666669999999968  | 0.3333330000000032  | 0.0514190000000028  | F | F | F |
|        | 0.6664746175768110  | 0.3334295476202354  | 0.3147770311234944  | T | T | T |
|        | 0.5841572329046438  | 0.4171487995063166  | 0.2269889816250653  | T | T | T |
|        | 0.7500000000000000  | 0.2500000000000000  | 0.1392870000000030  | F | F | F |

|         |                     |                     |                     |   |   |   |
|---------|---------------------|---------------------|---------------------|---|---|---|
|         | 0.7499907548738539  | 0.2499735606561722  | 0.4012701149126481  | T | T | T |
|         | 0.9166669999999968  | 0.3333330000000032  | 0.0514190000000028  | F | F | F |
|         | 0.9171204609798153  | 0.3334195691934350  | 0.3146107445919354  | T | T | T |
|         | 0.8334618033265827  | 0.4167843631681281  | 0.2269857919675245  | T | T | T |
|         | 0.0000000000000000  | 0.5000000000000000  | 0.1392870000000030  | F | F | F |
|         | -0.0000850965217380 | 0.5000523826187668  | 0.4014644374542776  | T | T | T |
|         | 0.1666669999999968  | 0.5833330000000032  | 0.0514190000000028  | F | F | F |
|         | 0.1674167901779143  | 0.5828546073106939  | 0.3147828150398440  | T | T | T |
|         | 0.0838261635824130  | 0.6669910332269209  | 0.2271982846496779  | T | T | T |
|         | 0.2500000000000000  | 0.5000000000000000  | 0.1392870000000030  | F | F | F |
|         | 0.2485895222525563  | 0.5013091771851121  | 0.4019499798907525  | T | T | T |
|         | 0.4166669999999968  | 0.5833330000000032  | 0.0514190000000028  | F | F | F |
|         | 0.4168314422411798  | 0.5829166076577693  | 0.3147668072817855  | T | T | T |
|         | 0.3333907175676010  | 0.6667894417382684  | 0.2267457019395617  | T | T | T |
|         | 0.5000000000000000  | 0.5000000000000000  | 0.1392870000000030  | F | F | F |
|         | 0.4994220580369594  | 0.4993767640990139  | 0.4047282132154806  | T | T | T |
|         | 0.6666669999999968  | 0.5833330000000032  | 0.0514190000000028  | F | F | F |
|         | 0.6656377148558889  | 0.5827179869684743  | 0.3150277332620540  | T | T | T |
|         | 0.5837655229112975  | 0.6668641971805643  | 0.2270488978570055  | T | T | T |
|         | 0.7500000000000000  | 0.5000000000000000  | 0.1392870000000030  | F | F | F |
|         | 0.7515378210246895  | 0.5007345485160259  | 0.4011227386869406  | T | T | T |
|         | 0.9166669999999968  | 0.5833330000000032  | 0.0514190000000028  | F | F | F |
|         | 0.9163808835009611  | 0.5834382230264296  | 0.3146427998865845  | T | T | T |
|         | 0.8341103272646558  | 0.6671044597078105  | 0.2267634233598131  | T | T | T |
|         | 0.0000000000000000  | 0.7500000000000000  | 0.1392870000000030  | F | F | F |
|         | -0.0003744693624817 | 0.7500717500440893  | 0.4013147445739175  | T | T | T |
|         | 0.1666669999999968  | 0.8333330000000032  | 0.0514190000000028  | F | F | F |
|         | 0.1666730085961786  | 0.8335488210655522  | 0.3146848688918903  | T | T | T |
|         | 0.0831704242155864  | 0.9160687163450887  | 0.2267985619508648  | T | T | T |
|         | 0.2500000000000000  | 0.7500000000000000  | 0.1392870000000030  | F | F | F |
|         | 0.2499505203274082  | 0.7500784750839198  | 0.4012603289783728  | T | T | T |
|         | 0.4166669999999968  | 0.8333330000000032  | 0.0514190000000028  | F | F | F |
|         | 0.4164475471139457  | 0.8329047990191540  | 0.3145132944934341  | T | T | T |
|         | 0.3332795020607289  | 0.9166852510557164  | 0.2269715410581690  | T | T | T |
|         | 0.5000000000000000  | 0.7500000000000000  | 0.1392870000000030  | F | F | F |
|         | 0.5004812772696663  | 0.7516501354495397  | 0.4010391331015508  | T | T | T |
|         | 0.6666669999999968  | 0.8333330000000032  | 0.0514190000000028  | F | F | F |
|         | 0.6666409454215991  | 0.8332276318127262  | 0.3144566461358603  | T | T | T |
|         | 0.5834880647462386  | 0.9167492288837376  | 0.2269002448959374  | T | T | T |
|         | 0.7500000000000000  | 0.7500000000000000  | 0.1392870000000030  | F | F | F |
|         | 0.7493512203180581  | 0.7498164621226586  | 0.4011636839015778  | T | T | T |
|         | 0.9166669999999968  | 0.8333330000000032  | 0.0514190000000028  | F | F | F |
|         | 0.9164403030181150  | 0.8331990590052626  | 0.3146212734102345  | T | T | T |
|         | 0.8334518541970142  | 0.9167724050593037  | 0.2268942616346698  | T | T | T |
|         | 0.3748783429171649  | 0.3737530988479459  | 0.4653944009764563  | T | T | T |
|         | 0.3745618070756778  | 0.3731897984790886  | 0.5166970587119520  | T | T | T |
| OT site | 1.0000000000000000  |                     |                     |   |   |   |
|         | 8.6223998537762103  | -4.9781448766382903 | 0.0000000000000000  |   |   |   |
|         | 0.0000000000000000  | 9.9562897532765700  | 0.0000000000000000  |   |   |   |
|         | 0.0000000000000000  | 0.0000000000000000  | 23.1292765422759992 |   |   |   |
|         | Ni                  | C                   | O                   |   |   |   |

80 1 1  
Selective dynamics  
Direct

|                    |                    |                    |       |
|--------------------|--------------------|--------------------|-------|
| 0.0000000000000000 | 0.0000000000000000 | 0.1392871528000015 | F F F |
| 0.9976305941872888 | 0.9976664163418595 | 0.4009746324369091 | T T T |
| 0.1666666667000030 | 0.0833333329999970 | 0.0514193316000018 | F F F |
| 0.1674426406055249 | 0.0848112671617005 | 0.3150572415854060 | T T T |
| 0.0837490379975934 | 0.1670887795676547 | 0.2271380847187862 | T T T |
| 0.2500000000000000 | 0.0000000000000000 | 0.1392871528000015 | F F F |
| 0.2499594384290260 | 0.9974629384891166 | 0.4010730534150235 | T T T |
| 0.4166666667000030 | 0.0833333329999970 | 0.0514193316000018 | F F F |
| 0.4162530798723718 | 0.0834087992732327 | 0.3145229351091870 | T T T |
| 0.3333041755129623 | 0.1666721222879796 | 0.2271201719853001 | T T T |
| 0.5000000000000000 | 0.0000000000000000 | 0.1392871528000015 | F F F |
| 0.5001765893834922 | 0.9996483357010588 | 0.4012104215268267 | T T T |
| 0.6666666667000030 | 0.0833333329999970 | 0.0514193316000018 | F F F |
| 0.6668579190066547 | 0.0835129128701518 | 0.3144546462791960 | T T T |
| 0.5832191530524689 | 0.1666402172446379 | 0.2268712904358679 | T T T |
| 0.7500000000000000 | 0.0000000000000000 | 0.1392871528000015 | F F F |
| 0.7491947783423774 | 0.9994947855168674 | 0.4011376478356291 | T T T |
| 0.9166666667000030 | 0.0833333329999970 | 0.0514193316000018 | F F F |
| 0.9168304658154363 | 0.0836094131517904 | 0.3145311828818397 | T T T |
| 0.8333497481164447 | 0.1666398754027570 | 0.2268175299736766 | T T T |
| 0.0000000000000000 | 0.2500000000000000 | 0.1392871528000015 | F F F |
| 0.9974763580813455 | 0.2498772869793782 | 0.4011187146492142 | T T T |
| 0.1666666667000030 | 0.3333333329999970 | 0.0514193316000018 | F F F |
| 0.1672270987172396 | 0.3326795174916412 | 0.3152784111364555 | T T T |
| 0.0830724347505088 | 0.4168767334348277 | 0.2266632772228334 | T T T |
| 0.2500000000000000 | 0.2500000000000000 | 0.1392871528000015 | F F F |
| 0.2498113140270779 | 0.2497667278667259 | 0.4063519887086403 | T T T |
| 0.4166666667000030 | 0.3333333329999970 | 0.0514193316000018 | F F F |
| 0.4149776324068739 | 0.3324682730444028 | 0.3151477094911423 | T T T |
| 0.3329278508072919 | 0.4162429275569984 | 0.2271531682971589 | T T T |
| 0.5000000000000000 | 0.2500000000000000 | 0.1392871528000015 | F F F |
| 0.5023059590950495 | 0.2498154970144044 | 0.4010803783423401 | T T T |
| 0.6666666667000030 | 0.3333333329999970 | 0.0514193316000018 | F F F |
| 0.6659573704519699 | 0.3331831346250940 | 0.3144443491697216 | T T T |
| 0.5837449940305121 | 0.4168063150567156 | 0.2266877717422044 | T T T |
| 0.7500000000000000 | 0.2500000000000000 | 0.1392871528000015 | F F F |
| 0.7499092129319546 | 0.2498967875696181 | 0.4010938944279430 | T T T |
| 0.9166666667000030 | 0.3333333329999970 | 0.0514193316000018 | F F F |
| 0.9171877787057694 | 0.3330700080979138 | 0.3145446451335056 | T T T |
| 0.8329852603770534 | 0.4163675678711660 | 0.2271161346287869 | T T T |
| 0.0000000000000000 | 0.5000000000000000 | 0.1392871528000015 | F F F |
| 0.9997939778811857 | 0.5001335035812587 | 0.4012943182761723 | T T T |
| 0.1666666667000030 | 0.5833333329999970 | 0.0514193316000018 | F F F |
| 0.1668494579900586 | 0.5826786078721797 | 0.3145629114387481 | T T T |
| 0.0833902957181160 | 0.6667838267599606 | 0.2270974586688794 | T T T |
| 0.2500000000000000 | 0.5000000000000000 | 0.1392871528000015 | F F F |
| 0.2500873288289157 | 0.5023817195484200 | 0.4011289166362821 | T T T |
| 0.4166666667000030 | 0.5833333329999970 | 0.0514193316000018 | F F F |

|                          |                    |                     |                     |   |   |   |
|--------------------------|--------------------|---------------------|---------------------|---|---|---|
|                          | 0.4163423449795710 | 0.5831020809762317  | 0.3145278125712837  | T | T | T |
|                          | 0.3333161305677985 | 0.6666218594481760  | 0.2268234321711273  | T | T | T |
|                          | 0.5000000000000000 | 0.5000000000000000  | 0.1392871528000015  | F | F | F |
|                          | 0.5021217951328188 | 0.5021555301761348  | 0.4009828066831594  | T | T | T |
|                          | 0.6666666667000030 | 0.5833333332999970  | 0.0514193316000018  | F | F | F |
|                          | 0.6661491505183424 | 0.5825971004541497  | 0.3145508429430318  | T | T | T |
|                          | 0.5832979566058217 | 0.6666201909384595  | 0.2268816181176103  | T | T | T |
|                          | 0.7500000000000000 | 0.5000000000000000  | 0.1392871528000015  | F | F | F |
|                          | 0.7503774509779011 | 0.5000418724205035  | 0.4011765233286474  | T | T | T |
|                          | 0.9166666667000030 | 0.5833333332999970  | 0.0514193316000018  | F | F | F |
|                          | 0.9165053803125839 | 0.5831622974705081  | 0.3146753494233001  | T | T | T |
|                          | 0.8333179577444638 | 0.6666719662887882  | 0.2271273349779054  | T | T | T |
|                          | 0.0000000000000000 | 0.7500000000000000  | 0.1392871528000015  | F | F | F |
|                          | 0.9996502130176506 | 0.7493100504647304  | 0.4011816439826785  | T | T | T |
|                          | 0.1666666667000030 | 0.8333333332999970  | 0.0514193316000018  | F | F | F |
|                          | 0.1665723650450330 | 0.8337185821163504  | 0.3144193236300128  | T | T | T |
|                          | 0.0831474319219672 | 0.9162454574677950  | 0.2266689972762592  | T | T | T |
|                          | 0.2500000000000000 | 0.7500000000000000  | 0.1392871528000015  | F | F | F |
|                          | 0.2499987608373894 | 0.7499966506744477  | 0.4010952520519264  | T | T | T |
|                          | 0.4166666667000030 | 0.8333333332999970  | 0.0514193316000018  | F | F | F |
|                          | 0.4163810723131949 | 0.8330062048673791  | 0.3144575549854667  | T | T | T |
|                          | 0.3331277623689012 | 0.9165630816047430  | 0.2268591947860880  | T | T | T |
|                          | 0.5000000000000000 | 0.7500000000000000  | 0.1392871528000015  | F | F | F |
|                          | 0.5003181173608533 | 0.7505564418872921  | 0.4011301315401662  | T | T | T |
|                          | 0.6666666667000030 | 0.8333333332999970  | 0.0514193316000018  | F | F | F |
|                          | 0.6666639392657930 | 0.8333181841381254  | 0.3143548123199044  | T | T | T |
|                          | 0.5833915064004522 | 0.9165567113394418  | 0.2268621928319390  | T | T | T |
|                          | 0.7500000000000000 | 0.7500000000000000  | 0.1392871528000015  | F | F | F |
|                          | 0.7499093907359053 | 0.7499224138915760  | 0.4010754106964522  | T | T | T |
|                          | 0.9166666667000030 | 0.8333333332999970  | 0.0514193316000018  | F | F | F |
|                          | 0.9172720401899472 | 0.8337084277208465  | 0.3145244754362540  | T | T | T |
|                          | 0.8333620104501130 | 0.9167061310549077  | 0.2268819959962314  | T | T | T |
|                          | 0.2475057428593794 | 0.2465190208665286  | 0.4814495287960560  | T | T | T |
|                          | 0.2461507798526811 | 0.2446502816676871  | 0.5317334715172586  | T | T | T |
| <b>(6) CO on Cu(111)</b> |                    |                     |                     |   |   |   |
| H site                   | 1.0000000000000000 |                     |                     |   |   |   |
|                          | 8.8905908144889398 | -5.1329849999999997 | 0.0000000000000000  |   |   |   |
|                          | 0.0000000000000000 | 10.2659699999999994 | 0.0000000000000000  |   |   |   |
|                          | 0.0000000000000000 | 0.0000000000000000  | 23.3821300000000001 |   |   |   |
|                          | C                  | Cu                  | O                   |   |   |   |
|                          | 1                  | 80                  | 1                   |   |   |   |
|                          | Selective dynamics |                     |                     |   |   |   |
|                          | Direct             |                     |                     |   |   |   |
|                          | 0.5832955118651555 | 0.4169812614836236  | 0.4450020229025375  | T | T | T |
|                          | 0.0000000000000000 | 0.0000000000000000  | 0.1155260000000027  | F | F | F |
|                          | 0.9999317220351617 | 0.0002072545345966  | 0.3819490681939098  | T | T | T |
|                          | 0.1666669999999968 | 0.0833330000000032  | 0.0259050000000016  | F | F | F |
|                          | 0.1668573067811472 | 0.0832988444439329  | 0.2930624947515530  | T | T | T |
|                          | 0.0834186609041711 | 0.1667888942714026  | 0.2044723254176546  | T | T | T |
|                          | 0.2500000000000000 | 0.0000000000000000  | 0.1155260000000027  | F | F | F |
|                          | 0.2495658584091355 | -0.0001641958485809 | 0.3821252972267242  | T | T | T |



|                     |                     |                    |   |   |   |
|---------------------|---------------------|--------------------|---|---|---|
| 0.416666999999968   | 0.083333000000032   | 0.025905000000016  | F | F | F |
| 0.4177301422224905  | 0.0856349513160878  | 0.2941465216376458 | T | T | T |
| 0.3331551349622195  | 0.1664638445204624  | 0.2043566127640461 | T | T | T |
| 0.5000000000000000  | 0.0000000000000000  | 0.1155260000000027 | F | F | F |
| 0.4999699899122078  | -0.0001342783435895 | 0.3821379763797930 | T | T | T |
| 0.666666999999968   | 0.083333000000032   | 0.025905000000016  | F | F | F |
| 0.6662727888537971  | 0.0833168071135492  | 0.2930644675819989 | T | T | T |
| 0.5831927893090865  | 0.1664695393822767  | 0.2043493686490352 | T | T | T |
| 0.7500000000000000  | 0.0000000000000000  | 0.1155260000000027 | F | F | F |
| 0.7499953677875849  | 0.0002448128575794  | 0.3819388033107644 | T | T | T |
| 0.916666999999968   | 0.083333000000032   | 0.025905000000016  | F | F | F |
| 0.9166393374930595  | 0.0834440434434195  | 0.2934049624022028 | T | T | T |
| 0.8332597201072320  | 0.1667928223837111  | 0.2044814283916929 | T | T | T |
| 0.0000000000000000  | 0.2500000000000000  | 0.1155260000000027 | F | F | F |
| -0.0001037136457084 | 0.2501381088242114  | 0.3819382988662284 | T | T | T |
| 0.166666999999968   | 0.333333000000032   | 0.025905000000016  | F | F | F |
| 0.1668403624003630  | 0.3338198300974876  | 0.2930521586559990 | T | T | T |
| 0.0833622652416577  | 0.4168636770290801  | 0.2043641193419086 | T | T | T |
| 0.2500000000000000  | 0.2500000000000000  | 0.1155260000000027 | F | F | F |
| 0.2473355136685324  | 0.2489034901127204  | 0.3814932519106503 | T | T | T |
| 0.416666999999968   | 0.333333000000032   | 0.025905000000016  | F | F | F |
| 0.4171797580294833  | 0.3337335696636844  | 0.2930775676453926 | T | T | T |
| 0.3331578545252762  | 0.4168650392306464  | 0.2043462234077106 | T | T | T |
| 0.5000000000000000  | 0.2500000000000000  | 0.1155260000000027 | F | F | F |
| 0.4993908453928866  | 0.2491603400241844  | 0.3851556663296735 | T | T | T |
| 0.666666999999968   | 0.333333000000032   | 0.025905000000016  | F | F | F |
| 0.6663499225731705  | 0.3337425103382884  | 0.2930755200493788 | T | T | T |
| 0.5833057979335845  | 0.4167448821844532  | 0.2042831410080359 | T | T | T |
| 0.7500000000000000  | 0.2500000000000000  | 0.1155260000000027 | F | F | F |
| 0.7512119405829181  | 0.2489306127636473  | 0.3815058066369257 | T | T | T |
| 0.916666999999968   | 0.333333000000032   | 0.025905000000016  | F | F | F |
| 0.9167700981878539  | 0.3338143127917624  | 0.2930631514014373 | T | T | T |
| 0.8335811520909050  | 0.4168587065172313  | 0.2043478247330338 | T | T | T |
| 0.0000000000000000  | 0.5000000000000000  | 0.1155260000000027 | F | F | F |
| 0.0002731757598016  | 0.5001626881536675  | 0.3821355392063515 | T | T | T |
| 0.166666999999968   | 0.583333000000032   | 0.025905000000016  | F | F | F |
| 0.1667660499328158  | 0.5837423834385380  | 0.2931685013116884 | T | T | T |
| 0.0827740627678801  | 0.6664751016447674  | 0.2047036897630317 | T | T | T |
| 0.2500000000000000  | 0.5000000000000000  | 0.1155260000000027 | F | F | F |
| 0.2495348613591326  | 0.5001725587055352  | 0.3821170460023179 | T | T | T |
| 0.416666999999968   | 0.583333000000032   | 0.025905000000016  | F | F | F |
| 0.4177062840011068  | 0.5823833773020846  | 0.2941350173835195 | T | T | T |
| 0.3335619383352303  | 0.6664893457531983  | 0.2047018199817023 | T | T | T |
| 0.5000000000000000  | 0.5000000000000000  | 0.1155260000000027 | F | F | F |
| 0.4993835521606914  | 0.5007733986602930  | 0.3851317030430482 | T | T | T |
| 0.666666999999968   | 0.583333000000032   | 0.025905000000016  | F | F | F |
| 0.6663585084161910  | 0.5829146866736737  | 0.2930739423809016 | T | T | T |
| 0.5831877512350858  | 0.6668970346461144  | 0.2043451412286064 | T | T | T |
| 0.7500000000000000  | 0.5000000000000000  | 0.1155260000000027 | F | F | F |
| 0.7510147818151144  | 0.5007827277255429  | 0.3851459969002898 | T | T | T |
| 0.916666999999968   | 0.583333000000032   | 0.025905000000016  | F | F | F |

|        |                    |                     |                     |   |   |   |
|--------|--------------------|---------------------|---------------------|---|---|---|
|        | 0.9144615770640645 | 0.5823649134610340  | 0.2941430983448117  | T | T | T |
|        | 0.8335893595436364 | 0.6669000589112223  | 0.2043530930036282  | T | T | T |
|        | 0.0000000000000000 | 0.7500000000000000  | 0.1155260000000027  | F | F | F |
|        | 0.0003193795697458 | 0.7505855552726411  | 0.3821209682604897  | T | T | T |
|        | 0.1666669999999968 | 0.8333330000000032  | 0.0259050000000016  | F | F | F |
|        | 0.1667892365405755 | 0.8333106665684933  | 0.2931669158400935  | T | T | T |
|        | 0.0833715290556116 | 0.9166806043274038  | 0.2043651108744315  | T | T | T |
|        | 0.2500000000000000 | 0.7500000000000000  | 0.1155260000000027  | F | F | F |
|        | 0.2499415788276573 | 0.7501974579307390  | 0.3821417450873755  | T | T | T |
|        | 0.4166669999999968 | 0.8333330000000032  | 0.0259050000000016  | F | F | F |
|        | 0.4163435639552154 | 0.8333244486556143  | 0.2931683100539997  | T | T | T |
|        | 0.3335784223280970 | 0.9172803766969622  | 0.2047030755929793  | T | T | T |
|        | 0.5000000000000000 | 0.7500000000000000  | 0.1155260000000027  | F | F | F |
|        | 0.4999606297350946 | 0.7506038276392373  | 0.3821161084977815  | T | T | T |
|        | 0.6666669999999968 | 0.8333330000000032  | 0.0259050000000016  | F | F | F |
|        | 0.6662638662940760 | 0.8332485472884202  | 0.2930505787709185  | T | T | T |
|        | 0.5831879056987026 | 0.9166903306614748  | 0.2043637915727251  | T | T | T |
|        | 0.7500000000000000 | 0.7500000000000000  | 0.1155260000000027  | F | F | F |
|        | 0.7512431040337076 | 0.7528211710905456  | 0.3814890795864271  | T | T | T |
|        | 0.9166669999999968 | 0.8333330000000032  | 0.0259050000000016  | F | F | F |
|        | 0.9167899418148705 | 0.8332313486120433  | 0.2930599123620830  | T | T | T |
|        | 0.8332653372446314 | 0.9166383829737443  | 0.2044709733192838  | T | T | T |
|        | 0.5831929178464907 | 0.4171304320854400  | 0.4956606335412757  | T | T | T |
| B site | 1.0000000000000000 |                     |                     |   |   |   |
|        | 8.8905908144889398 | -5.1329849999999997 | 0.0000000000000000  |   |   |   |
|        | 0.0000000000000000 | 10.2659699999999994 | 0.0000000000000000  |   |   |   |
|        | 0.0000000000000000 | 0.0000000000000000  | 23.3821300000000001 |   |   |   |
|        | C                  | Cu                  | O                   |   |   |   |
|        | 1                  | 80                  | 1                   |   |   |   |
|        | Selective dynamics |                     |                     |   |   |   |
|        | Direct             |                     |                     |   |   |   |
|        | 0.6294658675029290 | 0.5090596288703030  | 0.4490659627220569  | T | T | T |
|        | 0.0000000000000000 | 0.0000000000000000  | 0.1155260000000027  | F | F | F |
|        | 0.0005275350615778 | 0.0005869729133775  | 0.3821510271438652  | T | T | T |
|        | 0.1666669999999968 | 0.8333330000000032  | 0.0259050000000016  | F | F | F |
|        | 0.1665547724329059 | 0.0831083829106335  | 0.2930726172760093  | T | T | T |
|        | 0.0834355699333384 | 0.1665961416047951  | 0.2044223834243772  | T | T | T |
|        | 0.2500000000000000 | 0.0000000000000000  | 0.1155260000000027  | F | F | F |
|        | 0.2494026617449038 | 0.9993953129530845  | 0.3820025958311157  | T | T | T |
|        | 0.4166669999999968 | 0.8333330000000032  | 0.0259050000000016  | F | F | F |
|        | 0.4167404026427769 | 0.0834783331950133  | 0.2932498611270756  | T | T | T |
|        | 0.3333390010376733 | 0.1666712302175935  | 0.2045859595098481  | T | T | T |
|        | 0.5000000000000000 | 0.0000000000000000  | 0.1155260000000027  | F | F | F |
|        | 0.5000050145131886 | 0.9994277838626163  | 0.3820142408836341  | T | T | T |
|        | 0.6666669999999968 | 0.8333330000000032  | 0.0259050000000016  | F | F | F |
|        | 0.6665679117364761 | 0.0831080541950635  | 0.2930710746740481  | T | T | T |
|        | 0.5833224749272844 | 0.1666618013962981  | 0.2045819507804674  | T | T | T |
|        | 0.7500000000000000 | 0.0000000000000000  | 0.1155260000000027  | F | F | F |
|        | 0.7500612570994473 | 0.0006055811976294  | 0.3821494902244375  | T | T | T |
|        | 0.9166669999999968 | 0.8333330000000032  | 0.0259050000000016  | F | F | F |
|        | 0.9167338398323526 | 0.0834631918619761  | 0.2934318416347656  | T | T | T |

|                    |                    |                    |   |   |   |
|--------------------|--------------------|--------------------|---|---|---|
| 0.8331536836422485 | 0.1665949451625227 | 0.2044265189501690 | T | T | T |
| 0.0000000000000000 | 0.2500000000000000 | 0.1155260000000027 | F | F | F |
| 0.0000397351864566 | 0.2500787699432870 | 0.3821040837940775 | T | T | T |
| 0.1666669999999968 | 0.3333330000000032 | 0.0259050000000016 | F | F | F |
| 0.1667584270258387 | 0.3334644648906767 | 0.2932361797660814 | T | T | T |
| 0.0832645924521117 | 0.4165334095577478 | 0.2044239052922413 | T | T | T |
| 0.2500000000000000 | 0.2500000000000000 | 0.1155260000000027 | F | F | F |
| 0.2489604865116098 | 0.2492972696924051 | 0.3819427962392640 | T | T | T |
| 0.4166669999999968 | 0.3333330000000032 | 0.0259050000000016 | F | F | F |
| 0.4178196123407927 | 0.3343627685294373 | 0.2937401884142513 | T | T | T |
| 0.3332280286939123 | 0.4165481672217757 | 0.2046208062832237 | T | T | T |
| 0.5000000000000000 | 0.2500000000000000 | 0.1155260000000027 | F | F | F |
| 0.4980697531476696 | 0.2461459589367277 | 0.3824048750668099 | T | T | T |
| 0.6666669999999968 | 0.3333330000000032 | 0.0259050000000016 | F | F | F |
| 0.6665543931124946 | 0.3343605642926591 | 0.2937432969644298 | T | T | T |
| 0.5831215912877206 | 0.4162523833731355 | 0.2041219298939352 | T | T | T |
| 0.7500000000000000 | 0.2500000000000000 | 0.1155260000000027 | F | F | F |
| 0.7503348483719466 | 0.2493113732856219 | 0.3819485295791810 | T | T | T |
| 0.9166669999999968 | 0.3333330000000032 | 0.0259050000000016 | F | F | F |
| 0.9167140851948504 | 0.3334569169043759 | 0.2932407616797588 | T | T | T |
| 0.8333175768369828 | 0.4165399978507556 | 0.2046211787255714 | T | T | T |
| 0.0000000000000000 | 0.5000000000000000 | 0.1155260000000027 | F | F | F |
| 0.0001821622245059 | 0.4998806672104766 | 0.3822953717133199 | T | T | T |
| 0.1666669999999968 | 0.5833330000000032 | 0.0259050000000016 | F | F | F |
| 0.1666094232548231 | 0.5831992718043522 | 0.2932281450047033 | T | T | T |
| 0.0826807726222522 | 0.6661376608505140 | 0.2047556834641581 | T | T | T |
| 0.2500000000000000 | 0.5000000000000000 | 0.1155260000000027 | F | F | F |
| 0.2496804099316552 | 0.4998769005904277 | 0.3822928818587302 | T | T | T |
| 0.4166669999999968 | 0.5833330000000032 | 0.0259050000000016 | F | F | F |
| 0.4180182871081906 | 0.5824746448997268 | 0.2941272381146466 | T | T | T |
| 0.3334567262221687 | 0.6661508122540923 | 0.2047537001675875 | T | T | T |
| 0.5000000000000000 | 0.5000000000000000 | 0.1155260000000027 | F | F | F |
| 0.4988981702024740 | 0.5001710419000247 | 0.3850586930263333 | T | T | T |
| 0.6666669999999968 | 0.5833330000000032 | 0.0259050000000016 | F | F | F |
| 0.6666697669789768 | 0.5833038727753121 | 0.2919438622677979 | T | T | T |
| 0.5830459148800892 | 0.6667981468474968 | 0.2040310429971600 | T | T | T |
| 0.7500000000000000 | 0.5000000000000000 | 0.1155260000000027 | F | F | F |
| 0.7512424978942902 | 0.5001788331352127 | 0.3850648334888766 | T | T | T |
| 0.9166669999999968 | 0.5833330000000032 | 0.0259050000000016 | F | F | F |
| 0.9144661666032102 | 0.5824706582470554 | 0.2941262105917877 | T | T | T |
| 0.8337547917694946 | 0.6668052226460423 | 0.2040220474594186 | T | T | T |
| 0.0000000000000000 | 0.7500000000000000 | 0.1155260000000027 | F | F | F |
| 0.0013107385057210 | 0.7508860894507950 | 0.3820297653578933 | T | T | T |
| 0.1666669999999968 | 0.8333330000000032 | 0.0259050000000016 | F | F | F |
| 0.1667348208496994 | 0.8330252204474710 | 0.2930247283578512 | T | T | T |
| 0.0829020807978681 | 0.9162234069401157 | 0.2044986976441657 | T | T | T |
| 0.2500000000000000 | 0.7500000000000000 | 0.1155260000000027 | F | F | F |
| 0.2499131796208039 | 0.7498244450079922 | 0.3820540168197498 | T | T | T |
| 0.4166669999999968 | 0.8333330000000032 | 0.0259050000000016 | F | F | F |
| 0.4163065116606621 | 0.8330259447418064 | 0.2930318243090722 | T | T | T |
| 0.3332920341302237 | 0.9165756062428893 | 0.2041895259030898 | T | T | T |

|         |                                                                                                                                                                                                                                                                                                                                                                                                                                                                                                                                                                                                                                                                                                                                                                                                                                                                                                                                                                                                                                                                                                                                                                                                                                                                                                                                                                                                                                                                                                                                                                                                                                                                                                                                                                                                                                                                                                                                                                                                                                                                                                                                                                                                                                                                                                                                                                                                                                                                 |
|---------|-----------------------------------------------------------------------------------------------------------------------------------------------------------------------------------------------------------------------------------------------------------------------------------------------------------------------------------------------------------------------------------------------------------------------------------------------------------------------------------------------------------------------------------------------------------------------------------------------------------------------------------------------------------------------------------------------------------------------------------------------------------------------------------------------------------------------------------------------------------------------------------------------------------------------------------------------------------------------------------------------------------------------------------------------------------------------------------------------------------------------------------------------------------------------------------------------------------------------------------------------------------------------------------------------------------------------------------------------------------------------------------------------------------------------------------------------------------------------------------------------------------------------------------------------------------------------------------------------------------------------------------------------------------------------------------------------------------------------------------------------------------------------------------------------------------------------------------------------------------------------------------------------------------------------------------------------------------------------------------------------------------------------------------------------------------------------------------------------------------------------------------------------------------------------------------------------------------------------------------------------------------------------------------------------------------------------------------------------------------------------------------------------------------------------------------------------------------------|
|         | 0.5000000000000000 0.7500000000000000 0.1155260000000027 F F F                                                                                                                                                                                                                                                                                                                                                                                                                                                                                                                                                                                                                                                                                                                                                                                                                                                                                                                                                                                                                                                                                                                                                                                                                                                                                                                                                                                                                                                                                                                                                                                                                                                                                                                                                                                                                                                                                                                                                                                                                                                                                                                                                                                                                                                                                                                                                                                                  |
|         | 0.4995743092533374 0.7508886532652430 0.3820371407081929 T T T                                                                                                                                                                                                                                                                                                                                                                                                                                                                                                                                                                                                                                                                                                                                                                                                                                                                                                                                                                                                                                                                                                                                                                                                                                                                                                                                                                                                                                                                                                                                                                                                                                                                                                                                                                                                                                                                                                                                                                                                                                                                                                                                                                                                                                                                                                                                                                                                  |
|         | 0.6666669999999968 0.8333330000000032 0.0259050000000016 F F F                                                                                                                                                                                                                                                                                                                                                                                                                                                                                                                                                                                                                                                                                                                                                                                                                                                                                                                                                                                                                                                                                                                                                                                                                                                                                                                                                                                                                                                                                                                                                                                                                                                                                                                                                                                                                                                                                                                                                                                                                                                                                                                                                                                                                                                                                                                                                                                                  |
|         | 0.6664435217633266 0.8324051845454439 0.2934378006911622 T T T                                                                                                                                                                                                                                                                                                                                                                                                                                                                                                                                                                                                                                                                                                                                                                                                                                                                                                                                                                                                                                                                                                                                                                                                                                                                                                                                                                                                                                                                                                                                                                                                                                                                                                                                                                                                                                                                                                                                                                                                                                                                                                                                                                                                                                                                                                                                                                                                  |
|         | 0.5833115199511828 0.9162188312568766 0.2044992195488179 T T T                                                                                                                                                                                                                                                                                                                                                                                                                                                                                                                                                                                                                                                                                                                                                                                                                                                                                                                                                                                                                                                                                                                                                                                                                                                                                                                                                                                                                                                                                                                                                                                                                                                                                                                                                                                                                                                                                                                                                                                                                                                                                                                                                                                                                                                                                                                                                                                                  |
|         | 0.7500000000000000 0.7500000000000000 0.1155260000000027 F F F                                                                                                                                                                                                                                                                                                                                                                                                                                                                                                                                                                                                                                                                                                                                                                                                                                                                                                                                                                                                                                                                                                                                                                                                                                                                                                                                                                                                                                                                                                                                                                                                                                                                                                                                                                                                                                                                                                                                                                                                                                                                                                                                                                                                                                                                                                                                                                                                  |
|         | 0.7516070599494571 0.7532122039700874 0.3826040966503975 T T T                                                                                                                                                                                                                                                                                                                                                                                                                                                                                                                                                                                                                                                                                                                                                                                                                                                                                                                                                                                                                                                                                                                                                                                                                                                                                                                                                                                                                                                                                                                                                                                                                                                                                                                                                                                                                                                                                                                                                                                                                                                                                                                                                                                                                                                                                                                                                                                                  |
|         | 0.9166669999999968 0.8333330000000032 0.0259050000000016 F F F                                                                                                                                                                                                                                                                                                                                                                                                                                                                                                                                                                                                                                                                                                                                                                                                                                                                                                                                                                                                                                                                                                                                                                                                                                                                                                                                                                                                                                                                                                                                                                                                                                                                                                                                                                                                                                                                                                                                                                                                                                                                                                                                                                                                                                                                                                                                                                                                  |
|         | 0.9159753688030179 0.8324093523066746 0.2934462337547242 T T T                                                                                                                                                                                                                                                                                                                                                                                                                                                                                                                                                                                                                                                                                                                                                                                                                                                                                                                                                                                                                                                                                                                                                                                                                                                                                                                                                                                                                                                                                                                                                                                                                                                                                                                                                                                                                                                                                                                                                                                                                                                                                                                                                                                                                                                                                                                                                                                                  |
|         | 0.8333020655881515 0.9166101482391281 0.2046754412205885 T T T                                                                                                                                                                                                                                                                                                                                                                                                                                                                                                                                                                                                                                                                                                                                                                                                                                                                                                                                                                                                                                                                                                                                                                                                                                                                                                                                                                                                                                                                                                                                                                                                                                                                                                                                                                                                                                                                                                                                                                                                                                                                                                                                                                                                                                                                                                                                                                                                  |
|         | 0.6305332724341021 0.5111231591369602 0.4993922614864493 T T T                                                                                                                                                                                                                                                                                                                                                                                                                                                                                                                                                                                                                                                                                                                                                                                                                                                                                                                                                                                                                                                                                                                                                                                                                                                                                                                                                                                                                                                                                                                                                                                                                                                                                                                                                                                                                                                                                                                                                                                                                                                                                                                                                                                                                                                                                                                                                                                                  |
| OT site | 1.0000000000000000<br>8.8905908144889398 -5.1329849999999997 0.0000000000000000<br>0.0000000000000000 10.2659699999999994 0.0000000000000000<br>0.0000000000000000 0.0000000000000000 23.3821300000000001<br>C Cu O<br>1 80 1<br>Selective dynamics<br>Direct<br>0.4992018534997938 0.4984570510709422 0.4660919846744054 T T T<br>0.0000000000000000 0.0000000000000000 0.1155260000000027 F F F<br>0.9999643683502265 -0.0000492256828297 0.3819900285438395 T T T<br>0.1666669999999968 0.0833330000000032 0.0259050000000016 F F F<br>0.1667228371091960 0.0832330036970940 0.2929456772681963 T T T<br>0.0835758432760530 0.1669345726912513 0.2044869113149860 T T T<br>0.2500000000000000 0.0000000000000000 0.1155260000000027 F F F<br>0.2497318506697336 0.9994740298398377 0.3818074262145784 T T T<br>0.4166669999999968 0.0833330000000032 0.0259050000000016 F F F<br>0.4164996443121675 0.0832338672291938 0.2929445889713928 T T T<br>0.3337482518596478 0.1675135166735753 0.2047267012828938 T T T<br>0.5000000000000000 0.0000000000000000 0.1155260000000027 F F F<br>0.4999732799402704 -0.0000481895417297 0.3819879739073242 T T T<br>0.6666669999999968 0.0833330000000032 0.0259050000000016 F F F<br>0.6666403517214277 0.0833028569832850 0.2931582547654385 T T T<br>0.5833403854834149 0.1669348589898652 0.2044862170011512 T T T<br>0.7500000000000000 0.0000000000000000 0.1155260000000027 F F F<br>0.7503311991768389 0.0006778497350464 0.3820681081953495 T T T<br>0.9166669999999968 0.0833330000000032 0.0259050000000016 F F F<br>0.9166525054724216 0.0833030403758578 0.2931588775956268 T T T<br>0.8333158785181256 0.1666509042329297 0.2043207626109815 T T T<br>0.0000000000000000 0.2500000000000000 0.1155260000000027 F F F<br>0.9992600641321518 0.2496116815892529 0.3820679831136499 T T T<br>0.1666669999999968 0.3333330000000032 0.0259050000000016 F F F<br>0.1671115183461719 0.3335395818348827 0.2932813953620876 T T T<br>0.0835768118024928 0.4166294484318678 0.2044851577321382 T T T<br>0.2500000000000000 0.2500000000000000 0.1155260000000027 F F F<br>0.2471343182019319 0.2473870980879123 0.3817181509080387 T T T<br>0.4166669999999968 0.3333330000000032 0.0259050000000016 F F F<br>0.4175778497547744 0.3351662849497204 0.2943507572507000 T T T<br>0.3335674362519597 0.4167819475252338 0.2044320637620967 T T T<br>0.5000000000000000 0.2500000000000000 0.1155260000000027 F F F |

|                     |                    |                    |   |   |   |
|---------------------|--------------------|--------------------|---|---|---|
| 0.5002372123125185  | 0.2473964415377242 | 0.3817155129190438 | T | T | T |
| 0.6666669999999968  | 0.3333330000000032 | 0.0259050000000016 | F | F | F |
| 0.6664203362273126  | 0.3335406194500259 | 0.2932806452495351 | T | T | T |
| 0.5831962876864444  | 0.4167823761675885 | 0.2044321544252374 | T | T | T |
| 0.7500000000000000  | 0.2500000000000000 | 0.1155260000000027 | F | F | F |
| 0.7503360873424133  | 0.2496116395319180 | 0.3820673541801981 | T | T | T |
| 0.9166669999999968  | 0.3333330000000032 | 0.0259050000000016 | F | F | F |
| 0.9166528485688483  | 0.3333150863385422 | 0.2931553317752971 | T | T | T |
| 0.8330344933189606  | 0.4166300116558090 | 0.2044849518447122 | T | T | T |
| 0.0000000000000000  | 0.5000000000000000 | 0.1155260000000027 | F | F | F |
| -0.0000226424288447 | 0.4999701597137435 | 0.3819881683732978 | T | T | T |
| 0.1666669999999968  | 0.5833330000000032 | 0.0259050000000016 | F | F | F |
| 0.1667234633490841  | 0.5834510078408501 | 0.2929465520625115 | T | T | T |
| 0.0832958450851871  | 0.6666086975642865 | 0.2041472247361275 | T | T | T |
| 0.2500000000000000  | 0.5000000000000000 | 0.1155260000000027 | F | F | F |
| 0.2471707601769901  | 0.4997072333287286 | 0.3817244040597899 | T | T | T |
| 0.4166669999999968  | 0.5833330000000032 | 0.0259050000000016 | F | F | F |
| 0.4175893017823911  | 0.5823563258204730 | 0.2943744125913052 | T | T | T |
| 0.3337527881686111  | 0.6662197749557217 | 0.2047365503396348 | T | T | T |
| 0.5000000000000000  | 0.5000000000000000 | 0.1155260000000027 | F | F | F |
| 0.4999642967875632  | 0.4999492995147166 | 0.3869469425744673 | T | T | T |
| 0.6666669999999968  | 0.5833330000000032 | 0.0259050000000016 | F | F | F |
| 0.6647517405765053  | 0.5823533098998938 | 0.2943758077198463 | T | T | T |
| 0.5831933985665031  | 0.6664045398629916 | 0.2044373232550389 | T | T | T |
| 0.7500000000000000  | 0.5000000000000000 | 0.1155260000000027 | F | F | F |
| 0.7525229583926434  | 0.4997144019250775 | 0.3817239960302892 | T | T | T |
| 0.9166669999999968  | 0.5833330000000032 | 0.0259050000000016 | F | F | F |
| 0.9167213162731596  | 0.5834545081460163 | 0.2929458689801947 | T | T | T |
| 0.8324475912223703  | 0.6662186217410481 | 0.2047375679915600 | T | T | T |
| 0.0000000000000000  | 0.7500000000000000 | 0.1155260000000027 | F | F | F |
| 0.0004566905933605  | 0.7502061071373106 | 0.3818082379768443 | T | T | T |
| 0.1666669999999968  | 0.8333330000000032 | 0.0259050000000016 | F | F | F |
| 0.1666478300953391  | 0.8333004057263029 | 0.2928352174355526 | T | T | T |
| 0.0832976784467449  | 0.9166751387377939 | 0.2041491349341931 | T | T | T |
| 0.2500000000000000  | 0.7500000000000000 | 0.1155260000000027 | F | F | F |
| 0.2497406425574502  | 0.7502051302300619 | 0.3818082568383281 | T | T | T |
| 0.4166669999999968  | 0.8333330000000032 | 0.0259050000000016 | F | F | F |
| 0.4165059755381499  | 0.8332316160371588 | 0.2929461534943237 | T | T | T |
| 0.3333604117119047  | 0.9166752587736228 | 0.2041489597485078 | T | T | T |
| 0.5000000000000000  | 0.7500000000000000 | 0.1155260000000027 | F | F | F |
| 0.5002501425212849  | 0.7527513868731751 | 0.3817240178282266 | T | T | T |
| 0.6666669999999968  | 0.8333330000000032 | 0.0259050000000016 | F | F | F |
| 0.6664238631238822  | 0.8328551162026737 | 0.2932795963519766 | T | T | T |
| 0.5833389989103193  | 0.9163917904982000 | 0.2044842763360958 | T | T | T |
| 0.7500000000000000  | 0.7500000000000000 | 0.1155260000000027 | F | F | F |
| 0.7524975917806451  | 0.7527553035855654 | 0.3817240107414863 | T | T | T |
| 0.9166669999999968  | 0.8333330000000032 | 0.0259050000000016 | F | F | F |
| 0.9167204423627044  | 0.8332329149617947 | 0.2929469352959077 | T | T | T |
| 0.8330346530503253  | 0.9163914821908289 | 0.2044847766587485 | T | T | T |
| 0.4988625467875422  | 0.4977544158334596 | 0.5155840014525463 | T | T | T |

(7) CO Pd(111)

|        |                     |                     |                      |       |
|--------|---------------------|---------------------|----------------------|-------|
| H site | 1.000000000000000   |                     |                      |       |
|        | 9.6381542603135379  | -5.5645909566831619 | -0.00000000000000020 |       |
|        | 0.00000000000000000 | 11.1291819133663008 | 0.00000000000000000  |       |
|        | 0.00000000000000000 | 0.00000000000000000 | 24.0869389807863001  |       |
|        | C Pd O              |                     |                      |       |
|        | 1 80 1              |                     |                      |       |
|        | Selective dynamics  |                     |                      |       |
|        | Direct              |                     |                      |       |
|        | 0.5840407028956873  | 0.4163750895976616  | 0.4605139979532620   | T T T |
|        | 0.1666666667000030  | 0.333333332999970   | 0.0263705027999990   | F F F |
|        | 0.00000000000000000 | 0.00000000000000000 | 0.1206844688000004   | F F F |
|        | 0.3336319049959187  | 0.1665387044013162  | 0.2149386594727397   | T T T |
|        | 0.1669994664619582  | 0.3333571672438964  | 0.3086967595241993   | T T T |
|        | 0.0005606357164149  | -0.0002457533740299 | 0.4032126782153926   | T T T |
|        | 0.1666666667000030  | 0.083333332999970   | 0.0263705027999990   | F F F |
|        | 0.00000000000000000 | 0.25000000000000000 | 0.1206844688000004   | F F F |
|        | 0.3337535445396056  | 0.4170464380935868  | 0.2149035431945675   | T T T |
|        | 0.1670034911436331  | 0.0832476218948726  | 0.3086106202947576   | T T T |
|        | 0.0005366382602563  | 0.2500451454643100  | 0.4033230882241571   | T T T |
|        | 0.4166666667000030  | 0.083333332999970   | 0.0263705027999990   | F F F |
|        | 0.25000000000000000 | 0.25000000000000000 | 0.1206844688000004   | F F F |
|        | 0.0836025903250119  | 0.4168526709172563  | 0.2146635881565819   | T T T |
|        | 0.4175999806472990  | 0.0845596872319170  | 0.3095190422073242   | T T T |
|        | 0.2464390882999653  | 0.2477982379793616  | 0.4034831462725027   | T T T |
|        | 0.4166666667000030  | 0.333333332999970   | 0.0263705027999990   | F F F |
|        | 0.25000000000000000 | 0.00000000000000000 | 0.1206844688000004   | F F F |
|        | 0.0835889381898291  | 0.1667771690862087  | 0.2146364114875670   | T T T |
|        | 0.4171860911848373  | 0.3333826652184717  | 0.3098830173157863   | T T T |
|        | 0.2504982938695641  | -0.0001246280943821 | 0.4034456206438755   | T T T |
|        | 0.6666666667000030  | 0.333333332999970   | 0.0263705027999990   | F F F |
|        | 0.50000000000000000 | 0.00000000000000000 | 0.1206844688000004   | F F F |
|        | 0.8333531490524561  | 0.1667012398317782  | 0.2147677848285582   | T T T |
|        | 0.6667778600828503  | 0.3333387475902124  | 0.3097783055721033   | T T T |
|        | 0.5004128290536860  | -0.0002550504286775 | 0.4033921987169277   | T T T |
|        | 0.6666666667000030  | 0.083333332999970   | 0.0263705027999990   | F F F |
|        | 0.50000000000000000 | 0.25000000000000000 | 0.1206844688000004   | F F F |
|        | 0.8336948530036893  | 0.4170597222697678  | 0.2148653344718304   | T T T |
|        | 0.6668515019581092  | 0.0832203954744252  | 0.3086436539558303   | T T T |
|        | 0.4997216567257083  | 0.2481030305771449  | 0.4076884329160385   | T T T |
|        | 0.9166666667000030  | 0.083333332999970   | 0.0263705027999990   | F F F |
|        | 0.75000000000000000 | 0.25000000000000000 | 0.1206844688000004   | F F F |
|        | 0.5834932601762127  | 0.4166267644433655  | 0.2153047038074230   | T T T |
|        | 0.9169235098947300  | 0.0832647226948035  | 0.3086762985148160   | T T T |
|        | 0.7524335676903137  | 0.2478076103012644  | 0.4034335971220245   | T T T |
|        | 0.9166666667000030  | 0.333333332999970   | 0.0263705027999990   | F F F |
|        | 0.75000000000000000 | 0.00000000000000000 | 0.1206844688000004   | F F F |
|        | 0.5830546417374530  | 0.1664320901501565  | 0.2148561545480289   | T T T |
|        | 0.9169785795589375  | 0.3333670182755343  | 0.3086476947496663   | T T T |
|        | 0.7502658035466521  | -0.0002826114756370 | 0.4033202456333536   | T T T |
|        | 0.1666666667000030  | 0.833333332999970   | 0.0263705027999990   | F F F |
|        | 0.00000000000000000 | 0.50000000000000000 | 0.1206844688000004   | F F F |

|         |                                                                                                                                                                                                                                                                                                                                                                                                                                                                                                                                        |
|---------|----------------------------------------------------------------------------------------------------------------------------------------------------------------------------------------------------------------------------------------------------------------------------------------------------------------------------------------------------------------------------------------------------------------------------------------------------------------------------------------------------------------------------------------|
|         | 0.3332517844756150 0.6667879673946894 0.2147364039662499 T T T                                                                                                                                                                                                                                                                                                                                                                                                                                                                         |
|         | 0.1668166640587556 0.8332732058735223 0.3088239491827812 T T T                                                                                                                                                                                                                                                                                                                                                                                                                                                                         |
|         | 0.0005366192560807 0.4999044483702691 0.4034026202827029 T T T                                                                                                                                                                                                                                                                                                                                                                                                                                                                         |
|         | 0.1666666667000030 0.5833333332999970 0.0263705027999990 F F F                                                                                                                                                                                                                                                                                                                                                                                                                                                                         |
|         | 0.0000000000000000 0.7500000000000000 0.1206844688000004 F F F                                                                                                                                                                                                                                                                                                                                                                                                                                                                         |
|         | 0.3331472922867003 0.9161122464824618 0.2145448149349369 T T T                                                                                                                                                                                                                                                                                                                                                                                                                                                                         |
|         | 0.1669045952639960 0.5832049798564033 0.3088257595114843 T T T                                                                                                                                                                                                                                                                                                                                                                                                                                                                         |
|         | 0.0004771472400370 0.7498427706480890 0.4034390271831912 T T T                                                                                                                                                                                                                                                                                                                                                                                                                                                                         |
|         | 0.4166666667000030 0.5833333332999970 0.0263705027999990 F F F                                                                                                                                                                                                                                                                                                                                                                                                                                                                         |
|         | 0.2500000000000000 0.7500000000000000 0.1206844688000004 F F F                                                                                                                                                                                                                                                                                                                                                                                                                                                                         |
|         | 0.0835042746276182 0.9165301533168314 0.2146515252117512 T T T                                                                                                                                                                                                                                                                                                                                                                                                                                                                         |
|         | 0.4176028166446101 0.5825602202349592 0.3096708453825980 T T T                                                                                                                                                                                                                                                                                                                                                                                                                                                                         |
|         | 0.2504714220481851 0.7498580410434389 0.4034936903999738 T T T                                                                                                                                                                                                                                                                                                                                                                                                                                                                         |
|         | 0.4166666667000030 0.8333333332999970 0.0263705027999990 F F F                                                                                                                                                                                                                                                                                                                                                                                                                                                                         |
|         | 0.2500000000000000 0.5000000000000000 0.1206844688000004 F F F                                                                                                                                                                                                                                                                                                                                                                                                                                                                         |
|         | 0.0839799312403942 0.6669427377859786 0.2145475952082778 T T T                                                                                                                                                                                                                                                                                                                                                                                                                                                                         |
|         | 0.4169618582112439 0.8332856403263995 0.3088030243141980 T T T                                                                                                                                                                                                                                                                                                                                                                                                                                                                         |
|         | 0.2505217547167885 0.4998465419907653 0.4035291537563555 T T T                                                                                                                                                                                                                                                                                                                                                                                                                                                                         |
|         | 0.6666666667000030 0.8333333332999970 0.0263705027999990 F F F                                                                                                                                                                                                                                                                                                                                                                                                                                                                         |
|         | 0.5000000000000000 0.5000000000000000 0.1206844688000004 F F F                                                                                                                                                                                                                                                                                                                                                                                                                                                                         |
|         | 0.8335368836939476 0.6664309948584898 0.2149383137356439 T T T                                                                                                                                                                                                                                                                                                                                                                                                                                                                         |
|         | 0.6667802115004865 0.8331625005335219 0.3086993899391032 T T T                                                                                                                                                                                                                                                                                                                                                                                                                                                                         |
|         | 0.4997698320830287 0.5004189903564353 0.4077485963730184 T T T                                                                                                                                                                                                                                                                                                                                                                                                                                                                         |
|         | 0.6666666667000030 0.5833333332999970 0.0263705027999990 F F F                                                                                                                                                                                                                                                                                                                                                                                                                                                                         |
|         | 0.5000000000000000 0.7500000000000000 0.1206844688000004 F F F                                                                                                                                                                                                                                                                                                                                                                                                                                                                         |
|         | 0.8332898770927365 0.9164847136712817 0.2146353117452145 T T T                                                                                                                                                                                                                                                                                                                                                                                                                                                                         |
|         | 0.6668351851808940 0.5829980954355773 0.3098752765249654 T T T                                                                                                                                                                                                                                                                                                                                                                                                                                                                         |
|         | 0.5004002397818411 0.7497257656384202 0.4035255814825658 T T T                                                                                                                                                                                                                                                                                                                                                                                                                                                                         |
|         | 0.9166666667000030 0.5833333332999970 0.0263705027999990 F F F                                                                                                                                                                                                                                                                                                                                                                                                                                                                         |
|         | 0.7500000000000000 0.7500000000000000 0.1206844688000004 F F F                                                                                                                                                                                                                                                                                                                                                                                                                                                                         |
|         | 0.5832275928232870 0.9164927012035945 0.2146555262687293 T T T                                                                                                                                                                                                                                                                                                                                                                                                                                                                         |
|         | 0.9156376886395833 0.5825835954536955 0.3095181336380993 T T T                                                                                                                                                                                                                                                                                                                                                                                                                                                                         |
|         | 0.7524916803437928 0.7538320944808679 0.4034790545459201 T T T                                                                                                                                                                                                                                                                                                                                                                                                                                                                         |
|         | 0.9166666667000030 0.8333333332999970 0.0263705027999990 F F F                                                                                                                                                                                                                                                                                                                                                                                                                                                                         |
|         | 0.7500000000000000 0.5000000000000000 0.1206844688000004 F F F                                                                                                                                                                                                                                                                                                                                                                                                                                                                         |
|         | 0.5830480833546671 0.6663536357453995 0.2149079908963154 T T T                                                                                                                                                                                                                                                                                                                                                                                                                                                                         |
|         | 0.9169183571383985 0.8331819667935149 0.3086197639475451 T T T                                                                                                                                                                                                                                                                                                                                                                                                                                                                         |
|         | 0.7521261302136584 0.5005776845500601 0.4076614920739882 T T T                                                                                                                                                                                                                                                                                                                                                                                                                                                                         |
|         | 0.5841928988938316 0.4163137754931563 0.5100940488639714 T T T                                                                                                                                                                                                                                                                                                                                                                                                                                                                         |
| OT site | 1.0000000000000000<br>9.6381542603135379 -5.5645909566831619 -0.0000000000000020<br>0.0000000000000000 11.1291819133663008 0.0000000000000000<br>0.0000000000000000 0.0000000000000000 24.0869389807863001<br>C Pd O<br>1 80 1<br>Selective dynamics<br>Direct<br>0.4997889760339228 0.4976391539079697 0.4855653161529060 T T T<br>0.1666666667000030 0.3333333332999970 0.0263705027999990 F F F<br>0.0000000000000000 0.0000000000000000 0.1206844688000004 F F F<br>0.3333265130638182 0.1666455617108639 0.2146944474896079 T T T |

|                     |                     |                    |   |   |   |
|---------------------|---------------------|--------------------|---|---|---|
| 0.1666038672812816  | 0.3332943296357426  | 0.3089849220197655 | T | T | T |
| -0.0000315360879688 | 0.0000499055180683  | 0.4032097168669262 | T | T | T |
| 0.1666666667000030  | 0.0833333332999970  | 0.0263705027999990 | F | F | F |
| 0.0000000000000000  | 0.2500000000000000  | 0.1206844688000004 | F | F | F |
| 0.3337891554445818  | 0.4168837997589802  | 0.2154227082643649 | T | T | T |
| 0.1670783448245160  | 0.0839420441501169  | 0.3087307399006289 | T | T | T |
| -0.0004777203421632 | 0.2497530400061113  | 0.4035079595067769 | T | T | T |
| 0.4166666667000030  | 0.0833333332999970  | 0.0263705027999990 | F | F | F |
| 0.2500000000000000  | 0.2500000000000000  | 0.1206844688000004 | F | F | F |
| 0.0834498246866565  | 0.4166171348195547  | 0.2147102596123505 | T | T | T |
| 0.4168745749049106  | 0.0839448424998011  | 0.3087342387261305 | T | T | T |
| 0.2472081677810280  | 0.2470618573957681  | 0.4038057022058419 | T | T | T |
| 0.4166666667000030  | 0.3333333332999970  | 0.0263705027999990 | F | F | F |
| 0.2500000000000000  | 0.0000000000000000  | 0.1206844688000004 | F | F | F |
| 0.0834541366629262  | 0.1667940876607588  | 0.2147136541066024 | T | T | T |
| 0.4173626349611578  | 0.3347314121458155  | 0.3104693599576462 | T | T | T |
| 0.2496935043964242  | -0.0006140345572870 | 0.4034371356379068 | T | T | T |
| 0.6666666667000030  | 0.3333333332999970  | 0.0263705027999990 | F | F | F |
| 0.5000000000000000  | 0.0000000000000000  | 0.1206844688000004 | F | F | F |
| 0.8333276241304733  | 0.1666711972430267  | 0.2147748967589508 | T | T | T |
| 0.6667009432671551  | 0.3333099250101569  | 0.3089860629183837 | T | T | T |
| 0.5000958239906980  | 0.0000651105112290  | 0.4032084022983684 | T | T | T |
| 0.6666666667000030  | 0.0833333332999970  | 0.0263705027999990 | F | F | F |
| 0.5000000000000000  | 0.2500000000000000  | 0.1206844688000004 | F | F | F |
| 0.8331777796547494  | 0.4166179357738251  | 0.2147107406458590 | T | T | T |
| 0.6666258244956277  | 0.0832988477474560  | 0.3087298055986004 | T | T | T |
| 0.4998318867192104  | 0.2470378237996860  | 0.4038092125677157 | T | T | T |
| 0.9166666667000030  | 0.0833333332999970  | 0.0263705027999990 | F | F | F |
| 0.7500000000000000  | 0.2500000000000000  | 0.1206844688000004 | F | F | F |
| 0.5831006197256569  | 0.4168873605088049  | 0.2154186278924754 | T | T | T |
| 0.9166846858734942  | 0.0832998521380566  | 0.3087313612612949 | T | T | T |
| 0.7502356817749084  | 0.2497498507281679  | 0.4035076863715891 | T | T | T |
| 0.9166666667000030  | 0.3333333332999970  | 0.0263705027999990 | F | F | F |
| 0.7500000000000000  | 0.0000000000000000  | 0.1206844688000004 | F | F | F |
| 0.5833574351691170  | 0.1667981663765456  | 0.2147132576625181 | T | T | T |
| 0.9166819997417979  | 0.3333510939491512  | 0.3087263810187226 | T | T | T |
| 0.7502176592256895  | 0.0004372061790285  | 0.4035005561107595 | T | T | T |
| 0.1666666667000030  | 0.8333333332999970  | 0.0263705027999990 | F | F | F |
| 0.0000000000000000  | 0.5000000000000000  | 0.1206844688000004 | F | F | F |
| 0.3333604506044400  | 0.6666357707851821  | 0.2147284560258248 | T | T | T |
| 0.1666658651416382  | 0.8332915892265661  | 0.3087930469359039 | T | T | T |
| -0.0000632904614420 | 0.4998858409364659  | 0.4032063335032597 | T | T | T |
| 0.1666666667000030  | 0.5833333332999970  | 0.0263705027999990 | F | F | F |
| 0.0000000000000000  | 0.7500000000000000  | 0.1206844688000004 | F | F | F |
| 0.3333755810473492  | 0.9166560593988333  | 0.2147950325589086 | T | T | T |
| 0.1671125752217502  | 0.5830883365286975  | 0.3087361329736504 | T | T | T |
| 0.0005911470856479  | 0.7502898959114104  | 0.4034400582450746 | T | T | T |
| 0.4166666667000030  | 0.5833333332999970  | 0.0263705027999990 | F | F | F |
| 0.2500000000000000  | 0.7500000000000000  | 0.1206844688000004 | F | F | F |
| 0.0833125524404864  | 0.9166657499930251  | 0.2147973684531831 | T | T | T |
| 0.4174651191982057  | 0.5825353416569009  | 0.3105463716582116 | T | T | T |



|  |                    |                    |                    |   |   |   |
|--|--------------------|--------------------|--------------------|---|---|---|
|  | 0.2497019337126371 | 0.7502882161546864 | 0.4034461422078602 | T | T | T |
|  | 0.4166666667000030 | 0.8333333332999970 | 0.0263705027999990 | F | F | F |
|  | 0.2500000000000000 | 0.5000000000000000 | 0.1206844688000004 | F | F | F |
|  | 0.0833153009473592 | 0.6665936145969802 | 0.2147903186767314 | T | T | T |
|  | 0.4168975188962947 | 0.8328835594575732 | 0.3087335616576564 | T | T | T |
|  | 0.2472154980242333 | 0.5001632814063472 | 0.4038167042365586 | T | T | T |
|  | 0.6666666667000030 | 0.8333333332999970 | 0.0263705027999990 | F | F | F |
|  | 0.5000000000000000 | 0.5000000000000000 | 0.1206844688000004 | F | F | F |
|  | 0.8333050177056242 | 0.6666421376259219 | 0.2147034224972998 | T | T | T |
|  | 0.6666987021423170 | 0.8333715941902808 | 0.3089823404153001 | T | T | T |
|  | 0.4999989864615945 | 0.4999392301931621 | 0.4086766244512867 | T | T | T |
|  | 0.6666666667000030 | 0.5833333332999970 | 0.0263705027999990 | F | F | F |
|  | 0.5000000000000000 | 0.7500000000000000 | 0.1206844688000004 | F | F | F |
|  | 0.8331822328015956 | 0.9165271496831943 | 0.2147138382033642 | T | T | T |
|  | 0.6651715412140773 | 0.5825738151882788 | 0.3105105105000748 | T | T | T |
|  | 0.4998363940331527 | 0.7527594264700245 | 0.4038123210412618 | T | T | T |
|  | 0.9166666667000030 | 0.5833333332999970 | 0.0263705027999990 | F | F | F |
|  | 0.7500000000000000 | 0.7500000000000000 | 0.1206844688000004 | F | F | F |
|  | 0.5833634698701690 | 0.9165306774643945 | 0.2147134094615953 | T | T | T |
|  | 0.9160185191494326 | 0.5830955828362392 | 0.3087360510766162 | T | T | T |
|  | 0.7529248096619605 | 0.7527678051239184 | 0.4038089806891553 | T | T | T |
|  | 0.9166666667000030 | 0.8333333332999970 | 0.0263705027999990 | F | F | F |
|  | 0.7500000000000000 | 0.5000000000000000 | 0.1206844688000004 | F | F | F |
|  | 0.5831052241886926 | 0.6661908335943312 | 0.2154173853878939 | T | T | T |
|  | 0.9160347785885649 | 0.8329041870108391 | 0.3087314009910831 | T | T | T |
|  | 0.7529649786231937 | 0.5001649258599978 | 0.4038154106330321 | T | T | T |
|  | 0.4996535534377358 | 0.4964293161862561 | 0.5336522649843588 | T | T | T |

(8) CO on Pt(111)

|        |                    |                     |                     |   |   |   |
|--------|--------------------|---------------------|---------------------|---|---|---|
| H site | 1.0000000000000000 |                     |                     |   |   |   |
|        | 9.7149212688523594 | -5.6089124097279299 | 0.0000000000000000  |   |   |   |
|        | 0.0000000000000000 | 11.2178248194559007 | -0.0000000000000020 |   |   |   |
|        | 0.0000000000000000 | 0.0000000000000000  | 24.1593156105318982 |   |   |   |
|        | C                  | Pt                  | O                   |   |   |   |
|        | 1                  | 80                  | 1                   |   |   |   |
|        | Selective dynamics |                     |                     |   |   |   |
|        | Direct             |                     |                     |   |   |   |
|        | 0.5835731573031097 | 0.4161306510202992  | 0.4900286049669446  | T | T | T |
|        | 0.1666666667000030 | 0.3333333332999970  | 0.0528360781000003  | F | F | F |
|        | 0.0000000000000000 | 0.0000000000000000  | 0.1476164493000027  | F | F | F |
|        | 0.3337600748893678 | 0.1666655156451672  | 0.2415270162902090  | T | T | T |
|        | 0.1671545860519863 | 0.3335611222543053  | 0.3350658026098350  | T | T | T |
|        | 0.0004732361303684 | -0.0006375019264734 | 0.4310900783871529  | T | T | T |
|        | 0.1666666667000030 | 0.0833333332999970  | 0.0528360781000003  | F | F | F |
|        | 0.0000000000000000 | 0.2500000000000000  | 0.1476164493000027  | F | F | F |
|        | 0.3337730095015804 | 0.4170520560296917  | 0.2415444586969708  | T | T | T |
|        | 0.1671329111370092 | 0.0832338313080015  | 0.3350426084637385  | T | T | T |
|        | 0.0003679964179608 | 0.2499081914616785  | 0.4310741092550978  | T | T | T |
|        | 0.4166666667000030 | 0.0833333332999970  | 0.0528360781000003  | F | F | F |
|        | 0.2500000000000000 | 0.2500000000000000  | 0.1476164493000027  | F | F | F |
|        | 0.0834616273586755 | 0.4168463774295494  | 0.2414749611038239  | T | T | T |
|        | 0.4179616451004543 | 0.0855999918851912  | 0.3361352878718453  | T | T | T |

|                    |                     |                    |   |   |   |
|--------------------|---------------------|--------------------|---|---|---|
| 0.2450503236254450 | 0.2469349596066322  | 0.4307189646314868 | T | T | T |
| 0.4166666667000030 | 0.3333333332999970  | 0.0528360781000003 | F | F | F |
| 0.2500000000000000 | 0.0000000000000000  | 0.1476164493000027 | F | F | F |
| 0.0835748278151082 | 0.1667818778531588  | 0.2413856849013344 | T | T | T |
| 0.4175359619151263 | 0.3335628944784676  | 0.3365349563146500 | T | T | T |
| 0.2503556847905317 | -0.0005880907579142 | 0.4310069420142590 | T | T | T |
| 0.6666666667000030 | 0.3333333332999970  | 0.0528360781000003 | F | F | F |
| 0.5000000000000000 | 0.0000000000000000  | 0.1476164493000027 | F | F | F |
| 0.8332352320406994 | 0.1667600436504947  | 0.2413745780155756 | T | T | T |
| 0.6664035550811287 | 0.3335650203510239  | 0.3364849140614994 | T | T | T |
| 0.5001496567173287 | -0.0004911069112289 | 0.4309871132173703 | T | T | T |
| 0.6666666667000030 | 0.0833333332999970  | 0.0528360781000003 | F | F | F |
| 0.5000000000000000 | 0.2500000000000000  | 0.1476164493000027 | F | F | F |
| 0.8333364365512541 | 0.4170775575964855  | 0.2415383047934453 | T | T | T |
| 0.6664123107346294 | 0.0831933000155799  | 0.3350307329760328 | T | T | T |
| 0.4986231996176370 | 0.2465732116751531  | 0.4356805348549943 | T | T | T |
| 0.9166666667000030 | 0.0833333332999970  | 0.0528360781000003 | F | F | F |
| 0.7500000000000000 | 0.2500000000000000  | 0.1476164493000027 | F | F | F |
| 0.5833492665014165 | 0.4166595925851708  | 0.2421860722438527 | T | T | T |
| 0.9167695567499939 | 0.0832083642715346  | 0.3352578859651801 | T | T | T |
| 0.7527354013741493 | 0.2470799238083229  | 0.4306582925656870 | T | T | T |
| 0.9166666667000030 | 0.3333333332999970  | 0.0528360781000003 | F | F | F |
| 0.7500000000000000 | 0.0000000000000000  | 0.1476164493000027 | F | F | F |
| 0.5829321104856113 | 0.1666650617903276  | 0.2415378335343613 | T | T | T |
| 0.9167496826539261 | 0.3335295166949087  | 0.3350275219296120 | T | T | T |
| 0.7499109254882400 | -0.0005583521205504 | 0.4310843799377108 | T | T | T |
| 0.1666666667000030 | 0.8333333332999970  | 0.0528360781000003 | F | F | F |
| 0.0000000000000000 | 0.5000000000000000  | 0.1476164493000027 | F | F | F |
| 0.3332399762723807 | 0.6667683719145381  | 0.2413382909621572 | T | T | T |
| 0.1668572566107250 | 0.8330599744700723  | 0.3351658336973610 | T | T | T |
| 0.0002467099886485 | 0.4997019566341152  | 0.4309880043288516 | T | T | T |
| 0.1666666667000030 | 0.5833333332999970  | 0.0528360781000003 | F | F | F |
| 0.0000000000000000 | 0.7500000000000000  | 0.1476164493000027 | F | F | F |
| 0.3331947853155197 | 0.9162991971544383  | 0.2412947311672860 | T | T | T |
| 0.1669670780020731 | 0.5833505939802620  | 0.3351886903404696 | T | T | T |
| 0.0002801855575103 | 0.7493699487373829  | 0.4310251792051223 | T | T | T |
| 0.4166666667000030 | 0.5833333332999970  | 0.0528360781000003 | F | F | F |
| 0.2500000000000000 | 0.7500000000000000  | 0.1476164493000027 | F | F | F |
| 0.0834636090583243 | 0.9165403621781985  | 0.2414786336445905 | T | T | T |
| 0.4181088355760819 | 0.5818497663349688  | 0.3362221799720452 | T | T | T |
| 0.2503078068941582 | 0.7494986690433172  | 0.4311430908151174 | T | T | T |
| 0.4166666667000030 | 0.8333333332999970  | 0.0528360781000003 | F | F | F |
| 0.2500000000000000 | 0.5000000000000000  | 0.1476164493000027 | F | F | F |
| 0.0837091156046727 | 0.6668049156977147  | 0.2412989643431958 | T | T | T |
| 0.4165750223350880 | 0.8329803884122037  | 0.3351907196005109 | T | T | T |
| 0.2503399701437594 | 0.4996422816756859  | 0.4310886219507631 | T | T | T |
| 0.6666666667000030 | 0.8333333332999970  | 0.0528360781000003 | F | F | F |
| 0.5000000000000000 | 0.5000000000000000  | 0.1476164493000027 | F | F | F |
| 0.8333420989767957 | 0.6662544747743558  | 0.2415277744974482 | T | T | T |
| 0.6663929929668055 | 0.8327905759415470  | 0.3350712565655102 | T | T | T |
| 0.4986584472391897 | 0.5010652643886975  | 0.4358992189758655 | T | T | T |

|         |                                                                 |
|---------|-----------------------------------------------------------------|
|         | 0.666666667000030 0.583333332999970 0.0528360781000003 F F F    |
|         | 0.500000000000000 0.750000000000000 0.1476164493000027 F F F    |
|         | 0.8332289819512084 0.9164307108941518 0.2413933696346369 T T T  |
|         | 0.6664315488723987 0.5824669374406383 0.3365457638662285 T T T  |
|         | 0.5001254067876042 0.7493667113781431 0.4310754110624935 T T T  |
|         | 0.916666667000030 0.583333332999970 0.0528360781000003 F F F    |
|         | 0.750000000000000 0.750000000000000 0.1476164493000027 F F F    |
|         | 0.5831675576226526 0.9165350851540617 0.2414779967304858 T T T  |
|         | 0.9143564826002252 0.5819954273420161 0.3361293569181432 T T T  |
|         | 0.7528970232428470 0.7548264531450931 0.4307311581006333 T T T  |
|         | 0.916666667000030 0.833333332999970 0.0528360781000003 F F F    |
|         | 0.750000000000000 0.500000000000000 0.1476164493000027 F F F    |
|         | 0.5829658680601082 0.6662300135415224 0.2415478361405134 T T T  |
|         | 0.9167510812055750 0.8328340117539628 0.3350520627165106 T T T  |
|         | 0.7531581619474778 0.5011468907071315 0.4356707446626842 T T T  |
|         | 0.5837867464876054 0.4158583671017952 0.5395899145860444 T T T  |
| OT site | 1.000000000000000                                               |
|         | 9.7149212688523594 -5.6089124097279299 0.000000000000000        |
|         | 0.000000000000000 11.2178248194559007 -0.000000000000020        |
|         | 0.000000000000000 0.000000000000000 24.1593156105318982         |
|         | C Pt O                                                          |
|         | 1 80 1                                                          |
|         | Selective dynamics                                              |
|         | Direct                                                          |
|         | 0.5014296588607464 0.4985209341593655 0.5149256343444657 T T T  |
|         | 0.166666667000030 0.333333332999970 0.0528360781000003 F F F    |
|         | 0.000000000000000 0.000000000000000 0.1476164493000027 F F F    |
|         | 0.3341904651329254 0.1684017185042602 0.2410756413978779 T T T  |
|         | 0.1661279867990694 0.3330592625130167 0.3354946693627265 T T T  |
|         | 0.0002360066124940 -0.0002459872663328 0.4307433500071445 T T T |
|         | 0.166666667000030 0.083333332999970 0.0528360781000003 F F F    |
|         | 0.000000000000000 0.250000000000000 0.1476164493000027 F F F    |
|         | 0.3344006306064702 0.4172403712213101 0.2427309609094120 T T T  |
|         | 0.1677266391952936 0.0840674462592456 0.3346610657667329 T T T  |
|         | -0.0011381603281529 0.2493634615669560 0.4313025497342643 T T T |
|         | 0.416666667000030 0.083333332999970 0.0528360781000003 F F F    |
|         | 0.250000000000000 0.250000000000000 0.1476164493000027 F F F    |
|         | 0.0836943621144117 0.4166710031850627 0.2413013599159541 T T T  |
|         | 0.4163971299668829 0.0840998607171984 0.3346383516965509 T T T  |
|         | 0.2450460459742331 0.2451354377959856 0.4310206309992692 T T T  |
|         | 0.416666667000030 0.333333332999970 0.0528360781000003 F F F    |
|         | 0.250000000000000 0.000000000000000 0.1476164493000027 F F F    |
|         | 0.0836966404825829 0.1670198352699860 0.2413005656849403 T T T  |
|         | 0.4178178998702120 0.3356087168328883 0.3383319652361033 T T T  |
|         | 0.2496185477579427 -0.0009060477520553 0.4309766259781860 T T T |
|         | 0.666666667000030 0.333333332999970 0.0528360781000003 F F F    |
|         | 0.500000000000000 0.000000000000000 0.1476164493000027 F F F    |
|         | 0.8333420759898185 0.1666609489189961 0.2414947639985307 T T T  |
|         | 0.6669226329871568 0.3330724974662477 0.3354775079995372 T T T  |
|         | 0.4996358139991236 -0.0002774685128336 0.4307483258087615 T T T |
|         | 0.666666667000030 0.083333332999970 0.0528360781000003 F F F    |

|                    |                    |                    |       |
|--------------------|--------------------|--------------------|-------|
| 0.5000000000000000 | 0.2500000000000000 | 0.1476164493000027 | F F F |
| 0.8329804066697455 | 0.4166595141468060 | 0.2412913389036288 | T T T |
| 0.6662987021954671 | 0.0831448754343653 | 0.3351251418751001 | T T T |
| 0.5001602327102616 | 0.2450301363568592 | 0.4309904821742280 | T T T |
| 0.9166666667000030 | 0.0833333329999970 | 0.0528360781000003 | F F F |
| 0.7500000000000000 | 0.2500000000000000 | 0.1476164493000027 | F F F |
| 0.5827909116894079 | 0.4172094160477051 | 0.2427006040866245 | T T T |
| 0.9168870333494378 | 0.0831131284645448 | 0.3351231802378504 | T T T |
| 0.7506655092793576 | 0.2493274477494007 | 0.4313018054821600 | T T T |
| 0.9166666667000030 | 0.3333333329999970 | 0.0528360781000003 | F F F |
| 0.7500000000000000 | 0.0000000000000000 | 0.1476164493000027 | F F F |
| 0.5833356578121012 | 0.1670180187246108 | 0.2412914810112433 | T T T |
| 0.9168514548892038 | 0.3336986365469574 | 0.3351244532291273 | T T T |
| 0.7506253096334735 | 0.0011239846673414 | 0.4313031609574797 | T T T |
| 0.1666666667000030 | 0.8333333329999970 | 0.0528360781000003 | F F F |
| 0.0000000000000000 | 0.5000000000000000 | 0.1476164493000027 | F F F |
| 0.3342313477153657 | 0.6657709123145832 | 0.2411400815452835 | T T T |
| 0.1667094161293815 | 0.8332833075843463 | 0.3352124637416776 | T T T |
| 0.0002733460350837 | 0.5003578234791742 | 0.4307455017889766 | T T T |
| 0.1666666667000030 | 0.5833333329999970 | 0.0528360781000003 | F F F |
| 0.0000000000000000 | 0.7500000000000000 | 0.1476164493000027 | F F F |
| 0.3333113087071050 | 0.9166452677064394 | 0.2414277044716572 | T T T |
| 0.1677671538571543 | 0.5835634525021741 | 0.3346851551125725 | T T T |
| 0.0009030778461859 | 0.7503754358290734 | 0.4309811534256734 | T T T |
| 0.4166666667000030 | 0.5833333329999970 | 0.0528360781000003 | F F F |
| 0.2500000000000000 | 0.7500000000000000 | 0.1476164493000027 | F F F |
| 0.0833575562804076 | 0.9166693873693063 | 0.2414287733625649 | T T T |
| 0.4179605602547665 | 0.5820364288237233 | 0.3384733544051020 | T T T |
| 0.2496385222510677 | 0.7503531184145910 | 0.4310120345213186 | T T T |
| 0.4166666667000030 | 0.8333333329999970 | 0.0528360781000003 | F F F |
| 0.2500000000000000 | 0.5000000000000000 | 0.1476164493000027 | F F F |
| 0.0833588038533299 | 0.6666886782118577 | 0.2414275298893650 | T T T |
| 0.4164358130741131 | 0.8322301158411781 | 0.3346860947970656 | T T T |
| 0.2451202635350258 | 0.4997994821554791 | 0.4310633121358622 | T T T |
| 0.6666666667000030 | 0.8333333329999970 | 0.0528360781000003 | F F F |
| 0.5000000000000000 | 0.5000000000000000 | 0.1476164493000027 | F F F |
| 0.8316103646691748 | 0.6658084054857920 | 0.2410780611985198 | T T T |
| 0.6669409594968636 | 0.8338689659048950 | 0.3354956998555360 | T T T |
| 0.5000796780472850 | 0.4999047948414388 | 0.4387382103552376 | T T T |
| 0.6666666667000030 | 0.5833333329999970 | 0.0528360781000003 | F F F |
| 0.5000000000000000 | 0.7500000000000000 | 0.1476164493000027 | F F F |
| 0.8329837049538008 | 0.9163008129293989 | 0.2413007070464530 | T T T |
| 0.6643858056146364 | 0.5821767977923269 | 0.3383291030072096 | T T T |
| 0.5001967111561610 | 0.7548787095059174 | 0.4310661625423344 | T T T |
| 0.9166666667000030 | 0.5833333329999970 | 0.0528360781000003 | F F F |
| 0.7500000000000000 | 0.7500000000000000 | 0.1476164493000027 | F F F |
| 0.5833271203760123 | 0.9163044325749033 | 0.2413023820207311 | T T T |
| 0.9158960499658253 | 0.5835971287637385 | 0.3346413240262719 | T T T |
| 0.7548502979254342 | 0.7549369807987594 | 0.4310216728475711 | T T T |
| 0.9166666667000030 | 0.8333333329999970 | 0.0528360781000003 | F F F |
| 0.7500000000000000 | 0.5000000000000000 | 0.1476164493000027 | F F F |

|                           |                    |                     |                     |   |   |   |
|---------------------------|--------------------|---------------------|---------------------|---|---|---|
|                           | 0.5827677929961929 | 0.6656025205132338  | 0.2427307025794282  | T | T | T |
|                           | 0.9159292644091644 | 0.8322691045352452  | 0.3346621337180758  | T | T | T |
|                           | 0.7549565212140444 | 0.4998305950595230  | 0.4309920377168659  | T | T | T |
|                           | 0.5024491566769353 | 0.4974637325559024  | 0.5628530622054494  | T | T | T |
| (9) CO on nX/M(111)       |                    |                     |                     |   |   |   |
| 2Cu/Ni(111) <sup>PC</sup> | 1.000000000000000  |                     |                     |   |   |   |
|                           | 8.6224000674449712 | -4.9781450000000014 | 0.0000000000000000  |   |   |   |
|                           | 0.0000000000000000 | 9.9562900000000010  | 0.0000000000000000  |   |   |   |
|                           | 0.0000000000000000 | 0.0000000000000000  | 23.1292800000000014 |   |   |   |
|                           | Ni                 | C                   | Cu                  | O |   |   |
|                           | 78                 | 1                   | 2                   | 1 |   |   |
|                           | Selective dynamics |                     |                     |   |   |   |
|                           | Direct             |                     |                     |   |   |   |
|                           | 0.0000000000000000 | 0.0000000000000000  | 0.1392870000000030  | F | F | F |
|                           | 0.0002198745097119 | 0.9999609818084402  | 0.4012163595785791  | T | T | T |
|                           | 0.1666669999999968 | 0.0833330000000032  | 0.0514190000000028  | F | F | F |
|                           | 0.1673012787329708 | 0.0834659464892771  | 0.3141993936131457  | T | T | T |
|                           | 0.0836591455608749 | 0.1670470001775787  | 0.2270305860504970  | T | T | T |
|                           | 0.2500000000000000 | 0.0000000000000000  | 0.1392870000000030  | F | F | F |
|                           | 0.2486740129885585 | 0.0015774504543078  | 0.4006607900739575  | T | T | T |
|                           | 0.4166669999999968 | 0.0833330000000032  | 0.0514190000000028  | F | F | F |
|                           | 0.4166776601028080 | 0.0829976352693331  | 0.3145143067974516  | T | T | T |
|                           | 0.3333646483217609 | 0.1669680502907746  | 0.2266139301014776  | T | T | T |
|                           | 0.5000000000000000 | 0.0000000000000000  | 0.1392870000000030  | F | F | F |
|                           | 0.5006081470065661 | 0.0012674345558067  | 0.4041624233174947  | T | T | T |
|                           | 0.6666669999999968 | 0.0833330000000032  | 0.0514190000000028  | F | F | F |
|                           | 0.6662138709199049 | 0.0828250402715338  | 0.3147633149578338  | T | T | T |
|                           | 0.5835912746910228 | 0.1668635796993748  | 0.2269369230453297  | T | T | T |
|                           | 0.7500000000000000 | 0.0000000000000000  | 0.1392870000000030  | F | F | F |
|                           | 0.7538299966305343 | 0.0025630086580643  | 0.4010301685360669  | T | T | T |
|                           | 0.9166669999999968 | 0.0833330000000032  | 0.0514190000000028  | F | F | F |
|                           | 0.9167171200031947 | 0.0834582878598517  | 0.3144017778874025  | T | T | T |
|                           | 0.8338398635655053 | 0.1669588696716723  | 0.2267289016711946  | T | T | T |
|                           | 0.0000000000000000 | 0.2500000000000000  | 0.1392870000000030  | F | F | F |
|                           | 0.9981492448510617 | 0.2489339184426432  | 0.4011121694220808  | T | T | T |
|                           | 0.1666669999999968 | 0.3333330000000032  | 0.0514190000000028  | F | F | F |
|                           | 0.1675034400613670 | 0.3343612142662524  | 0.3150032649007438  | T | T | T |
|                           | 0.0836773572772435 | 0.4166245389929845  | 0.2269573048717592  | T | T | T |
|                           | 0.2500000000000000 | 0.2500000000000000  | 0.1392870000000030  | F | F | F |
|                           | 0.2481537280350194 | 0.2459695589757916  | 0.4010164050022245  | T | T | T |
|                           | 0.4166669999999968 | 0.3333330000000032  | 0.0514190000000028  | F | F | F |
|                           | 0.4168566054748099 | 0.3338737433603379  | 0.3149051039393123  | T | T | T |
|                           | 0.3332258981169458 | 0.4166728159600511  | 0.2271822579814007  | T | T | T |
|                           | 0.5000000000000000 | 0.2500000000000000  | 0.1392870000000030  | F | F | F |
|                           | 0.5008810420624170 | 0.2487529855366802  | 0.4009544449734861  | T | T | T |
|                           | 0.6666669999999968 | 0.3333330000000032  | 0.0514190000000028  | F | F | F |
|                           | 0.6666869262600891 | 0.3333960501874173  | 0.3143550281109451  | T | T | T |
|                           | 0.5833564745799825 | 0.4168385680521912  | 0.2270079721225861  | T | T | T |
|                           | 0.7500000000000000 | 0.2500000000000000  | 0.1392870000000030  | F | F | F |
|                           | 0.7502023953533346 | 0.2507429915726041  | 0.4011772476999268  | T | T | T |
|                           | 0.9166669999999968 | 0.3333330000000032  | 0.0514190000000028  | F | F | F |

|                           |                    |                     |                     |   |   |   |
|---------------------------|--------------------|---------------------|---------------------|---|---|---|
|                           | 0.9171535864801487 | 0.3334656124964521  | 0.3144834317507041  | T | T | T |
|                           | 0.8334825050108876 | 0.4167614692121480  | 0.2268044718495124  | T | T | T |
|                           | 0.0000000000000000 | 0.5000000000000000  | 0.1392870000000030  | F | F | F |
|                           | 0.9976447592030330 | 0.5000079468026022  | 0.4007294157187016  | T | T | T |
|                           | 0.1666669999999968 | 0.5833330000000032  | 0.0514190000000028  | F | F | F |
|                           | 0.1678113008552651 | 0.5841510824581284  | 0.3147639562700957  | T | T | T |
|                           | 0.0835784960450418 | 0.6671519631909307  | 0.2267517575049569  | T | T | T |
|                           | 0.2500000000000000 | 0.5000000000000000  | 0.1392870000000030  | F | F | F |
|                           | 0.4166669999999968 | 0.5833330000000032  | 0.0514190000000028  | F | F | F |
|                           | 0.4170274167536163 | 0.5844522208328444  | 0.3153449278478187  | T | T | T |
|                           | 0.3333289673443737 | 0.6666631561683101  | 0.2269267792377540  | T | T | T |
|                           | 0.5000000000000000 | 0.5000000000000000  | 0.1392870000000030  | F | F | F |
|                           | 0.6666669999999968 | 0.5833330000000032  | 0.0514190000000028  | F | F | F |
|                           | 0.6663560303145484 | 0.5838094470252544  | 0.3147221754657921  | T | T | T |
|                           | 0.5835646388326923 | 0.6671312013466796  | 0.2270551870630548  | T | T | T |
|                           | 0.7500000000000000 | 0.5000000000000000  | 0.1392870000000030  | F | F | F |
|                           | 0.7522850435517783 | 0.5002026233882128  | 0.4009198992926808  | T | T | T |
|                           | 0.9166669999999968 | 0.5833330000000032  | 0.0514190000000028  | F | F | F |
|                           | 0.9171094204533301 | 0.5839791877729649  | 0.3140253028691745  | T | T | T |
|                           | 0.8334007831097489 | 0.6667442862202461  | 0.2266553876962862  | T | T | T |
|                           | 0.0000000000000000 | 0.7500000000000000  | 0.1392870000000030  | F | F | F |
|                           | 0.0000955318777367 | 0.7498214219823979  | 0.4007105727587976  | T | T | T |
|                           | 0.1666669999999968 | 0.8333330000000032  | 0.0514190000000028  | F | F | F |
|                           | 0.1672744294052735 | 0.8331400611529292  | 0.3141908886337416  | T | T | T |
|                           | 0.0832886401555257 | 0.9171093696544672  | 0.2266539970534978  | T | T | T |
|                           | 0.2500000000000000 | 0.7500000000000000  | 0.1392870000000030  | F | F | F |
|                           | 0.2499918198112581 | 0.7522029301354013  | 0.4037318653367213  | T | T | T |
|                           | 0.4166669999999968 | 0.8333330000000032  | 0.0514190000000028  | F | F | F |
|                           | 0.4166708330883782 | 0.8330721574045705  | 0.3140747065077979  | T | T | T |
|                           | 0.3333371203458598 | 0.9170620017515098  | 0.2268496214016004  | T | T | T |
|                           | 0.5000000000000000 | 0.7500000000000000  | 0.1392870000000030  | F | F | F |
|                           | 0.5033107980070546 | 0.7549533232200618  | 0.4038445413029959  | T | T | T |
|                           | 0.6666669999999968 | 0.8333330000000032  | 0.0514190000000028  | F | F | F |
|                           | 0.6664690313806001 | 0.8332821395541896  | 0.3146136723457472  | T | T | T |
|                           | 0.5840211494650579 | 0.9169734812669844  | 0.2269754546851728  | T | T | T |
|                           | 0.7500000000000000 | 0.7500000000000000  | 0.1392870000000030  | F | F | F |
|                           | 0.7525449219795874 | 0.7524295336088929  | 0.4008961356881579  | T | T | T |
|                           | 0.9166669999999968 | 0.8333330000000032  | 0.0514190000000028  | F | F | F |
|                           | 0.9167173923816389 | 0.8330949093612049  | 0.3142324608815111  | T | T | T |
|                           | 0.8338318389097265 | 0.9169597985748692  | 0.2267123535853499  | T | T | T |
|                           | 0.4154759043346890 | 0.8335903492933482  | 0.4607045537746863  | T | T | T |
|                           | 0.2485194237646984 | 0.4986179689004954  | 0.4057513685570824  | T | T | T |
|                           | 0.5015276867089197 | 0.5005195840857813  | 0.4058296836583096  | T | T | T |
|                           | 0.4140312448562484 | 0.8332712822150371  | 0.5123942017513662  | T | T | T |
| 3Cu/Ni(111) <sup>PC</sup> | 1.0000000000000000 |                     |                     |   |   |   |
|                           | 8.6224000674449712 | -4.9781450000000014 | 0.0000000000000000  |   |   |   |
|                           | 0.0000000000000000 | 9.9562900000000010  | 0.0000000000000000  |   |   |   |
|                           | 0.0000000000000000 | 0.0000000000000000  | 23.1292800000000014 |   |   |   |
|                           | Ni C Cu O          |                     |                     |   |   |   |
|                           | 77 1 3 1           |                     |                     |   |   |   |
|                           | Selective dynamics |                     |                     |   |   |   |

| Direct              |                    |                    |       |
|---------------------|--------------------|--------------------|-------|
| 0.0000000000000000  | 0.0000000000000000 | 0.1392870000000030 | F F F |
| 0.0016136366108401  | 0.0018419165279904 | 0.4007415147814012 | T T T |
| 0.1666669999999968  | 0.0833330000000032 | 0.0514190000000028 | F F F |
| 0.1671066372338271  | 0.0831822936770477 | 0.3140364829932297 | T T T |
| 0.0832597083230183  | 0.1667218846624179 | 0.2267833765224198 | T T T |
| 0.2500000000000000  | 0.0000000000000000 | 0.1392870000000030 | F F F |
| 0.2493688069992477  | 0.9999216241832053 | 0.4005470475152436 | T T T |
| 0.4166669999999968  | 0.0833330000000032 | 0.0514190000000028 | F F F |
| 0.4168857987327468  | 0.0841004308928409 | 0.3143005803384497 | T T T |
| 0.3333854980042719  | 0.1666232604024526 | 0.2267227995300777 | T T T |
| 0.5000000000000000  | 0.0000000000000000 | 0.1392870000000030 | F F F |
| 0.4984057878624212  | 0.9987680260994625 | 0.4004772252465882 | T T T |
| 0.6666669999999968  | 0.0833330000000032 | 0.0514190000000028 | F F F |
| 0.6664342870364545  | 0.0836576580896514 | 0.3144059130823422 | T T T |
| 0.5830507503305221  | 0.1662677753227141 | 0.2267346301682985 | T T T |
| 0.7500000000000000  | 0.0000000000000000 | 0.1392870000000030 | F F F |
| 0.7523581406006570  | 0.0046873962873317 | 0.4006808891895930 | T T T |
| 0.9166669999999968  | 0.0833330000000032 | 0.0514190000000028 | F F F |
| 0.9160177324358173  | 0.0829725642300947 | 0.3142688600121120 | T T T |
| 0.8332004947084419  | 0.1665829722537054 | 0.2267882124976954 | T T T |
| 0.0000000000000000  | 0.2500000000000000 | 0.1392870000000030 | F F F |
| -0.0006017839058249 | 0.2493919808495224 | 0.4012499393603836 | T T T |
| 0.1666669999999968  | 0.3333330000000032 | 0.0514190000000028 | F F F |
| 0.1669085584124897  | 0.3332549623156855 | 0.3142844198815160 | T T T |
| 0.0839070409633283  | 0.4167524982108034 | 0.2267376111972439 | T T T |
| 0.2500000000000000  | 0.2500000000000000 | 0.1392870000000030 | F F F |
| 0.2469793645851531  | 0.2472677052289396 | 0.4008651559546804 | T T T |
| 0.4166669999999968  | 0.3333330000000032 | 0.0514190000000028 | F F F |
| 0.4171629537802035  | 0.3331532609513854 | 0.3148130096479350 | T T T |
| 0.3333080085819035  | 0.4168020791439648 | 0.2268850180403084 | T T T |
| 0.5000000000000000  | 0.2500000000000000 | 0.1392870000000030 | F F F |
| 0.4997598960621268  | 0.2480973379360983 | 0.4039906143222044 | T T T |
| 0.6666669999999968  | 0.3333330000000032 | 0.0514190000000028 | F F F |
| 0.6661050653180910  | 0.3331464434718902 | 0.3137056329519270 | T T T |
| 0.5829938420389998  | 0.4166698588388653 | 0.2268435836710758 | T T T |
| 0.7500000000000000  | 0.2500000000000000 | 0.1392870000000030 | F F F |
| 0.7500076841570785  | 0.2493107830424450 | 0.4039369440105470 | T T T |
| 0.9166669999999968  | 0.3333330000000032 | 0.0514190000000028 | F F F |
| 0.9156309716718228  | 0.3329294281595571 | 0.3146269768304388 | T T T |
| 0.8335439440238488  | 0.4167661440771954 | 0.2268328234657236 | T T T |
| 0.0000000000000000  | 0.5000000000000000 | 0.1392870000000030 | F F F |
| 0.0026581606631350  | 0.5013328879361598 | 0.4007482023435978 | T T T |
| 0.1666669999999968  | 0.5833330000000032 | 0.0514190000000028 | F F F |
| 0.1668614958861717  | 0.5835452621275975 | 0.3143403984919753 | T T T |
| 0.0836854783926991  | 0.6668177780447334 | 0.2265921066677408 | T T T |
| 0.2500000000000000  | 0.5000000000000000 | 0.1392870000000030 | F F F |
| 0.4166669999999968  | 0.5833330000000032 | 0.0514190000000028 | F F F |
| 0.4170704165514387  | 0.5831892053387994 | 0.3151013331157884 | T T T |
| 0.3333722185857504  | 0.6667441976176416 | 0.2272279280843648 | T T T |
| 0.5000000000000000  | 0.5000000000000000 | 0.1392870000000030 | F F F |

|                           |                    |                     |                     |   |   |   |
|---------------------------|--------------------|---------------------|---------------------|---|---|---|
|                           | 0.666666999999968  | 0.583333000000032   | 0.051419000000028   | F | F | F |
|                           | 0.6664016820829671 | 0.5828261838586783  | 0.3152696007727945  | T | T | T |
|                           | 0.5832902077560197 | 0.6671199419943236  | 0.2272127357950570  | T | T | T |
|                           | 0.7500000000000000 | 0.5000000000000000  | 0.1392870000000030  | F | F | F |
|                           | 0.7514992265706729 | 0.4973893679725470  | 0.4036410525998167  | T | T | T |
|                           | 0.916666999999968  | 0.583333000000032   | 0.051419000000028   | F | F | F |
|                           | 0.9155214585748092 | 0.5831125869968078  | 0.3143819133155044  | T | T | T |
|                           | 0.8331980290412087 | 0.6666079873939573  | 0.2269308987600917  | T | T | T |
|                           | 0.0000000000000000 | 0.7500000000000000  | 0.1392870000000030  | F | F | F |
|                           | 0.0019615540756649 | 0.7500001006858078  | 0.4006040164532195  | T | T | T |
|                           | 0.166666999999968  | 0.833333000000032   | 0.051419000000028   | F | F | F |
|                           | 0.1666840278653510 | 0.8334274621951162  | 0.3138271177617809  | T | T | T |
|                           | 0.0832928427770896 | 0.9165977753925520  | 0.2266588531229698  | T | T | T |
|                           | 0.2500000000000000 | 0.7500000000000000  | 0.1392870000000030  | F | F | F |
|                           | 0.2476166139826009 | 0.7499073599062007  | 0.4008845788935896  | T | T | T |
|                           | 0.416666999999968  | 0.833333000000032   | 0.051419000000028   | F | F | F |
|                           | 0.4171123089078050 | 0.8333123380146742  | 0.3147203742399873  | T | T | T |
|                           | 0.3329844685719938 | 0.9162968393240474  | 0.2265748375368804  | T | T | T |
|                           | 0.5000000000000000 | 0.7500000000000000  | 0.1392870000000030  | F | F | F |
|                           | 0.666666999999968  | 0.833333000000032   | 0.051419000000028   | F | F | F |
|                           | 0.6663903740229143 | 0.8331642616988878  | 0.3151421197739617  | T | T | T |
|                           | 0.5829148265337941 | 0.9159723099263236  | 0.2267777461110376  | T | T | T |
|                           | 0.7500000000000000 | 0.7500000000000000  | 0.1392870000000030  | F | F | F |
|                           | 0.916666999999968  | 0.833333000000032   | 0.051419000000028   | F | F | F |
|                           | 0.9157477609247079 | 0.8324363324912397  | 0.3144575113406264  | T | T | T |
|                           | 0.8330503965165900 | 0.9163159976078752  | 0.2269072553091309  | T | T | T |
|                           | 0.2449245625560613 | 0.4969426305448437  | 0.4007790865767764  | T | T | T |
|                           | 0.6661791147681951 | 0.3319452721720029  | 0.4608423020067738  | T | T | T |
|                           | 0.4987598566525851 | 0.7505022703438327  | 0.4060544963086176  | T | T | T |
|                           | 0.7521757325379564 | 0.7509345777470073  | 0.4055825216774780  | T | T | T |
|                           | 0.4974485462267944 | 0.4983577716780734  | 0.4057275648633605  | T | T | T |
|                           | 0.6669256563784243 | 0.3313801403976782  | 0.5125084883303238  | T | T | T |
| 4Cu/Ni(111) <sup>PC</sup> | 1.0000000000000000 |                     |                     |   |   |   |
|                           | 8.6224000674449712 | -4.9781450000000014 | 0.0000000000000000  |   |   |   |
|                           | 0.0000000000000000 | 9.9562900000000010  | 0.0000000000000000  |   |   |   |
|                           | 0.0000000000000000 | 0.0000000000000000  | 23.1292800000000014 |   |   |   |
|                           | Ni                 | C                   | Cu                  | O |   |   |
|                           | 76                 | 1                   | 4                   | 1 |   |   |
|                           | Selective dynamics |                     |                     |   |   |   |
|                           | Direct             |                     |                     |   |   |   |
|                           | 0.0000000000000000 | 0.0000000000000000  | 0.1392870000000030  | F | F | F |
|                           | 0.0018441892787786 | 0.0022927205684771  | 0.4008085799488251  | T | T | T |
|                           | 0.166666999999968  | 0.083333000000032   | 0.051419000000028   | F | F | F |
|                           | 0.1672580567135758 | 0.0836748165077584  | 0.3140282782988363  | T | T | T |
|                           | 0.0834125649723829 | 0.1665895668142234  | 0.2267695905699340  | T | T | T |
|                           | 0.2500000000000000 | 0.0000000000000000  | 0.1392870000000030  | F | F | F |
|                           | 0.2497928632451292 | 0.0005277789909704  | 0.4008245791216293  | T | T | T |
|                           | 0.416666999999968  | 0.083333000000032   | 0.051419000000028   | F | F | F |
|                           | 0.4170569616242260 | 0.0843906223171719  | 0.3144909751338622  | T | T | T |
|                           | 0.3334064766169519 | 0.1666964093366167  | 0.2268268533880588  | T | T | T |
|                           | 0.5000000000000000 | 0.0000000000000000  | 0.1392870000000030  | F | F | F |



|                    |                    |                    |   |   |   |
|--------------------|--------------------|--------------------|---|---|---|
| 0.4987949334954771 | 0.9995397544631124 | 0.4006715484375303 | T | T | T |
| 0.6666669999999968 | 0.0833330000000032 | 0.0514190000000028 | F | F | F |
| 0.6667470647246679 | 0.0841050250890468 | 0.3145792984249915 | T | T | T |
| 0.5832414026420217 | 0.1665432909376225 | 0.2268814402850856 | T | T | T |
| 0.7500000000000000 | 0.0000000000000000 | 0.1392870000000030 | F | F | F |
| 0.7528819033920359 | 0.0054799913119540 | 0.4008000200346111 | T | T | T |
| 0.9166669999999968 | 0.0833330000000032 | 0.0514190000000028 | F | F | F |
| 0.9166074195688462 | 0.0835075572187962 | 0.3141979758182336 | T | T | T |
| 0.8333343159079746 | 0.1667214202081604 | 0.2268809984958197 | T | T | T |
| 0.0000000000000000 | 0.2500000000000000 | 0.1392870000000030 | F | F | F |
| 0.9984286821723268 | 0.2487840679312407 | 0.4010793885673651 | T | T | T |
| 0.1666669999999968 | 0.3333330000000032 | 0.0514190000000028 | F | F | F |
| 0.1674109134710326 | 0.3339573392568487 | 0.3148347225699978 | T | T | T |
| 0.0841186891143516 | 0.4168590864566806 | 0.2269655440138571 | T | T | T |
| 0.2500000000000000 | 0.2500000000000000 | 0.1392870000000030 | F | F | F |
| 0.2477722339235798 | 0.2453792589689963 | 0.4008247294725472 | T | T | T |
| 0.4166669999999968 | 0.3333330000000032 | 0.0514190000000028 | F | F | F |
| 0.4175454541587797 | 0.3336635026493376 | 0.3149351690570079 | T | T | T |
| 0.3331613039015271 | 0.4167697600368148 | 0.2271009441449608 | T | T | T |
| 0.5000000000000000 | 0.2500000000000000 | 0.1392870000000030 | F | F | F |
| 0.5008511753334316 | 0.2489850039640907 | 0.4043456073549436 | T | T | T |
| 0.6666669999999968 | 0.3333330000000032 | 0.0514190000000028 | F | F | F |
| 0.6665477363497330 | 0.3337485852700273 | 0.3139455992376985 | T | T | T |
| 0.5832126420200352 | 0.4168300068710892 | 0.2269670958110013 | T | T | T |
| 0.7500000000000000 | 0.2500000000000000 | 0.1392870000000030 | F | F | F |
| 0.7504832288898077 | 0.2501961356678936 | 0.4042951173253326 | T | T | T |
| 0.9166669999999968 | 0.3333330000000032 | 0.0514190000000028 | F | F | F |
| 0.9161873593162607 | 0.3335589994008267 | 0.3147482653097161 | T | T | T |
| 0.8336219269617847 | 0.4168717567801492 | 0.2268752039489126 | T | T | T |
| 0.0000000000000000 | 0.5000000000000000 | 0.1392870000000030 | F | F | F |
| 0.0016541630310290 | 0.5019031904041563 | 0.4006403914503867 | T | T | T |
| 0.1666669999999968 | 0.5833330000000032 | 0.0514190000000028 | F | F | F |
| 0.1671678164862253 | 0.5833218480793592 | 0.3147075526348808 | T | T | T |
| 0.0838228852257142 | 0.6670445711319380 | 0.2265647217997049 | T | T | T |
| 0.2500000000000000 | 0.5000000000000000 | 0.1392870000000030 | F | F | F |
| 0.4166669999999968 | 0.5833330000000032 | 0.0514190000000028 | F | F | F |
| 0.4172856595621092 | 0.5835083620173995 | 0.3152931802723521 | T | T | T |
| 0.3333739892391123 | 0.6666836679478538 | 0.2273954417117265 | T | T | T |
| 0.5000000000000000 | 0.5000000000000000 | 0.1392870000000030 | F | F | F |
| 0.6666669999999968 | 0.5833330000000032 | 0.0514190000000028 | F | F | F |
| 0.6669130147567851 | 0.5833304709409418 | 0.3152176984079769 | T | T | T |
| 0.5834946906965772 | 0.6671685504753938 | 0.2272257366924913 | T | T | T |
| 0.7500000000000000 | 0.5000000000000000 | 0.1392870000000030 | F | F | F |
| 0.7522619376109047 | 0.4984037862294007 | 0.4036876690902649 | T | T | T |
| 0.9166669999999968 | 0.5833330000000032 | 0.0514190000000028 | F | F | F |
| 0.9161732172685821 | 0.5835653656083165 | 0.3143473246211680 | T | T | T |
| 0.8334298211944503 | 0.6667498581759034 | 0.2269821884743483 | T | T | T |
| 0.0000000000000000 | 0.7500000000000000 | 0.1392870000000030 | F | F | F |
| 0.0022424749405223 | 0.7506718860517754 | 0.4006905379030130 | T | T | T |
| 0.1666669999999968 | 0.8333330000000032 | 0.0514190000000028 | F | F | F |
| 0.1667599177461636 | 0.8334379986680116 | 0.3137726934971080 | T | T | T |

|                           |                    |                     |                     |   |   |   |
|---------------------------|--------------------|---------------------|---------------------|---|---|---|
|                           | 0.0838059676932910 | 0.9168175319063092  | 0.2267277984661924  | T | T | T |
|                           | 0.2500000000000000 | 0.7500000000000000  | 0.1392870000000030  | F | F | F |
|                           | 0.2480091340043792 | 0.7530788479916600  | 0.4007172743237236  | T | T | T |
|                           | 0.4166669999999968 | 0.8333330000000032  | 0.0514190000000028  | F | F | F |
|                           | 0.4172718586226679 | 0.8335460578665177  | 0.3146928540926788  | T | T | T |
|                           | 0.3331902359723934 | 0.9163906536842058  | 0.2266396080937230  | T | T | T |
|                           | 0.5000000000000000 | 0.7500000000000000  | 0.1392870000000030  | F | F | F |
|                           | 0.6666669999999968 | 0.8333330000000032  | 0.0514190000000028  | F | F | F |
|                           | 0.6666139508380795 | 0.8333348127873945  | 0.3150967514378498  | T | T | T |
|                           | 0.5831485996212332 | 0.9160720178815329  | 0.2268639546037786  | T | T | T |
|                           | 0.7500000000000000 | 0.7500000000000000  | 0.1392870000000030  | F | F | F |
|                           | 0.9166669999999968 | 0.8333330000000032  | 0.0514190000000028  | F | F | F |
|                           | 0.9159340099437161 | 0.8327309781383790  | 0.3145204887305936  | T | T | T |
|                           | 0.8333683952912484 | 0.9164913394372347  | 0.2269178099077236  | T | T | T |
|                           | 0.6679139303487747 | 0.3346592635787021  | 0.4611490434060674  | T | T | T |
|                           | 0.5002850960098502 | 0.7524877087362298  | 0.4057762379185531  | T | T | T |
|                           | 0.7525937577508154 | 0.7517321808296401  | 0.4056634988817861  | T | T | T |
|                           | 0.2484146403447386 | 0.4992110090007513  | 0.4058543710415389  | T | T | T |
|                           | 0.4991854507844017 | 0.4987390781697633  | 0.4054155935988684  | T | T | T |
|                           | 0.6694582784639940 | 0.3361631859102474  | 0.5128342634882552  | T | T | T |
| 2Ag/Ni(111) <sup>S1</sup> | 1.0000000000000000 |                     |                     |   |   |   |
|                           | 8.6224000674449712 | -4.9781450000000014 | 0.0000000000000000  |   |   |   |
|                           | 0.0000000000000000 | 9.9562900000000010  | 0.0000000000000000  |   |   |   |
|                           | 0.0000000000000000 | 0.0000000000000000  | 23.1292800000000014 |   |   |   |
|                           | Ni                 | C                   | Ag                  | O |   |   |
|                           | 78                 | 1                   | 2                   | 1 |   |   |
|                           | Selective dynamics |                     |                     |   |   |   |
|                           | Direct             |                     |                     |   |   |   |
|                           | 0.7516479112000027 | 0.9975668909000035  | 0.1392870000000030  | F | F | F |
|                           | 0.7535523515779755 | 0.0027586152338484  | 0.4003710961493672  | T | T | T |
|                           | 0.9183149111999995 | 0.0808998908999996  | 0.0514190000000028  | F | F | F |
|                           | 0.9187392529996389 | 0.0808661729377830  | 0.3138190372572361  | T | T | T |
|                           | 0.8351055988992362 | 0.1643344124862840  | 0.2267469022925230  | T | T | T |
|                           | 0.0016479112000027 | 0.9975668909000035  | 0.1392870000000030  | F | F | F |
|                           | 0.0079504581719208 | 0.0041650389787814  | 0.4000385924975519  | T | T | T |
|                           | 0.1683149111999995 | 0.0808998908999996  | 0.0514190000000028  | F | F | F |
|                           | 0.1689986221559734 | 0.0807980735508798  | 0.3129429569020012  | T | T | T |
|                           | 0.0850422443292177 | 0.1646366716334582  | 0.2267001681093896  | T | T | T |
|                           | 0.2516479112000027 | 0.9975668909000035  | 0.1392870000000030  | F | F | F |
|                           | 0.2485058866243463 | 0.9956924909617872  | 0.4001195123769133  | T | T | T |
|                           | 0.4183149111999995 | 0.0808998908999996  | 0.0514190000000028  | F | F | F |
|                           | 0.4189038467334993 | 0.0808426415441138  | 0.3143239817278847  | T | T | T |
|                           | 0.3353619482875038 | 0.1644745812504086  | 0.2266301949094810  | T | T | T |
|                           | 0.5016479112000027 | 0.9975668909000035  | 0.1392870000000030  | F | F | F |
|                           | 0.5020753497102707 | 0.9996702395969834  | 0.4045407101506645  | T | T | T |
|                           | 0.6683149111999995 | 0.0808998908999996  | 0.0514190000000028  | F | F | F |
|                           | 0.6680734063771793 | 0.0807157378495695  | 0.3139189030856985  | T | T | T |
|                           | 0.5849799948064434 | 0.1642369432817118  | 0.2268002350649041  | T | T | T |
|                           | 0.7516479112000027 | 0.2475668909000035  | 0.1392870000000030  | F | F | F |
|                           | 0.7507030462707007 | 0.2471889482188517  | 0.4044368546377302  | T | T | T |
|                           | 0.9183149111999995 | 0.3308998908999996  | 0.0514190000000028  | F | F | F |

|                    |                    |                    |   |   |   |
|--------------------|--------------------|--------------------|---|---|---|
| 0.9172429809990104 | 0.3302159099841134 | 0.3146147980457181 | T | T | T |
| 0.8349795148131719 | 0.4138410811784869 | 0.2267164469593484 | T | T | T |
| 0.0016479112000027 | 0.2475668909000035 | 0.1392870000000030 | F | F | F |
| 0.9956298270926627 | 0.2430319500560804 | 0.4006123905997723 | T | T | T |
| 0.1683149111999995 | 0.3308998908999996 | 0.0514190000000028 | F | F | F |
| 0.1692911384911205 | 0.3319930669387008 | 0.3158349089294633 | T | T | T |
| 0.0855038854233255 | 0.4144569810455904 | 0.2272544327519731 | T | T | T |
| 0.2516479112000027 | 0.2475668909000035 | 0.1392870000000030 | F | F | F |
| 0.2537071661525699 | 0.2417230723557320 | 0.4003919433884771 | T | T | T |
| 0.4183149111999995 | 0.3308998908999996 | 0.0514190000000028 | F | F | F |
| 0.4192224028241726 | 0.3301724060462348 | 0.3141668769978446 | T | T | T |
| 0.3344296379994769 | 0.4144652303674676 | 0.2271731905631658 | T | T | T |
| 0.5016479112000027 | 0.2475668909000035 | 0.1392870000000030 | F | F | F |
| 0.5022680374119692 | 0.2459382611434696 | 0.4046642762969258 | T | T | T |
| 0.6683149111999995 | 0.3308998908999996 | 0.0514190000000028 | F | F | F |
| 0.6678226438197425 | 0.3302733159464729 | 0.3139417207530412 | T | T | T |
| 0.5848021238083404 | 0.4143399780014325 | 0.2268561421646053 | T | T | T |
| 0.7516479112000027 | 0.4975668909000035 | 0.1392870000000030 | F | F | F |
| 0.7533087601613647 | 0.4939239681453579 | 0.4003946110011304 | T | T | T |
| 0.9183149111999995 | 0.5808998908999996 | 0.0514190000000028 | F | F | F |
| 0.9184358618949857 | 0.5807235575955929 | 0.3138257730370563 | T | T | T |
| 0.8346856264213282 | 0.6640567020452006 | 0.2271445832652619 | T | T | T |
| 0.0016479112000027 | 0.4975668909000035 | 0.1392870000000030 | F | F | F |
| 0.9957526505323473 | 0.4962693771580796 | 0.4006792343117107 | T | T | T |
| 0.1683149111999995 | 0.5808998908999996 | 0.0514190000000028 | F | F | F |
| 0.1690700238902134 | 0.5803633375662528 | 0.3157220248113665 | T | T | T |
| 0.0849453975748738 | 0.6637338709496499 | 0.2266394496293183 | T | T | T |
| 0.2516479112000027 | 0.4975668909000035 | 0.1392870000000030 | F | F | F |
| 0.4183149111999995 | 0.5808998908999996 | 0.0514190000000028 | F | F | F |
| 0.4177838981536605 | 0.5803068877175354 | 0.3161619466062889 | T | T | T |
| 0.3345195274954482 | 0.6631822127310270 | 0.2270838841563059 | T | T | T |
| 0.5016479112000027 | 0.4975668909000035 | 0.1392870000000030 | F | F | F |
| 0.5023241337120268 | 0.4897881590290088 | 0.4004735608656035 | T | T | T |
| 0.6683149111999995 | 0.5808998908999996 | 0.0514190000000028 | F | F | F |
| 0.6690923793612026 | 0.5819453586030264 | 0.3151596905613734 | T | T | T |
| 0.5847171399025205 | 0.6640926003177541 | 0.2272050205556730 | T | T | T |
| 0.7516479112000027 | 0.7475668909000035 | 0.1392870000000030 | F | F | F |
| 0.9183149111999995 | 0.8308998908999996 | 0.0514190000000028 | F | F | F |
| 0.9173622720411226 | 0.8303250904479871 | 0.3153457240746419 | T | T | T |
| 0.8345842955767165 | 0.9136451715416964 | 0.2270495055634597 | T | T | T |
| 0.0016479112000027 | 0.7475668909000035 | 0.1392870000000030 | F | F | F |
| 0.0076669595027886 | 0.7468100022784525 | 0.4001021485796728 | T | T | T |
| 0.1683149111999995 | 0.8308998908999996 | 0.0514190000000028 | F | F | F |
| 0.1684747863766632 | 0.8310392281335158 | 0.3129886084532669 | T | T | T |
| 0.0845152787377625 | 0.9138188904213016 | 0.2265058258431944 | T | T | T |
| 0.2516479112000027 | 0.7475668909000035 | 0.1392870000000030 | F | F | F |
| 0.2536068091128698 | 0.7551416617817952 | 0.4002777534398846 | T | T | T |
| 0.4183149111999995 | 0.8308998908999996 | 0.0514190000000028 | F | F | F |
| 0.4190860860809338 | 0.8318122547624427 | 0.3141027452133643 | T | T | T |
| 0.3350225451598687 | 0.9139442410159114 | 0.2265957805432781 | T | T | T |
| 0.5016479112000027 | 0.7475668909000035 | 0.1392870000000030 | F | F | F |

|                           |                    |                     |                     |   |   |   |
|---------------------------|--------------------|---------------------|---------------------|---|---|---|
|                           | 0.5022353531974436 | 0.7555257456380676  | 0.4003218899540459  | T | T | T |
|                           | 0.6683149111999995 | 0.8308998908999996  | 0.0514190000000028  | F | F | F |
|                           | 0.6690744627809251 | 0.8301394689920423  | 0.3151644919678485  | T | T | T |
|                           | 0.5846556408737404 | 0.9136285901439946  | 0.2267749474964071  | T | T | T |
|                           | 0.5845484218464211 | 0.1634499716068122  | 0.4619467717585731  | T | T | T |
|                           | 0.7530908318894738 | 0.7481175631529939  | 0.4231337796695667  | T | T | T |
|                           | 0.2518345236419189 | 0.4974474620221416  | 0.4236308761218103  | T | T | T |
|                           | 0.5862427118598329 | 0.1638444859110051  | 0.5135896808991056  | T | T | T |
| 3Ag/Ni(111) <sup>PC</sup> | 1.00000000000000   |                     |                     |   |   |   |
|                           | 8.6224000674449712 | -4.9781450000000014 | 0.0000000000000000  |   |   |   |
|                           | 0.0000000000000000 | 9.9562900000000010  | 0.0000000000000000  |   |   |   |
|                           | 0.0000000000000000 | 0.0000000000000000  | 23.1292800000000014 |   |   |   |
|                           | Ni                 | C                   | Ag                  | O |   |   |
|                           | 77                 | 1                   | 3                   | 1 |   |   |
|                           | Selective dynamics |                     |                     |   |   |   |
|                           | Direct             |                     |                     |   |   |   |
|                           | 0.0000000000000000 | 0.0000000000000000  | 0.1392870000000030  | F | F | F |
|                           | 0.0005443577159103 | 0.9993720278169876  | 0.3992930399001389  | T | T | T |
|                           | 0.1666669999999968 | 0.0833330000000032  | 0.0514190000000028  | F | F | F |
|                           | 0.1684953203621818 | 0.0836073429688374  | 0.3130787878284609  | T | T | T |
|                           | 0.0839087898306347 | 0.1676293690921123  | 0.2263582221286665  | T | T | T |
|                           | 0.2500000000000000 | 0.0000000000000000  | 0.1392870000000030  | F | F | F |
|                           | 0.2497018254701086 | 0.9999325708587148  | 0.4035289837398748  | T | T | T |
|                           | 0.4166669999999968 | 0.0833330000000032  | 0.0514190000000028  | F | F | F |
|                           | 0.4161730142928456 | 0.0835248515135611  | 0.3127703770378338  | T | T | T |
|                           | 0.3338015484136659 | 0.1675539255039585  | 0.2263780357025267  | T | T | T |
|                           | 0.5000000000000000 | 0.0000000000000000  | 0.1392870000000030  | F | F | F |
|                           | 0.5017023598503750 | 0.0084271455045115  | 0.4027103399292241  | T | T | T |
|                           | 0.6666669999999968 | 0.0833330000000032  | 0.0514190000000028  | F | F | F |
|                           | 0.6663020489232218 | 0.0831614581536549  | 0.3139791769792018  | T | T | T |
|                           | 0.5840790108848929 | 0.1669398094902427  | 0.2264746730033996  | T | T | T |
|                           | 0.7500000000000000 | 0.0000000000000000  | 0.1392870000000030  | F | F | F |
|                           | 0.7572645158755545 | 0.0075987520415373  | 0.3995870945406091  | T | T | T |
|                           | 0.9166669999999968 | 0.0833330000000032  | 0.0514190000000028  | F | F | F |
|                           | 0.9172080128682331 | 0.0829347167182954  | 0.3125058773462006  | T | T | T |
|                           | 0.8335856230793264 | 0.1667714279185770  | 0.2261577477587127  | T | T | T |
|                           | 0.0000000000000000 | 0.2500000000000000  | 0.1392870000000030  | F | F | F |
|                           | 0.9924731766738372 | 0.2425144990248994  | 0.3995317060707670  | T | T | T |
|                           | 0.1666669999999968 | 0.3333330000000032  | 0.0514190000000028  | F | F | F |
|                           | 0.1681684003647219 | 0.3345087074126274  | 0.3155827329384048  | T | T | T |
|                           | 0.0842947305555918 | 0.4169172847953465  | 0.2273622036068080  | T | T | T |
|                           | 0.2500000000000000 | 0.2500000000000000  | 0.1392870000000030  | F | F | F |
|                           | 0.2420334622701220 | 0.2393262262392185  | 0.4003504386343372  | T | T | T |
|                           | 0.4166669999999968 | 0.3333330000000032  | 0.0514190000000028  | F | F | F |
|                           | 0.4172382313854832 | 0.3345059350817053  | 0.3158546128184085  | T | T | T |
|                           | 0.3337469476252774 | 0.4176930144869535  | 0.2277604750127591  | T | T | T |
|                           | 0.5000000000000000 | 0.2500000000000000  | 0.1392870000000030  | F | F | F |
|                           | 0.5014744286724503 | 0.2446155622481630  | 0.4023319008971118  | T | T | T |
|                           | 0.6666669999999968 | 0.3333330000000032  | 0.0514190000000028  | F | F | F |
|                           | 0.6660917857336467 | 0.3332268682110264  | 0.3137053382079051  | T | T | T |
|                           | 0.5833514409721162 | 0.4168803689561794  | 0.2271778077602866  | T | T | T |

|                           |                    |                     |                     |   |   |   |
|---------------------------|--------------------|---------------------|---------------------|---|---|---|
|                           | 0.7500000000000000 | 0.2500000000000000  | 0.1392870000000030  | F | F | F |
|                           | 0.7532281395562654 | 0.2519082490892853  | 0.4002085267928576  | T | T | T |
|                           | 0.9166669999999968 | 0.3333330000000032  | 0.0514190000000028  | F | F | F |
|                           | 0.9166697919971409 | 0.3332031533683166  | 0.3136827085200959  | T | T | T |
|                           | 0.8339826404872147 | 0.4169173059551947  | 0.2261457704296317  | T | T | T |
|                           | 0.0000000000000000 | 0.5000000000000000  | 0.1392870000000030  | F | F | F |
|                           | 0.9925331773484448 | 0.5004262335479491  | 0.3994497542294287  | T | T | T |
|                           | 0.1666669999999968 | 0.5833330000000032  | 0.0514190000000028  | F | F | F |
|                           | 0.1682513089914510 | 0.5837587170503653  | 0.3155157580042269  | T | T | T |
|                           | 0.0837768361029931 | 0.6662133829991020  | 0.2263784683144225  | T | T | T |
|                           | 0.2500000000000000 | 0.5000000000000000  | 0.1392870000000030  | F | F | F |
|                           | 0.4166669999999968 | 0.5833330000000032  | 0.0514190000000028  | F | F | F |
|                           | 0.4162905626018258 | 0.5836504285969233  | 0.3180217051827076  | T | T | T |
|                           | 0.3337818257465810 | 0.6663758651447068  | 0.2279599656925511  | T | T | T |
|                           | 0.5000000000000000 | 0.5000000000000000  | 0.1392870000000030  | F | F | F |
|                           | 0.6666669999999968 | 0.5833330000000032  | 0.0514190000000028  | F | F | F |
|                           | 0.6647962382835532 | 0.5828066699003873  | 0.3154390319566251  | T | T | T |
|                           | 0.5827020121696362 | 0.6665576147796346  | 0.2277864623218793  | T | T | T |
|                           | 0.7500000000000000 | 0.5000000000000000  | 0.1392870000000030  | F | F | F |
|                           | 0.7575726487426828 | 0.5002691771140337  | 0.3995194571709562  | T | T | T |
|                           | 0.9166669999999968 | 0.5833330000000032  | 0.0514190000000028  | F | F | F |
|                           | 0.9168393854736219 | 0.5847361169873658  | 0.3124926843580481  | T | T | T |
|                           | 0.8327274963100036 | 0.6664468534248208  | 0.2262261565386254  | T | T | T |
|                           | 0.0000000000000000 | 0.7500000000000000  | 0.1392870000000030  | F | F | F |
|                           | 0.0005834793515205 | 0.7516298986299794  | 0.3994760214837187  | T | T | T |
|                           | 0.1666669999999968 | 0.8333330000000032  | 0.0514190000000028  | F | F | F |
|                           | 0.1677200216150461 | 0.8344996920323824  | 0.3130512392548181  | T | T | T |
|                           | 0.0836203059487610 | 0.9166867637738733  | 0.2262611415073207  | T | T | T |
|                           | 0.2500000000000000 | 0.7500000000000000  | 0.1392870000000030  | F | F | F |
|                           | 0.2420410934803784 | 0.7530875138026722  | 0.4003880034657420  | T | T | T |
|                           | 0.4166669999999968 | 0.8333330000000032  | 0.0514190000000028  | F | F | F |
|                           | 0.4172317062067571 | 0.8335155116874273  | 0.3160327425534566  | T | T | T |
|                           | 0.3336884326760254 | 0.9160915373808385  | 0.2265472993157587  | T | T | T |
|                           | 0.5000000000000000 | 0.7500000000000000  | 0.1392870000000030  | F | F | F |
|                           | 0.6666669999999968 | 0.8333330000000032  | 0.0514190000000028  | F | F | F |
|                           | 0.6651440524464974 | 0.8324426243721987  | 0.3154988740601385  | T | T | T |
|                           | 0.5831798879667270 | 0.9159584796773500  | 0.2272923445475430  | T | T | T |
|                           | 0.7500000000000000 | 0.7500000000000000  | 0.1392870000000030  | F | F | F |
|                           | 0.7625704294976362 | 0.7565629827567473  | 0.4005657987582006  | T | T | T |
|                           | 0.9166669999999968 | 0.8333330000000032  | 0.0514190000000028  | F | F | F |
|                           | 0.9164138616463752 | 0.8330304560257072  | 0.3126644043564731  | T | T | T |
|                           | 0.8323962473978063 | 0.9160879053663107  | 0.2263528397357198  | T | T | T |
|                           | 0.4155757477776162 | 0.0840816373912737  | 0.4610142936488769  | T | T | T |
|                           | 0.5066033838302775 | 0.7630308282753504  | 0.4228732322869970  | T | T | T |
|                           | 0.2356850062790278 | 0.4931160789609709  | 0.4241509826743594  | T | T | T |
|                           | 0.5068088698393206 | 0.4946752403903245  | 0.4228109941985568  | T | T | T |
|                           | 0.4149158225340323 | 0.0844370687268022  | 0.5126695235364753  | T | T | T |
| 4Ag/Ni(111) <sup>PC</sup> | 1.0000000000000000 |                     |                     |   |   |   |
|                           | 8.6224000674449712 | -4.9781450000000014 | 0.0000000000000000  |   |   |   |
|                           | 0.0000000000000000 | 9.9562900000000010  | 0.0000000000000000  |   |   |   |
|                           | 0.0000000000000000 | 0.0000000000000000  | 23.1292800000000014 |   |   |   |

Ni C Ag O  
76 1 4 1

Selective dynamics

Direct

|                    |                    |                    |       |
|--------------------|--------------------|--------------------|-------|
| 0.0000000000000000 | 0.0000000000000000 | 0.1392870000000030 | F F F |
| 0.0072636778015718 | 0.0086180408570391 | 0.3982258516619234 | T T T |
| 0.1666669999999968 | 0.0833330000000032 | 0.0514190000000028 | F F F |
| 0.1680518690748827 | 0.0844265925436210 | 0.3118384003114181 | T T T |
| 0.0837015970804282 | 0.1676560794316160 | 0.2261919733285848 | T T T |
| 0.2500000000000000 | 0.0000000000000000 | 0.1392870000000030 | F F F |
| 0.2466986658433618 | 0.9982128803510475 | 0.3983856341790364 | T T T |
| 0.4166669999999968 | 0.0833330000000032 | 0.0514190000000028 | F F F |
| 0.4162559709985598 | 0.0836289393858761 | 0.3121646012624820 | T T T |
| 0.3338215865886198 | 0.1678705952996388 | 0.2260492595104797 | T T T |
| 0.5000000000000000 | 0.0000000000000000 | 0.1392870000000030 | F F F |
| 0.4999543989890938 | 0.0079767485548489 | 0.4019746927700650 | T T T |
| 0.6666669999999968 | 0.0833330000000032 | 0.0514190000000028 | F F F |
| 0.6662945906795815 | 0.0831694431688162 | 0.3130831892709948 | T T T |
| 0.5833195566379640 | 0.1666140234504289 | 0.2260141548207397 | T T T |
| 0.7500000000000000 | 0.0000000000000000 | 0.1392870000000030 | F F F |
| 0.7576865801855782 | 0.0110656120754457 | 0.3993024495898599 | T T T |
| 0.9166669999999968 | 0.0833330000000032 | 0.0514190000000028 | F F F |
| 0.9163401281420617 | 0.0830237734884734 | 0.3122877312644894 | T T T |
| 0.8333728170898038 | 0.1666762224081207 | 0.2260257714494924 | T T T |
| 0.0000000000000000 | 0.2500000000000000 | 0.1392870000000030 | F F F |
| 0.9923836954530406 | 0.2445910073663254 | 0.3992531850308687 | T T T |
| 0.1666669999999968 | 0.3333330000000032 | 0.0514190000000028 | F F F |
| 0.1679084084534252 | 0.3349513285728061 | 0.3155274383156564 | T T T |
| 0.0847053795111634 | 0.4172959615949617 | 0.2269821869121772 | T T T |
| 0.2500000000000000 | 0.2500000000000000 | 0.1392870000000030 | F F F |
| 0.2454336871886274 | 0.2391019787801107 | 0.4000750650576906 | T T T |
| 0.4166669999999968 | 0.3333330000000032 | 0.0514190000000028 | F F F |
| 0.4178740480153350 | 0.3350880433855229 | 0.3154702915590427 | T T T |
| 0.3333695843479510 | 0.4178731153010017 | 0.2276565341753358 | T T T |
| 0.5000000000000000 | 0.2500000000000000 | 0.1392870000000030 | F F F |
| 0.5000506898117454 | 0.2425937909937182 | 0.4017477193521202 | T T T |
| 0.6666669999999968 | 0.3333330000000032 | 0.0514190000000028 | F F F |
| 0.6662821808004877 | 0.3332926065298246 | 0.3128861813317441 | T T T |
| 0.5829103565428079 | 0.4177568815995041 | 0.2270240367477852 | T T T |
| 0.7500000000000000 | 0.2500000000000000 | 0.1392870000000030 | F F F |
| 0.7499471129138461 | 0.2503240854209414 | 0.4036914526308108 | T T T |
| 0.9166669999999968 | 0.3333330000000032 | 0.0514190000000028 | F F F |
| 0.9153761631410430 | 0.3326813389378045 | 0.3134942799193740 | T T T |
| 0.8333656280681633 | 0.4166062982321688 | 0.2260146986849987 | T T T |
| 0.0000000000000000 | 0.5000000000000000 | 0.1392870000000030 | F F F |
| 0.9922573821066878 | 0.4982934845511791 | 0.3991351198058948 | T T T |
| 0.1666669999999968 | 0.5833330000000032 | 0.0514190000000028 | F F F |
| 0.1679261577010220 | 0.5829241977802072 | 0.3154310702800313 | T T T |
| 0.0834193110469529 | 0.6660828945846841 | 0.2262306540948176 | T T T |
| 0.2500000000000000 | 0.5000000000000000 | 0.1392870000000030 | F F F |
| 0.4166669999999968 | 0.5833330000000032 | 0.0514190000000028 | F F F |

|                           |                    |                     |                     |   |   |   |
|---------------------------|--------------------|---------------------|---------------------|---|---|---|
|                           | 0.4166742208745681 | 0.5835879323339684  | 0.3178893506722273  | T | T | T |
|                           | 0.3334642219701927 | 0.6659855907348853  | 0.2278598450118747  | T | T | T |
|                           | 0.5000000000000000 | 0.5000000000000000  | 0.1392870000000030  | F | F | F |
|                           | 0.6666669999999968 | 0.5833330000000032  | 0.0514190000000028  | F | F | F |
|                           | 0.6659340282726411 | 0.5839416117542217  | 0.3166173992934838  | T | T | T |
|                           | 0.5826738553513697 | 0.6666492164990850  | 0.2282976470059247  | T | T | T |
|                           | 0.7500000000000000 | 0.5000000000000000  | 0.1392870000000030  | F | F | F |
|                           | 0.7576453080047586 | 0.4970541780153062  | 0.3993069231054833  | T | T | T |
|                           | 0.9166669999999968 | 0.5833330000000032  | 0.0514190000000028  | F | F | F |
|                           | 0.9158954694592736 | 0.5839185783240217  | 0.3123437072531007  | T | T | T |
|                           | 0.8322651001539025 | 0.6667143736826266  | 0.2267292902722815  | T | T | T |
|                           | 0.0000000000000000 | 0.7500000000000000  | 0.1392870000000030  | F | F | F |
|                           | 0.0072062764223033 | 0.7489465585478242  | 0.3984269271059281  | T | T | T |
|                           | 0.1666669999999968 | 0.8333330000000032  | 0.0514190000000028  | F | F | F |
|                           | 0.1671445158169522 | 0.8334054600438989  | 0.3120204919365256  | T | T | T |
|                           | 0.0828264517090637 | 0.9164568441183246  | 0.2260879765784489  | T | T | T |
|                           | 0.2500000000000000 | 0.7500000000000000  | 0.1392870000000030  | F | F | F |
|                           | 0.2451489984596546 | 0.7557072799274616  | 0.4000383990683463  | T | T | T |
|                           | 0.4166669999999968 | 0.8333330000000032  | 0.0514190000000028  | F | F | F |
|                           | 0.4176301326672232 | 0.8331427165147944  | 0.3155886511734203  | T | T | T |
|                           | 0.3336180585047449 | 0.9158906815107176  | 0.2261741953277976  | T | T | T |
|                           | 0.5000000000000000 | 0.7500000000000000  | 0.1392870000000030  | F | F | F |
|                           | 0.6666669999999968 | 0.8333330000000032  | 0.0514190000000028  | F | F | F |
|                           | 0.6659074521276847 | 0.8322122608885276  | 0.3167277424722293  | T | T | T |
|                           | 0.5828874551627702 | 0.9151469580426214  | 0.2271617955505109  | T | T | T |
|                           | 0.7500000000000000 | 0.7500000000000000  | 0.1392870000000030  | F | F | F |
|                           | 0.9166669999999968 | 0.8333330000000032  | 0.0514190000000028  | F | F | F |
|                           | 0.9144465092016304 | 0.8322472676934637  | 0.3146484240483400  | T | T | T |
|                           | 0.8321192895007796 | 0.9154426118873900  | 0.2268282338051058  | T | T | T |
|                           | 0.5844584161229767 | 0.1674832980023733  | 0.4610985878710105  | T | T | T |
|                           | 0.5008464660904411 | 0.7622901271830799  | 0.4227675922387683  | T | T | T |
|                           | 0.7681809167092807 | 0.7592762120569594  | 0.4262151248992160  | T | T | T |
|                           | 0.2335414359857646 | 0.4917972688647914  | 0.4259305674502311  | T | T | T |
|                           | 0.5009208076653195 | 0.4890018519463530  | 0.4225962395628018  | T | T | T |
|                           | 0.5849604120644085 | 0.1678799456320050  | 0.5127078013914022  | T | T | T |
| 2Au/Ni(111) <sup>SI</sup> | 1.0000000000000000 |                     |                     |   |   |   |
|                           | 8.6224000674449712 | -4.9781450000000014 | 0.0000000000000000  |   |   |   |
|                           | 0.0000000000000000 | 9.9562900000000010  | 0.0000000000000000  |   |   |   |
|                           | 0.0000000000000000 | 0.0000000000000000  | 23.1292800000000014 |   |   |   |
|                           | Ni C Au O          |                     |                     |   |   |   |
|                           | 78 1 2 1           |                     |                     |   |   |   |
|                           | Selective dynamics |                     |                     |   |   |   |
|                           | Direct             |                     |                     |   |   |   |
|                           | 0.7516479112000027 | 0.9975668909000035  | 0.1392870000000030  | F | F | F |
|                           | 0.7535344730255613 | 0.0026534520677505  | 0.4010501753817407  | T | T | T |
|                           | 0.9183149111999995 | 0.0808998908999996  | 0.0514190000000028  | F | F | F |
|                           | 0.9187271872799047 | 0.0812127369377080  | 0.3141630952006086  | T | T | T |
|                           | 0.8352064077722308 | 0.1643419810989314  | 0.2267993460719064  | T | T | T |
|                           | 0.0016479112000027 | 0.9975668909000035  | 0.1392870000000030  | F | F | F |
|                           | 0.0078192046442398 | 0.0036475615028023  | 0.4009941588631807  | T | T | T |
|                           | 0.1683149111999995 | 0.0808998908999996  | 0.0514190000000028  | F | F | F |

|                    |                    |                    |   |   |   |
|--------------------|--------------------|--------------------|---|---|---|
| 0.1691179165440451 | 0.0811324749812891 | 0.3136361305942275 | T | T | T |
| 0.0850175659707974 | 0.1644623387772245 | 0.2267433354102713 | T | T | T |
| 0.2516479112000027 | 0.9975668909000035 | 0.1392870000000030 | F | F | F |
| 0.2492401124097264 | 0.9960022767963154 | 0.4002684301031444 | T | T | T |
| 0.4183149111999995 | 0.0808998908999996 | 0.0514190000000028 | F | F | F |
| 0.4188363778645667 | 0.0807527495956345 | 0.3142393166854095 | T | T | T |
| 0.3350977562350059 | 0.1644064519905413 | 0.2267362120103206 | T | T | T |
| 0.5016479112000027 | 0.9975668909000035 | 0.1392870000000030 | F | F | F |
| 0.5015991719914165 | 0.9994173428116359 | 0.4043676030884069 | T | T | T |
| 0.6683149111999995 | 0.0808998908999996 | 0.0514190000000028 | F | F | F |
| 0.6683044586416815 | 0.0806571796499882 | 0.3140795516454334 | T | T | T |
| 0.5850100756479838 | 0.1642042510223984 | 0.2268261750574946 | T | T | T |
| 0.7516479112000027 | 0.2475668909000035 | 0.1392870000000030 | F | F | F |
| 0.7505675708472770 | 0.2470454022825488 | 0.4042257742366857 | T | T | T |
| 0.9183149111999995 | 0.3308998908999996 | 0.0514190000000028 | F | F | F |
| 0.9171854202026691 | 0.3300990818014148 | 0.3146841710165481 | T | T | T |
| 0.8351238820731539 | 0.4139759611332642 | 0.2267658453153826 | T | T | T |
| 0.0016479112000027 | 0.2475668909000035 | 0.1392870000000030 | F | F | F |
| 0.9957463534777398 | 0.2432322743030624 | 0.4013604108901227 | T | T | T |
| 0.1683149111999995 | 0.3308998908999996 | 0.0514190000000028 | F | F | F |
| 0.1687621884680905 | 0.3306491917989340 | 0.3150840387284797 | T | T | T |
| 0.0855360276511551 | 0.4145109682730084 | 0.2271403502754247 | T | T | T |
| 0.2516479112000027 | 0.2475668909000035 | 0.1392870000000030 | F | F | F |
| 0.2531824782071310 | 0.2418140420817299 | 0.4013207628867486 | T | T | T |
| 0.4183149111999995 | 0.3308998908999996 | 0.0514190000000028 | F | F | F |
| 0.4193154353334934 | 0.3300619707281329 | 0.3145251952431778 | T | T | T |
| 0.3346081956249798 | 0.4144509040388824 | 0.2270538236459778 | T | T | T |
| 0.5016479112000027 | 0.2475668909000035 | 0.1392870000000030 | F | F | F |
| 0.5018785778176384 | 0.2454827927226215 | 0.4044725978464544 | T | T | T |
| 0.6683149111999995 | 0.3308998908999996 | 0.0514190000000028 | F | F | F |
| 0.6680370093374224 | 0.3303526508232303 | 0.3140822107806364 | T | T | T |
| 0.5846063588143842 | 0.4140959632531626 | 0.2268351311017742 | T | T | T |
| 0.7516479112000027 | 0.4975668909000035 | 0.1392870000000030 | F | F | F |
| 0.7531658016945287 | 0.4938483217619836 | 0.4011586819531907 | T | T | T |
| 0.9183149111999995 | 0.5808998908999996 | 0.0514190000000028 | F | F | F |
| 0.9185461517915130 | 0.5803388304183682 | 0.3142808266932368 | T | T | T |
| 0.8347241791457513 | 0.6639624326949376 | 0.2270948200602849 | T | T | T |
| 0.0016479112000027 | 0.4975668909000035 | 0.1392870000000030 | F | F | F |
| 0.9960802671465497 | 0.4962051298258038 | 0.4014529190291589 | T | T | T |
| 0.1683149111999995 | 0.5808998908999996 | 0.0514190000000028 | F | F | F |
| 0.1685912719943866 | 0.5809346844059139 | 0.3150798611473979 | T | T | T |
| 0.0848404680374998 | 0.6639392297890117 | 0.2267193710677258 | T | T | T |
| 0.2516479112000027 | 0.4975668909000035 | 0.1392870000000030 | F | F | F |
| 0.4183149111999995 | 0.5808998908999996 | 0.0514190000000028 | F | F | F |
| 0.4185495779145169 | 0.5805053587009226 | 0.3153686638172350 | T | T | T |
| 0.3345579951704864 | 0.6632852542675368 | 0.2270670886493938 | T | T | T |
| 0.5016479112000027 | 0.4975668909000035 | 0.1392870000000030 | F | F | F |
| 0.5020346615976818 | 0.4893743588776114 | 0.4018635812634160 | T | T | T |
| 0.6683149111999995 | 0.5808998908999996 | 0.0514190000000028 | F | F | F |
| 0.6684083441304105 | 0.5804987671599265 | 0.3147341053037834 | T | T | T |
| 0.5848790631169688 | 0.6641178138161117 | 0.2271261961631597 | T | T | T |



|                           |                    |                     |                     |   |   |   |
|---------------------------|--------------------|---------------------|---------------------|---|---|---|
|                           | 0.7516479112000027 | 0.7475668909000035  | 0.1392870000000030  | F | F | F |
|                           | 0.9183149111999995 | 0.8308998908999996  | 0.0514190000000028  | F | F | F |
|                           | 0.9187269021068987 | 0.8309218309058973  | 0.3146380467057184  | T | T | T |
|                           | 0.8346388221744803 | 0.9137729411446975  | 0.2270035829701427  | T | T | T |
|                           | 0.0016479112000027 | 0.7475668909000035  | 0.1392870000000030  | F | F | F |
|                           | 0.0075704254824964 | 0.7474053807807904  | 0.4010379377362219  | T | T | T |
|                           | 0.1683149111999995 | 0.8308998908999996  | 0.0514190000000028  | F | F | F |
|                           | 0.1686297071951543 | 0.8308553475067683  | 0.3135289958575806  | T | T | T |
|                           | 0.0847932937447224 | 0.9140007349270785  | 0.2265525403447403  | T | T | T |
|                           | 0.2516479112000027 | 0.7475668909000035  | 0.1392870000000030  | F | F | F |
|                           | 0.2527593433838148 | 0.7540954326176966  | 0.4012801083830068  | T | T | T |
|                           | 0.4183149111999995 | 0.8308998908999996  | 0.0514190000000028  | F | F | F |
|                           | 0.4190056097659566 | 0.8318307690641513  | 0.3144857962688236  | T | T | T |
|                           | 0.3350274699811784 | 0.9137731903298241  | 0.2266592052438771  | T | T | T |
|                           | 0.5016479112000027 | 0.7475668909000035  | 0.1392870000000030  | F | F | F |
|                           | 0.5020083713111513 | 0.7555336004085662  | 0.4017268992826972  | T | T | T |
|                           | 0.6683149111999995 | 0.8308998908999996  | 0.0514190000000028  | F | F | F |
|                           | 0.6682411591127291 | 0.8307029642909917  | 0.3146968547861324  | T | T | T |
|                           | 0.5845182775431377 | 0.9136431102771702  | 0.2268235933200010  | T | T | T |
|                           | 0.5847411336623749 | 0.1636324066727710  | 0.4617554461502418  | T | T | T |
|                           | 0.7530503862621319 | 0.7481395331704879  | 0.4171892376151213  | T | T | T |
|                           | 0.2511192396164995 | 0.4970229275829896  | 0.4177106852392274  | T | T | T |
|                           | 0.5865383410060325 | 0.1640917565939649  | 0.5134031558694498  | T | T | T |
| 3Au/Ni(111) <sup>SI</sup> | 1.00000000000000   |                     |                     |   |   |   |
|                           | 8.6224000674449712 | -4.9781450000000014 | 0.0000000000000000  |   |   |   |
|                           | 0.0000000000000000 | 9.9562900000000010  | 0.0000000000000000  |   |   |   |
|                           | 0.0000000000000000 | 0.0000000000000000  | 23.1292800000000014 |   |   |   |
|                           | Ni                 | C                   | Au                  | O |   |   |
|                           | 77                 | 1                   | 3                   | 1 |   |   |
|                           | Selective dynamics |                     |                     |   |   |   |
|                           | Direct             |                     |                     |   |   |   |
|                           | 0.7444199999999981 | 0.9828789999999969  | 0.1392870000000030  | F | F | F |
|                           | 0.7463185242091646 | 0.9893200260551126  | 0.4009961675150329  | T | T | T |
|                           | 0.9110870000000020 | 0.0662120000000002  | 0.0514190000000028  | F | F | F |
|                           | 0.9124041959107529 | 0.0664615076525496  | 0.3135557129236989  | T | T | T |
|                           | 0.8283378972099693 | 0.1496995767904449  | 0.2266959628549196  | T | T | T |
|                           | 0.9944199999999981 | 0.9828789999999969  | 0.1392870000000030  | F | F | F |
|                           | 0.9980814996236000 | 0.9902041665607704  | 0.4003624898080205  | T | T | T |
|                           | 0.1610870000000020 | 0.0662120000000002  | 0.0514190000000028  | F | F | F |
|                           | 0.1615728956381874 | 0.0658786513707161  | 0.3136481696285381  | T | T | T |
|                           | 0.0782520237037840 | 0.1500386462637222  | 0.2263875907191162  | T | T | T |
|                           | 0.2444199999999981 | 0.9828789999999969  | 0.1392870000000030  | F | F | F |
|                           | 0.2388361072477803 | 0.9791244085595283  | 0.4035745633967209  | T | T | T |
|                           | 0.4110870000000020 | 0.0662120000000002  | 0.0514190000000028  | F | F | F |
|                           | 0.4107267417399322 | 0.0660250718214340  | 0.3144910458956872  | T | T | T |
|                           | 0.3283888953517652 | 0.1496879046215444  | 0.2268908738583763  | T | T | T |
|                           | 0.4944199999999981 | 0.9828789999999969  | 0.1392870000000030  | F | F | F |
|                           | 0.4993248987952535 | 0.9806626726087264  | 0.4001912587010270  | T | T | T |
|                           | 0.6610870000000020 | 0.0662120000000002  | 0.0514190000000028  | F | F | F |
|                           | 0.6613552351657793 | 0.0662420565601335  | 0.3136554864390537  | T | T | T |
|                           | 0.5785271709243768 | 0.1500477769036905  | 0.2267111909653260  | T | T | T |

|                    |                    |                    |   |   |   |
|--------------------|--------------------|--------------------|---|---|---|
| 0.7444199999999981 | 0.2328789999999969 | 0.1392870000000030 | F | F | F |
| 0.7500602687297573 | 0.2327941640257307 | 0.4010114412534652 | T | T | T |
| 0.9110870000000020 | 0.3162120000000002 | 0.0514190000000028 | F | F | F |
| 0.9114070970000832 | 0.3168187961656507 | 0.3136147889390277 | T | T | T |
| 0.8281899147719467 | 0.3993811778044865 | 0.2263439284075421 | T | T | T |
| 0.9944199999999981 | 0.2328789999999969 | 0.1392870000000030 | F | F | F |
| 0.9896943697074146 | 0.2287845734104479 | 0.4010038443828710 | T | T | T |
| 0.1610870000000020 | 0.3162120000000002 | 0.0514190000000028 | F | F | F |
| 0.1618280772133449 | 0.3164847652867178 | 0.3145015204221807 | T | T | T |
| 0.0787366866799022 | 0.3996235984445364 | 0.2267087653067751 | T | T | T |
| 0.2444199999999981 | 0.2328789999999969 | 0.1392870000000030 | F | F | F |
| 0.2392573079429976 | 0.2276217356406437 | 0.4014322019307858 | T | T | T |
| 0.4110870000000020 | 0.3162120000000002 | 0.0514190000000028 | F | F | F |
| 0.4116382226555202 | 0.3160965906805901 | 0.3145124135364110 | T | T | T |
| 0.3284578388576980 | 0.3998329723037790 | 0.2269948134710879 | T | T | T |
| 0.4944199999999981 | 0.2328789999999969 | 0.1392870000000030 | F | F | F |
| 0.6610870000000020 | 0.3162120000000002 | 0.0514190000000028 | F | F | F |
| 0.6615511299264647 | 0.3167853573030097 | 0.3144330482187817 | T | T | T |
| 0.5783499341980245 | 0.3995255374007906 | 0.2267986144065657 | T | T | T |
| 0.7444199999999981 | 0.4828789999999969 | 0.1392870000000030 | F | F | F |
| 0.7513240638042590 | 0.4835751905903335 | 0.4013098959204275 | T | T | T |
| 0.9110870000000020 | 0.5662120000000002 | 0.0514190000000028 | F | F | F |
| 0.9125265348522202 | 0.5669770726154878 | 0.3136487897742747 | T | T | T |
| 0.8283431341925649 | 0.6498059659644515 | 0.2269475054594035 | T | T | T |
| 0.9944199999999981 | 0.4828789999999969 | 0.1392870000000030 | F | F | F |
| 0.9886765948151367 | 0.4797456862160964 | 0.4002598230608798 | T | T | T |
| 0.1610870000000020 | 0.5662120000000002 | 0.0514190000000028 | F | F | F |
| 0.1622569664929603 | 0.5676922390950562 | 0.3147813051463249 | T | T | T |
| 0.0783617891843231 | 0.6494017847021862 | 0.2265969657600891 | T | T | T |
| 0.2444199999999981 | 0.4828789999999969 | 0.1392870000000030 | F | F | F |
| 0.4110870000000020 | 0.5662120000000002 | 0.0514190000000028 | F | F | F |
| 0.4109055637427565 | 0.5665319652185589 | 0.3145339190228220 | T | T | T |
| 0.3285419484443646 | 0.6497390474050295 | 0.2269115374117860 | T | T | T |
| 0.4944199999999981 | 0.4828789999999969 | 0.1392870000000030 | F | F | F |
| 0.4952355273490107 | 0.4835619245598786 | 0.4013789658656322 | T | T | T |
| 0.6610870000000020 | 0.5662120000000002 | 0.0514190000000028 | F | F | F |
| 0.6623461158492534 | 0.5673608288448876 | 0.3146245438848936 | T | T | T |
| 0.5785953832185106 | 0.6498255396572103 | 0.2270131343330021 | T | T | T |
| 0.7444199999999981 | 0.7328789999999969 | 0.1392870000000030 | F | F | F |
| 0.9110870000000020 | 0.8162120000000002 | 0.0514190000000028 | F | F | F |
| 0.9121294989316583 | 0.8158710490842950 | 0.3148011126412164 | T | T | T |
| 0.8281439928010312 | 0.8995233866568411 | 0.2268040702851092 | T | T | T |
| 0.9944199999999981 | 0.7328789999999969 | 0.1392870000000030 | F | F | F |
| 0.0002144681883059 | 0.7312661929686936 | 0.4040581652702453 | T | T | T |
| 0.1610870000000020 | 0.8162120000000002 | 0.0514190000000028 | F | F | F |
| 0.1615235624729408 | 0.8161507800355667 | 0.3135323504926510 | T | T | T |
| 0.0781483236161546 | 0.8997076352133342 | 0.2265673937844546 | T | T | T |
| 0.2444199999999981 | 0.7328789999999969 | 0.1392870000000030 | F | F | F |
| 0.2480530640583518 | 0.7402669542074219 | 0.4041113868488479 | T | T | T |
| 0.4110870000000020 | 0.8162120000000002 | 0.0514190000000028 | F | F | F |
| 0.4109895095355509 | 0.8166857363069351 | 0.3137428843726006 | T | T | T |

|                           |                                                                |
|---------------------------|----------------------------------------------------------------|
|                           | 0.3286307976265493 0.8998934155592675 0.2265743913430036 T T T |
|                           | 0.4944199999999981 0.7328789999999969 0.1392870000000030 F F F |
|                           | 0.4954608290711532 0.7393729807721100 0.4014154777537375 T T T |
|                           | 0.6610870000000020 0.8162120000000002 0.0514190000000028 F F F |
|                           | 0.6614547342348491 0.8161618510248787 0.3145131968560206 T T T |
|                           | 0.5787592872132458 0.8998755673564871 0.2263904706972161 T T T |
|                           | 0.1629338162395329 0.8185178430337617 0.4620067194720375 T T T |
|                           | 0.4953763682504062 0.2313839726214835 0.4170939601196201 T T T |
|                           | 0.7476765843096813 0.7357347318704373 0.4172552248712147 T T T |
|                           | 0.2431268879131687 0.4835443300397885 0.4173785754418072 T T T |
|                           | 0.1637069673859577 0.8203253910115255 0.5135789478969460 T T T |
| 4Au/Ni(111) <sup>S1</sup> | 1.0000000000000000                                             |
|                           | 8.6224000674449712 -4.9781450000000014 0.0000000000000000      |
|                           | 0.0000000000000000 9.9562900000000010 0.0000000000000000       |
|                           | 0.0000000000000000 0.0000000000000000 23.1292800000000014      |
|                           | Ni C Au O                                                      |
|                           | 76 1 4 1                                                       |
|                           | Selective dynamics                                             |
|                           | Direct                                                         |
|                           | 0.0034156355999997 0.2472240844000027 0.1392870000000030 F F F |
|                           | 0.1700826355999965 0.3305570843999988 0.0514190000000028 F F F |
|                           | 0.1707383515652600 0.3310961626369431 0.3144030099498499 T T T |
|                           | 0.0868700854239144 0.4142276356226858 0.2267186650975352 T T T |
|                           | 0.2534156355999997 0.2472240844000027 0.1392870000000030 F F F |
|                           | 0.2568542248471577 0.2506354356717776 0.4045120660093142 T T T |
|                           | 0.4200826355999965 0.3305570843999988 0.0514190000000028 F F F |
|                           | 0.4195920449905520 0.3306980150996386 0.3136638775295869 T T T |
|                           | 0.3368473513684703 0.4141820892842646 0.2267583724672554 T T T |
|                           | 0.5034156355999997 0.2472240844000027 0.1392870000000030 F F F |
|                           | 0.5041609994524857 0.2462860869998458 0.4006310148987902 T T T |
|                           | 0.6700826355999965 0.3305570843999988 0.0514190000000028 F F F |
|                           | 0.6698633212032626 0.3309824573962729 0.3137159637431141 T T T |
|                           | 0.5870657711410425 0.4143245923387974 0.2266782664747511 T T T |
|                           | 0.7534156355999997 0.2472240844000027 0.1392870000000030 F F F |
|                           | 0.7477514893962141 0.2427961305890030 0.4005167549996190 T T T |
|                           | 0.9200826355999965 0.3305570843999988 0.0514190000000028 F F F |
|                           | 0.9209059083209544 0.3309510355758953 0.3142617995845921 T T T |
|                           | 0.8368399680664226 0.4140263208036833 0.2267001231006999 T T T |
|                           | 0.0034156355999997 0.4972240844000027 0.1392870000000030 F F F |
|                           | 0.0089379496309776 0.5028355468726701 0.4010326494493867 T T T |
|                           | 0.1700826355999965 0.5805570843999988 0.0514190000000028 F F F |
|                           | 0.1707354039302058 0.5801264308864318 0.3139021404949463 T T T |
|                           | 0.0867896588330623 0.6642127246877281 0.2264936426357659 T T T |
|                           | 0.2534156355999997 0.4972240844000027 0.1392870000000030 F F F |
|                           | 0.2528153707841747 0.4970102138621905 0.4054733592170728 T T T |
|                           | 0.4200826355999965 0.5805570843999988 0.0514190000000028 F F F |
|                           | 0.4197935112814647 0.5800439773131393 0.3148357676176316 T T T |
|                           | 0.3368380391898860 0.6642114036896913 0.2268528568239994 T T T |
|                           | 0.5034156355999997 0.4972240844000027 0.1392870000000030 F F F |
|                           | 0.4984511613837695 0.4920285053715581 0.4047606755763334 T T T |
|                           | 0.6700826355999965 0.5805570843999988 0.0514190000000028 F F F |

|                           |                    |                    |   |   |   |
|---------------------------|--------------------|--------------------|---|---|---|
| 0.6693186981077448        | 0.5797223081152297 | 0.3148818252154211 | T | T | T |
| 0.5870915932514655        | 0.6639690531418926 | 0.2269940991528544 | T | T | T |
| 0.7534156355999997        | 0.4972240844000027 | 0.1392870000000030 | F | F | F |
| 0.9200826355999965        | 0.5805570843999988 | 0.0514190000000028 | F | F | F |
| 0.9201392774658381        | 0.5804519908620434 | 0.3142725499688627 | T | T | T |
| 0.8370751210295211        | 0.6640367091680810 | 0.2266962039942939 | T | T | T |
| 0.0034156355999997        | 0.7472240844000027 | 0.1392870000000030 | F | F | F |
| 0.0028581628043070        | 0.7478327162374010 | 0.4012187341718467 | T | T | T |
| 0.1700826355999965        | 0.8305570843999988 | 0.0514190000000028 | F | F | F |
| 0.1701463059471174        | 0.8303874095772478 | 0.3140737581438972 | T | T | T |
| 0.0866546336277850        | 0.9134355149315824 | 0.2265317072694986 | T | T | T |
| 0.2534156355999997        | 0.7472240844000027 | 0.1392870000000030 | F | F | F |
| 0.2482372883274638        | 0.7417834551479036 | 0.4008879665497589 | T | T | T |
| 0.4200826355999965        | 0.8305570843999988 | 0.0514190000000028 | F | F | F |
| 0.4203204721507105        | 0.8302452498434516 | 0.3142282764784419 | T | T | T |
| 0.3367275607703719        | 0.9139610444619696 | 0.2267119122633690 | T | T | T |
| 0.5034156355999997        | 0.7472240844000027 | 0.1392870000000030 | F | F | F |
| 0.6700826355999965        | 0.8305570843999988 | 0.0514190000000028 | F | F | F |
| 0.6700828675725768        | 0.8301418729015434 | 0.3138174142030905 | T | T | T |
| 0.5867125364293124        | 0.9136805002660945 | 0.2264642666977940 | T | T | T |
| 0.7534156355999997        | 0.7472240844000027 | 0.1392870000000030 | F | F | F |
| 0.7581597492590681        | 0.7519478815075124 | 0.4008009855770520 | T | T | T |
| 0.9200826355999965        | 0.8305570843999988 | 0.0514190000000028 | F | F | F |
| 0.9198910955534251        | 0.8305910821059937 | 0.3133720254087402 | T | T | T |
| 0.8370058981356877        | 0.9140754912913944 | 0.2264118537986686 | T | T | T |
| 0.0034156355999997        | 0.9972240844000027 | 0.1392870000000030 | F | F | F |
| 0.9982218605019846        | 0.9919548095588787 | 0.4009142501624171 | T | T | T |
| 0.1700826355999965        | 0.0805570843999988 | 0.0514190000000028 | F | F | F |
| 0.1705172451776241        | 0.0809412325462603 | 0.3147539750943368 | T | T | T |
| 0.0873194812879501        | 0.1642724898237302 | 0.2269731552197976 | T | T | T |
| 0.2534156355999997        | 0.9972240844000027 | 0.1392870000000030 | F | F | F |
| 0.4200826355999965        | 0.0805570843999988 | 0.0514190000000028 | F | F | F |
| 0.4196425623103545        | 0.0807083839841487 | 0.3140138678517542 | T | T | T |
| 0.3363124601887393        | 0.1636492317100068 | 0.2267986281969724 | T | T | T |
| 0.5034156355999997        | 0.9972240844000027 | 0.1392870000000030 | F | F | F |
| 0.5085349001657554        | 0.0032156352411081 | 0.4006645135907829 | T | T | T |
| 0.6700826355999965        | 0.0805570843999988 | 0.0514190000000028 | F | F | F |
| 0.6702595944625022        | 0.0809963385402305 | 0.3130050106658929 | T | T | T |
| 0.5867442185382343        | 0.1641077858565959 | 0.2263547711958247 | T | T | T |
| 0.7534156355999997        | 0.9972240844000027 | 0.1392870000000030 | F | F | F |
| 0.7528100843280682        | 0.9975085806717228 | 0.4005791450076725 | T | T | T |
| 0.9200826355999965        | 0.0805570843999988 | 0.0514190000000028 | F | F | F |
| 0.9208317853746192        | 0.0808553623008576 | 0.3140880981515062 | T | T | T |
| 0.8372788331034513        | 0.1644199821791693 | 0.2266629671828833 | T | T | T |
| 0.3377762202174136        | 0.4112544615306324 | 0.4628646778099570 | T | T | T |
| 0.9993297779963336        | 0.2456603812288362 | 0.4170605329389278 | T | T | T |
| 0.7538415611353527        | 0.4973896884901245 | 0.4176217063362148 | T | T | T |
| 0.2532382635821824        | 0.9963560513608656 | 0.4175917061880071 | T | T | T |
| 0.5048361322904120        | 0.7508051088370189 | 0.4169694355448929 | T | T | T |
| 0.3370657905313718        | 0.4120656830512655 | 0.5144561099215895 | T | T | T |
| 2Ni/Cu(111) <sup>S1</sup> | 1.00000000000000   |                    |   |   |   |

8.8905908144889398 -5.1329849999999997 0.0000000000000000  
0.0000000000000000 10.2659699999999994 0.0000000000000000  
0.0000000000000000 0.0000000000000000 23.3821300000000001

Ni C Cu O  
2 1 78 1

Selective dynamics

Direct

|                    |                    |                    |   |   |   |
|--------------------|--------------------|--------------------|---|---|---|
| 0.2508138199286947 | 0.5008475097829859 | 0.3861264633166712 | T | T | T |
| 0.7511973924742819 | 0.7507216788480449 | 0.3793913987915687 | T | T | T |
| 0.2524419789338879 | 0.5034480547095654 | 0.4608335849257088 | T | T | T |
| 0.0000000000000000 | 0.0000000000000000 | 0.1155260000000027 | F | F | F |
| 0.9983702783180419 | 0.9980916458111722 | 0.3832629434865282 | T | T | T |
| 0.1666669999999968 | 0.0833330000000032 | 0.0259050000000016 | F | F | F |
| 0.1666579478460974 | 0.0840193724168543 | 0.2946294163127519 | T | T | T |
| 0.0835778960916400 | 0.1671885511225497 | 0.2052415717263187 | T | T | T |
| 0.2500000000000000 | 0.0000000000000000 | 0.1155260000000027 | F | F | F |
| 0.2498953271391073 | 0.0000825357590202 | 0.3831739236115013 | T | T | T |
| 0.4166669999999968 | 0.0833330000000032 | 0.0259050000000016 | F | F | F |
| 0.4167239649983756 | 0.0834071735528354 | 0.2944075211067982 | T | T | T |
| 0.3333482873283842 | 0.1670069167575718 | 0.2051835368047037 | T | T | T |
| 0.5000000000000000 | 0.0000000000000000 | 0.1155260000000027 | F | F | F |
| 0.5005061389920940 | 0.0003003709058973 | 0.3831657492646627 | T | T | T |
| 0.6666669999999968 | 0.0833330000000032 | 0.0259050000000016 | F | F | F |
| 0.6669141566690513 | 0.0832147061223694 | 0.2943790700438100 | T | T | T |
| 0.5833636390976977 | 0.1666935660102027 | 0.2050168099963017 | T | T | T |
| 0.7500000000000000 | 0.0000000000000000 | 0.1155260000000027 | F | F | F |
| 0.7501141835280336 | 0.9981803606840032 | 0.3831644227680826 | T | T | T |
| 0.9166669999999968 | 0.0833330000000032 | 0.0259050000000016 | F | F | F |
| 0.9172097427625161 | 0.0838410601716149 | 0.2944774089610149 | T | T | T |
| 0.8337125664288934 | 0.1669839647802505 | 0.2051447118605836 | T | T | T |
| 0.0000000000000000 | 0.2500000000000000 | 0.1155260000000027 | F | F | F |
| 0.9997858936339128 | 0.2496706474791353 | 0.3831341564705326 | T | T | T |
| 0.1666669999999968 | 0.3333330000000032 | 0.0259050000000016 | F | F | F |
| 0.1679532554574550 | 0.3357242970498575 | 0.2949578428928135 | T | T | T |
| 0.0833500507326406 | 0.4167025642292685 | 0.2047211099533044 | T | T | T |
| 0.2500000000000000 | 0.2500000000000000 | 0.1155260000000027 | F | F | F |
| 0.2503577400730137 | 0.2503440466689852 | 0.3832078374213808 | T | T | T |
| 0.4166669999999968 | 0.3333330000000032 | 0.0259050000000016 | F | F | F |
| 0.4165706605535533 | 0.3341413068943027 | 0.2946411152655415 | T | T | T |
| 0.3333493510739700 | 0.4167361137444843 | 0.2047454953467849 | T | T | T |
| 0.5000000000000000 | 0.2500000000000000 | 0.1155260000000027 | F | F | F |
| 0.5004504077379224 | 0.2503777002664407 | 0.3831849619056413 | T | T | T |
| 0.6666669999999968 | 0.3333330000000032 | 0.0259050000000016 | F | F | F |
| 0.6669040093869256 | 0.3337754025091328 | 0.2943891340725386 | T | T | T |
| 0.5831069800352893 | 0.4167923827441484 | 0.2051420324771200 | T | T | T |
| 0.7500000000000000 | 0.2500000000000000 | 0.1155260000000027 | F | F | F |
| 0.7498592850304249 | 0.2500000228681998 | 0.3830187688561750 | T | T | T |
| 0.9166669999999968 | 0.3333330000000032 | 0.0259050000000016 | F | F | F |
| 0.9175096760496260 | 0.3338044611669417 | 0.2945443948927249 | T | T | T |
| 0.8337068631927309 | 0.4167792210420487 | 0.2051441074958120 | T | T | T |
| 0.0000000000000000 | 0.5000000000000000 | 0.1155260000000027 | F | F | F |

|                           |                    |                     |                     |   |   |   |
|---------------------------|--------------------|---------------------|---------------------|---|---|---|
|                           | 0.9996858859783870 | 0.5003076302322427  | 0.3830998491127318  | T | T | T |
|                           | 0.1666669999999968 | 0.5833330000000032  | 0.0259050000000016  | F | F | F |
|                           | 0.1678774347579477 | 0.5824464211745024  | 0.2948778851391722  | T | T | T |
|                           | 0.0835398071363613 | 0.6664647882715613  | 0.2052131425600336  | T | T | T |
|                           | 0.2500000000000000 | 0.5000000000000000  | 0.1155260000000027  | F | F | F |
|                           | 0.4166669999999968 | 0.5833330000000032  | 0.0259050000000016  | F | F | F |
|                           | 0.4148341448588155 | 0.5824886826927340  | 0.2948980634098461  | T | T | T |
|                           | 0.3333453786568796 | 0.6666564617644966  | 0.2047302247753322  | T | T | T |
|                           | 0.5000000000000000 | 0.5000000000000000  | 0.1155260000000027  | F | F | F |
|                           | 0.5024241970591348 | 0.5021085344093237  | 0.3832924860037537  | T | T | T |
|                           | 0.6666669999999968 | 0.5833330000000032  | 0.0259050000000016  | F | F | F |
|                           | 0.6664271468338967 | 0.5838075521306081  | 0.2941302831011754  | T | T | T |
|                           | 0.5827006685967717 | 0.6663669330537161  | 0.2048776039936584  | T | T | T |
|                           | 0.7500000000000000 | 0.5000000000000000  | 0.1155260000000027  | F | F | F |
|                           | 0.7500277545848917 | 0.5020642785724618  | 0.3831646167739251  | T | T | T |
|                           | 0.9166669999999968 | 0.5833330000000032  | 0.0259050000000016  | F | F | F |
|                           | 0.9171624867947088 | 0.5834714143977280  | 0.2944723654390700  | T | T | T |
|                           | 0.8333878514972355 | 0.6664581452961755  | 0.2047977518364092  | T | T | T |
|                           | 0.0000000000000000 | 0.7500000000000000  | 0.1155260000000027  | F | F | F |
|                           | 0.9983185184113168 | 0.7504743941489522  | 0.3832601253069541  | T | T | T |
|                           | 0.1666669999999968 | 0.8333330000000032  | 0.0259050000000016  | F | F | F |
|                           | 0.1666360672456193 | 0.8327890277650241  | 0.2946231948448457  | T | T | T |
|                           | 0.0835768951695286 | 0.9168323459242700  | 0.2051559474768254  | T | T | T |
|                           | 0.2500000000000000 | 0.7500000000000000  | 0.1155260000000027  | F | F | F |
|                           | 0.2503454661961868 | 0.7504032557025369  | 0.3831750675493879  | T | T | T |
|                           | 0.4166669999999968 | 0.8333330000000032  | 0.0259050000000016  | F | F | F |
|                           | 0.4165736740563872 | 0.8325262570489116  | 0.2946270462551581  | T | T | T |
|                           | 0.3333452992340540 | 0.9163955398235899  | 0.2051802333300685  | T | T | T |
|                           | 0.5000000000000000 | 0.7500000000000000  | 0.1155260000000027  | F | F | F |
|                           | 0.5025477127487079 | 0.7506137701188962  | 0.3832920282347558  | T | T | T |
|                           | 0.6666669999999968 | 0.8333330000000032  | 0.0259050000000016  | F | F | F |
|                           | 0.6664522292730766 | 0.8327280875345409  | 0.2941196113134339  | T | T | T |
|                           | 0.5831116507170933 | 0.9163612787523689  | 0.2051356825024655  | T | T | T |
|                           | 0.7500000000000000 | 0.7500000000000000  | 0.1155260000000027  | F | F | F |
|                           | 0.9166669999999968 | 0.8333330000000032  | 0.0259050000000016  | F | F | F |
|                           | 0.9166545475364387 | 0.8333931277152899  | 0.2938700127726079  | T | T | T |
|                           | 0.8334099860719348 | 0.9170164704443380  | 0.2047947901669076  | T | T | T |
|                           | 0.2536738942300616 | 0.5052176477067576  | 0.5106403660460472  | T | T | T |
| 3Ni/Cu(111) <sup>SI</sup> | 1.0000000000000000 |                     |                     |   |   |   |
|                           | 8.8905908144889398 | -5.1329849999999997 | 0.0000000000000000  |   |   |   |
|                           | 0.0000000000000000 | 10.2659699999999994 | 0.0000000000000000  |   |   |   |
|                           | 0.0000000000000000 | 0.0000000000000000  | 23.3821300000000001 |   |   |   |
|                           | Ni                 | C                   | Cu                  | O |   |   |
|                           | 3                  | 1                   | 77                  | 1 |   |   |
|                           | Selective dynamics |                     |                     |   |   |   |
|                           | Direct             |                     |                     |   |   |   |
|                           | 0.2501994792971365 | 0.2502687602055756  | 0.3864063407588248  | T | T | T |
|                           | 0.7504315169006288 | 0.5009680220877604  | 0.3795242485204296  | T | T | T |
|                           | 0.5007084776611667 | 0.7511309953698651  | 0.3794494403133997  | T | T | T |
|                           | 0.2496918361531995 | 0.2507038790395605  | 0.4611322791610858  | T | T | T |
|                           | 0.0000000000000000 | 0.0000000000000000  | 0.1155260000000027  | F | F | F |

|                     |                     |                    |   |   |   |
|---------------------|---------------------|--------------------|---|---|---|
| -0.0008149568780899 | -0.0007047888598864 | 0.3832005748281520 | T | T | T |
| 0.1666669999999968  | 0.0833330000000032  | 0.0259050000000016 | F | F | F |
| 0.1678168700465630  | 0.0855861725494618  | 0.2950912346252376 | T | T | T |
| 0.0833730288152890  | 0.1667141918287835  | 0.2048519318156109 | T | T | T |
| 0.2500000000000000  | 0.0000000000000000  | 0.1155260000000027 | F | F | F |
| 0.2504581749741018  | -0.0000376331618427 | 0.3833150564840150 | T | T | T |
| 0.4166669999999968  | 0.0833330000000032  | 0.0259050000000016 | F | F | F |
| 0.4166560857276777  | 0.0840715919492045  | 0.2947917842013258 | T | T | T |
| 0.3333278950263539  | 0.1667505562411292  | 0.2048746735118235 | T | T | T |
| 0.5000000000000000  | 0.0000000000000000  | 0.1155260000000027 | F | F | F |
| 0.5003814620326258  | 0.9985036953827234  | 0.3832283029471377 | T | T | T |
| 0.6666669999999968  | 0.0833330000000032  | 0.0259050000000016 | F | F | F |
| 0.6667919963857180  | 0.0835697630406962  | 0.2943619821401556 | T | T | T |
| 0.5831142042516886  | 0.1667595294865883  | 0.2052000833158677 | T | T | T |
| 0.7500000000000000  | 0.0000000000000000  | 0.1155260000000027 | F | F | F |
| 0.7479512014862597  | 0.9981166537161092  | 0.3830677306343636 | T | T | T |
| 0.9166669999999968  | 0.0833330000000032  | 0.0259050000000016 | F | F | F |
| 0.9172470727564083  | 0.0836899546714231  | 0.2946543627136161 | T | T | T |
| 0.8336415952243000  | 0.1667359530864604  | 0.2051825747088871 | T | T | T |
| 0.0000000000000000  | 0.2500000000000000  | 0.1155260000000027 | F | F | F |
| -0.0004057062750035 | 0.2503143735506984  | 0.3830904672678928 | T | T | T |
| 0.1666669999999968  | 0.3333330000000032  | 0.0259050000000016 | F | F | F |
| 0.1680509088308318  | 0.3326930972302064  | 0.2951008960253552 | T | T | T |
| 0.0835193579975009  | 0.4164694607168486  | 0.2052883409295580 | T | T | T |
| 0.2500000000000000  | 0.2500000000000000  | 0.1155260000000027 | F | F | F |
| 0.4166669999999968  | 0.3333330000000032  | 0.0259050000000016 | F | F | F |
| 0.4146915083327085  | 0.3326577121384398  | 0.2951549177737526 | T | T | T |
| 0.3333714216541440  | 0.4166775627705270  | 0.2048552428082198 | T | T | T |
| 0.5000000000000000  | 0.2500000000000000  | 0.1155260000000027 | F | F | F |
| 0.5021434273630173  | 0.2521666611035980  | 0.3833415887721139 | T | T | T |
| 0.6666669999999968  | 0.3333330000000032  | 0.0259050000000016 | F | F | F |
| 0.6662795692423635  | 0.3337767256310906  | 0.2942304856333556 | T | T | T |
| 0.5827044474268855  | 0.4163532499923852  | 0.2049658570413080 | T | T | T |
| 0.7500000000000000  | 0.2500000000000000  | 0.1155260000000027 | F | F | F |
| 0.7497264893129262  | 0.2517369171043021  | 0.3830765542984436 | T | T | T |
| 0.9166669999999968  | 0.3333330000000032  | 0.0259050000000016 | F | F | F |
| 0.9171339728398721  | 0.3333906842290171  | 0.2945193399138766 | T | T | T |
| 0.8333626579641895  | 0.4164482259880286  | 0.2048586470908503 | T | T | T |
| 0.0000000000000000  | 0.5000000000000000  | 0.1155260000000027 | F | F | F |
| 0.9986266241167258  | 0.5007066363333823  | 0.3831571917782697 | T | T | T |
| 0.1666669999999968  | 0.5833330000000032  | 0.0259050000000016 | F | F | F |
| 0.1668116431669646  | 0.5828500346806642  | 0.2946014337154156 | T | T | T |
| 0.0834794433058327  | 0.6667363814738664  | 0.2052395046413907 | T | T | T |
| 0.2500000000000000  | 0.5000000000000000  | 0.1155260000000027 | F | F | F |
| 0.2525013423289483  | 0.5023876097254254  | 0.3832459638503477 | T | T | T |
| 0.4166669999999968  | 0.5833330000000032  | 0.0259050000000016 | F | F | F |
| 0.4167972878713321  | 0.5830533004540170  | 0.2942601511084039 | T | T | T |
| 0.3331425366291315  | 0.6663238084216971  | 0.2048381059553923 | T | T | T |
| 0.5000000000000000  | 0.5000000000000000  | 0.1155260000000027 | F | F | F |
| 0.5020399729190269  | 0.5024469805680342  | 0.3833599086059212 | T | T | T |
| 0.6666669999999968  | 0.5833330000000032  | 0.0259050000000016 | F | F | F |

|                           |                    |                     |                     |   |   |   |
|---------------------------|--------------------|---------------------|---------------------|---|---|---|
|                           | 0.6662045734017631 | 0.5828391257613227  | 0.2940933603386058  | T | T | T |
|                           | 0.5831909352094619 | 0.6662778342841700  | 0.2047919032591651  | T | T | T |
|                           | 0.7500000000000000 | 0.5000000000000000  | 0.1155260000000027  | F | F | F |
|                           | 0.9166669999999968 | 0.5833330000000032  | 0.0259050000000016  | F | F | F |
|                           | 0.9164597572775138 | 0.5832720439308146  | 0.2940059574780517  | T | T | T |
|                           | 0.8333756355278840 | 0.6668978726523225  | 0.2048634675383412  | T | T | T |
|                           | 0.0000000000000000 | 0.7500000000000000  | 0.1155260000000027  | F | F | F |
|                           | 0.9980902104114625 | 0.7480011463254914  | 0.3832285880349115  | T | T | T |
|                           | 0.1666669999999968 | 0.8333330000000032  | 0.0259050000000016  | F | F | F |
|                           | 0.1666862134359593 | 0.8337976241531573  | 0.2947902255761268  | T | T | T |
|                           | 0.0835214576602036 | 0.9170861909859439  | 0.2053141017882069  | T | T | T |
|                           | 0.2500000000000000 | 0.7500000000000000  | 0.1155260000000027  | F | F | F |
|                           | 0.2519419535244845 | 0.7501792795676742  | 0.3832272614608599  | T | T | T |
|                           | 0.4166669999999968 | 0.8333330000000032  | 0.0259050000000016  | F | F | F |
|                           | 0.4167847849857433 | 0.8333156605599624  | 0.2940242260835641  | T | T | T |
|                           | 0.3333124615613856 | 0.9169788095228399  | 0.2052267452956246  | T | T | T |
|                           | 0.5000000000000000 | 0.7500000000000000  | 0.1155260000000027  | F | F | F |
|                           | 0.6666669999999968 | 0.8333330000000032  | 0.0259050000000016  | F | F | F |
|                           | 0.6665778424523802 | 0.8330637388611376  | 0.2939929418329614  | T | T | T |
|                           | 0.5834342962758019 | 0.9168803760458099  | 0.2047144595739946  | T | T | T |
|                           | 0.7500000000000000 | 0.7500000000000000  | 0.1155260000000027  | F | F | F |
|                           | 0.7481129011980754 | 0.7484406814656396  | 0.3831958629699698  | T | T | T |
|                           | 0.9166669999999968 | 0.8333330000000032  | 0.0259050000000016  | F | F | F |
|                           | 0.9168893170348286 | 0.8336877035107078  | 0.2945721535490203  | T | T | T |
|                           | 0.8336671234546316 | 0.9169259256202323  | 0.2051727892761757  | T | T | T |
|                           | 0.2496948487956715 | 0.2512289816536036  | 0.5109425123961404  | T | T | T |
| 4Ni/Cu(111) <sup>PC</sup> | 1.0000000000000000 |                     |                     |   |   |   |
|                           | 8.8905908144889398 | -5.1329849999999997 | 0.0000000000000000  |   |   |   |
|                           | 0.0000000000000000 | 10.2659699999999994 | 0.0000000000000000  |   |   |   |
|                           | 0.0000000000000000 | 0.0000000000000000  | 23.3821300000000001 |   |   |   |
|                           | Ni                 | C                   | Cu                  | O |   |   |
|                           | 4                  | 1                   | 76                  | 1 |   |   |
|                           | Selective dynamics |                     |                     |   |   |   |
|                           | Direct             |                     |                     |   |   |   |
|                           | 0.2535080523539001 | 0.2540076744524531  | 0.3822661433499226  | T | T | T |
|                           | 0.4989872384241210 | 0.2521940920475040  | 0.3824307733487788  | T | T | T |
|                           | 0.2511689024293861 | 0.5001843385469931  | 0.3794823187976107  | T | T | T |
|                           | 0.4970649210248836 | 0.4973254921310180  | 0.3822702773542936  | T | T | T |
|                           | 0.4164316971530276 | 0.3340507121018939  | 0.4369182160820224  | T | T | T |
|                           | 0.0000000000000000 | 0.0000000000000000  | 0.1155260000000027  | F | F | F |
|                           | 0.0030861524161146 | 0.0027459556131514  | 0.3829543675368158  | T | T | T |
|                           | 0.1666669999999968 | 0.0833330000000032  | 0.0259050000000016  | F | F | F |
|                           | 0.1682110734612620 | 0.0846828167501248  | 0.2944556626178895  | T | T | T |
|                           | 0.0837849069767738 | 0.1667329012043758  | 0.2048293587784339  | T | T | T |
|                           | 0.2500000000000000 | 0.0000000000000000  | 0.1155260000000027  | F | F | F |
|                           | 0.2513988229859014 | 0.0015959324338689  | 0.3830867910747979  | T | T | T |
|                           | 0.4166669999999968 | 0.0833330000000032  | 0.0259050000000016  | F | F | F |
|                           | 0.4176115557245277 | 0.0845040401776584  | 0.2945152222179397  | T | T | T |
|                           | 0.3337953677923277 | 0.1665276161970715  | 0.2047060553535038  | T | T | T |
|                           | 0.5000000000000000 | 0.0000000000000000  | 0.1155260000000027  | F | F | F |
|                           | 0.5004874559384500 | 0.0018717856195954  | 0.3829506777228709  | T | T | T |



|                    |                    |                    |   |   |   |
|--------------------|--------------------|--------------------|---|---|---|
| 0.6666669999999968 | 0.0833330000000032 | 0.0259050000000016 | F | F | F |
| 0.6672509257323213 | 0.0837691974622781 | 0.2945719577206129 | T | T | T |
| 0.5839237291274746 | 0.1667491627568979 | 0.2048952892257387 | T | T | T |
| 0.7500000000000000 | 0.0000000000000000 | 0.1155260000000027 | F | F | F |
| 0.7507635012070143 | 0.0002931752980953 | 0.3830964327069610 | T | T | T |
| 0.9166669999999968 | 0.0833330000000032 | 0.0259050000000016 | F | F | F |
| 0.9178049174143506 | 0.0839934026290923 | 0.2945717320783791 | T | T | T |
| 0.8339614451716904 | 0.1669831187366352 | 0.2052292377726300 | T | T | T |
| 0.0000000000000000 | 0.2500000000000000 | 0.1155260000000027 | F | F | F |
| 0.0049078435360575 | 0.2523100340022340 | 0.3829514738280587 | T | T | T |
| 0.1666669999999968 | 0.3333330000000032 | 0.0259050000000016 | F | F | F |
| 0.1681878664022875 | 0.3336422446311955 | 0.2939398805521077 | T | T | T |
| 0.0837929054943699 | 0.4167680340982851 | 0.2047816368009776 | T | T | T |
| 0.2500000000000000 | 0.2500000000000000 | 0.1155260000000027 | F | F | F |
| 0.4166669999999968 | 0.3333330000000032 | 0.0259050000000016 | F | F | F |
| 0.4173951204769091 | 0.3334657983020384 | 0.2932691798857265 | T | T | T |
| 0.3338375316268157 | 0.4168234297933524 | 0.2043271775658424 | T | T | T |
| 0.5000000000000000 | 0.2500000000000000 | 0.1155260000000027 | F | F | F |
| 0.6666669999999968 | 0.3333330000000032 | 0.0259050000000016 | F | F | F |
| 0.6665033188184376 | 0.3334558588497848 | 0.2945302433961693 | T | T | T |
| 0.5840546974187478 | 0.4168110841146508 | 0.2046824697989954 | T | T | T |
| 0.7500000000000000 | 0.2500000000000000 | 0.1155260000000027 | F | F | F |
| 0.7493775491776176 | 0.2507198951501080 | 0.3829354659865035 | T | T | T |
| 0.9166669999999968 | 0.3333330000000032 | 0.0259050000000016 | F | F | F |
| 0.9175806330059221 | 0.3336507680106010 | 0.2944684726329400 | T | T | T |
| 0.8336520308281401 | 0.4167278284164324 | 0.2051705566250674 | T | T | T |
| 0.0000000000000000 | 0.5000000000000000 | 0.1155260000000027 | F | F | F |
| 0.0028307708723730 | 0.5000810260803362 | 0.3833262680535957 | T | T | T |
| 0.1666669999999968 | 0.5833330000000032 | 0.0259050000000016 | F | F | F |
| 0.1679097684991921 | 0.5831602494466493 | 0.2943047701780777 | T | T | T |
| 0.0838466491680663 | 0.6667735040944781 | 0.2052578136941667 | T | T | T |
| 0.2500000000000000 | 0.5000000000000000 | 0.1155260000000027 | F | F | F |
| 0.4166669999999968 | 0.5833330000000032 | 0.0259050000000016 | F | F | F |
| 0.4173526832435662 | 0.5827348456573813 | 0.2939773255157349 | T | T | T |
| 0.3339821692609506 | 0.6669124131712155 | 0.2047965205002739 | T | T | T |
| 0.5000000000000000 | 0.5000000000000000 | 0.1155260000000027 | F | F | F |
| 0.6666669999999968 | 0.5833330000000032 | 0.0259050000000016 | F | F | F |
| 0.6661972944300746 | 0.5827027118908603 | 0.2944748792628188 | T | T | T |
| 0.5838903999219117 | 0.6668888768764679 | 0.2048277086586304 | T | T | T |
| 0.7500000000000000 | 0.5000000000000000 | 0.1155260000000027 | F | F | F |
| 0.7496785175709069 | 0.4998017481983318 | 0.3831084419400963 | T | T | T |
| 0.9166669999999968 | 0.5833330000000032 | 0.0259050000000016 | F | F | F |
| 0.9172680048758749 | 0.5833272656540540 | 0.2947242893035688 | T | T | T |
| 0.8336890760681154 | 0.6666382757800775 | 0.2051732327362911 | T | T | T |
| 0.0000000000000000 | 0.7500000000000000 | 0.1155260000000027 | F | F | F |
| 0.0009168368784967 | 0.7504099421772228 | 0.3833368073271601 | T | T | T |
| 0.1666669999999968 | 0.8333330000000032 | 0.0259050000000016 | F | F | F |
| 0.1677006577155802 | 0.8336786128101168 | 0.2947280551502332 | T | T | T |
| 0.0839652717410700 | 0.9168415706787791 | 0.2051748869090519 | T | T | T |
| 0.2500000000000000 | 0.7500000000000000 | 0.1155260000000027 | F | F | F |
| 0.2510584451039515 | 0.7484520351064786 | 0.3833577552166147 | T | T | T |

|                           |                                                                |
|---------------------------|----------------------------------------------------------------|
|                           | 0.416666999999968 0.8333330000000032 0.0259050000000016 F F F  |
|                           | 0.4174085826748065 0.8334134390637232 0.2945053866394844 T T T |
|                           | 0.3339535236662524 0.9169537077278855 0.2051903393702654 T T T |
|                           | 0.5000000000000000 0.7500000000000000 0.1155260000000027 F F F |
|                           | 0.4988486255028184 0.7462041241398093 0.3830001513551097 T T T |
|                           | 0.666666999999968 0.8333330000000032 0.0259050000000016 F F F  |
|                           | 0.6668878783288926 0.8330237640508980 0.2945863048645385 T T T |
|                           | 0.5837915004301680 0.9167775051616376 0.2052521720935874 T T T |
|                           | 0.7500000000000000 0.7500000000000000 0.1155260000000027 F F F |
|                           | 0.7484221028308204 0.7480277103512002 0.3829965471279013 T T T |
|                           | 0.916666999999968 0.8333330000000032 0.0259050000000016 F F F  |
|                           | 0.9173508456452255 0.8334834581279232 0.2946159341921837 T T T |
|                           | 0.8339322892998853 0.9167772411042538 0.2052517305928542 T T T |
|                           | 0.4166327898820530 0.3338319120675253 0.4881740956339279 T T T |
| 2Pd/Cu(111) <sup>s1</sup> | 1.0000000000000000                                             |
|                           | 8.8905908144889398 -5.1329849999999997 0.0000000000000000      |
|                           | 0.0000000000000000 10.2659699999999994 0.0000000000000000      |
|                           | 0.0000000000000000 0.0000000000000000 23.3821300000000001      |
|                           | C Pd Cu O                                                      |
|                           | 1 2 78 1                                                       |
|                           | Selective dynamics                                             |
|                           | Direct                                                         |
|                           | 0.7510796294802117 0.7514342419261274 0.4768804152844329 T T T |
|                           | 0.2488740397923401 0.4994484860269107 0.3869531730165413 T T T |
|                           | 0.7506218322527042 0.7503552012931342 0.3955202653965459 T T T |
|                           | 0.0000000000000000 0.0000000000000000 0.1155260000000027 F F F |
|                           | 0.0045503781856492 0.0044250780714837 0.3832452324798561 T T T |
|                           | 0.166666999999968 0.0833330000000032 0.0259050000000016 F F F  |
|                           | 0.1663325384175703 0.0829114588819230 0.2940169175631727 T T T |
|                           | 0.0831387647206780 0.1666962072893106 0.2051397289943289 T T T |
|                           | 0.2500000000000000 0.0000000000000000 0.1155260000000027 F F F |
|                           | 0.2509886800740955 0.0005045833528783 0.3827876177882474 T T T |
|                           | 0.416666999999968 0.0833330000000032 0.0259050000000016 F F F  |
|                           | 0.4166676887121952 0.0833542560552683 0.2937445528860173 T T T |
|                           | 0.3333121539998525 0.1669411739838901 0.2048948423563457 T T T |
|                           | 0.5000000000000000 0.0000000000000000 0.1155260000000027 F F F |
|                           | 0.4997166763922626 0.0014625023664975 0.3829355083893323 T T T |
|                           | 0.666666999999968 0.0833330000000032 0.0259050000000016 F F F  |
|                           | 0.6665836630795328 0.0829152128676908 0.2940680835487068 T T T |
|                           | 0.5835561895132801 0.1667842832513933 0.2047807818901334 T T T |
|                           | 0.7500000000000000 0.0000000000000000 0.1155260000000027 F F F |
|                           | 0.7499210206293671 0.0048730869535350 0.3832704896605077 T T T |
|                           | 0.916666999999968 0.0833330000000032 0.0259050000000016 F F F  |
|                           | 0.9161624961155305 0.0824835727514675 0.2944413795578602 T T T |
|                           | 0.8334438353059868 0.1665081570222966 0.2050675948250591 T T T |
|                           | 0.0000000000000000 0.2500000000000000 0.1155260000000027 F F F |
|                           | 0.9968815132989172 0.2476056251124364 0.3835319766092254 T T T |
|                           | 0.166666999999968 0.3333330000000032 0.0259050000000016 F F F  |
|                           | 0.1664424258099354 0.3328023000217899 0.2941960277341080 T T T |
|                           | 0.0833448184286484 0.4166827736833666 0.2048214921715863 T T T |
|                           | 0.2500000000000000 0.2500000000000000 0.1155260000000027 F F F |

|                    |                    |                    |   |   |   |
|--------------------|--------------------|--------------------|---|---|---|
| 0.2502798057400341 | 0.2466390987258079 | 0.3833715661415674 | T | T | T |
| 0.4166669999999968 | 0.3333330000000032 | 0.0259050000000016 | F | F | F |
| 0.4170157053102310 | 0.3338308049828936 | 0.2942941463974265 | T | T | T |
| 0.3336851960377315 | 0.4170676003373854 | 0.2049961878052272 | T | T | T |
| 0.5000000000000000 | 0.2500000000000000 | 0.1155260000000027 | F | F | F |
| 0.4997285318140122 | 0.2482842275129252 | 0.3829502278484175 | T | T | T |
| 0.6666669999999968 | 0.3333330000000032 | 0.0259050000000016 | F | F | F |
| 0.6665854716674909 | 0.3337013779476755 | 0.2940716972131768 | T | T | T |
| 0.5836414756867248 | 0.4174595883720625 | 0.2052805403907102 | T | T | T |
| 0.7500000000000000 | 0.2500000000000000 | 0.1155260000000027 | F | F | F |
| 0.7493106481703150 | 0.2496715315681041 | 0.3828280822975949 | T | T | T |
| 0.9166669999999968 | 0.3333330000000032 | 0.0259050000000016 | F | F | F |
| 0.9168621241019782 | 0.3334416139887491 | 0.2942644105322285 | T | T | T |
| 0.8334489670917468 | 0.4169611368001887 | 0.2050695123101963 | T | T | T |
| 0.0000000000000000 | 0.5000000000000000 | 0.1155260000000027 | F | F | F |
| 0.9968787669580057 | 0.4993023937409187 | 0.3835336330974771 | T | T | T |
| 0.1666669999999968 | 0.5833330000000032 | 0.0259050000000016 | F | F | F |
| 0.1664394669753634 | 0.5836425851934827 | 0.2942002190362786 | T | T | T |
| 0.0831354990336480 | 0.6664507596213103 | 0.2051435084040472 | T | T | T |
| 0.2500000000000000 | 0.5000000000000000 | 0.1155260000000027 | F | F | F |
| 0.4166669999999968 | 0.5833330000000032 | 0.0259050000000016 | F | F | F |
| 0.4180722375802406 | 0.5840413547190211 | 0.2946876661277589 | T | T | T |
| 0.3336745806968618 | 0.6666297305894676 | 0.2049965991350195 | T | T | T |
| 0.5000000000000000 | 0.5000000000000000 | 0.1155260000000027 | F | F | F |
| 0.4986825521145953 | 0.4942864765754546 | 0.3838954569444702 | T | T | T |
| 0.6666669999999968 | 0.5833330000000032 | 0.0259050000000016 | F | F | F |
| 0.6678063178808819 | 0.5854585802330092 | 0.2955087816710196 | T | T | T |
| 0.5832467735618969 | 0.6666239985701599 | 0.2051064785711144 | T | T | T |
| 0.7500000000000000 | 0.5000000000000000 | 0.1155260000000027 | F | F | F |
| 0.7499125638939727 | 0.4950834362282975 | 0.3832910970386194 | T | T | T |
| 0.9166669999999968 | 0.5833330000000032 | 0.0259050000000016 | F | F | F |
| 0.9161555000965197 | 0.5836909856164467 | 0.2944515733774989 | T | T | T |
| 0.8332154905528967 | 0.6667361795828899 | 0.2048691777984587 | T | T | T |
| 0.0000000000000000 | 0.7500000000000000 | 0.1155260000000027 | F | F | F |
| 0.0045238636327796 | 0.7501500585548305 | 0.3832526520947009 | T | T | T |
| 0.1666669999999968 | 0.8333330000000032 | 0.0259050000000016 | F | F | F |
| 0.1663201543008636 | 0.8334312180686094 | 0.2940193918264720 | T | T | T |
| 0.0824975924039474 | 0.9162545435804185 | 0.2051247390527302 | T | T | T |
| 0.2500000000000000 | 0.7500000000000000 | 0.1155260000000027 | F | F | F |
| 0.2502593426324006 | 0.7536588846567952 | 0.3833685674914500 | T | T | T |
| 0.4166669999999968 | 0.8333330000000032 | 0.0259050000000016 | F | F | F |
| 0.4170021685025903 | 0.8332046785717839 | 0.2942906859592139 | T | T | T |
| 0.3333131642244525 | 0.9163874780716610 | 0.2048973915559399 | T | T | T |
| 0.5000000000000000 | 0.7500000000000000 | 0.1155260000000027 | F | F | F |
| 0.4986889364615516 | 0.7544236366338621 | 0.3838777905929029 | T | T | T |
| 0.6666669999999968 | 0.8333330000000032 | 0.0259050000000016 | F | F | F |
| 0.6677886931231999 | 0.8323884275362489 | 0.2954807014920349 | T | T | T |
| 0.5836340816535373 | 0.9162004538016375 | 0.2052732148091435 | T | T | T |
| 0.7500000000000000 | 0.7500000000000000 | 0.1155260000000027 | F | F | F |
| 0.9166669999999968 | 0.8333330000000032 | 0.0259050000000016 | F | F | F |
| 0.9146115619973779 | 0.8323174383882596 | 0.2953873238029754 | T | T | T |

|                           |                    |                     |                     |   |   |   |
|---------------------------|--------------------|---------------------|---------------------|---|---|---|
|                           | 0.8332214542630363 | 0.9164912160855063  | 0.2048659267777560  | T | T | T |
|                           | 0.7515411994616943 | 0.7523746726084798  | 0.5263970366307343  | T | T | T |
| 3Pd/Cu(111) <sup>S1</sup> | 1.000000000000000  |                     |                     |   |   |   |
|                           | 8.8905908144889398 | -5.1329849999999997 | 0.0000000000000000  |   |   |   |
|                           | 0.0000000000000000 | 10.2659699999999994 | 0.0000000000000000  |   |   |   |
|                           | 0.0000000000000000 | 0.0000000000000000  | 23.3821300000000001 |   |   |   |
|                           | C                  | Pd                  | Cu                  | O |   |   |
|                           | 1                  | 3                   | 77                  | 1 |   |   |
|                           | Selective dynamics |                     |                     |   |   |   |
|                           | Direct             |                     |                     |   |   |   |
|                           | 0.7515346262747195 | 0.5044810137481434  | 0.4773887358747249  | T | T | T |
|                           | 0.2480531995153146 | 0.2485349711325794  | 0.3868252739875564  | T | T | T |
|                           | 0.7512048436754496 | 0.5005711566252015  | 0.3960033986280816  | T | T | T |
|                           | 0.4995850066725295 | 0.7513932099670414  | 0.3867595308180180  | T | T | T |
|                           | 0.0000000000000000 | 0.0000000000000000  | 0.1155260000000027  | F | F | F |
|                           | 0.9976043759537845 | 0.9981639212474983  | 0.3832885313168330  | T | T | T |
|                           | 0.1666669999999968 | 0.0833330000000032  | 0.0259050000000016  | F | F | F |
|                           | 0.1663495823808418 | 0.0827698919422280  | 0.2938465551649709  | T | T | T |
|                           | 0.0833113800545963 | 0.1667856263268097  | 0.2046596895982729  | T | T | T |
|                           | 0.2500000000000000 | 0.0000000000000000  | 0.1155260000000027  | F | F | F |
|                           | 0.2498233602419309 | 0.9970774924311385  | 0.3831254332293071  | T | T | T |
|                           | 0.4166669999999968 | 0.0833330000000032  | 0.0259050000000016  | F | F | F |
|                           | 0.4170444983513221 | 0.0841865251141880  | 0.2941225159823653  | T | T | T |
|                           | 0.3337344738549978 | 0.1671749584431045  | 0.2048132040978801  | T | T | T |
|                           | 0.5000000000000000 | 0.0000000000000000  | 0.1155260000000027  | F | F | F |
|                           | 0.4995631119664199 | 0.0022639481562276  | 0.3833135382041057  | T | T | T |
|                           | 0.6666669999999968 | 0.0833330000000032  | 0.0259050000000016  | F | F | F |
|                           | 0.6664734488217348 | 0.0835676256932476  | 0.2942453543919920  | T | T | T |
|                           | 0.5837737098456047 | 0.1675261545507458  | 0.2053390151810522  | T | T | T |
|                           | 0.7500000000000000 | 0.0000000000000000  | 0.1155260000000027  | F | F | F |
|                           | 0.7528720148389524 | 0.0031957609817419  | 0.3832514517047058  | T | T | T |
|                           | 0.9166669999999968 | 0.0833330000000032  | 0.0259050000000016  | F | F | F |
|                           | 0.9168947577922197 | 0.0836512739486187  | 0.2940702659642040  | T | T | T |
|                           | 0.8332363809827458 | 0.1669732688032992  | 0.2050983363677472  | T | T | T |
|                           | 0.0000000000000000 | 0.2500000000000000  | 0.1155260000000027  | F | F | F |
|                           | 0.9968462040925787 | 0.2495949576025167  | 0.3832987502521942  | T | T | T |
|                           | 0.1666669999999968 | 0.3333330000000032  | 0.0259050000000016  | F | F | F |
|                           | 0.1663555528062582 | 0.3337117372540432  | 0.2940203355820230  | T | T | T |
|                           | 0.0831419183172380 | 0.4166804936704214  | 0.2051577390891946  | T | T | T |
|                           | 0.2500000000000000 | 0.2500000000000000  | 0.1155260000000027  | F | F | F |
|                           | 0.4166669999999968 | 0.3333330000000032  | 0.0259050000000016  | F | F | F |
|                           | 0.4178305210770215 | 0.3339817814122304  | 0.2944161800491444  | T | T | T |
|                           | 0.3338023095566990 | 0.4170426194987118  | 0.2050433558691542  | T | T | T |
|                           | 0.5000000000000000 | 0.2500000000000000  | 0.1155260000000027  | F | F | F |
|                           | 0.4986709807261357 | 0.2452173456734657  | 0.3837241590873041  | T | T | T |
|                           | 0.6666669999999968 | 0.3333330000000032  | 0.0259050000000016  | F | F | F |
|                           | 0.6678744880707579 | 0.3357552496878468  | 0.2955013293528893  | T | T | T |
|                           | 0.5833954646402146 | 0.4168866184999842  | 0.2051682463520497  | T | T | T |
|                           | 0.7500000000000000 | 0.2500000000000000  | 0.1155260000000027  | F | F | F |
|                           | 0.7501251091312998 | 0.2460591824312202  | 0.3831972804636224  | T | T | T |
|                           | 0.9166669999999968 | 0.3333330000000032  | 0.0259050000000016  | F | F | F |

|                           |                    |                     |                     |   |   |   |
|---------------------------|--------------------|---------------------|---------------------|---|---|---|
|                           | 0.9160528491237789 | 0.3337951681650603  | 0.2943168993781972  | T | T | T |
|                           | 0.8331513272876084 | 0.4168025111745629  | 0.2048060707466961  | T | T | T |
|                           | 0.0000000000000000 | 0.5000000000000000  | 0.1155260000000027  | F | F | F |
|                           | 0.0035006574032579 | 0.4999235782064229  | 0.3831294183866119  | T | T | T |
|                           | 0.1666669999999968 | 0.5833330000000032  | 0.0259050000000016  | F | F | F |
|                           | 0.1664814764441919 | 0.5835828454939942  | 0.2941531562785946  | T | T | T |
|                           | 0.0825218677537007 | 0.6661828174270290  | 0.2051376484219035  | T | T | T |
|                           | 0.2500000000000000 | 0.5000000000000000  | 0.1155260000000027  | F | F | F |
|                           | 0.2461479767525984 | 0.5000004499561697  | 0.3838483953666856  | T | T | T |
|                           | 0.4166669999999968 | 0.5833330000000032  | 0.0259050000000016  | F | F | F |
|                           | 0.4166705992728857 | 0.5827192001706428  | 0.2943315279330738  | T | T | T |
|                           | 0.3333168906170438 | 0.6665046609134279  | 0.2048813812579776  | T | T | T |
|                           | 0.5000000000000000 | 0.5000000000000000  | 0.1155260000000027  | F | F | F |
|                           | 0.4983864483932693 | 0.4998432784900052  | 0.3841468486783884  | T | T | T |
|                           | 0.6666669999999968 | 0.5833330000000032  | 0.0259050000000016  | F | F | F |
|                           | 0.6677701920984080 | 0.5825981943501805  | 0.2956962728827946  | T | T | T |
|                           | 0.5836029723664655 | 0.6662702145731298  | 0.2052480284080007  | T | T | T |
|                           | 0.7500000000000000 | 0.5000000000000000  | 0.1155260000000027  | F | F | F |
|                           | 0.9166669999999968 | 0.5833330000000032  | 0.0259050000000016  | F | F | F |
|                           | 0.9145177320483467 | 0.5823590713418344  | 0.2952840151986186  | T | T | T |
|                           | 0.8329838986790312 | 0.6663616840183543  | 0.2048981761053813  | T | T | T |
|                           | 0.0000000000000000 | 0.7500000000000000  | 0.1155260000000027  | F | F | F |
|                           | 0.0042713715431530 | 0.7547242722280983  | 0.3829878200009829  | T | T | T |
|                           | 0.1666669999999968 | 0.8333330000000032  | 0.0259050000000016  | F | F | F |
|                           | 0.1661948925192807 | 0.8329343846570302  | 0.2938201026564566  | T | T | T |
|                           | 0.0830785756206869 | 0.9166514724829840  | 0.2049425973905238  | T | T | T |
|                           | 0.2500000000000000 | 0.7500000000000000  | 0.1155260000000027  | F | F | F |
|                           | 0.2472118248726116 | 0.7505442786230923  | 0.3831713650801500  | T | T | T |
|                           | 0.4166669999999968 | 0.8333330000000032  | 0.0259050000000016  | F | F | F |
|                           | 0.4163800786134005 | 0.8338074539763841  | 0.2938333275289835  | T | T | T |
|                           | 0.3335124430593349 | 0.9168545887374180  | 0.2049996337758153  | T | T | T |
|                           | 0.5000000000000000 | 0.7500000000000000  | 0.1155260000000027  | F | F | F |
|                           | 0.6666669999999968 | 0.8333330000000032  | 0.0259050000000016  | F | F | F |
|                           | 0.6671169516390661 | 0.8333006118731555  | 0.2941045734969085  | T | T | T |
|                           | 0.5834995797130496 | 0.9168470758989971  | 0.2047648121063315  | T | T | T |
|                           | 0.7500000000000000 | 0.7500000000000000  | 0.1155260000000027  | F | F | F |
|                           | 0.7540701230660102 | 0.7555708571307281  | 0.3836795523869114  | T | T | T |
|                           | 0.9166669999999968 | 0.8333330000000032  | 0.0259050000000016  | F | F | F |
|                           | 0.9161709546527721 | 0.8325942877792778  | 0.2941620168511247  | T | T | T |
|                           | 0.8330607972485531 | 0.9164221185655992  | 0.2051266050002470  | T | T | T |
|                           | 0.7514920980334349 | 0.5080862827296094  | 0.5268710145048476  | T | T | T |
| 4Pd/Cu(111) <sup>S1</sup> | 1.0000000000000000 |                     |                     |   |   |   |
|                           | 8.8905908144889398 | -5.1329849999999997 | 0.0000000000000000  |   |   |   |
|                           | 0.0000000000000000 | 10.2659699999999994 | 0.0000000000000000  |   |   |   |
|                           | 0.0000000000000000 | 0.0000000000000000  | 23.3821300000000001 |   |   |   |
|                           | C Pd Cu O          |                     |                     |   |   |   |
|                           | 1 4 76 1           |                     |                     |   |   |   |
|                           | Selective dynamics |                     |                     |   |   |   |
|                           | Direct             |                     |                     |   |   |   |
|                           | 0.7504305946840859 | 0.4979094911886283  | 0.4777062467910088  | T | T | T |
|                           | 0.0002459671478988 | 0.2480510038668128  | 0.3866727396310351  | T | T | T |

|                    |                    |                    |   |   |   |
|--------------------|--------------------|--------------------|---|---|---|
| 0.7500406649444229 | 0.4984265081759575 | 0.3962678469241873 | T | T | T |
| 0.4998103270271710 | 0.7484529242714166 | 0.3866037115123278 | T | T | T |
| 0.2499606182049249 | 0.9984544860892086 | 0.3864296047468170 | T | T | T |
| 0.0000000000000000 | 0.2484235322000004 | 0.1155260000000027 | F | F | F |
| 0.1666669999999968 | 0.3317565322000036 | 0.0259050000000016 | F | F | F |
| 0.1671236230132817 | 0.3322012927773296 | 0.2939421836985820 | T | T | T |
| 0.0831305031143316 | 0.4153325770389041 | 0.2048755372609383 | T | T | T |
| 0.2500000000000000 | 0.2484235322000004 | 0.1155260000000027 | F | F | F |
| 0.2522835006218786 | 0.2508686347244561 | 0.3838605351791677 | T | T | T |
| 0.4166669999999968 | 0.3317565322000036 | 0.0259050000000016 | F | F | F |
| 0.4173809400108299 | 0.3319490994498821 | 0.2943832725638501 | T | T | T |
| 0.3336528684992109 | 0.4153080114890997 | 0.2052461510871900 | T | T | T |
| 0.5000000000000000 | 0.2484235322000004 | 0.1155260000000027 | F | F | F |
| 0.4989500022356992 | 0.2476479729666095 | 0.3836277436131643 | T | T | T |
| 0.6666669999999968 | 0.3317565322000036 | 0.0259050000000016 | F | F | F |
| 0.6678205288078766 | 0.3342331841123227 | 0.2953862721893568 | T | T | T |
| 0.5836194494358550 | 0.4154528834228004 | 0.2050126663386666 | T | T | T |
| 0.7500000000000000 | 0.2484235322000004 | 0.1155260000000027 | F | F | F |
| 0.7471024970376802 | 0.2443311685824581 | 0.3836205481226174 | T | T | T |
| 0.9166669999999968 | 0.3317565322000036 | 0.0259050000000016 | F | F | F |
| 0.9159890878375097 | 0.3325987784721429 | 0.2942562481307823 | T | T | T |
| 0.8334072971986115 | 0.4152347406651359 | 0.2049292074482430 | T | T | T |
| 0.0000000000000000 | 0.4984235322000004 | 0.1155260000000027 | F | F | F |
| 0.0040865487318631 | 0.5012627670015881 | 0.3836040666024883 | T | T | T |
| 0.1666669999999968 | 0.5817565322000036 | 0.0259050000000016 | F | F | F |
| 0.1663672116731673 | 0.5816611604044200 | 0.2943189374902458 | T | T | T |
| 0.0828024555680121 | 0.6649305030125120 | 0.2054442592077350 | T | T | T |
| 0.2500000000000000 | 0.4984235322000004 | 0.1155260000000027 | F | F | F |
| 0.2499509163017352 | 0.4983117649972615 | 0.3837998782466368 | T | T | T |
| 0.4166669999999968 | 0.5817565322000036 | 0.0259050000000016 | F | F | F |
| 0.4169649723491629 | 0.5814271297256076 | 0.2940403078051104 | T | T | T |
| 0.3332907675526556 | 0.6651315447971060 | 0.2049425877680001 | T | T | T |
| 0.5000000000000000 | 0.4984235322000004 | 0.1155260000000027 | F | F | F |
| 0.4955257222383322 | 0.4949882789936458 | 0.3837116515884556 | T | T | T |
| 0.6666669999999968 | 0.5817565322000036 | 0.0259050000000016 | F | F | F |
| 0.6677056594873955 | 0.5807878599052542 | 0.2957482665433328 | T | T | T |
| 0.5838849902128521 | 0.6647716892561560 | 0.2050731707969338 | T | T | T |
| 0.7500000000000000 | 0.4984235322000004 | 0.1155260000000027 | F | F | F |
| 0.9166669999999968 | 0.5817565322000036 | 0.0259050000000016 | F | F | F |
| 0.9143084432538391 | 0.5807127563323357 | 0.2953994122439856 | T | T | T |
| 0.8331834264761218 | 0.6650174187133961 | 0.2050124778739878 | T | T | T |
| 0.0000000000000000 | 0.7484235322000004 | 0.1155260000000027 | F | F | F |
| 0.0007906558029348 | 0.7494911121562701 | 0.3836335453898841 | T | T | T |
| 0.1666669999999968 | 0.8317565322000036 | 0.0259050000000016 | F | F | F |
| 0.1659595508730373 | 0.8308130409414458 | 0.2939790110866209 | T | T | T |
| 0.0831410011248654 | 0.9149735987021667 | 0.2048720176842322 | T | T | T |
| 0.2500000000000000 | 0.7484235322000004 | 0.1155260000000027 | F | F | F |
| 0.2474056824071645 | 0.7458022847712720 | 0.3838302585751575 | T | T | T |
| 0.4166669999999968 | 0.8317565322000036 | 0.0259050000000016 | F | F | F |
| 0.4162828854673921 | 0.8323051653706762 | 0.2940524834568250 | T | T | T |
| 0.3335310769766895 | 0.9151091639709226 | 0.2048514935635810 | T | T | T |

|                           |                    |                     |                     |   |   |   |
|---------------------------|--------------------|---------------------|---------------------|---|---|---|
|                           | 0.5000000000000000 | 0.7484235322000004  | 0.1155260000000027  | F | F | F |
|                           | 0.6666669999999968 | 0.8317565322000036  | 0.0259050000000016  | F | F | F |
|                           | 0.6671140443426287 | 0.8315894105651240  | 0.2940366054145350  | T | T | T |
|                           | 0.5835055272358867 | 0.9153494221138412  | 0.2049421872407279  | T | T | T |
|                           | 0.7500000000000000 | 0.7484235322000004  | 0.1155260000000027  | F | F | F |
|                           | 0.7533596209864873 | 0.7528578196801743  | 0.3836857004001287  | T | T | T |
|                           | 0.9166669999999968 | 0.8317565322000036  | 0.0259050000000016  | F | F | F |
|                           | 0.9166009189762169 | 0.8311408375221676  | 0.2943894555570823  | T | T | T |
|                           | 0.8333529021307712 | 0.9150060350856569  | 0.2052475679928251  | T | T | T |
|                           | 0.0000000000000000 | 0.9984235322000004  | 0.1155260000000027  | F | F | F |
|                           | 0.9974819961637769 | 0.9960548636563336  | 0.3838926262468721  | T | T | T |
|                           | 0.1666669999999968 | 0.0817565322000036  | 0.0259050000000016  | F | F | F |
|                           | 0.1662848669036741 | 0.0822808250860453  | 0.2940432109787451  | T | T | T |
|                           | 0.0835602202019996 | 0.1650729967406230  | 0.2047692510416992  | T | T | T |
|                           | 0.2500000000000000 | 0.9984235322000004  | 0.1155260000000027  | F | F | F |
|                           | 0.4166669999999968 | 0.0817565322000036  | 0.0259050000000016  | F | F | F |
|                           | 0.4177124894451403 | 0.0826105228151497  | 0.2939777499489967  | T | T | T |
|                           | 0.3336533246287390 | 0.1654810990875786  | 0.2048709817009267  | T | T | T |
|                           | 0.5000000000000000 | 0.9984235322000004  | 0.1155260000000027  | F | F | F |
|                           | 0.5025741117036785 | 0.0009552648879158  | 0.3837884216113994  | T | T | T |
|                           | 0.6666669999999968 | 0.0817565322000036  | 0.0259050000000016  | F | F | F |
|                           | 0.6669330237640245 | 0.0822336381551494  | 0.2943137988018782  | T | T | T |
|                           | 0.5837231173355049 | 0.1658402277298376  | 0.2054444042996166  | T | T | T |
|                           | 0.7500000000000000 | 0.9984235322000004  | 0.1155260000000027  | F | F | F |
|                           | 0.7499998529742877 | 0.9983827715491987  | 0.3837944190041935  | T | T | T |
|                           | 0.9166669999999968 | 0.0817565322000036  | 0.0259050000000016  | F | F | F |
|                           | 0.9163816510296510 | 0.0814164076460805  | 0.2939463225333164  | T | T | T |
|                           | 0.8333048799268138 | 0.1654938284466772  | 0.2048788440143615  | T | T | T |
|                           | 0.7506874909510606 | 0.4979093244425375  | 0.5272163711422024  | T | T | T |
| 2Pt/Cu(111) <sup>s2</sup> | 1.0000000000000000 |                     |                     |   |   |   |
|                           | 8.8905908144889398 | -5.1329849999999997 | 0.0000000000000000  |   |   |   |
|                           | 0.0000000000000000 | 10.2659699999999994 | 0.0000000000000000  |   |   |   |
|                           | 0.0000000000000000 | 0.0000000000000000  | 23.3821300000000001 |   |   |   |
|                           | C Pt Cu O          |                     |                     |   |   |   |
|                           | 1 2 78 1           |                     |                     |   |   |   |
|                           | Selective dynamics |                     |                     |   |   |   |
|                           | Direct             |                     |                     |   |   |   |
|                           | 0.4995636118365108 | 0.2516512563683406  | 0.4747699574867343  | T | T | T |
|                           | 0.4999281630667736 | 0.2501706745059784  | 0.3947351112319890  | T | T | T |
|                           | 0.5002609611927691 | 0.7502510128111395  | 0.3840402142454640  | T | T | T |
|                           | 0.0000000000000000 | 0.0000000000000000  | 0.1155260000000027  | F | F | F |
|                           | 0.9993552961884354 | 0.9997643427917425  | 0.3831086448575352  | T | T | T |
|                           | 0.1666669999999968 | 0.0833330000000032  | 0.0259050000000016  | F | F | F |
|                           | 0.1668912289966941 | 0.0835005669079640  | 0.2943985038042399  | T | T | T |
|                           | 0.0835762934612242 | 0.1667525263171417  | 0.2050726555135433  | T | T | T |
|                           | 0.2500000000000000 | 0.0000000000000000  | 0.1155260000000027  | F | F | F |
|                           | 0.2446592913229321 | 0.9958376168543619  | 0.3839635914558123  | T | T | T |
|                           | 0.4166669999999968 | 0.0833330000000032  | 0.0259050000000016  | F | F | F |
|                           | 0.4179700536615337 | 0.0857263253998325  | 0.2959295280704375  | T | T | T |
|                           | 0.3334738098689066 | 0.1667691750908783  | 0.2049907711776592  | T | T | T |
|                           | 0.5000000000000000 | 0.0000000000000000  | 0.1155260000000027  | F | F | F |

|                    |                    |                    |   |   |   |
|--------------------|--------------------|--------------------|---|---|---|
| 0.5001761052329629 | 0.9984548920245460 | 0.3854684835394123 | T | T | T |
| 0.6666669999999968 | 0.0833330000000032 | 0.0259050000000016 | F | F | F |
| 0.6666152654520187 | 0.0838253501497297 | 0.2948382094701558 | T | T | T |
| 0.5832999584638178 | 0.1667244719422385 | 0.2050462369550037 | T | T | T |
| 0.7500000000000000 | 0.0000000000000000 | 0.1155260000000027 | F | F | F |
| 0.7534575024058500 | 0.0020338802416661 | 0.3843848997110604 | T | T | T |
| 0.9166669999999968 | 0.0833330000000032 | 0.0259050000000016 | F | F | F |
| 0.9165204840448176 | 0.0835268479586370 | 0.2943031769327000 | T | T | T |
| 0.8329162309917115 | 0.1667365056288317 | 0.2051349803385724 | T | T | T |
| 0.0000000000000000 | 0.2500000000000000 | 0.1155260000000027 | F | F | F |
| 0.0000026174517599 | 0.2501373511285430 | 0.3828154825280901 | T | T | T |
| 0.1666669999999968 | 0.3333330000000032 | 0.0259050000000016 | F | F | F |
| 0.1670958403944015 | 0.3334383401810504 | 0.2943914862214665 | T | T | T |
| 0.0831517612877827 | 0.4165111623714244 | 0.2050072607901217 | T | T | T |
| 0.2500000000000000 | 0.2500000000000000 | 0.1155260000000027 | F | F | F |
| 0.2445975979418125 | 0.2490005885724981 | 0.3839181099391107 | T | T | T |
| 0.4166669999999968 | 0.3333330000000032 | 0.0259050000000016 | F | F | F |
| 0.4179283014672824 | 0.3324288899450085 | 0.2958634830674299 | T | T | T |
| 0.3338157154086288 | 0.4162398524459617 | 0.2053897401462344 | T | T | T |
| 0.5000000000000000 | 0.2500000000000000 | 0.1155260000000027 | F | F | F |
| 0.6666669999999968 | 0.3333330000000032 | 0.0259050000000016 | F | F | F |
| 0.6643010324761184 | 0.3322194266704344 | 0.2956828863019358 | T | T | T |
| 0.5833066601905122 | 0.4166521048672666 | 0.2050349218476255 | T | T | T |
| 0.7500000000000000 | 0.2500000000000000 | 0.1155260000000027 | F | F | F |
| 0.7548559489796778 | 0.2503626116662658 | 0.3839584049487589 | T | T | T |
| 0.9166669999999968 | 0.3333330000000032 | 0.0259050000000016 | F | F | F |
| 0.9160284886483822 | 0.3333672812264533 | 0.2943173733638723 | T | T | T |
| 0.8322541538320479 | 0.4161632889646014 | 0.2053869537208619 | T | T | T |
| 0.0000000000000000 | 0.5000000000000000 | 0.1155260000000027 | F | F | F |
| 0.0007910873008787 | 0.5004911162683117 | 0.3829819486724609 | T | T | T |
| 0.1666669999999968 | 0.5833330000000032 | 0.0259050000000016 | F | F | F |
| 0.1663446310310197 | 0.5832514804973411 | 0.2940738727927390 | T | T | T |
| 0.0831618465264543 | 0.6667347129727015 | 0.2050034846600417 | T | T | T |
| 0.2500000000000000 | 0.5000000000000000 | 0.1155260000000027 | F | F | F |
| 0.2470196671344107 | 0.4981356949951922 | 0.3841275443685182 | T | T | T |
| 0.4166669999999968 | 0.5833330000000032 | 0.0259050000000016 | F | F | F |
| 0.4157517659094069 | 0.5810412997575620 | 0.2935904282567956 | T | T | T |
| 0.3331598290303645 | 0.6666296593007974 | 0.2046934159698877 | T | T | T |
| 0.5000000000000000 | 0.5000000000000000 | 0.1155260000000027 | F | F | F |
| 0.5001762612149567 | 0.5020437863393262 | 0.3854033919477687 | T | T | T |
| 0.6666669999999968 | 0.5833330000000032 | 0.0259050000000016 | F | F | F |
| 0.6666249932331425 | 0.5829369248098722 | 0.2948056231366283 | T | T | T |
| 0.5834026121609874 | 0.6661774595329131 | 0.2048483212730439 | T | T | T |
| 0.7500000000000000 | 0.5000000000000000 | 0.1155260000000027 | F | F | F |
| 0.7549163316646285 | 0.5047568160758533 | 0.3839230376655649 | T | T | T |
| 0.9166669999999968 | 0.5833330000000032 | 0.0259050000000016 | F | F | F |
| 0.9160483870356596 | 0.5828064278418044 | 0.2943060044473944 | T | T | T |
| 0.8329266845154764 | 0.6662644002258410 | 0.2051238892714716 | T | T | T |
| 0.0000000000000000 | 0.7500000000000000 | 0.1155260000000027 | F | F | F |
| 0.0000268338091934 | 0.7500758122280736 | 0.3828177179697473 | T | T | T |
| 0.1666669999999968 | 0.8333330000000032 | 0.0259050000000016 | F | F | F |



|                           |                     |                     |                     |   |   |   |
|---------------------------|---------------------|---------------------|---------------------|---|---|---|
|                           | 0.1671148019297860  | 0.8338196726230342  | 0.2943993441466898  | T | T | T |
|                           | 0.0835809961293731  | 0.9169083649675291  | 0.2050718926503631  | T | T | T |
|                           | 0.2500000000000000  | 0.7500000000000000  | 0.1155260000000027  | F | F | F |
|                           | 0.2470393737094589  | 0.7491220482521329  | 0.3841399629735833  | T | T | T |
|                           | 0.4166669999999968  | 0.8333330000000032  | 0.0259050000000016  | F | F | F |
|                           | 0.4157530831570057  | 0.8348970309314078  | 0.2936001132706672  | T | T | T |
|                           | 0.3338320466840284  | 0.9176895769238078  | 0.2054059375607364  | T | T | T |
|                           | 0.5000000000000000  | 0.7500000000000000  | 0.1155260000000027  | F | F | F |
|                           | 0.6666669999999968  | 0.8333330000000032  | 0.0259050000000016  | F | F | F |
|                           | 0.6683972225158917  | 0.8342731914876612  | 0.2934947650207411  | T | T | T |
|                           | 0.5834048942404170  | 0.9173240221830020  | 0.2048568949079025  | T | T | T |
|                           | 0.7500000000000000  | 0.7500000000000000  | 0.1155260000000027  | F | F | F |
|                           | 0.7534494398261996  | 0.7516513528619824  | 0.3843680607013051  | T | T | T |
|                           | 0.9166669999999968  | 0.8333330000000032  | 0.0259050000000016  | F | F | F |
|                           | 0.9165236073626968  | 0.8331153749283069  | 0.2942971376450855  | T | T | T |
|                           | 0.8331835426013688  | 0.9166312407842564  | 0.2049269653877104  | T | T | T |
|                           | 0.4992598361202553  | 0.2528474233696433  | 0.5244778454334272  | T | T | T |
| 3Pt/Cu(111) <sup>s2</sup> | 1.0000000000000000  |                     |                     |   |   |   |
|                           | 8.8905908144889398  | -5.1329849999999997 | 0.0000000000000000  |   |   |   |
|                           | 0.0000000000000000  | 10.2659699999999994 | 0.0000000000000000  |   |   |   |
|                           | 0.0000000000000000  | 0.0000000000000000  | 23.3821300000000001 |   |   |   |
|                           | C Pt Cu O           |                     |                     |   |   |   |
|                           | 1 3 77 1            |                     |                     |   |   |   |
|                           | Selective dynamics  |                     |                     |   |   |   |
|                           | Direct              |                     |                     |   |   |   |
|                           | 0.2520688788991159  | 0.2499867263003400  | 0.4748953068665585  | T | T | T |
|                           | 0.2503150934979775  | 0.2501002261534613  | 0.3948382243120014  | T | T | T |
|                           | 0.7501396923997846  | 0.2498469851528328  | 0.3839864252870886  | T | T | T |
|                           | 0.7500892229229038  | 0.7501749369316320  | 0.3839637785687720  | T | T | T |
|                           | 0.0000000000000000  | 0.0000000000000000  | 0.1155260000000027  | F | F | F |
|                           | -0.0012790077162007 | 0.9980159409939628  | 0.3854748820905412  | T | T | T |
|                           | 0.1666669999999968  | 0.0833330000000032  | 0.0259050000000016  | F | F | F |
|                           | 0.1677819665626190  | 0.0857277723872008  | 0.2959197074641105  | T | T | T |
|                           | 0.0833826675308028  | 0.1666876957143610  | 0.2051620601301045  | T | T | T |
|                           | 0.2500000000000000  | 0.0000000000000000  | 0.1155260000000027  | F | F | F |
|                           | 0.2506436555487635  | 0.9954727611533662  | 0.3839071532346908  | T | T | T |
|                           | 0.4166669999999968  | 0.0833330000000032  | 0.0259050000000016  | F | F | F |
|                           | 0.4162353747828921  | 0.0833227904420573  | 0.2945897862901170  | T | T | T |
|                           | 0.3332687666992006  | 0.1667233002641240  | 0.2050751596286389  | T | T | T |
|                           | 0.5000000000000000  | 0.0000000000000000  | 0.1155260000000027  | F | F | F |
|                           | 0.4978840533618678  | 0.9970027117678408  | 0.3842564843131728  | T | T | T |
|                           | 0.6666669999999968  | 0.0833330000000032  | 0.0259050000000016  | F | F | F |
|                           | 0.6660269153422765  | 0.0816876351719290  | 0.2935501489744387  | T | T | T |
|                           | 0.5828021456257503  | 0.1665592045868942  | 0.2048089634632549  | T | T | T |
|                           | 0.7500000000000000  | 0.0000000000000000  | 0.1155260000000027  | F | F | F |
|                           | 0.7482799807767695  | 0.9991039069365991  | 0.3857969192582838  | T | T | T |
|                           | 0.9166669999999968  | 0.0833330000000032  | 0.0259050000000016  | F | F | F |
|                           | 0.9174153776114011  | 0.0836912889044012  | 0.2951198063534956  | T | T | T |
|                           | 0.8339813201710772  | 0.1665684097817189  | 0.2049113370451147  | T | T | T |
|                           | 0.0000000000000000  | 0.2500000000000000  | 0.1155260000000027  | F | F | F |
|                           | -0.0012384844623542 | 0.2506536097964009  | 0.3855085442387368  | T | T | T |

|                    |                    |                    |   |   |   |
|--------------------|--------------------|--------------------|---|---|---|
| 0.1666669999999968 | 0.3333330000000032 | 0.0259050000000016 | F | F | F |
| 0.1678074111182898 | 0.3319966617702350 | 0.2959637577718999 | T | T | T |
| 0.0838659303407579 | 0.4161399500929202 | 0.2054135949829027 | T | T | T |
| 0.2500000000000000 | 0.2500000000000000 | 0.1155260000000027 | F | F | F |
| 0.4166669999999968 | 0.3333330000000032 | 0.0259050000000016 | F | F | F |
| 0.4144111077529049 | 0.3321806103896132 | 0.2961108933992427 | T | T | T |
| 0.3332679859586617 | 0.4165281550023787 | 0.2050817662406434 | T | T | T |
| 0.5000000000000000 | 0.2500000000000000 | 0.1155260000000027 | F | F | F |
| 0.5014810246626750 | 0.2488640808392302 | 0.3853875557060737 | T | T | T |
| 0.6666669999999968 | 0.3333330000000032 | 0.0259050000000016 | F | F | F |
| 0.6653724420508346 | 0.3342070530778461 | 0.2936682692674313 | T | T | T |
| 0.5824263756903423 | 0.4161981105871086 | 0.2054256643957504 | T | T | T |
| 0.7500000000000000 | 0.2500000000000000 | 0.1155260000000027 | F | F | F |
| 0.9166669999999968 | 0.3333330000000032 | 0.0259050000000016 | F | F | F |
| 0.9191864047883914 | 0.3342239523620116 | 0.2935897571876885 | T | T | T |
| 0.8335512491655549 | 0.4169019033079516 | 0.2047469554464517 | T | T | T |
| 0.0000000000000000 | 0.5000000000000000 | 0.1155260000000027 | F | F | F |
| 0.0024082165525335 | 0.5028172352347066 | 0.3840953369677539 | T | T | T |
| 0.1666669999999968 | 0.5833330000000032 | 0.0259050000000016 | F | F | F |
| 0.1667107540129460 | 0.5828630959520225 | 0.2943794658621262 | T | T | T |
| 0.0834927631096208 | 0.6667309541889087 | 0.2050589153561505 | T | T | T |
| 0.2500000000000000 | 0.5000000000000000 | 0.1155260000000027 | F | F | F |
| 0.2506664214534558 | 0.5050783973541090 | 0.3839503381738675 | T | T | T |
| 0.4166669999999968 | 0.5833330000000032 | 0.0259050000000016 | F | F | F |
| 0.4162304906527084 | 0.5828666872295918 | 0.2946028489217837 | T | T | T |
| 0.3333168647706254 | 0.6663322202943678 | 0.2051094692592989 | T | T | T |
| 0.5000000000000000 | 0.5000000000000000 | 0.1155260000000027 | F | F | F |
| 0.5014366242152629 | 0.5025060167360751 | 0.3853983162938366 | T | T | T |
| 0.6666669999999968 | 0.5833330000000032 | 0.0259050000000016 | F | F | F |
| 0.6653412907945204 | 0.5810867656003653 | 0.2936657328515477 | T | T | T |
| 0.5827972527017721 | 0.6662116547190894 | 0.2048126745106828 | T | T | T |
| 0.7500000000000000 | 0.5000000000000000 | 0.1155260000000027 | F | F | F |
| 0.7509356707561404 | 0.5004287401573074 | 0.3855100769946262 | T | T | T |
| 0.9166669999999968 | 0.5833330000000032 | 0.0259050000000016 | F | F | F |
| 0.9170346541272243 | 0.5834859283056848 | 0.2942580334619774 | T | T | T |
| 0.8335377064406069 | 0.6666208877409107 | 0.2047468423541896 | T | T | T |
| 0.0000000000000000 | 0.7500000000000000 | 0.1155260000000027 | F | F | F |
| 0.0023677605314207 | 0.7495157166156532 | 0.3840877449147470 | T | T | T |
| 0.1666669999999968 | 0.8333330000000032 | 0.0259050000000016 | F | F | F |
| 0.1666947731860500 | 0.8337847050815868 | 0.2943695149943539 | T | T | T |
| 0.0838544855112201 | 0.9176923070308810 | 0.2054062948227764 | T | T | T |
| 0.2500000000000000 | 0.7500000000000000 | 0.1155260000000027 | F | F | F |
| 0.2500676779451437 | 0.7500037755730901 | 0.3826802722098437 | T | T | T |
| 0.4166669999999968 | 0.8333330000000032 | 0.0259050000000016 | F | F | F |
| 0.4165397857815835 | 0.8332530313764739 | 0.2943449026614437 | T | T | T |
| 0.3333167962629096 | 0.9169635974900321 | 0.2051052020198752 | T | T | T |
| 0.5000000000000000 | 0.7500000000000000 | 0.1155260000000027 | F | F | F |
| 0.4978787210914977 | 0.7508056571016045 | 0.3842596727926466 | T | T | T |
| 0.6666669999999968 | 0.8333330000000032 | 0.0259050000000016 | F | F | F |
| 0.6660182349275823 | 0.8343052918281755 | 0.2935475133210517 | T | T | T |
| 0.5834906834437407 | 0.9167409239160259 | 0.2049221597681130 | T | T | T |

|                           |                    |                     |                     |   |   |   |
|---------------------------|--------------------|---------------------|---------------------|---|---|---|
|                           | 0.7500000000000000 | 0.7500000000000000  | 0.1155260000000027  | F | F | F |
|                           | 0.9166669999999968 | 0.8333330000000032  | 0.0259050000000016  | F | F | F |
|                           | 0.9191621909711337 | 0.8349008850411525  | 0.2935773713019745  | T | T | T |
|                           | 0.8339877087053158 | 0.9174036716041337  | 0.2049097430731851  | T | T | T |
|                           | 0.2537310488564060 | 0.2499318234364835  | 0.5245972724215825  | T | T | T |
| 4Pt/Cu(111) <sup>S2</sup> | 1.0000000000000000 |                     |                     |   |   |   |
|                           | 8.8905908144889398 | -5.1329849999999997 | 0.0000000000000000  |   |   |   |
|                           | 0.0000000000000000 | 10.2659699999999994 | 0.0000000000000000  |   |   |   |
|                           | 0.0000000000000000 | 0.0000000000000000  | 23.3821300000000001 |   |   |   |
|                           | C                  | Pt                  | Cu                  | O |   |   |
|                           | 1                  | 4                   | 76                  | 1 |   |   |
|                           | Selective dynamics |                     |                     |   |   |   |
|                           | Direct             |                     |                     |   |   |   |
|                           | 0.7474816812383289 | 0.7492991279871259  | 0.4745250110641917  | T | T | T |
|                           | 0.2497010921677332 | 0.2498918051832159  | 0.3837582001453200  | T | T | T |
|                           | 0.7498660170322182 | 0.2499169862438494  | 0.3837613936003839  | T | T | T |
|                           | 0.2497023093146035 | 0.7497676157232561  | 0.3837505605888912  | T | T | T |
|                           | 0.7497095853812452 | 0.7498430229226308  | 0.3944700891867539  | T | T | T |
|                           | 0.0000000000000000 | 0.0000000000000000  | 0.1155260000000027  | F | F | F |
|                           | 0.0014036597477439 | 0.0018489777803471  | 0.3854311790227255  | T | T | T |
|                           | 0.1666669999999968 | 0.0833330000000032  | 0.0259050000000016  | F | F | F |
|                           | 0.1651339378981180 | 0.0809462761321916  | 0.2935866878153486  | T | T | T |
|                           | 0.0826190376775382 | 0.1660860625413222  | 0.2048604048775366  | T | T | T |
|                           | 0.2500000000000000 | 0.0000000000000000  | 0.1155260000000027  | F | F | F |
|                           | 0.2500102559817097 | -0.0000101828005388 | 0.3855060132364709  | T | T | T |
|                           | 0.4166669999999968 | 0.0833330000000032  | 0.0259050000000016  | F | F | F |
|                           | 0.4165733372393842 | 0.0832889286415980  | 0.2945189941883057  | T | T | T |
|                           | 0.3334196749622527 | 0.1665310954020485  | 0.2048133330289445  | T | T | T |
|                           | 0.5000000000000000 | 0.0000000000000000  | 0.1155260000000027  | F | F | F |
|                           | 0.4996719847621710 | -0.0000166468560798 | 0.3855003478386231  | T | T | T |
|                           | 0.6666669999999968 | 0.0833330000000032  | 0.0259050000000016  | F | F | F |
|                           | 0.6656808702558862 | 0.0809712113531369  | 0.2935852092537601  | T | T | T |
|                           | 0.5830379593816779 | 0.1665276630545299  | 0.2048155293894426  | T | T | T |
|                           | 0.7500000000000000 | 0.0000000000000000  | 0.1155260000000027  | F | F | F |
|                           | 0.7502005590847081 | 0.0019090846662100  | 0.3853874056217400  | T | T | T |
|                           | 0.9166669999999968 | 0.0833330000000032  | 0.0259050000000016  | F | F | F |
|                           | 0.9162442590654646 | 0.0825991538716597  | 0.2948713884972350  | T | T | T |
|                           | 0.8334106525443374 | 0.1661041735945075  | 0.2048614543829119  | T | T | T |
|                           | 0.0000000000000000 | 0.2500000000000000  | 0.1155260000000027  | F | F | F |
|                           | 0.0002857572466972 | 0.2508870090344467  | 0.3857183279112933  | T | T | T |
|                           | 0.1666669999999968 | 0.3333330000000032  | 0.0259050000000016  | F | F | F |
|                           | 0.1657491361322431 | 0.3341211756500131  | 0.2935663401074706  | T | T | T |
|                           | 0.0832934385574244 | 0.4166599674458628  | 0.2048871172474304  | T | T | T |
|                           | 0.2500000000000000 | 0.2500000000000000  | 0.1155260000000027  | F | F | F |
|                           | 0.4166669999999968 | 0.3333330000000032  | 0.0259050000000016  | F | F | F |
|                           | 0.4188661191476772 | 0.3346904780961203  | 0.2935932111871928  | T | T | T |
|                           | 0.3338644137481344 | 0.4173310320909009  | 0.2048548292851577  | T | T | T |
|                           | 0.5000000000000000 | 0.2500000000000000  | 0.1155260000000027  | F | F | F |
|                           | 0.4996750108518601 | 0.2496690425599608  | 0.3855041838305800  | T | T | T |
|                           | 0.6666669999999968 | 0.3333330000000032  | 0.0259050000000016  | F | F | F |
|                           | 0.6656786916554269 | 0.3347099325247043  | 0.2935906613518980  | T | T | T |

|                    |                    |                    |   |   |   |
|--------------------|--------------------|--------------------|---|---|---|
| 0.5837832717605076 | 0.4176283694600260 | 0.2053795559897143 | T | T | T |
| 0.7500000000000000 | 0.2500000000000000 | 0.1155260000000027 | F | F | F |
| 0.9166669999999968 | 0.3333330000000032 | 0.0259050000000016 | F | F | F |
| 0.9182249577814691 | 0.3341185476624892 | 0.2935811345911387 | T | T | T |
| 0.8334139817079241 | 0.4173424186565020 | 0.2048643824747407 | T | T | T |
| 0.0000000000000000 | 0.5000000000000000 | 0.1155260000000027 | F | F | F |
| 0.0002792238536970 | 0.4993780116233127 | 0.3857015946375295 | T | T | T |
| 0.1666669999999968 | 0.5833330000000032 | 0.0259050000000016 | F | F | F |
| 0.1657512297009776 | 0.5816404286990849 | 0.2935622968184627 | T | T | T |
| 0.0826149363257032 | 0.6665498796488367 | 0.2048599927819680 | T | T | T |
| 0.2500000000000000 | 0.5000000000000000 | 0.1155260000000027 | F | F | F |
| 0.2487974037607315 | 0.4993825652318585 | 0.3856951003589926 | T | T | T |
| 0.4166669999999968 | 0.5833330000000032 | 0.0259050000000016 | F | F | F |
| 0.4172720988978474 | 0.5836334121754790 | 0.2948451271835410 | T | T | T |
| 0.3338548236463540 | 0.6665586408135319 | 0.2048519319511461 | T | T | T |
| 0.5000000000000000 | 0.5000000000000000 | 0.1155260000000027 | F | F | F |
| 0.4977498049893526 | 0.4982012038080558 | 0.3853825829804256 | T | T | T |
| 0.6666669999999968 | 0.5833330000000032 | 0.0259050000000016 | F | F | F |
| 0.6677414447018495 | 0.5856241763494644 | 0.2959897067859620 | T | T | T |
| 0.5833945212755972 | 0.6667016848932670 | 0.2051334181825755 | T | T | T |
| 0.7500000000000000 | 0.5000000000000000 | 0.1155260000000027 | F | F | F |
| 0.7501930324561717 | 0.4982601725595886 | 0.3854041763040374 | T | T | T |
| 0.9166669999999968 | 0.5833330000000032 | 0.0259050000000016 | F | F | F |
| 0.9162368745391472 | 0.5836514180967312 | 0.2948722747093250 | T | T | T |
| 0.8332592959650537 | 0.6667109471735152 | 0.2051415989843662 | T | T | T |
| 0.0000000000000000 | 0.7500000000000000 | 0.1155260000000027 | F | F | F |
| 0.0014008773716238 | 0.7495249534929054 | 0.3854410352710052 | T | T | T |
| 0.1666669999999968 | 0.8333330000000032 | 0.0259050000000016 | F | F | F |
| 0.1651421514333365 | 0.8341923132656440 | 0.2935892118074538 | T | T | T |
| 0.0823012009488592 | 0.9161587413438099 | 0.2053863343107038 | T | T | T |
| 0.2500000000000000 | 0.7500000000000000 | 0.1155260000000027 | F | F | F |
| 0.4166669999999968 | 0.8333330000000032 | 0.0259050000000016 | F | F | F |
| 0.4188668092516204 | 0.8341846520264139 | 0.2935891110047982 | T | T | T |
| 0.3334297512242578 | 0.9169238326711553 | 0.2048136732247977 | T | T | T |
| 0.5000000000000000 | 0.7500000000000000 | 0.1155260000000027 | F | F | F |
| 0.4977497727285259 | 0.7495182200073697 | 0.3853622464605518 | T | T | T |
| 0.6666669999999968 | 0.8333330000000032 | 0.0259050000000016 | F | F | F |
| 0.6677430151034160 | 0.8321252948469828 | 0.2959733608918482 | T | T | T |
| 0.5837821959195255 | 0.9161765679148356 | 0.2053722016651840 | T | T | T |
| 0.7500000000000000 | 0.7500000000000000 | 0.1155260000000027 | F | F | F |
| 0.9166669999999968 | 0.8333330000000032 | 0.0259050000000016 | F | F | F |
| 0.9141690582572943 | 0.8320844192711216 | 0.2960414099057148 | T | T | T |
| 0.8332700855492918 | 0.9165757070709287 | 0.2051409170259741 | T | T | T |
| 0.7456005197608353 | 0.7488818349010390 | 0.5242213096920402 | T | T | T |
