# Supplementary material for: Single atom alloys vs. phase separated alloys in Cu, Ag, and Au atoms with Ni(111) and Ni, Pd, and Pt atoms with Cu(111): a theoretical exploration
Source: Royal Society of Chemistry journal article supplement (doi:10.1039/d2cp00578f), 2022-01-01
Supplement: d2cp00578f2.pdf [file d2cp00578f2.pdf]

## Supplementary Information

### **Single Atom Alloy vs Phase Separated Alloy in Cu, Ag, and Au atoms with Ni(111) and Ni, Pd, and Pt atoms with Cu(111): Theoretical Exploration**

Junqing Yin,<sup>†</sup> Masahiro Ehara,<sup>†, ‡</sup> and Shigeyoshi Sakaki<sup>†\*</sup>

<sup>†</sup> Elements Strategy Initiative for Catalysts and Batteries (ESICB), Kyoto University, Goryo-Ohara 1-30, Nishikyo-ku, Kyoto 615-8245, Japan

<sup>‡</sup> Institute for Molecular Science (IMS), Okazaki 444-8585, Japan

#### **Corresponding Author**

E-mails: sakaki.shigeyoshi.47e@st.kyoto-u.ac.jp. Phone: +81-75-383-3036

# Table of Contents

|                                                                                                                                                                           |          |
|---------------------------------------------------------------------------------------------------------------------------------------------------------------------------|----------|
| 1. Effects of D3 correction on the CO adsorption and the relative energies of alloys: <b>Tables S1 and S2</b> .....                                                       | Page S3  |
| 2. Geometries and relative stabilities of nX/M(111) alloy with X at the surface and the inside: <b>Scheme S1 and Table S3</b> .....                                       | Page S4  |
| 3. Various possible geometries and relative energies of SAA and PSA: <b>Figures S1 ~ S6</b> ...                                                                           | Page S7  |
| 4. The geometries of the SAA and PSA explored in this work: <b>Scheme S2</b> .....                                                                                        | Page S13 |
| 5. Geometries of nX/M(111) employed in Tables 2, 3, S4, and S5: <b>Scheme S3</b> .....                                                                                    | Page S14 |
| 6. Energy changes in SAA formation and PSA formation from M(111) and nX atoms: <b>Tables S4 and S5</b> .....                                                              | Page S15 |
| 7. The Bader charge of nX atoms and X <sub>n</sub> cluster, the Fermi level, <i>d</i> band center of nX/M(111): <b>Tables S6 ~ S8</b> .....                               | Page S21 |
| 8. PDOSs of M(111) and nX/M(111): <b>Figures S7 ~ S14</b> .....                                                                                                           | Page S24 |
| 9. Spin density of M around X in nX/M(111): <b>Table S9</b> .....                                                                                                         | Page S30 |
| 10. A-B bond strength and valence orbital energies of A and B: <b>Scheme S4</b> .....                                                                                     | Page S31 |
| 11. Frontier orbitals of X <sub>n</sub> clusters: <b>Figures S15 ~ S17</b> .....                                                                                          | Page S32 |
| 12. Adsorption sites, adsorption energy, and the Bader charge of CO adsorbed to the surfaces of M(111) and nX/M(111): <b>Schemes S5 and S6 and Tables S10 ~ S12</b> ..... | Page S35 |

13. The adsorption energy ( $E_{\text{ads}(\text{CO})}$  in eV) and C-O bond stretching vibration frequency ( $\nu_{(\text{C-O})}$  in  $\text{cm}^{-1}$ ) of CO at the hollow site of Ni(111) and Cu(111): **Table S13**.....Page S39

## 1. Effects of D3 correction on the CO adsorption and the relative energies of alloys.

**Table S1.** Influences of D3 correction on the C-O and M-C distances ( $d_{C-O}$  and  $d_{M-C}$  in Å) of CO adsorbed at the hollow site on the M(111) surfaces (M = Ni, Cu)

| CO at H site | $d_{C-O}$ |              | $d_{M-C}$             |                       |
|--------------|-----------|--------------|-----------------------|-----------------------|
|              | PBE       | PBE + D3(BJ) | PBE                   | PBE + D3(BJ)          |
| Ni(111)      | 1.196     | 1.195        | 1.948 / 1.946 / 1.946 | 1.943 / 1.943 / 1.943 |
| Cu(111)      | 1.185     | 1.184        | 2.045 / 2.046 / 2.045 | 2.043 / 2.041 / 2.041 |

**Table S2.** Influences of D3 correction on relative energies of the SAA and PSA, where the 2Cu/Ni(111) and 3Cu/Ni(111) were calculated as examples.

| nCu/Ni(111) |           | RE / eV |            |
|-------------|-----------|---------|------------|
|             |           | PBE     | PBE+D3(BJ) |
| 2Cu/Ni(111) | SAA_2Cu_1 | 0       | 0          |
|             | SAA_2Cu_2 | 0.020   | 0.019      |
|             | PSA_2Cu   | -0.013  | -0.014     |
| 3Cu/Ni(111) | SAA_3Cu_1 | 0       | 0.000      |
|             | SAA_3Cu_2 | 0.060   | 0.057      |
|             | PSA_3Cu_C | -0.032  | -0.035     |
|             | PSA_3Cu_L | -0.023  | -0.025     |

## 2. Geometries and relative stabilities of nX/M(111) alloy with X at the surface and the inside

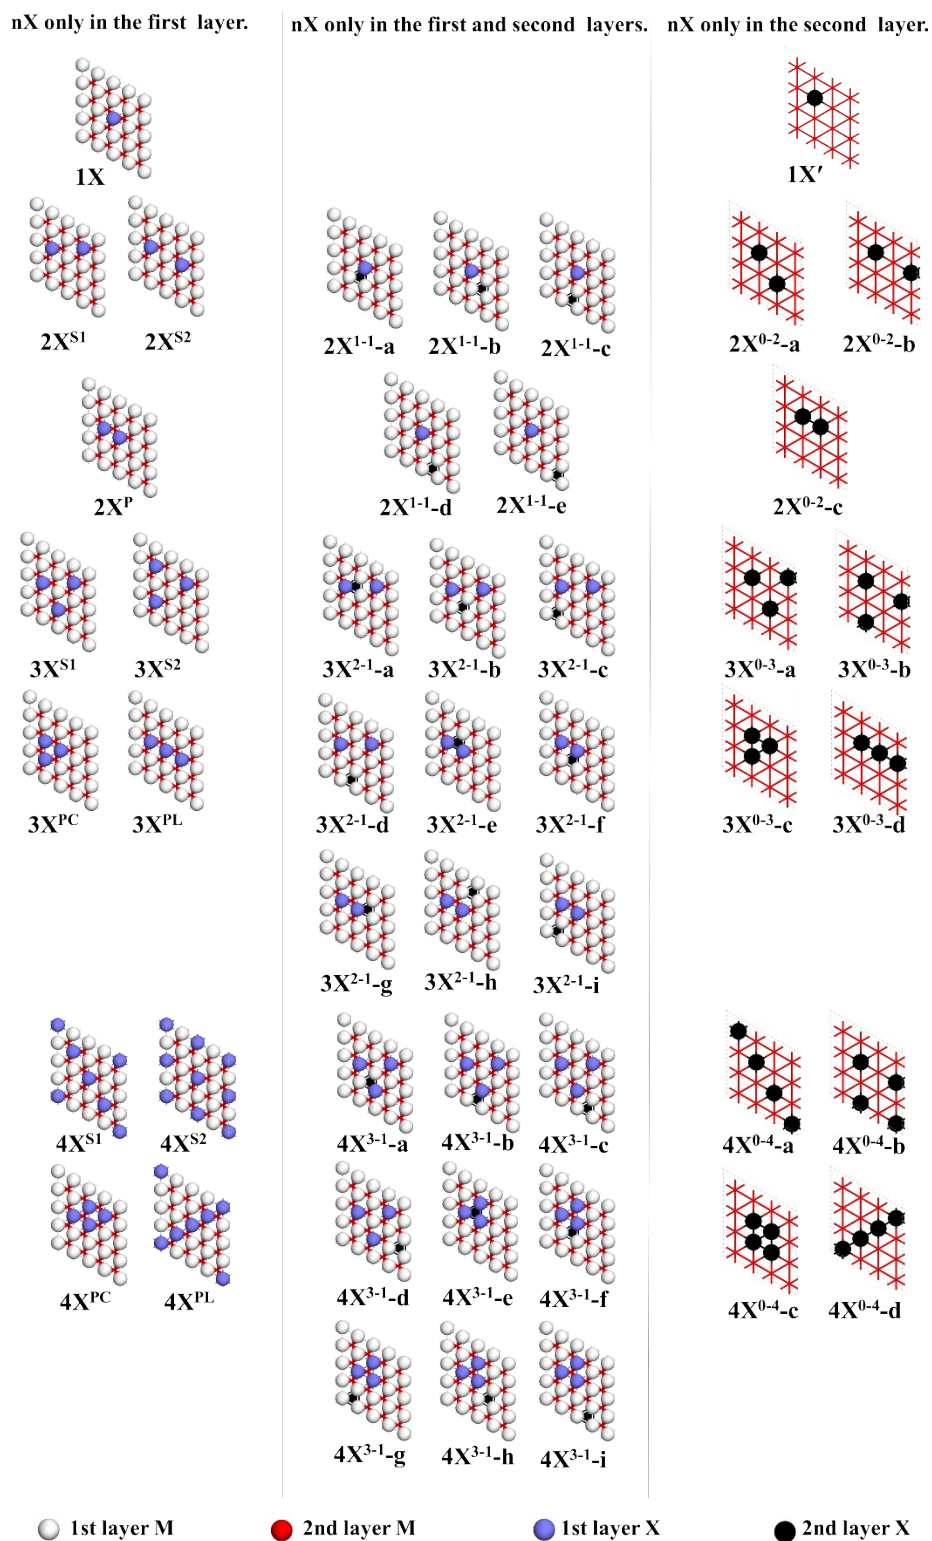

**Scheme S1.** Geometries of nX/M(111) ( $n = 1 \sim 4$ ) with nX atoms in the first and/or second layers.

**Table S3.** Relative energies ( $\Delta E$  in eV) of the  $nX/M(111)$  ( $n = 1 \sim 4$ ) alloys geometries in Scheme S2. The  $\Delta E$  is calculated with the total energy of the most stable SAA structure as reference.

| Distribution of $nX$ atoms                 |                                            |                        | nX/Ni(111)       |        |        | nX/Cu(111) |        |        |
|--------------------------------------------|--------------------------------------------|------------------------|------------------|--------|--------|------------|--------|--------|
|                                            |                                            |                        | X = Cu           | X = Ag | X = Au | X = Ni     | X = Pd | X = Pt |
| n = 1                                      | 1 <sup>st</sup> -layer                     | 1X                     | 0                | 0      | 0      | 0          | 0      | 0      |
|                                            | 2 <sup>nd</sup> -layer                     | 1X'                    | 0.238            | 1.114  | 1.112  | -0.199     | 0.166  | 0.183  |
| n = 2                                      | 1 <sup>st</sup> -layer                     | 2X <sup>S1</sup>       | 0                | 0      | 0      | 0          | 0      | 0.007  |
|                                            |                                            | 2X <sup>S2</sup>       | 0.020            | 0.070  | 0.055  | 0.008      | 0.019  | 0      |
|                                            |                                            | 2X <sup>P</sup>        | -0.013           | 0.003  | 0.086  | 0.006      | 0.084  | 0.123  |
|                                            |                                            | 2a                     | 0.210            | 0.833  | 0.971  | -0.186     | 0.245  | 0.368  |
|                                            | 1 <sup>st</sup> +2 <sup>nd</sup><br>layer2 | 2b                     | 0.240            | 1.072  | 1.062  | -0.185     | 0.154  | 0.194  |
|                                            |                                            | 2c                     | 0.231            | 1.090  | 1.116  | -0.187     | 0.183  | 0.193  |
|                                            |                                            | 2d                     | 0.235            | 1.068  | 1.117  | -0.197     | 0.169  | 0.186  |
|                                            |                                            | 2e                     | 0.235            | 1.068  | 1.117  | -0.197     | 0.169  | 0.186  |
|                                            | 2 <sup>nd</sup> -layer                     | 2X <sup>S1'</sup>      | 0.468            | 2.206  | 2.279  | -0.377     | 0.367  | 0.404  |
|                                            |                                            | 2X <sup>S2'</sup>      | 0.462            | 2.267  | 2.343  | -0.391     | 0.351  | 0.356  |
|                                            |                                            | 2X <sup>P'</sup>       | 0.456            | 2.131  | 2.342  | -0.369     | 0.432  | 0.526  |
|                                            | n = 3                                      | 1 <sup>st</sup> -layer | 3X <sup>S1</sup> | 0      | 0      | 0          | 0      | 0      |
| 3X <sup>S2</sup>                           |                                            |                        | 0.06             | 0.174  | 0.128  | 0.021      | 0.051  | 0      |
| 3X <sup>PC</sup>                           |                                            |                        | -0.032           | -0.009 | 0.188  | 0.003      | 0.213  | 0.314  |
| 3X <sup>PL</sup>                           |                                            |                        | -0.023           | 0.071  | 0.281  | 0.023      | 0.229  | 0.304  |
| 1 <sup>st</sup> +2 <sup>nd</sup><br>layers |                                            | 3a                     | 0.221            | 0.790  | 0.849  | -0.179     | 0.218  | 0.373  |
|                                            |                                            | 3b                     | 0.237            | 1.052  | 1.009  | -0.177     | 0.163  | 0.212  |
|                                            |                                            | 3c                     | 0.227            | 1.054  | 1.050  | -0.187     | 0.179  | 0.205  |
|                                            |                                            | 3d                     | 0.247            | 1.065  | 1.075  | -0.201     | 0.148  | 0.181  |
|                                            |                                            | 3e                     | 0.170            | 0.541  | 0.844  | -0.190     | 0.369  | 0.590  |
|                                            |                                            | 3f                     | 0.202            | 0.780  | 0.929  | -0.172     | 0.307  | 0.496  |
|                                            |                                            | 3g                     | 0.196            | 0.790  | 0.968  | -0.181     | 0.333  | 0.493  |
|                                            |                                            | 3h                     | 0.226            | 1.043  | 1.084  | -0.172     | 0.243  | 0.327  |
|                                            |                                            | 3i                     | 0.216            | 1.049  | 1.128  | -0.189     | 0.241  | 0.299  |

|       |                                            |                   |        |        |       |        |       |       |
|-------|--------------------------------------------|-------------------|--------|--------|-------|--------|-------|-------|
|       | 2 <sup>nd</sup> -layer                     | 3j                | 0.220  | 1.046  | 1.140 | -0.179 | 0.247 | 0.373 |
|       |                                            | 3X <sup>S1'</sup> | 0.697  | 3.312  | 3.396 | -0.544 | 0.586 | 0.656 |
|       |                                            | 3X <sup>S2'</sup> | 0.683  | 3.474  | 3.561 | -0.583 | 0.537 | 0.515 |
|       |                                            | 3X <sup>PC'</sup> | 0.668  | 3.090  | 3.538 | -0.549 | 0.709 | 0.907 |
|       |                                            | 3X <sup>PL'</sup> | 0.654  | 3.181  | 3.621 | -0.540 | 0.719 | 0.900 |
| n = 4 | 1 <sup>st</sup> -layer                     | 4X <sup>S1</sup>  | 0      | 0      | 0     | 0      | 0     | 0.038 |
|       |                                            | 4X <sup>S2</sup>  | 0.071  | 0.206  | 0.156 | 0.028  | 0.061 | 0     |
|       |                                            | 4X <sup>PC</sup>  | -0.109 | -0.132 | 0.229 | -0.022 | 0.328 | 0.523 |
|       |                                            | 4X <sup>PL</sup>  | -0.113 | 0.163  | 0.761 | 0.046  | 0.517 | 0.752 |
|       | 1 <sup>st</sup> +2 <sup>nd</sup><br>layers | 4a                | 0.168  | 0.688  | 0.738 | -0.190 | 0.179 | 0.391 |
|       |                                            | 4b                | 0.175  | 0.663  | 0.780 | -0.185 | 0.126 | 0.232 |
|       |                                            | 4c                | 0.189  | 0.914  | 0.885 | -0.211 | 0.170 | 0.368 |
|       |                                            | 4d                | 0.190  | 0.914  | 0.885 | -0.194 | 0.115 | 0.229 |
|       |                                            | 4e                | 0.076  | 0.088  | 0.661 | -0.233 | 0.478 | 0.825 |
|       |                                            | 4f                | 0.137  | 0.627  | 0.882 | -0.191 | 0.398 | 0.687 |
|       |                                            | 4g                | 0.164  | 0.933  | 1.121 | -0.201 | 0.337 | 0.496 |
|       |                                            | 4h                | 0.165  | 0.891  | 1.079 | -0.199 | 0.319 | 0.529 |
|       |                                            | 4i                | 0.165  | 0.893  | 1.082 | -0.199 | 0.319 | 0.528 |
|       | 2 <sup>nd</sup> -layer                     | 4X <sup>S1'</sup> | 0.869  | 4.235  | 4.483 | -0.731 | 0.810 | 1.019 |
|       |                                            | 4X <sup>S2'</sup> | 0.863  | 4.394  | 4.509 | -0.748 | 0.736 | 0.823 |
|       |                                            | 4X <sup>PC'</sup> | 0.826  | 3.905  | 4.629 | -0.770 | 0.920 | 1.290 |
|       |                                            | 4X <sup>PL'</sup> | 0.804  | 4.012  | 5.004 | -0.708 | 1.126 | 1.602 |

### 3. Various possible geometries and relative energies of SAA and PSA

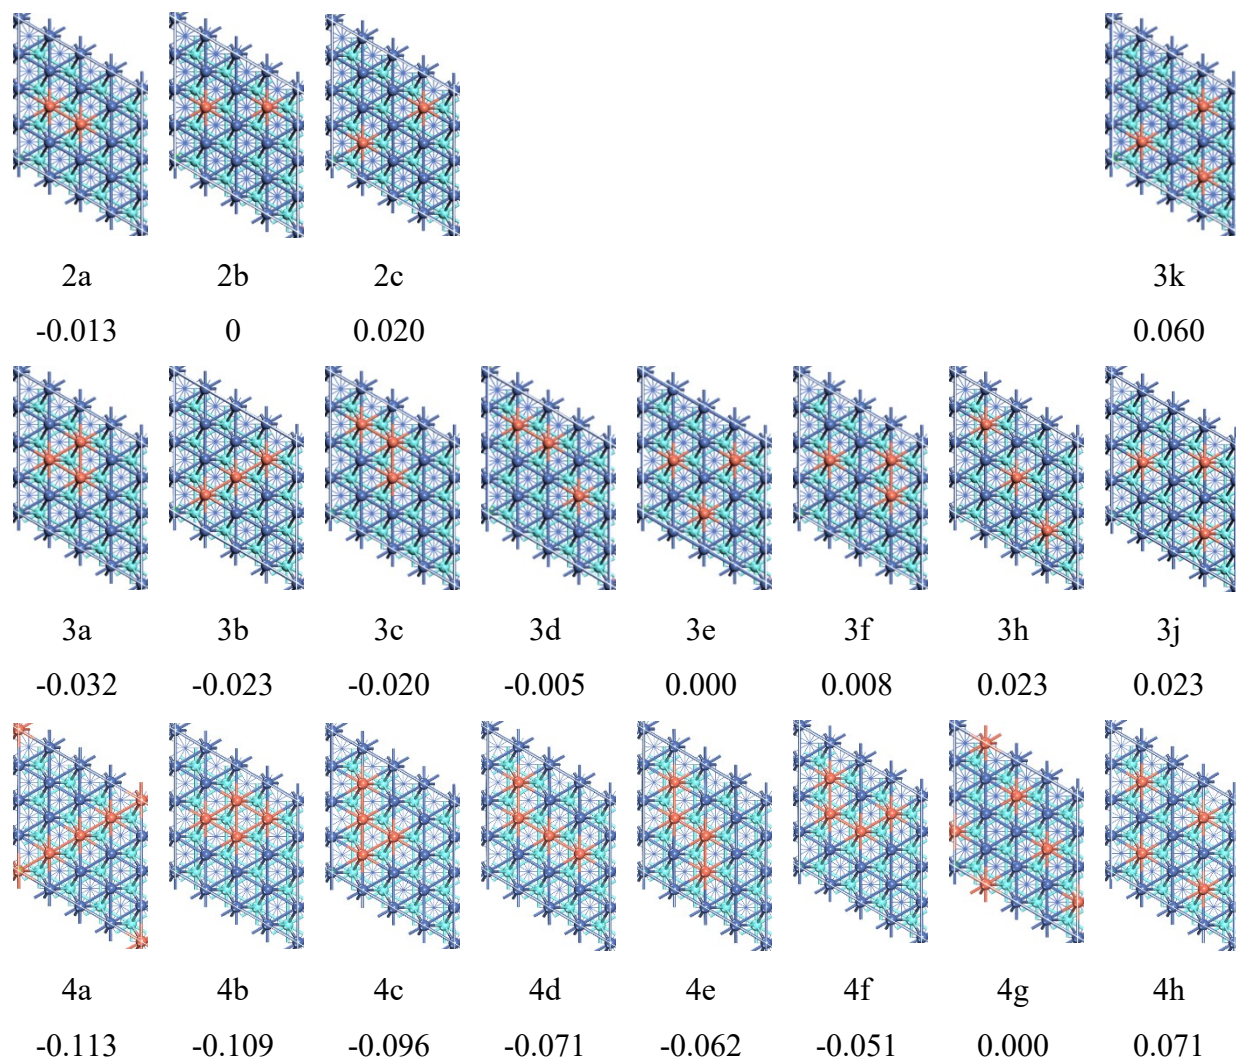

**Figure S1.** Various geometries and relative energies (in eV) of  $n\text{Cu}/\text{Ni}(111)$  ( $n = 2 \sim 4$ )



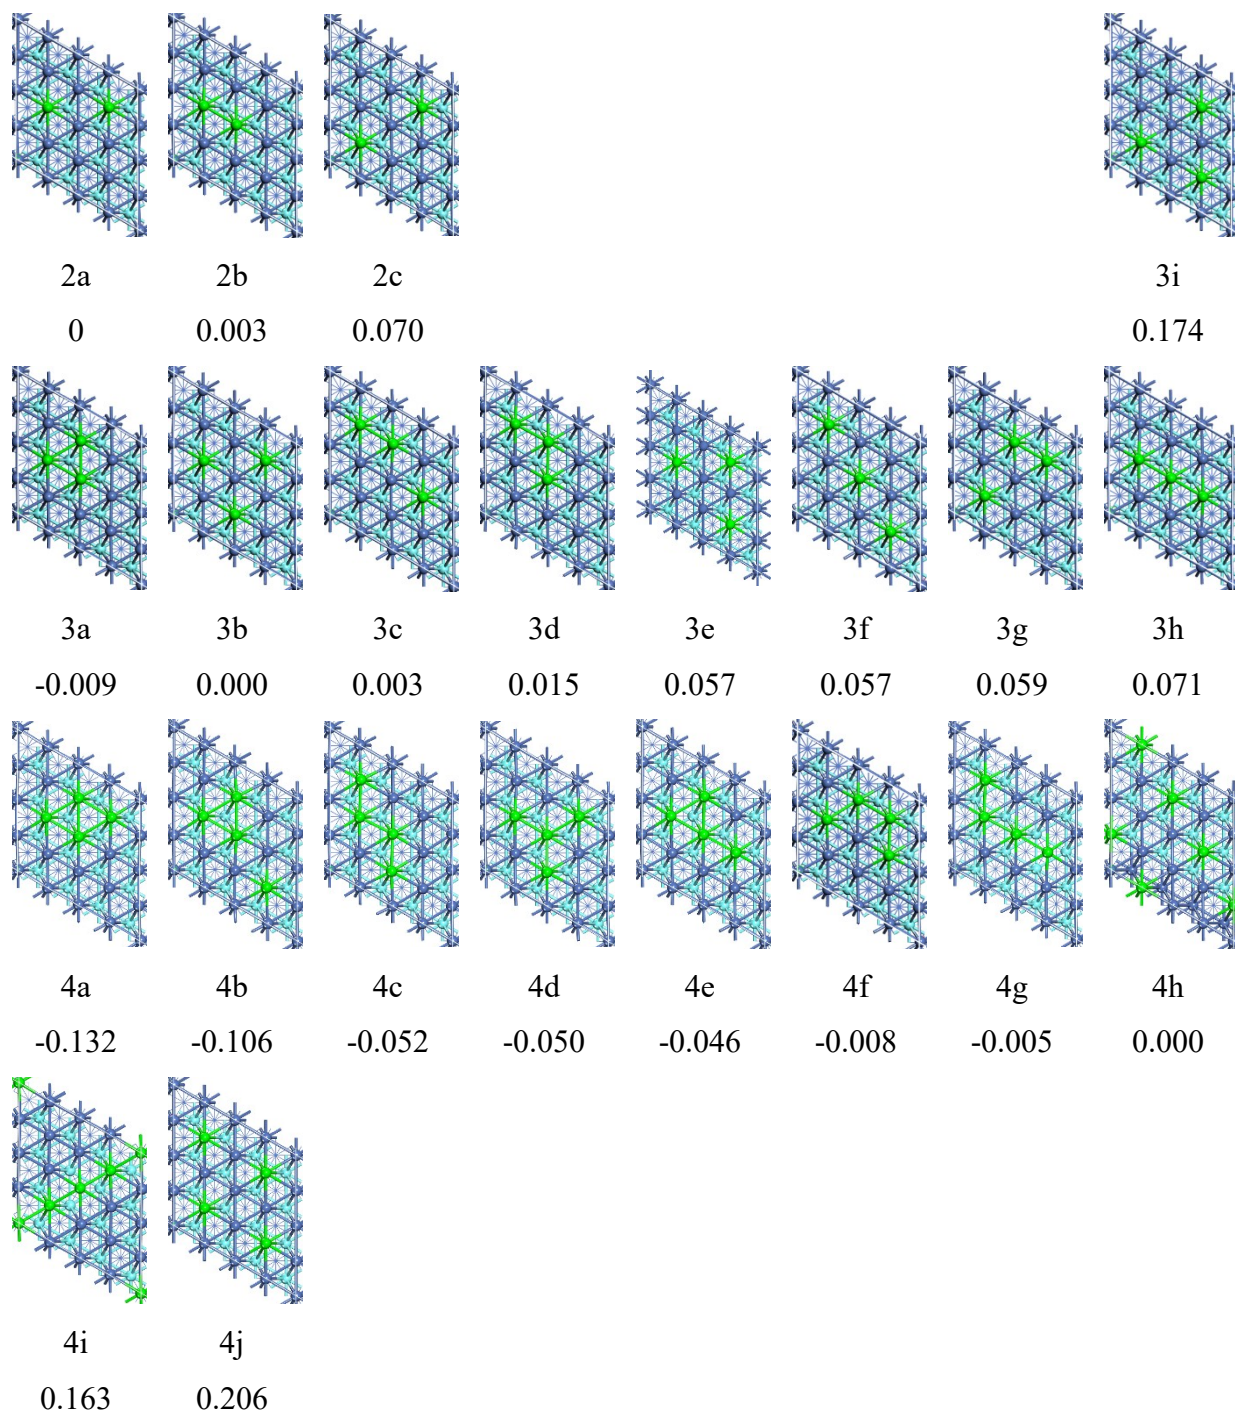

**Figure S2.** Various geometries and relative energies (in eV) of  $n\text{Ag}/\text{Ni}(111)$  ( $n = 2 \sim 4$ ).

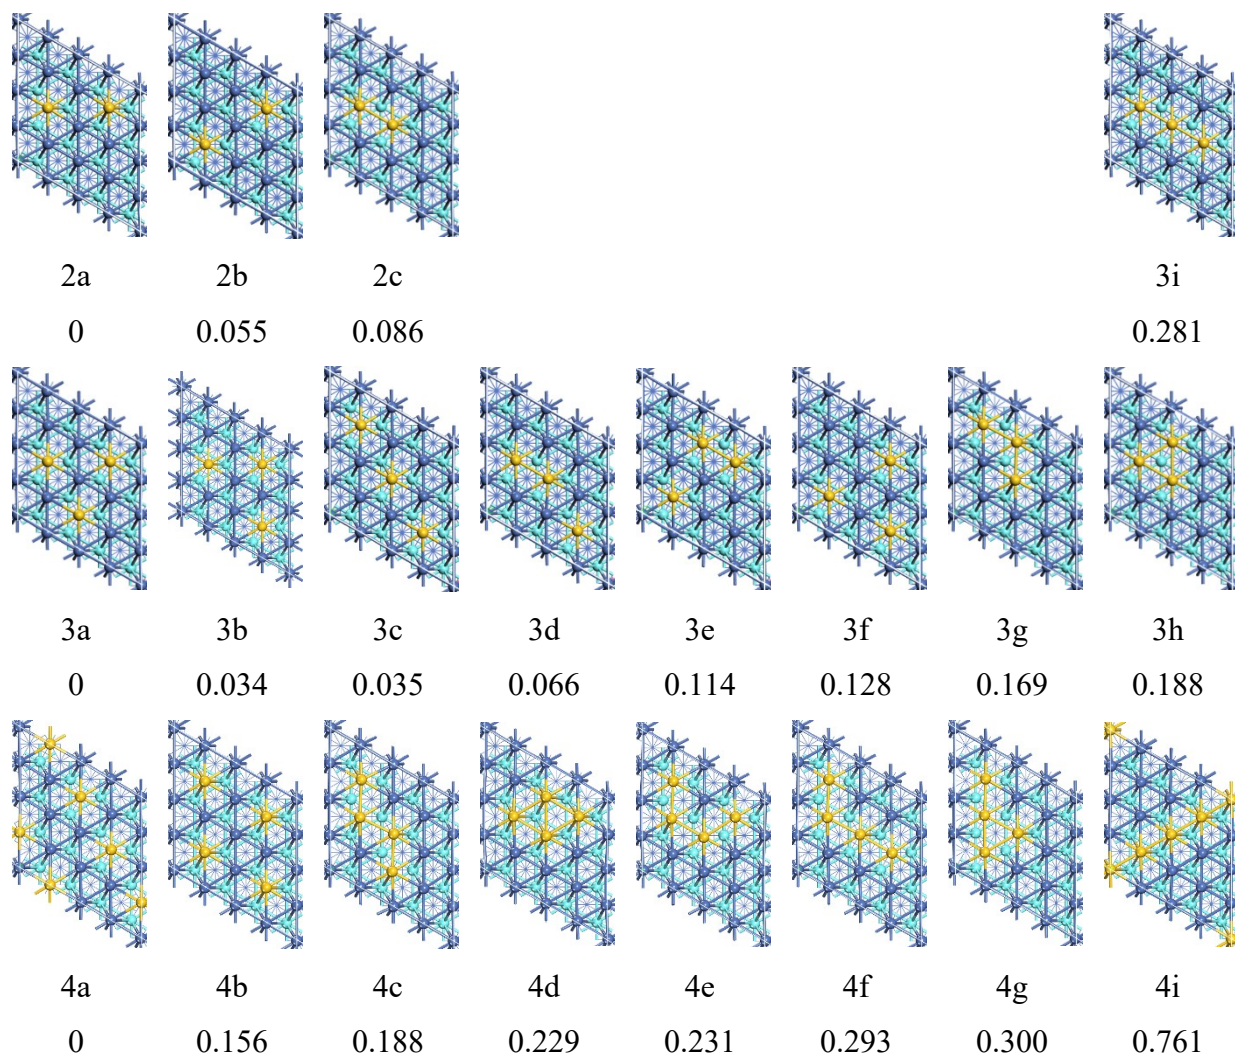

**Figure S3.** Various geometries and relative energies (in eV) of  $n\text{Au}/\text{Ni}(111)$  ( $n = 2 \sim 4$ ).

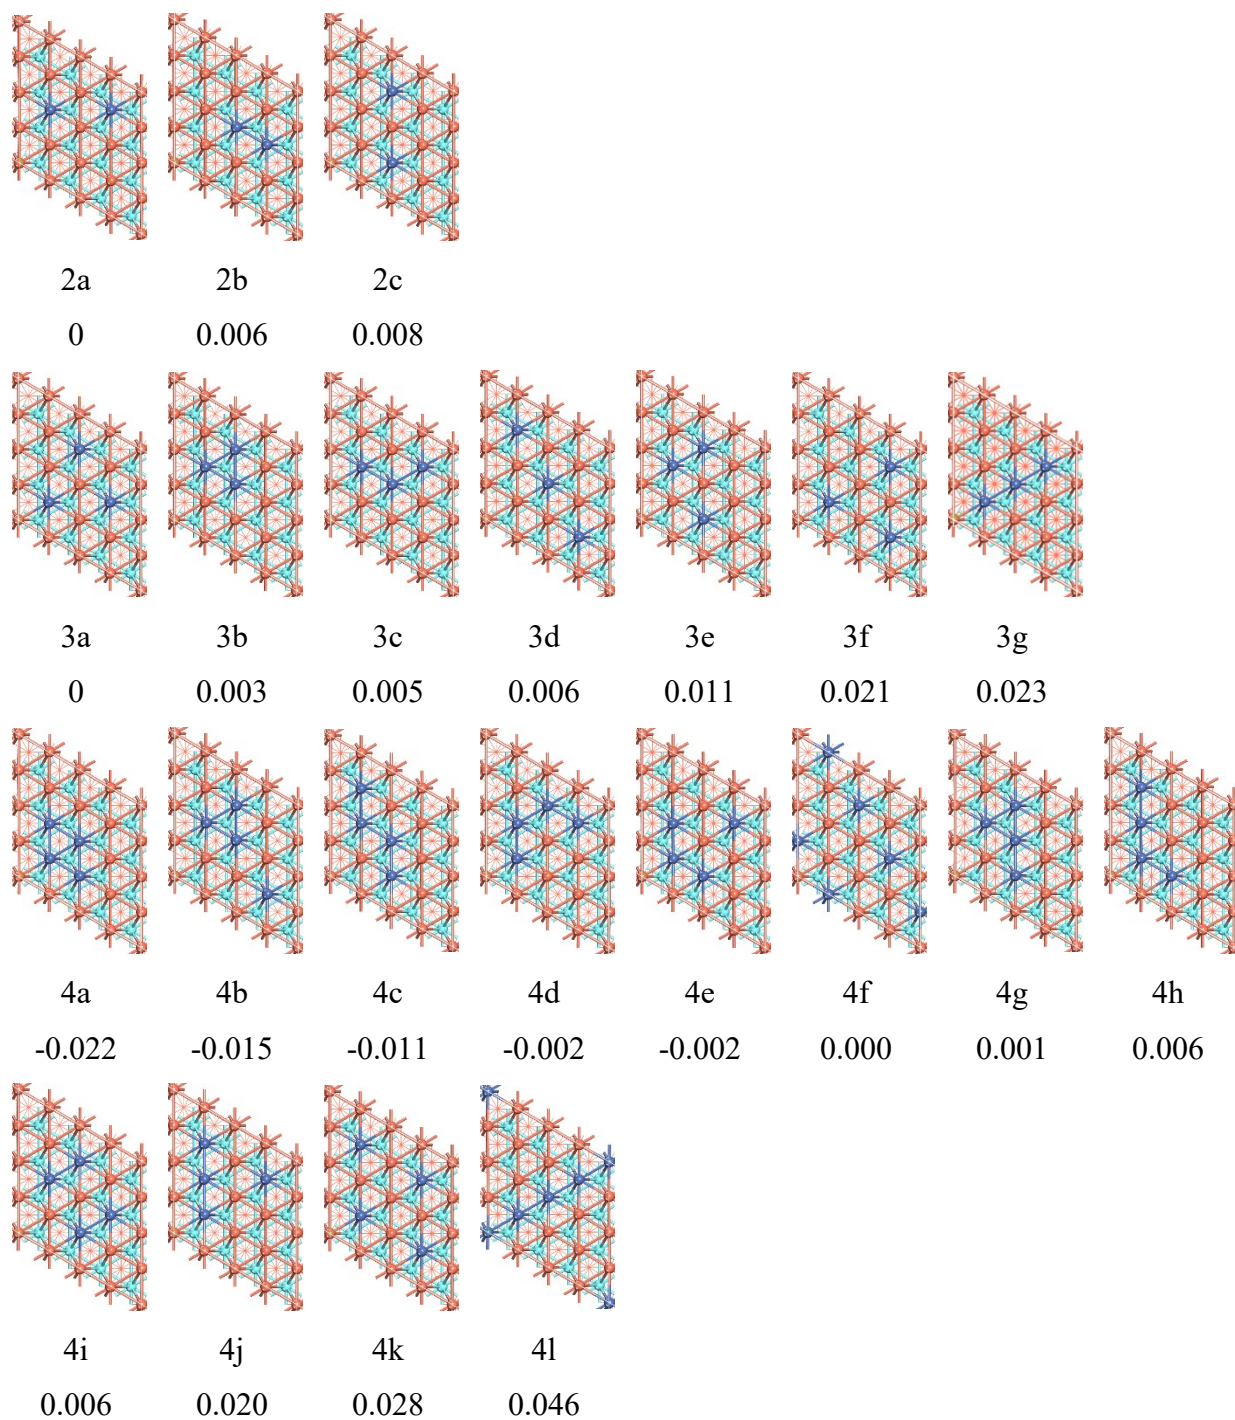

**Figure S4.** Various geometries and relative energies (in eV) of  $n\text{Ni}/\text{Cu}(111)$  ( $n = 2 \sim 4$ ).

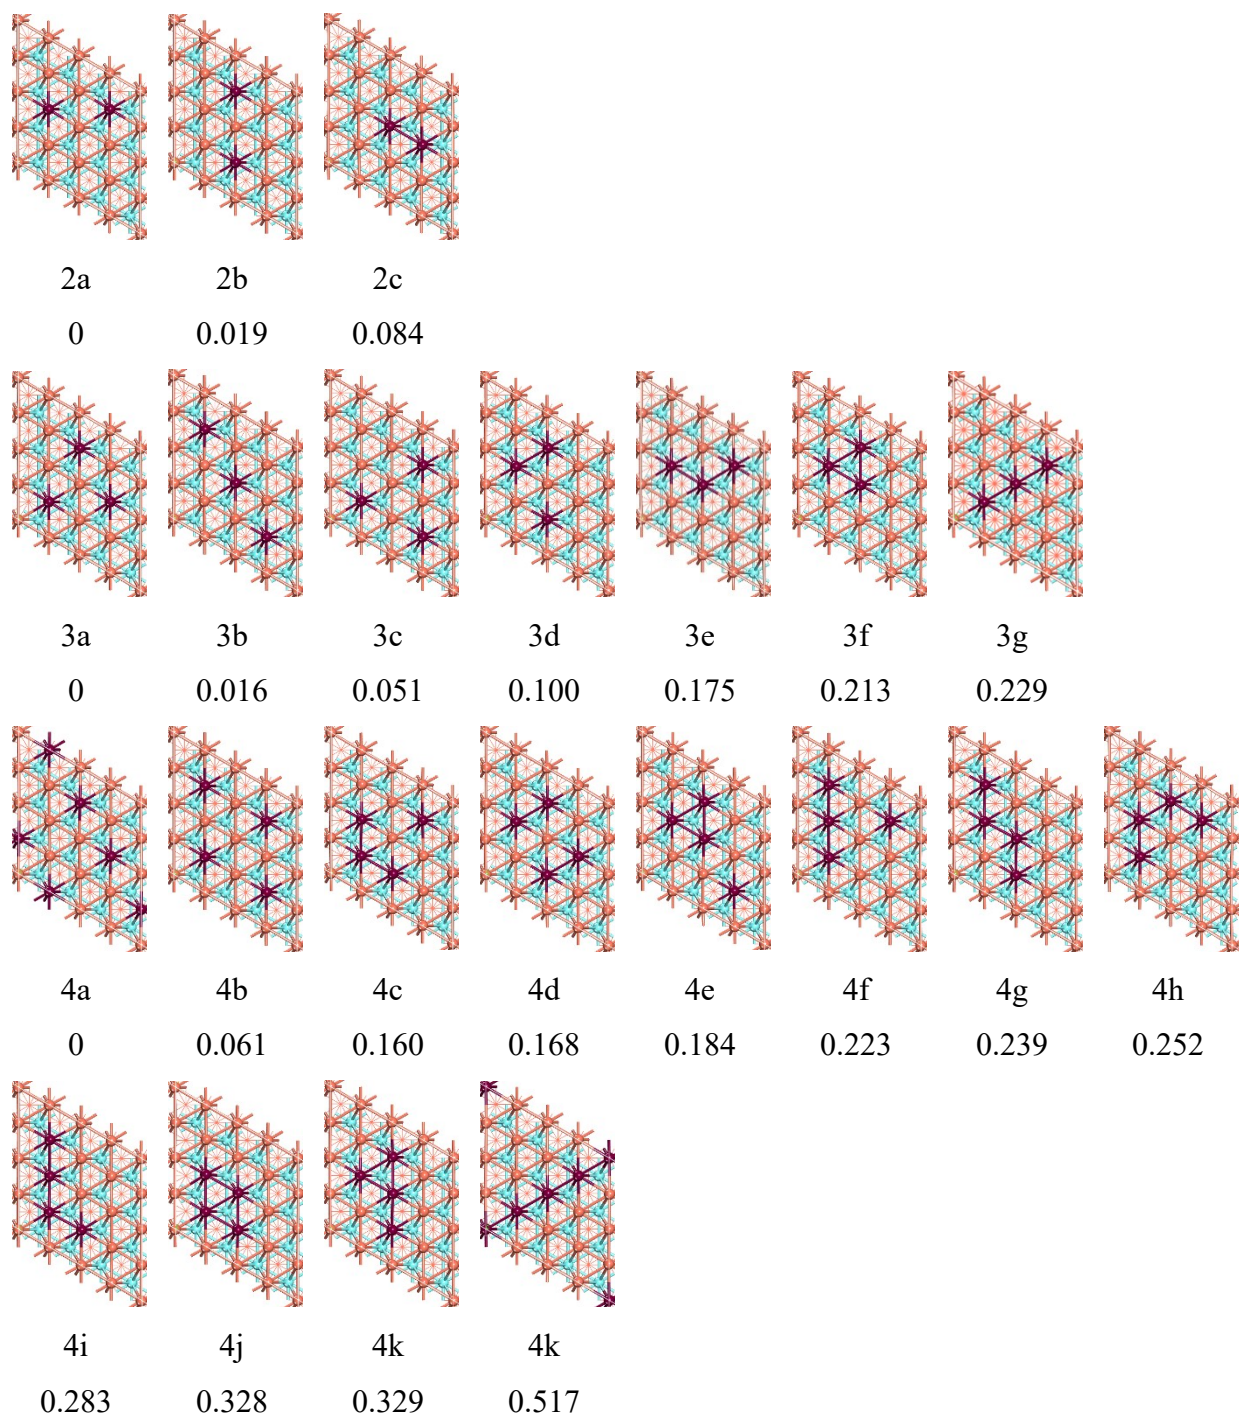

**Figure S5.** Various geometries and relative energies (in eV) of nPd/Cu(111) ( $n = 2 \sim 4$ )

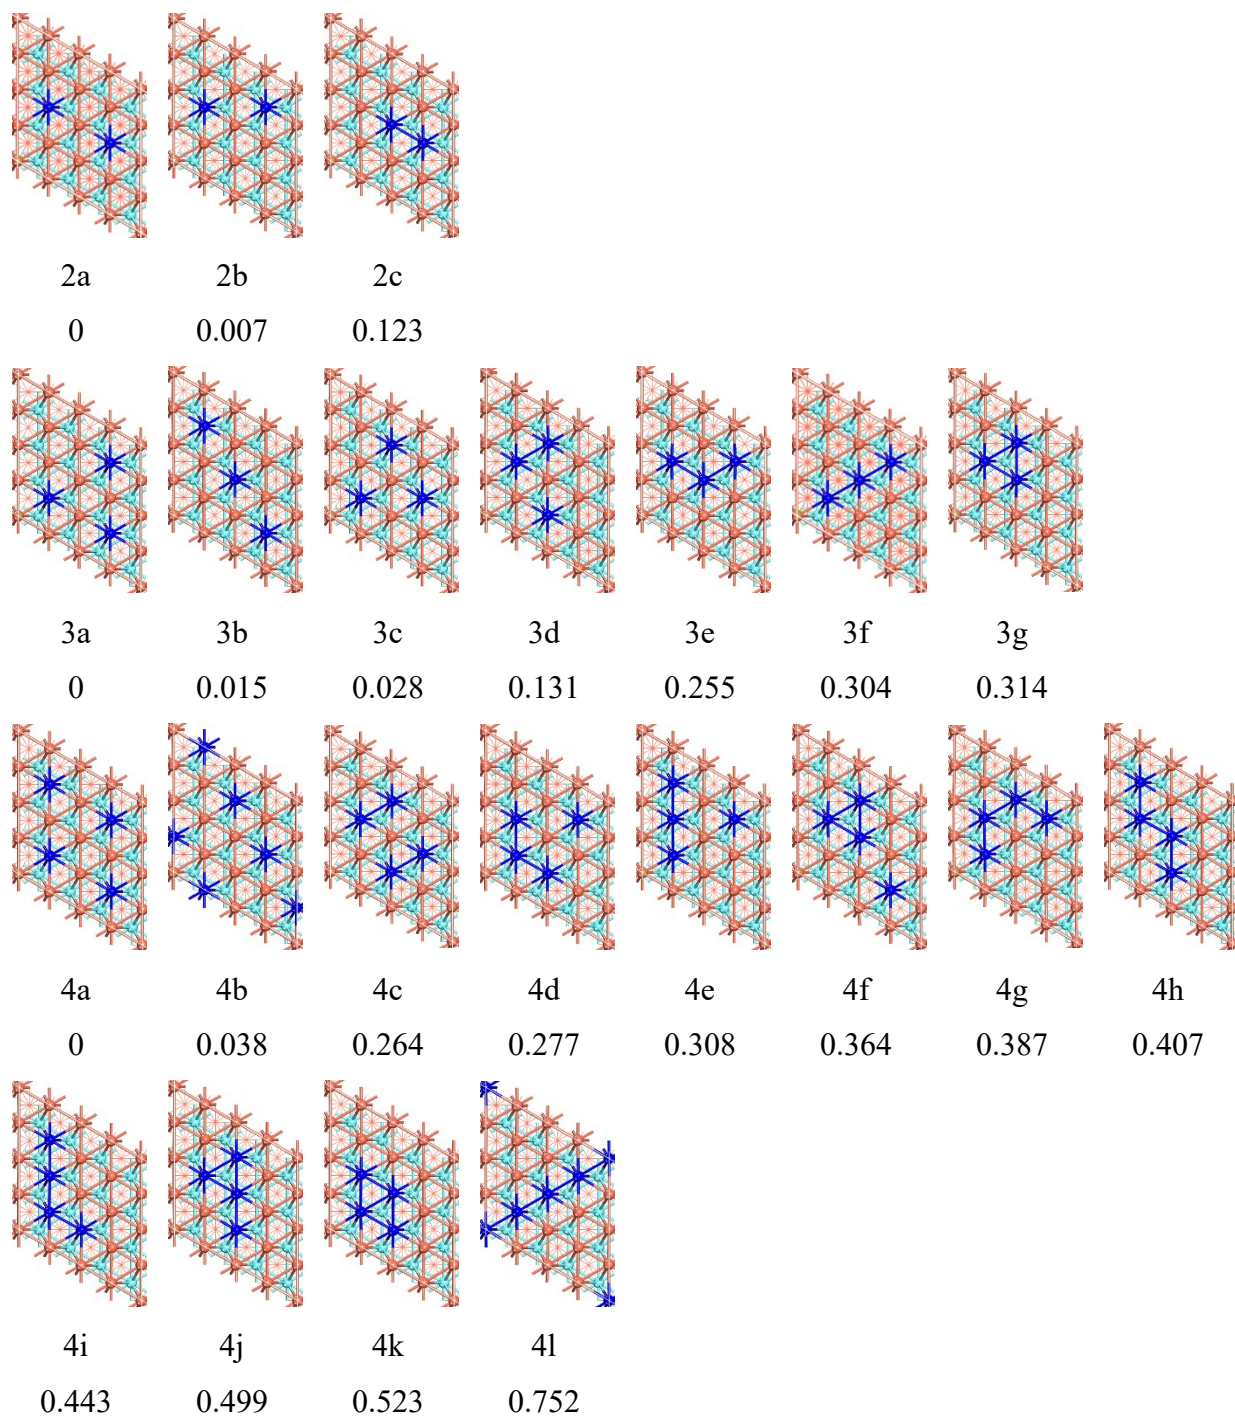

**Figure S6.** Various geometries and relative energies (in eV) of nPt/Cu(111) (n = 2 ~ 4)

#### 4. The geometries of the SAA and PSA explored in this work

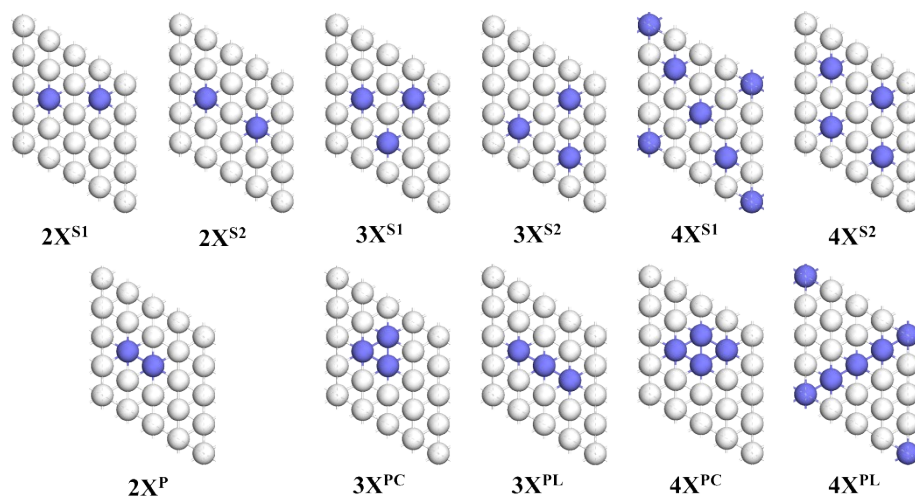

**Scheme S2.** Illustration of the SAA and PSA geometries

**5. geometries employed in discussion on the energy changes in formations of SAA and PSA from M(111) and nX atoms**

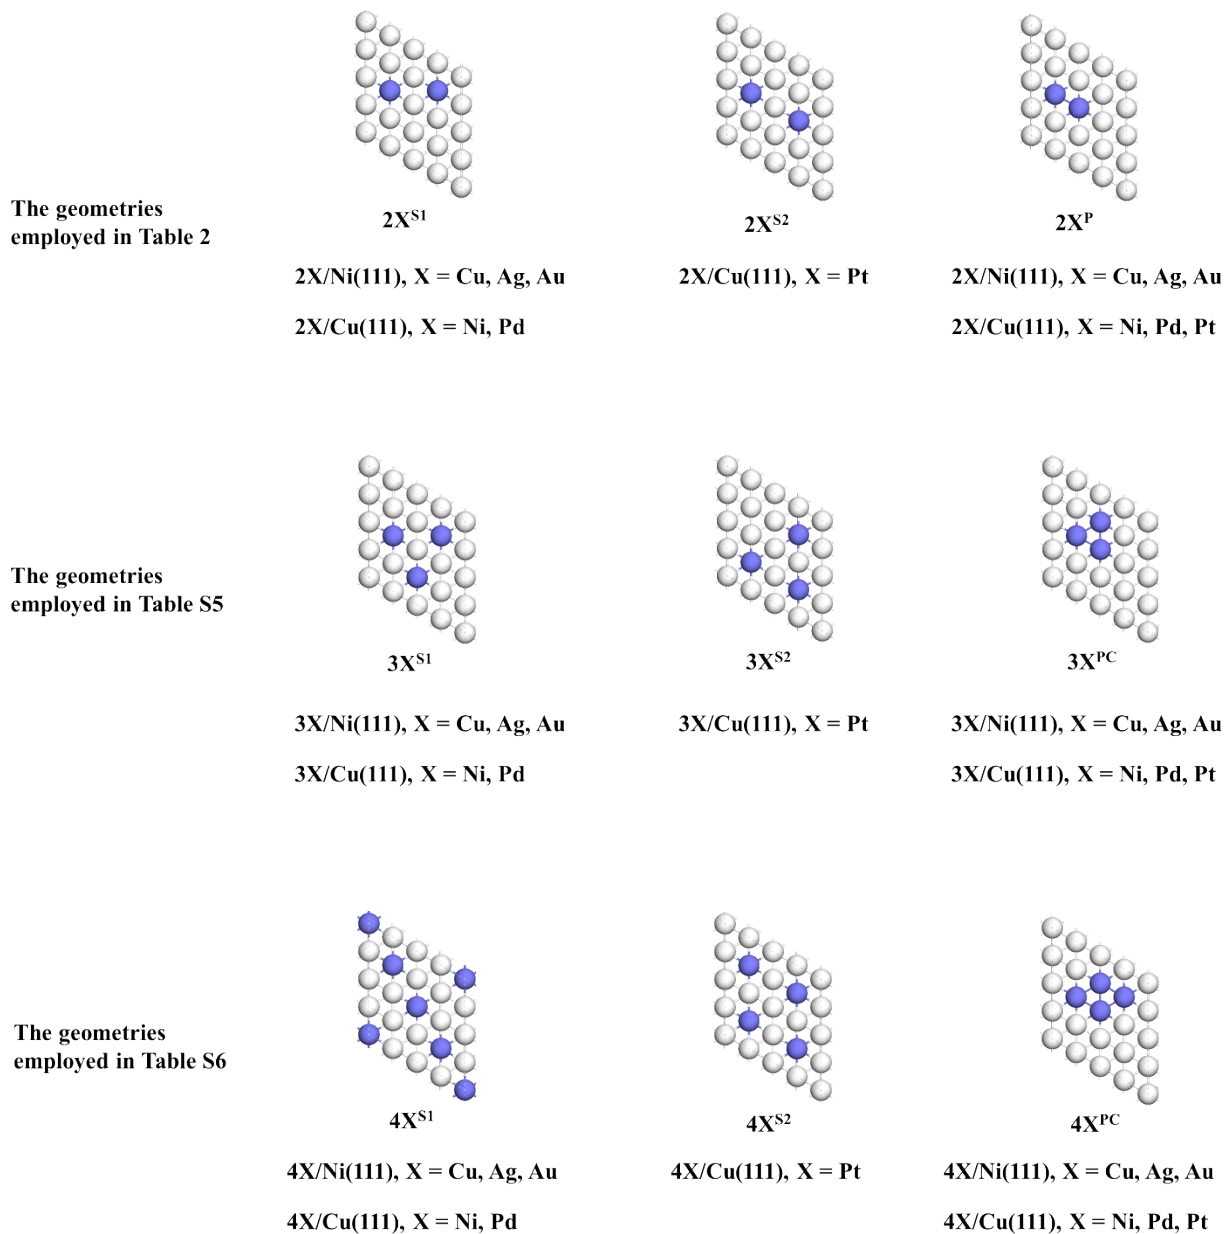

**Scheme S3.** Geometries of nX/M(111) employed in Tables 2, 3, S4, and S5.

## 6. Energy changes in SAA formation and PSA formation from M(111) and nX atoms

**Table S4.** The assumed procedure to form the SAA and PSA structures of  $3X/M(111)^a$  from  $M(111) + 3X$

| M(111)  |    | $[M(111)-3M]_{opt}^S$ | deform | $[M(111)-3M]_{def}^S$ | $+3X$ | $3X/M(111)^S$     | SAA                   |
|---------|----|-----------------------|--------|-----------------------|-------|-------------------|-----------------------|
|         |    |                       |        |                       |       |                   |                       |
|         |    | $E_{rm}^{3S}$ b)      |        | $E_{def}^{3S}$ b)     |       | $E_{int}^{3S}$ b) | $\Delta E_{tot}^{3S}$ |
| Ni(111) | Cu | 17.600 eV             |        | 0.089 eV              |       | -14.034 eV        | 3.655 eV              |
|         | Ag | 17.600                |        | 0.086                 |       | -10.594           | 7.092                 |
|         | Au | 17.600                |        | 0.195                 |       | -13.674           | 4.121                 |
| Cu(111) | Ni | 12.391                |        | 0.078                 |       | -16.237           | -3.768                |
|         | Pd | 12.391                |        | 0.111                 |       | -15.129           | -2.627                |
|         | Pt | 12.185 c)             |        | 0.315                 |       | -20.792           | -8.292                |

  

| M(111)  |    | $[M(111)-M_3]_{opt}^{PC}$ | $3 \circ$             | $[M(111)-M_3]_{def}^{PC}$ | $3X$                | $X_3$             | $+X_3$                | $3X/M(111)^{PC}$ | PSA_C |
|---------|----|---------------------------|-----------------------|---------------------------|---------------------|-------------------|-----------------------|------------------|-------|
|         |    |                           |                       |                           |                     |                   |                       |                  |       |
|         |    | $E_{rm}^{3P}$ d)          | $E_{dis,M_3}^{3P}$ d) | $E_{def}^{3P}$ d)         | $E_{f,X_3}^{3P}$ d) | $E_{int}^{3P}$ d) | $\Delta E_{tot}^{3P}$ |                  |       |
| Ni(111) | Cu | 11.638 eV                 | 4.949 eV              | 0.139 eV                  | -3.399 eV           | -9.732 eV         | 3.594 eV              |                  |       |
|         | Ag | 11.638                    | 4.949                 | 0.180                     | -2.532              | -7.151            | 7.083                 |                  |       |
|         | Au | 11.638                    | 4.949                 | 0.248                     | -3.466              | -9.088            | 4.280                 |                  |       |
| Cu(111) | Ni | 8.199                     | 3.361                 | 0.141                     | -4.885              | -10.581           | -3.765                |                  |       |
|         | Pd | 8.199                     | 3.361                 | 0.115                     | -3.360              | -10.729           | -2.414                |                  |       |
|         | Pt | 8.199                     | 3.361                 | 0.211                     | -6.617              | -13.132           | -7.978                |                  |       |

a) The SAA\_S2 structure of  $3Pt/Cu(111)^S$  and the SAA\_S1 structure of the other  $3X/M(111)^S$  are used in the SAA part and the PSA\_C is used in all  $3X/M(111)^P$  cases here. b)  $E_{rm}^{3S}$ ,  $E_{def}^{3S}$ , and  $E_{int}^{3S}$  are defined by eqs (1), (2), and (3). c) This value differs from  $E_{rm}^{3S}$  of  $3Ni/Cu(111)$  and  $3Pd/Cu(111)$  because  $3Pt/Cu(111)$  has the S2 structure in which two Pt atoms are separated by one Cu atom but  $3Ni/Cu(111)$  and  $3Pd/Cu(111)$  have the S1 structure in which two X atoms ( $X = Ni$  or  $Pd$ ) are separated by one Cu-Cu bond and other two X atoms are separated by one Cu atom, as shown in Table 1, Scheme 1, and Scheme S3 of the SI. d)  $E_{rm}^{3P}$ ,  $E_{dis,M_3}^{3P}$ ,  $E_{f,X_3}^{3P}$ , and  $E_{int}^{3P}$  are defined by eqs (5), (6), (7), (8) and (9). All these terms are given in eV unit.



In Table S4, the  $\Delta E_{\text{tot}}$  becomes more positive in the order  $\text{PSA\_C} < \text{SAA}$  in  $3\text{Cu}/\text{Ni}(111)$  and  $3\text{Ag}/\text{Ni}(111)$ , and in the order  $\text{SAA} < \text{PSA\_C}$  in  $3\text{Au}/\text{Ni}(111)$ ,  $3\text{Ni}/\text{Cu}(111)$ ,  $3\text{Pd}/\text{Cu}(111)$ , and  $3\text{Pt}/\text{Cu}(111)$ . These results are in agreement with the relative stabilities, as shown in Table 1.

When going from  $3\text{Cu}/\text{Ni}(111)$  to  $3\text{Au}/\text{Ni}(111)$ , the  $E_{\text{def}}^{3\text{S}}$  term gets more positive by 0.106 eV in the SAA, while the  $E_{\text{def}}^{3\text{P}}$  term increases by 0.109 eV in the PSA\_C; The  $E_{\text{int}}^{3\text{S}}$  gets less negative by 0.360 eV, while the  $E_{\text{f},\text{X}3}^{3\text{P}} + E_{\text{int}}^{3\text{P}}$  gets less negative by 0.577 eV. The change in the difference between the  $E_{\text{def}}^{3\text{S}}$  and  $E_{\text{def}}^{3\text{P}}$  is -0.003 eV, which is much smaller than that of -0.217 eV between the  $E_{\text{int}}^{3\text{S}}$  and the  $E_{\text{f},\text{X}3}^{3\text{P}} + E_{\text{int}}^{3\text{P}}$ . These results indicate that the important factor in determining the formation of  $3\text{Cu}/\text{Ni}(111)^{\text{P}}$  and  $3\text{Au}/\text{Ni}(111)^{\text{S}}$  is the much less decrease in the  $E_{\text{int}}^{3\text{S}}$  than in the  $E_{\text{f},\text{X}3}^{3\text{P}} + E_{\text{int}}^{3\text{P}}$  when going from  $X = \text{Cu}$  to  $X = \text{Au}$ .

When going from  $3\text{Cu}/\text{Ni}(111)$  to  $3\text{Ag}/\text{Ni}(111)$ , the  $E_{\text{def}}^{3\text{S}}$  term gets less positive by 0.003 eV in the SAA, while the  $E_{\text{def}}^{3\text{P}}$  term gets more positive by 0.041 eV in the PSA\_C. The  $E_{\text{int}}^{3\text{S}}$  gets less negative by 3.440 eV in the SAA, while the  $E_{\text{f},\text{X}3}^{3\text{P}} + E_{\text{int}}^{3\text{P}}$  increases gets less negative by 3.348 eV in the PSA\_C. These results show that the important factor in determining the formation of  $3\text{Cu}/\text{Ni}(111)^{\text{P}}$  and  $3\text{Ag}/\text{Ni}(111)^{\text{P}}$  is the much more decrease in the  $E_{\text{int}}^{3\text{S}}$  than in the  $E_{\text{f},\text{X}n}^{\text{nP}} + E_{\text{int}}^{\text{nP}}$  when going from  $X = \text{Cu}$  to  $X = \text{Ag}$ .

In  $3\text{X}/\text{Cu}(111)$ , when going from  $X = \text{Ni}$  to  $X = \text{Pd}$ , the  $E_{\text{def}}^{3\text{S}}$  gets more positive by 0.033 eV in the SAA, while the  $E_{\text{def}}^{3\text{P}}$  gets less positive by 0.026 eV in the PSA\_C. The  $E_{\text{int}}^{3\text{S}}$  gets less negative by 1.108 eV in the SAA. The  $E_{\text{int}}^{3\text{P}} + E_{\text{f},\text{X}3}^{3\text{P}}$  gets less negative by 1.377 eV in the PSA\_C, whose decrease is larger than that of the  $E_{\text{int}}^{3\text{S}}$  term by 0.269 eV. Because of the larger decrease in the  $E_{\text{int}}^{3\text{P}} + E_{\text{f},\text{X}3}^{3\text{P}}$  than in the  $E_{\text{int}}^{3\text{S}}$ , the SAA becomes more stable than the PSA in  $3\text{Pd}/\text{Cu}(111)$ .

When going from  $X = \text{Ni}$  to  $X = \text{Pt}$ , the  $E_{\text{rm}}^{3\text{S}}$  gets more positive by 0.026 eV in the SAA, while the  $E_{\text{rm}}^{3\text{P}}$  term does not change in the PSA\_C. The  $E_{\text{def}}^{3\text{S}}$  gets more positive by 0.237 eV in the

SAA. The  $E_{\text{def}}^{3\text{P}}$  gets more positive by 0.070 eV in the PSA\_C, whose increase is smaller than the  $E_{\text{int}}^{3\text{S}}$  gets more negative by 0.167 eV. The  $E_{\text{int}}^{3\text{S}}$  gets more negative by 4.555 eV in the SAA. The  $E_{\text{int}}^{3\text{P}} + E_{\text{f},\text{X}^3}^{3\text{P}}$  gets more negative by 4.283 eV in the PSA\_C, whose increase is much smaller than that of the  $E_{\text{int}}^{3\text{S}}$  term by 0.272 eV. Apparently, the change in the stabilization energy is larger than that in the destabilization energy. Because of the larger decrease in the  $E_{\text{int}}^{3\text{P}} + E_{\text{f},\text{X}^3}^{3\text{P}}$  than in the  $E_{\text{int}}^{3\text{S}}$ , the SAA becomes more stable than the PSA in 3Pt/Cu(111).

**Table S5.** The assumed procedure to form the SAA and PSA structures of 4X/M(111)<sup>a</sup> from M(111) + 4X

| M(111)  |    | $[M(111)-4M]_{opt}^S$       | deform | $[M(111)-4M]_{def}^S$        | +4X | 4X/M(111) <sup>S</sup>       | SAA                   |
|---------|----|-----------------------------|--------|------------------------------|-----|------------------------------|-----------------------|
|         |    |                             |        |                              |     |                              |                       |
|         |    | $E_{rm}^{4S}$ <sup>b)</sup> |        | $E_{def}^{4S}$ <sup>b)</sup> |     | $E_{int}^{4S}$ <sup>b)</sup> | $\Delta E_{tot}^{4S}$ |
| Ni(111) | Cu | 23.454 eV                   |        | 0.305 eV                     |     | -18.847 eV                   | 4.912 eV              |
|         | Ag | 23.454                      |        | 0.264                        |     | -14.093                      | 9.652                 |
|         | Au | 23.454                      |        | 0.434                        |     | -18.202                      | 5.686                 |
| Cu(111) | Ni | 16.606                      |        | 0.108                        |     | -21.534                      | -4.820                |
|         | Pd | 16.606                      |        | 0.179                        |     | -20.039                      | -3.254                |
|         | Pt | 16.268 <sup>c)</sup>        |        | 0.380                        |     | -27.502                      | -10.854               |

  

| M(111)  |    | $[M(111)-M_4]_{opt}^{PC}$   | $M_4$                            | $4M$ | $[M(111)-M_4]_{def}^{PC}$    | $4X$                           | $X_4 + X_4$ | 4X/M(111) <sup>PC</sup>      | PSA_C                 |
|---------|----|-----------------------------|----------------------------------|------|------------------------------|--------------------------------|-------------|------------------------------|-----------------------|
|         |    |                             |                                  |      |                              |                                |             |                              |                       |
|         |    | $E_{rm}^{4P}$ <sup>d)</sup> | $E_{dis,M_4}^{4P}$ <sup>d)</sup> |      | $E_{def}^{4P}$ <sup>d)</sup> | $E_{f,X_4}^{4P}$ <sup>d)</sup> |             | $E_{int}^{4P}$ <sup>d)</sup> | $\Delta E_{tot}^{4P}$ |
| Ni(111) | Cu | 13.986 eV                   | 7.845 eV                         |      | 0.162 eV                     | -5.942 eV                      |             | -11.248 eV                   | 4.804 eV              |
|         | Ag | 13.986                      | 7.845                            |      | 0.215                        | -4.428                         |             | -8.125                       | 9.494                 |
|         | Au | 13.986                      | 7.845                            |      | 0.287                        | -6.036                         |             | -10.167                      | 5.916                 |
| Cu(111) | Ni | 9.469                       | 5.886                            |      | 0.167                        | -7.809                         |             | -12.554                      | -4.841                |
|         | Pd | 9.469                       | 5.886                            |      | 0.142                        | -5.637                         |             | -12.787                      | -2.927                |
|         | Pt | 9.469                       | 5.886                            |      | 0.256                        | -10.101                        |             | -15.841                      | -10.331               |

a) The most stable structure presented in Table 1 is employed here. b)  $E_{rm}^{4S}$ ,  $E_{def}^{4S}$ , and  $E_{int}^{4S}$  are defined by eqs. (1), (2), and (3). c) This value differs from  $E_{rm}^{4S}$  of 4Ni/Cu(111) and 4Pd/Cu(111) because 4Pt/Cu(111) has the S2 structure in which two Pt atoms are separated by one Cu atom but 4Ni/Cu(111) and 4Pd/Cu(111) have the S1 structure in which two X atoms (X = Ni or Pd) are separated by one Cu-Cu bond and other two X atoms are separated by one Cu atom, as shown in Table 1, Scheme 1, and Scheme S3 of the SI. d)  $E_{rm}^{4P}$ ,  $E_{dis,M_4}^{4P}$ ,  $E_{f,X_4}^{4P}$ , and  $E_{int}^{4P}$  are defined by eqs. (5), (6), (7), (8) and (9). All these terms are in eV unit.

In Table S5, the  $\Delta E_{tot}$  becomes more positive in the order PSA\_C < SAA in 4Cu/Ni(111), 4Ag/Ni(111), and 4Ni/Cu(111), and in the order SAA < PSA\_C in 4Au/Ni(111), 4Pd/Cu(111), and 4Pt/Cu(111). These trends agree with the relative stabilities, shown in Table 1.

When going from 4Cu/Ni(111) to 4Au/Ni(111), the  $E_{\text{def}}^{4S}$  term gets more positive by 0.129 eV in the SAA, while the  $E_{\text{def}}^{4P}$  term gets more positive by 0.125 eV in the PSA\_C; The  $E_{\text{int}}^{4S}$  gets less negative by 0.645 eV in the SAA, while the  $E_{f,X4}^{4P} + E_{\text{int}}^{4P}$  gets less negative by 0.987 eV in the PSA\_C. These results show that the important factor to afford 4Cu/Ni(111)<sup>P</sup> and 4Au/Ni(111)<sup>S</sup> is the much less decrease in the  $E_{\text{int}}^{4S}$  than in the  $E_{f,X4}^{4P} + E_{\text{int}}^{4P}$  when going from 4Cu/Ni(111) to 4Au/Ni(111).

When going from 4Cu/Ni(111) to 4Ag/Ni(111), the  $E_{\text{def}}^{4S}$  term gets less positive by 0.041 eV in the SAA, while the  $E_{\text{def}}^{4P}$  term gets more positive by 0.053 eV in the PSA\_C; The  $E_{\text{int}}^{4S}$  gets less negative by 4.754 eV in the SAA, while the  $E_{f,X4}^{4P} + E_{\text{int}}^{4P}$  gets less negative by 4.637 eV in the PSA\_C. These results show that the important factor to help the formation of 4Cu/Ni(111)<sup>P</sup> and 4Ag/Ni(111)<sup>P</sup> is the much more decrease in the  $E_{\text{int}}^{4S}$  than in the  $E_{f,X4}^{4P} + E_{\text{int}}^{4P}$  when going from 4Cu/Ni(111) to 4Ag/Ni(111).

When going from 4Ni/Cu(111) to 4Pd/Cu(111), the  $E_{\text{def}}^{4S}$  term gets more positive by 0.071 eV in the SAA, and the  $E_{\text{def}}^{4P}$  term gets less positive by 0.025 eV in the PSA\_C. The  $E_{\text{int}}^{4S}$  gets less negative by 1.495 eV in the SAA, while the  $E_{f,X4}^{4P} + E_{\text{int}}^{4P}$  gets less negative by 1.939 eV in the PSA\_C. These results indicate that the important factor to afford 4Ni/Cu(111)<sup>P</sup> and 4Pd/Cu(111)<sup>S</sup> is the much less decrease in the  $E_{\text{int}}^{4S}$  than in the  $E_{f,X4}^{4P} + E_{\text{int}}^{4P}$  when going from 4Ni/Cu(111) to 4Pd/Cu(111).

When going from 4Ni/Cu(111) to 4Pt/Cu(111), the  $E_{\text{rm}}^{4S}$  gets less positive by 0.338 eV in the SAA and the  $E_{\text{rm}}^{4P} + E_{\text{dis},M4}^{4P}$  is the same in the PSA\_C. The  $E_{\text{def}}^{4S}$  term gets more positive by 0.272 eV in the SAA, while the  $E_{\text{def}}^{4P}$  term gets less positive by 0.089 eV in the PSA\_C; The  $E_{\text{int}}^{4S}$  gets more negative by 5.968 eV in the SAA, while the  $E_{f,X4}^{4P} + E_{\text{int}}^{4P}$  gets more negative by 5.579

eV in the PSA\_C. These results indicate that the important factor to afford 4Pt/Cu(111)<sup>S</sup> is the larger increase in the  $E_{\text{int}}^{4\text{S}}$  than in the  $E_{\text{f,X4}}^{4\text{P}} + E_{\text{int}}^{4\text{P}}$  when going from 4Ni/Cu(111) to 4Pt/Cu(111).

All the above results show that the  $E_{\text{int}}$  plays an important role in determining the relative stabilities of the SAA and PSA.

**7. The Bader charge of nX atoms and X<sub>n</sub> cluster, the Fermi level, d band center of nX/M(111)**

**Table S6.** The Bader charge of each X atom in nX/M(111)

| Alloys           | nX/Ni(111) |        |        | nX/Cu(111) |        |        |
|------------------|------------|--------|--------|------------|--------|--------|
|                  | X = Cu     | X = Ag | X = Au | X = Ni     | X = Pd | X = Pt |
| 2X <sup>S</sup>  | 0.02       | -0.10  | -0.45  | -0.10      | -0.37  | -0.64  |
|                  | 0.02       | -0.10  | -0.45  | -0.10      | -0.37  | -0.64  |
| 2X <sup>P</sup>  | 0.00       | -0.09  | -0.39  | -0.09      | -0.33  | -0.57  |
|                  | 0.01       | -0.09  | -0.38  | -0.10      | -0.33  | -0.57  |
| 3X <sup>S</sup>  | 0.01       | -0.09  | -0.43  | -0.10      | -0.36  | -0.65  |
|                  | 0.01       | -0.08  | -0.43  | -0.10      | -0.36  | -0.64  |
|                  | 0.01       | -0.09  | -0.43  | -0.09      | -0.36  | -0.64  |
| 3X <sup>PC</sup> | 0.02       | -0.01  | -0.30  | -0.08      | -0.32  | -0.52  |
|                  | -0.01      | -0.10  | -0.34  | -0.08      | -0.31  | -0.50  |
|                  | 0.00       | -0.07  | -0.34  | -0.01      | -0.29  | -0.47  |
| 4X <sup>S</sup>  | 0.02       | -0.08  | -0.42  | -0.10      | -0.36  | -0.64  |
|                  | 0.02       | -0.08  | -0.42  | -0.10      | -0.36  | -0.64  |
|                  | 0.02       | -0.08  | -0.42  | -0.10      | -0.36  | -0.64  |
|                  | 0.02       | -0.08  | -0.43  | -0.10      | -0.36  | -0.64  |
| 4X <sup>PC</sup> | 0.01       | -0.08  | -0.27  | -0.09      | -0.26  | -0.45  |
|                  | 0.02       | -0.08  | -0.33  | -0.09      | -0.31  | -0.48  |
|                  | 0.00       | -0.08  | -0.33  | -0.09      | -0.29  | -0.50  |
|                  | -0.01      | -0.06  | -0.27  | -0.06      | -0.29  | -0.46  |

**Table S7.** The Bader charge of nX ( $Q$  in  $e$ ) and the Fermi level ( $\epsilon_F$  in eV) in nX/M(111)

| Alloys      |              | X     | 2X <sup>S</sup> | 2X <sup>P</sup> | 3X <sup>S</sup> | 3X <sup>PC</sup> | 4X <sup>S</sup> | 4X <sup>PC</sup> |
|-------------|--------------|-------|-----------------|-----------------|-----------------|------------------|-----------------|------------------|
| nCu/Ni(111) | $Q$          | 0.01  | 0.04            | 0.01            | 0.04            | 0.01             | 0.08            | 0.02             |
|             | $\epsilon_F$ | -5.06 | -5.06           | -5.06           | -5.06           | -5.06            | -5.05           | -5.05            |
| nAg/Ni(111) | $Q$          | -0.10 | -0.20           | -0.18           | -0.26           | -0.18            | -0.32           | -0.29            |
|             | $\epsilon_F$ | -5.06 | -5.06           | -5.06           | -5.05           | -5.04            | -5.04           | -5.04            |
| nAu/Ni(111) | $Q$          | -0.46 | -0.90           | -0.77           | -1.29           | -0.98            | -1.68           | -1.19            |
|             | $\epsilon_F$ | -5.09 | -5.13           | -5.13           | -5.17           | -5.15            | -5.20           | -5.17            |
| nNi/Cu(111) | $Q$          | -0.09 | -0.19           | -0.18           | -0.29           | -0.17            | -0.42           | -0.33            |
|             | $\epsilon_F$ | -4.77 | -4.77           | -4.77           | -4.77           | -4.78            | -4.79           | -4.81            |
| nPd/Cu(111) | $Q$          | -0.39 | -0.73           | -0.66           | -1.08           | -0.92            | -1.45           | -1.16            |
|             | $\epsilon_F$ | -4.77 | -4.78           | -4.78           | -4.78           | -4.79            | -4.81           | -4.82            |
| nPt/Cu(111) | $Q$          | -0.65 | -1.29           | -1.14           | -1.92           | -1.50            | -2.62           | -1.89            |
|             | $\epsilon_F$ | -4.80 | -4.84           | -4.84           | -4.88           | -4.89            | -4.94           | -4.96            |

**Table S8.** The  $d$  band center ( $\epsilon_{dc-tot}$ ) and  $d$  band center in the valence level ( $\epsilon_{dc-VB}$ ) of the first-layer atoms on nAg/Ni(111) and nPd/Cu(111) alloys.

| nX <sup>1</sup> /Ni(111) | $\epsilon_{dc-tot}$      | $\epsilon_{dc-VB}$ | nX <sup>2</sup> /Cu(111) | $\epsilon_{dc-tot}$      | $\epsilon_{dc-VB}$ |
|--------------------------|--------------------------|--------------------|--------------------------|--------------------------|--------------------|
| nX <sup>1</sup>          | nCu/Ni(111) <sup>S</sup> |                    | nX <sup>2</sup>          | nNi/Cu(111) <sup>S</sup> |                    |
| 2Cu <sup>S1</sup>        | -4.83                    | -6.84              | 2Ni <sup>S1</sup>        | -5.85                    | -7.13              |
| 3Cu <sup>S1</sup>        | -4.89                    | -6.87              | 3Ni <sup>S1</sup>        | -5.67                    | -7.00              |
| 4Cu <sup>S1</sup>        | -4.96                    | -6.88              | 4Ni <sup>S1</sup>        | -5.55                    | -6.89              |
|                          | nAg/Ni(111) <sup>S</sup> |                    |                          | nPd/Cu(111) <sup>P</sup> |                    |
| 2Ag <sup>S1</sup>        | -4.99                    | -7.08              | 2Pd <sup>P</sup>         | -5.94                    | -7.29              |
| 3Ag <sup>S1</sup>        | -5.13                    | -7.22              | 3Pd <sup>PC</sup>        | -5.83                    | -7.24              |
| 4Ag <sup>S1</sup>        | -5.24                    | -7.31              | 4Pd <sup>PC</sup>        | -5.74                    | -7.21              |
|                          | nAu/Ni(111) <sup>P</sup> |                    |                          | nPt/Cu(111) <sup>P</sup> |                    |
| 2Au <sup>P</sup>         | -5.05                    | -7.14              | 2Pt <sup>P</sup>         | -6.03                    | -7.38              |
| 3Au <sup>PC</sup>        | -5.21                    | -7.32              | 3Pt <sup>PC</sup>        | -5.98                    | -7.39              |
| 4Au <sup>PC</sup>        | -5.37                    | -7.49              | 4Pt <sup>PC</sup>        | -5.94                    | -7.43              |



## 8. PDOSs of M(111) and nX/M(111)

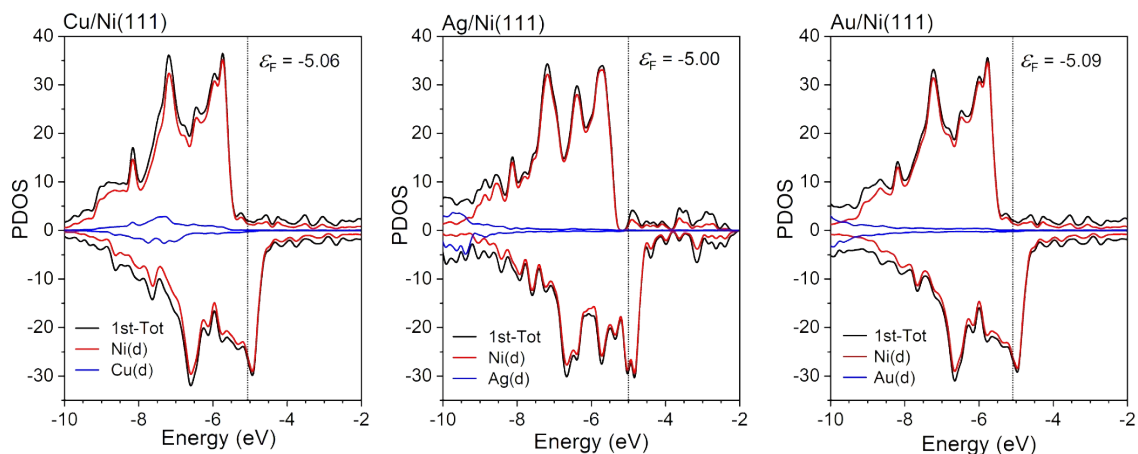

**Figure S7.** The PDOS of the top-layer in X/Ni(111) (X = Cu, Ag, Au)

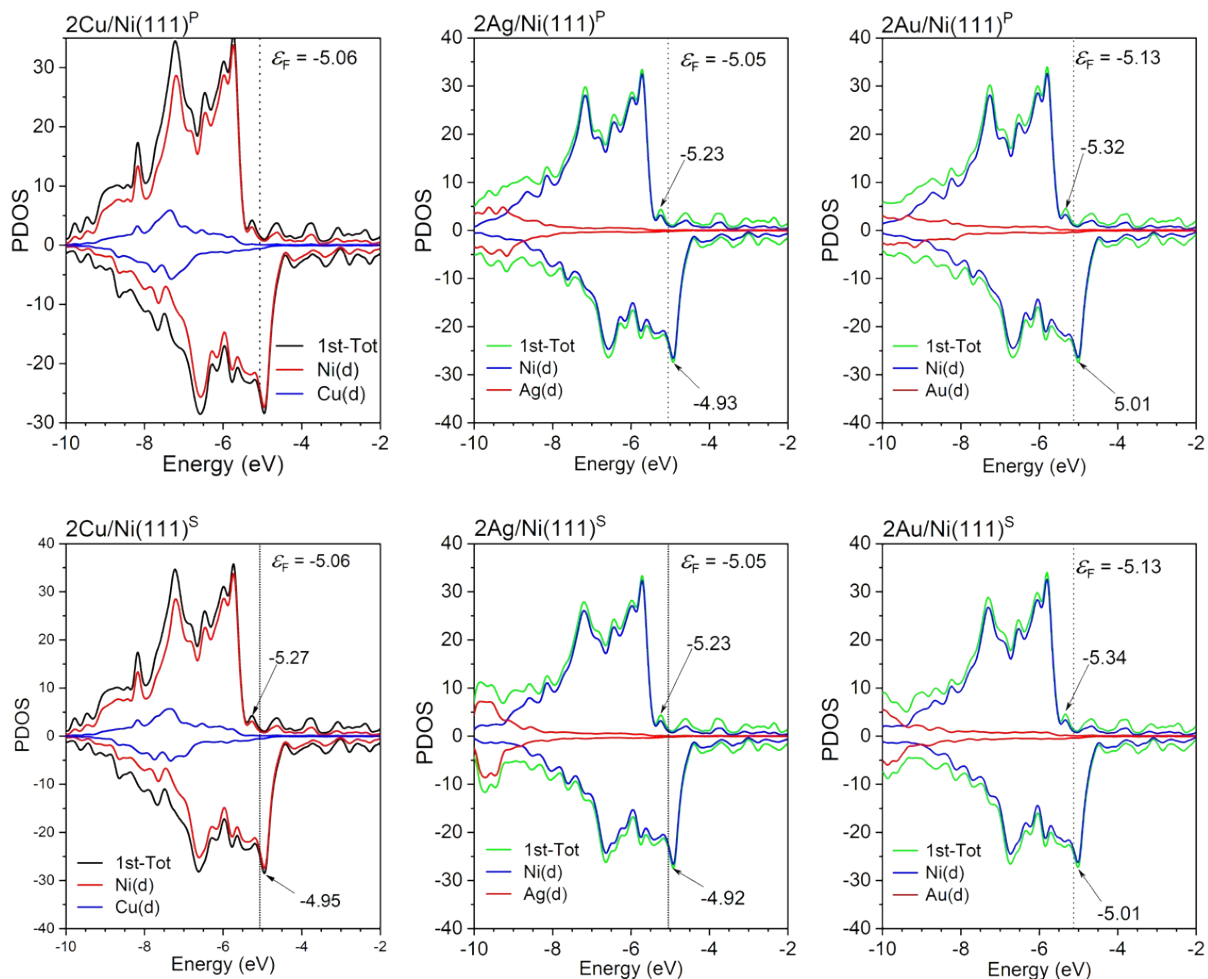

**Figure S8.** The PDOS of the top-layer in 2X/Ni(111) (X = Cu, Ag, Au)

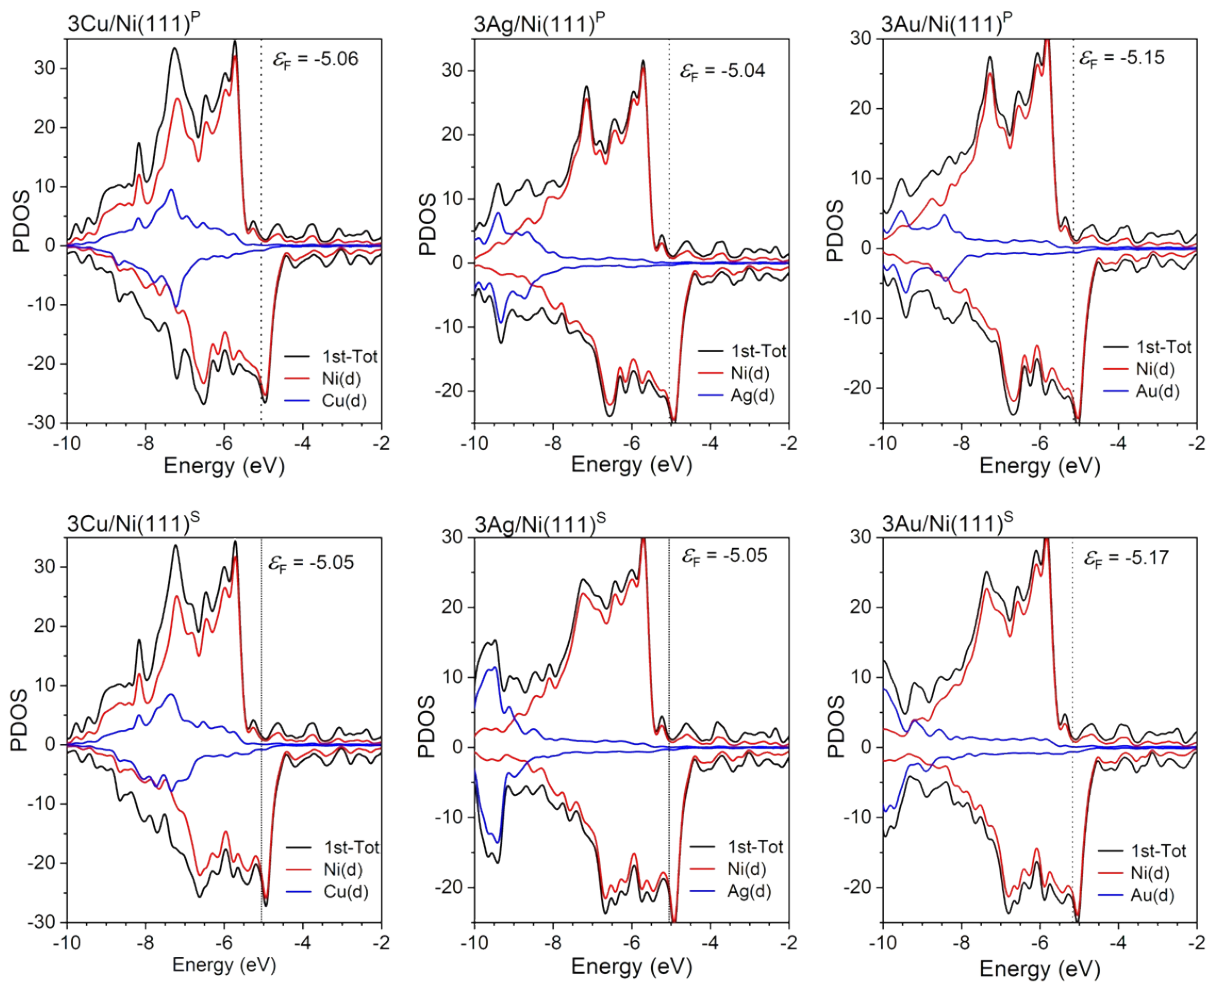

**Figure S9.** The PDOS of the top-layer in  $3X/\text{Ni}(111)$  ( $X = \text{Cu}, \text{Ag}, \text{Au}$ )

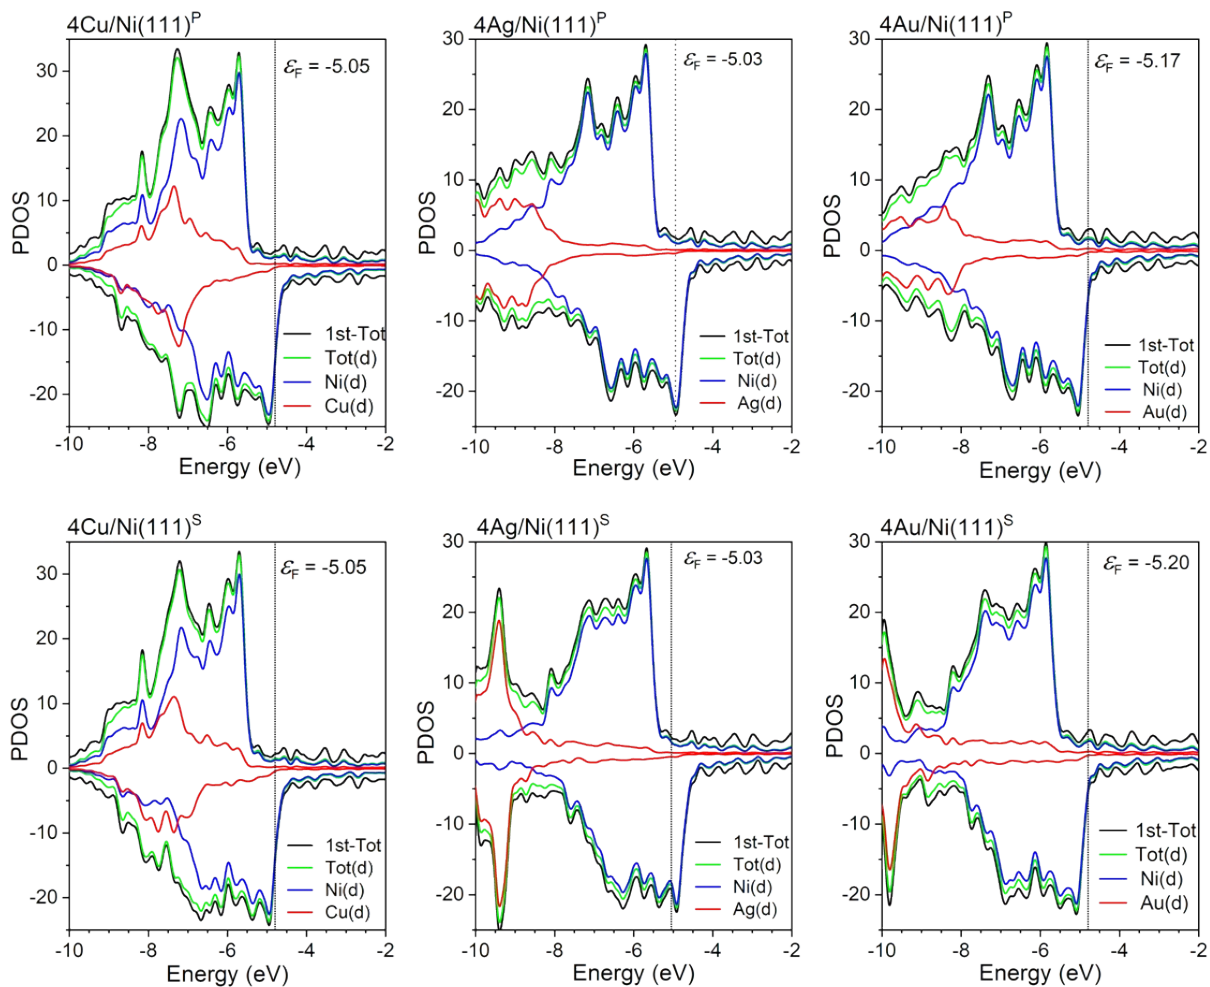

**Figure S10.** The PDOS of the top-layer in  $4X/\text{Ni}(111)$  ( $X = \text{Cu}, \text{Ag}, \text{Au}$ )

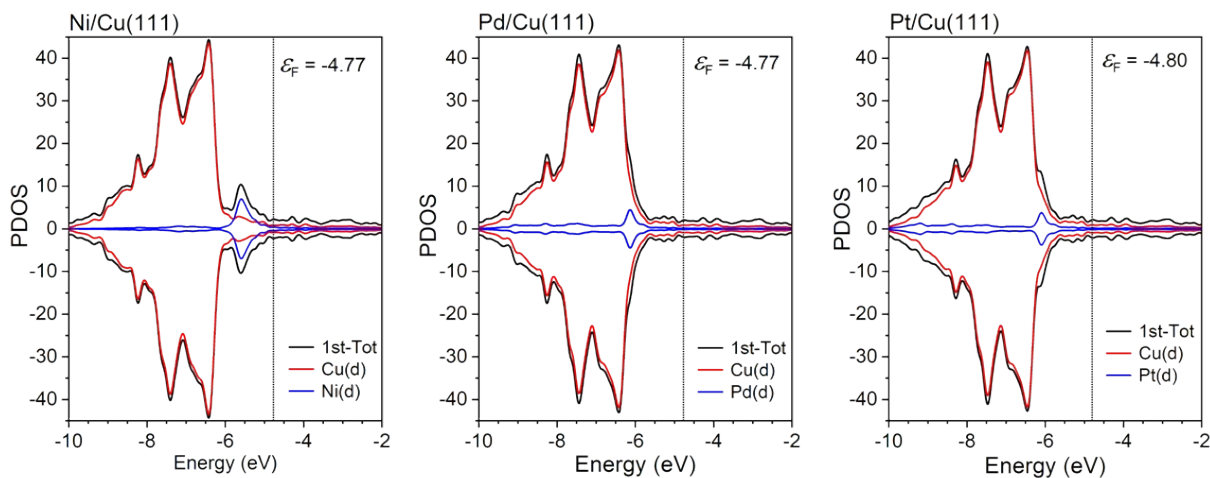

**Figure S11.** The PDOS of the top-layer in  $X/\text{Cu}(111)$  ( $X = \text{Ni}, \text{Pd}, \text{Pt}$ )

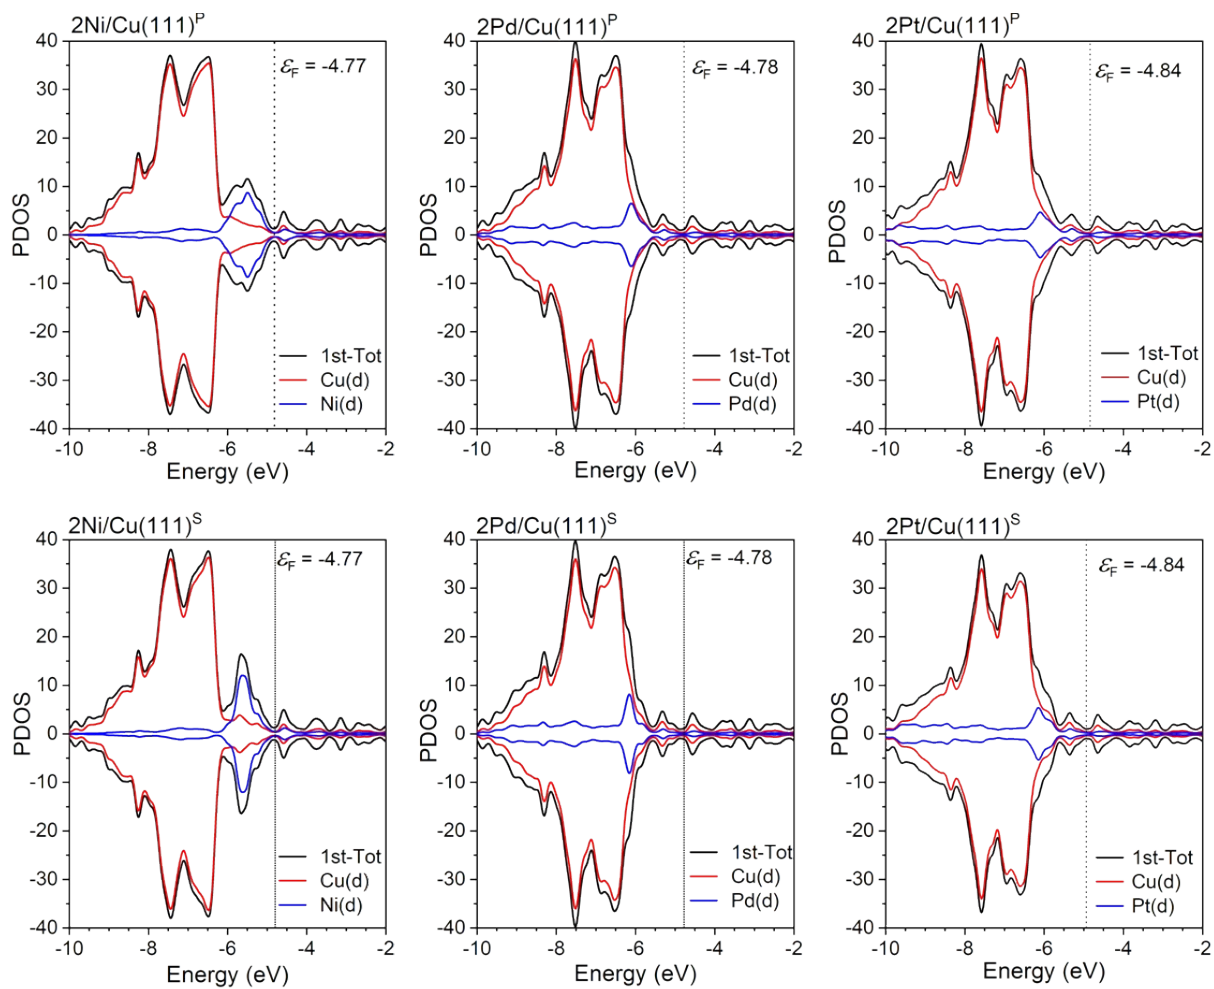

**Figure S12.** The PDOS of the top-layer in  $2X/\text{Cu}(111)$  ( $X = \text{Ni}, \text{Pd}, \text{Pt}$ )

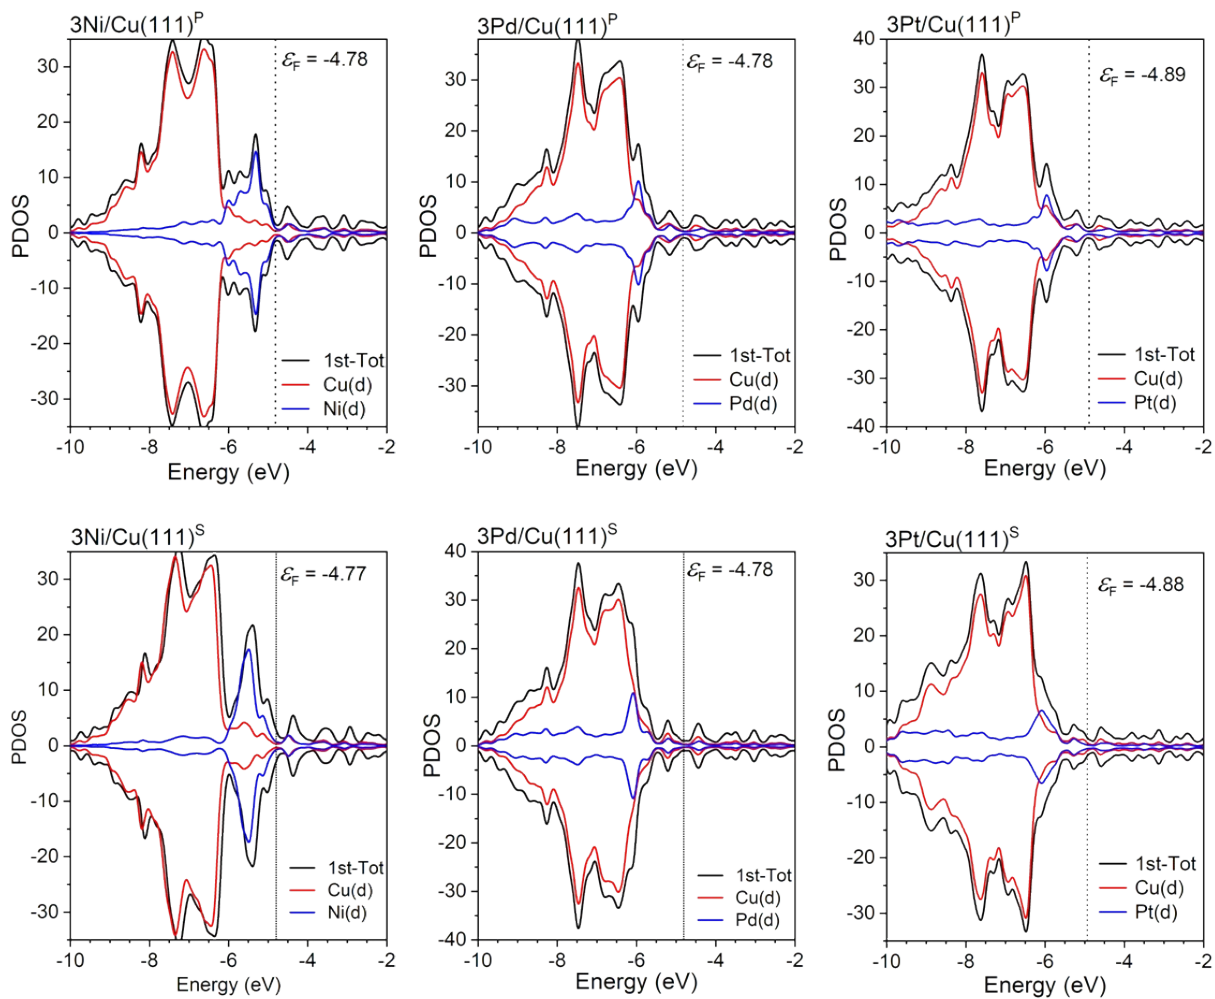

**Figure S13.** The PDOS of the top-layer in  $3X/\text{Cu}(111)$  ( $X = \text{Ni}, \text{Pd}, \text{Pt}$ )

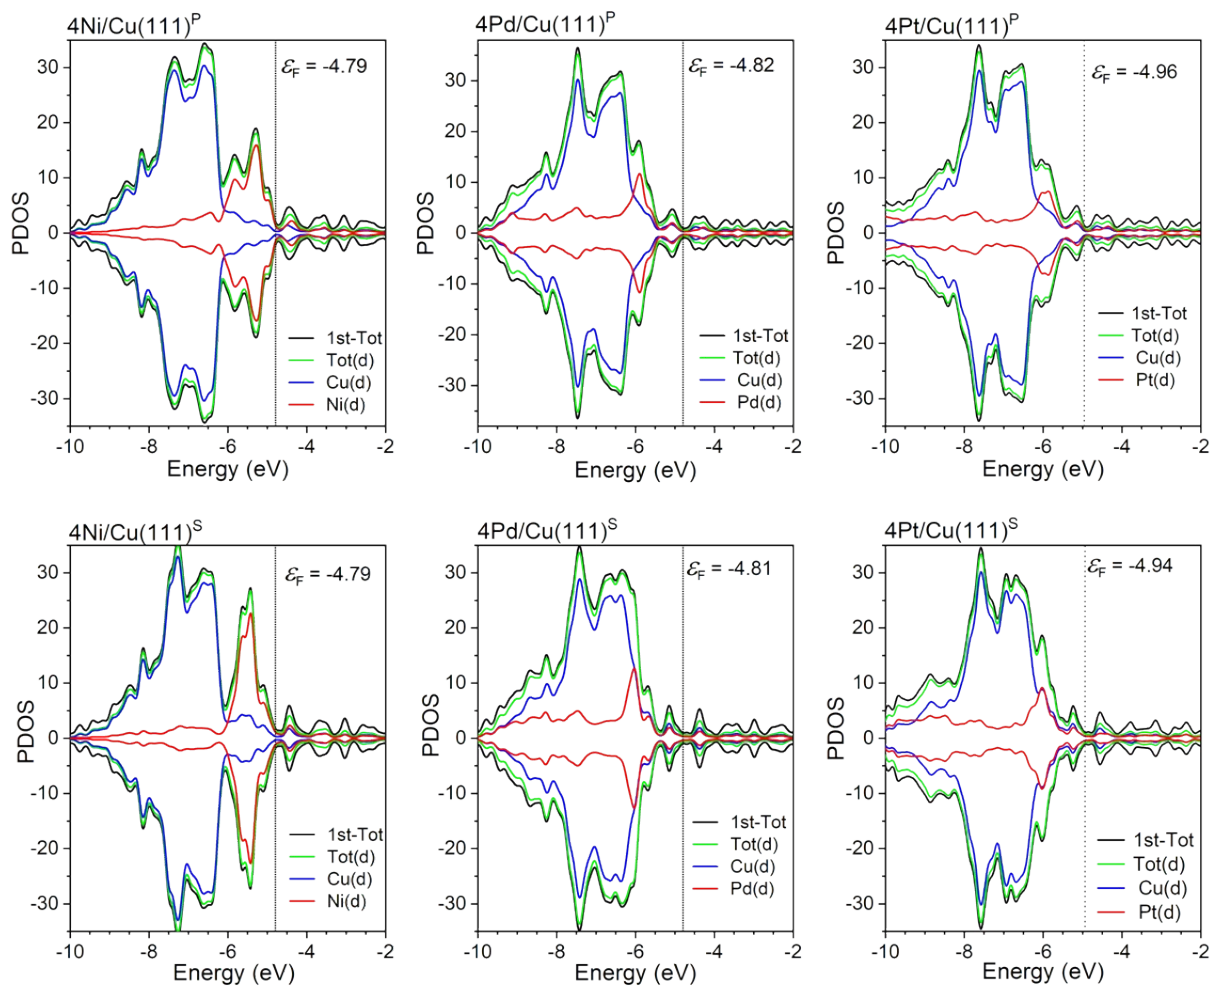

**Figure S14.** The PDOS of the top-layer in 4X/Cu(111) (X = Ni, Pd, Pt)

## 9. Spin density of M around X in nX/M(111)

**Table S9.** The averaged magnetic moments of the M atoms connected to the X atoms and those of the rest M atoms in nX/M(111).

| nX/M(111)       | Averaged magnetic moment on M <sup>a)</sup> |        |        | Averaged magnetic moment on M <sup>b)</sup> |        |        |
|-----------------|---------------------------------------------|--------|--------|---------------------------------------------|--------|--------|
| nX/Ni(111)      | X=Cu                                        | X = Ag | X = Au | X=Cu                                        | X = Ag | X = Au |
| 1X              | 0.665                                       | 0.652  | 0.667  | 0.678                                       | 0.658  | 0.679  |
| 2X <sup>S</sup> | 0.664                                       | 0.669  | 0.665  | 0.682                                       | 0.680  | 0.682  |
| 3X <sup>S</sup> | 0.659                                       | 0.651  | 0.661  | 0.681                                       | 0.683  | 0.680  |
| 4X <sup>S</sup> | 0.639                                       | 0.646  | 0.643  | 0.676                                       | 0.675  | 0.678  |
| 2X <sup>P</sup> | 0.658                                       | 0.663  | 0.661  | 0.683                                       | 0.682  | 0.682  |
| 3X <sup>P</sup> | 0.649                                       | 0.655  | 0.657  | 0.682                                       | 0.680  | 0.680  |
| 4X <sup>P</sup> | 0.636                                       | 0.645  | 0.652  | 0.676                                       | 0.676  | 0.679  |
| nX/Cu(111)      | X=Ni                                        | X = Pd | X = Pt | X=Ni                                        | X = Pd | X = Pt |
| 1X              | 0.000                                       | 0.000  | 0.000  | 0.000                                       | 0.000  | 0.000  |
| 2X <sup>S</sup> | 0.000                                       | 0.000  | 0.000  | 0.000                                       | 0.000  | 0.000  |
| 3X <sup>S</sup> | 0.000                                       | 0.000  | 0.000  | 0.000                                       | 0.000  | 0.000  |
| 4X <sup>S</sup> | 0.000                                       | 0.000  | 0.000  | 0.000                                       | 0.000  | 0.000  |
| 2X <sup>P</sup> | 0.000                                       | 0.000  | 0.000  | 0.000                                       | 0.000  | 0.000  |
| 3X <sup>P</sup> | 0.000                                       | 0.000  | 0.000  | 0.000                                       | 0.000  | 0.000  |
| 4X <sup>P</sup> | 0.000                                       | 0.000  | 0.000  | 0.000                                       | 0.000  | 0.000  |

a): the averaged magnetic moment among the M atoms connected to the X atoms.

b): the averaged magnetic moment among the rest M moiety except those M atoms connected to the X atoms.





## 10. A-B bond strength and valence orbital energies of A and B

Stabilization energy  $\Delta E(A-B)$  by spin pairing is approximately represented by the equation  $\Delta E(A-B) = \sqrt{(\epsilon_A - \epsilon_B)^2 + 4\beta^2}$  on the basis of simple Hückel MO theory, where  $\epsilon_A$  and  $\epsilon_B$  are valence orbital energies of A and B, respectively, and  $\beta$  is resonance integral. This equation indicates that  $\Delta E(A-B)$  becomes larger as the energy difference in valence orbital ( $\epsilon_A - \epsilon_B$ ) increases when  $\beta$  does not differ very much, as is shown in Scheme S4. The larger orbital energy difference between the X atom /  $X_n$  cluster and the  $[M(111) - nM]$  host with defects leads to the formation of stronger interaction with a larger stabilization energy.

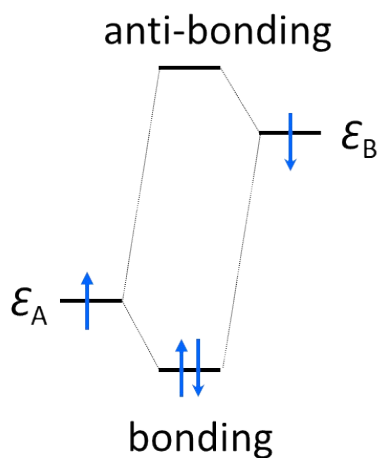

**Scheme S4.** Orbital interaction between A and B species

## 11. Frontier orbitals of $X_n$ clusters in $nX/M(111)^P$

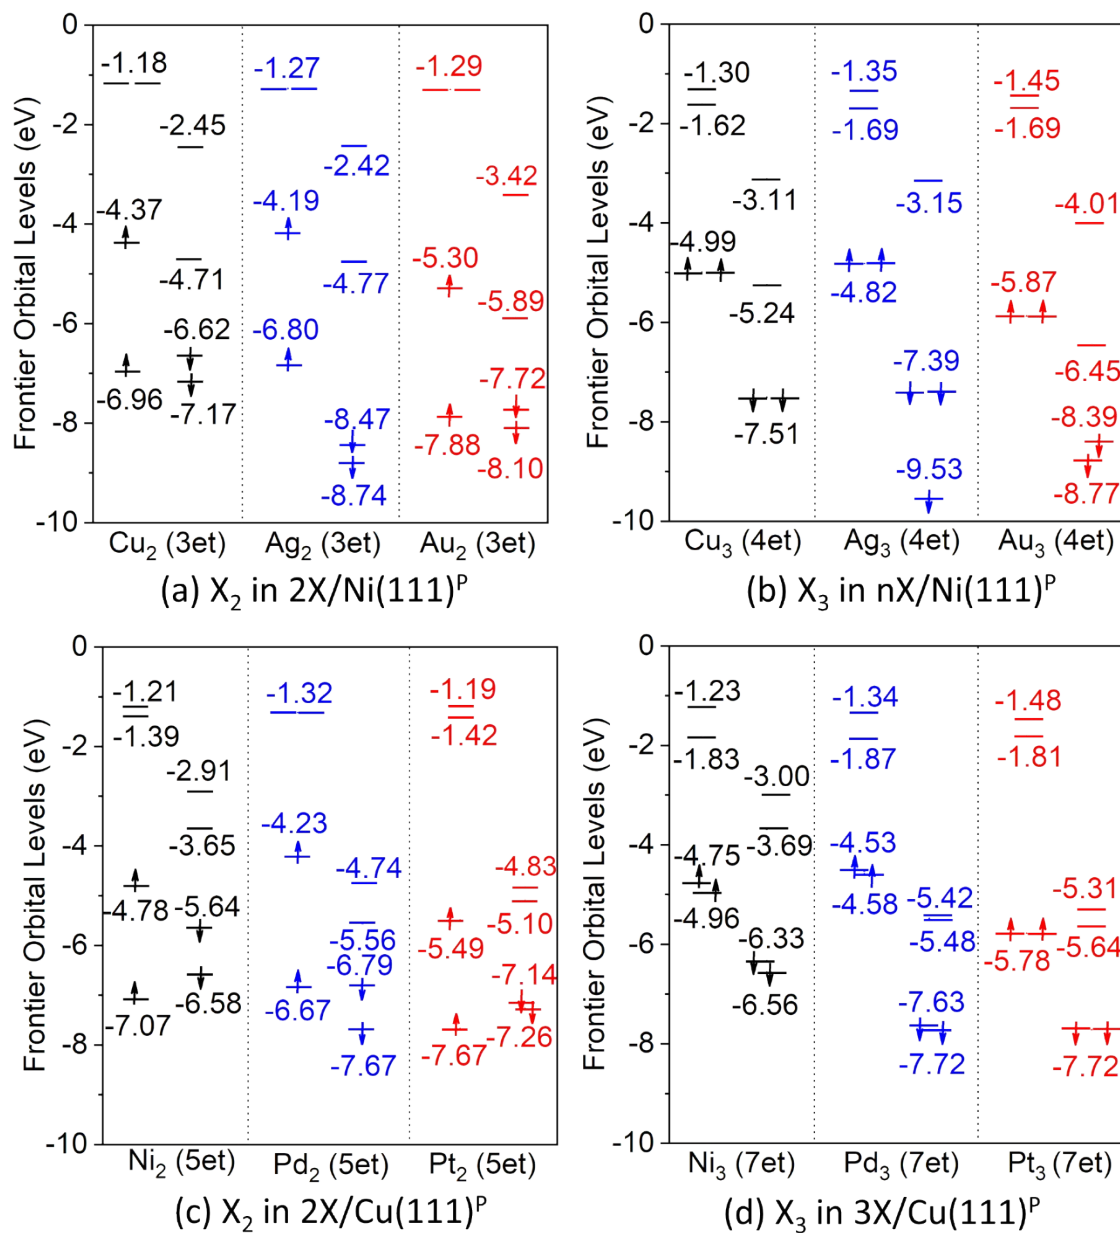

**Figure S15.** Energy levels of frontier orbitals of  $X_2$  and  $X_3$  clusters, where the geometry of  $X_n$  cluster was taken to be the same as that of  $nX/M(111)^P$  at the B3LYP/SDD level.

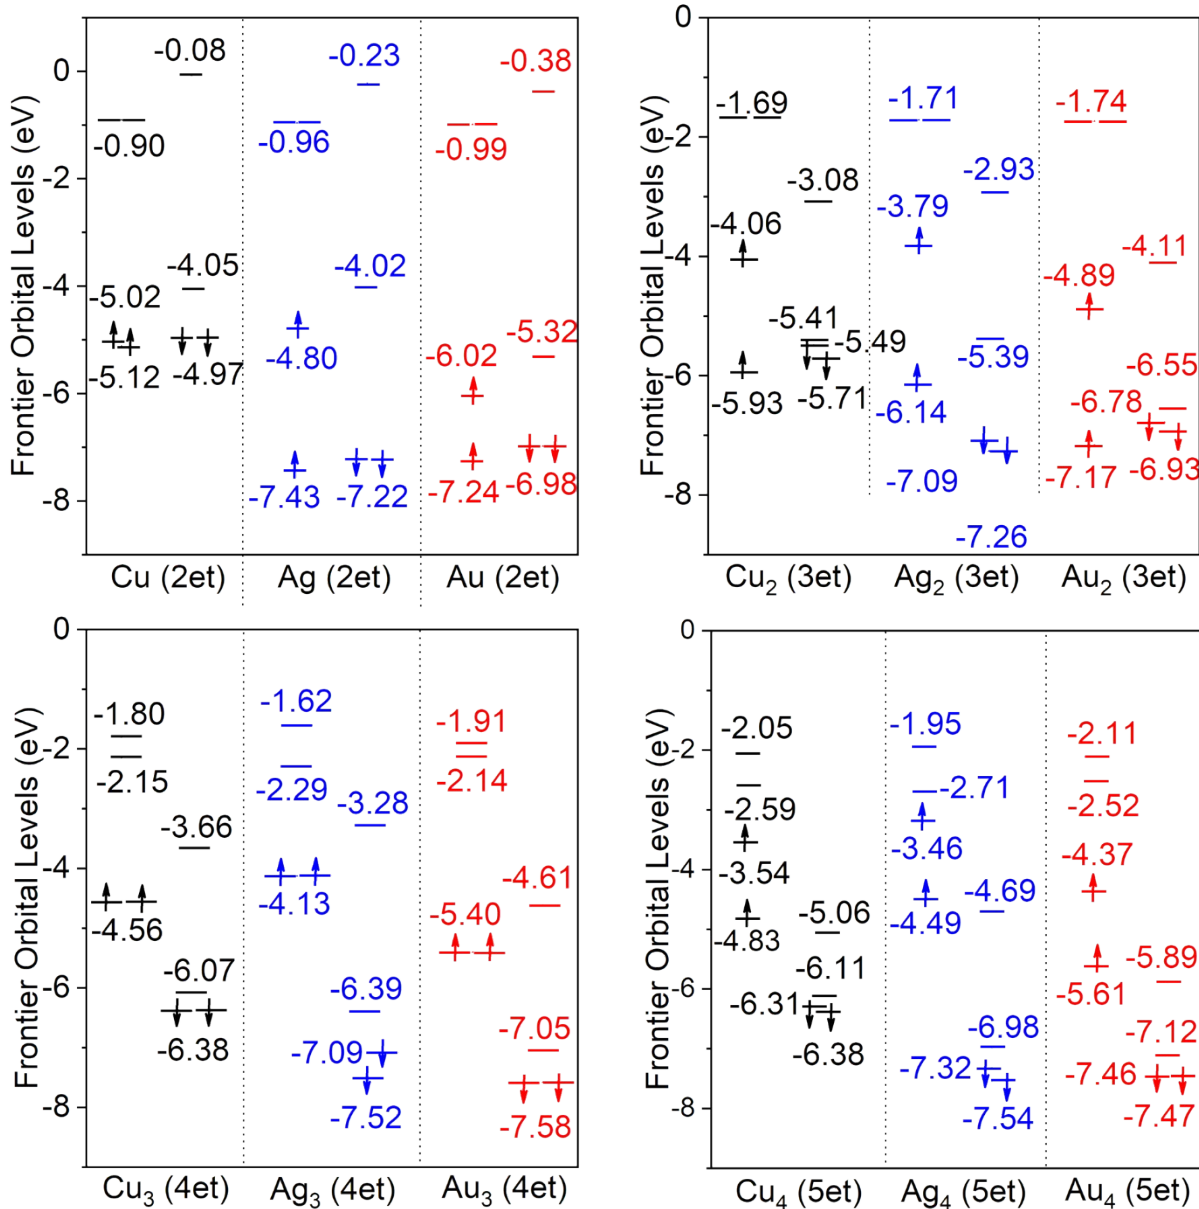

**Figure S16.** Energy levels of frontier orbitals of  $X_n$  clusters, where the geometry of  $X_n$  cluster was taken to be the same as that of  $nX/\text{Ni}(111)^P$  at the PBE/SDD level.

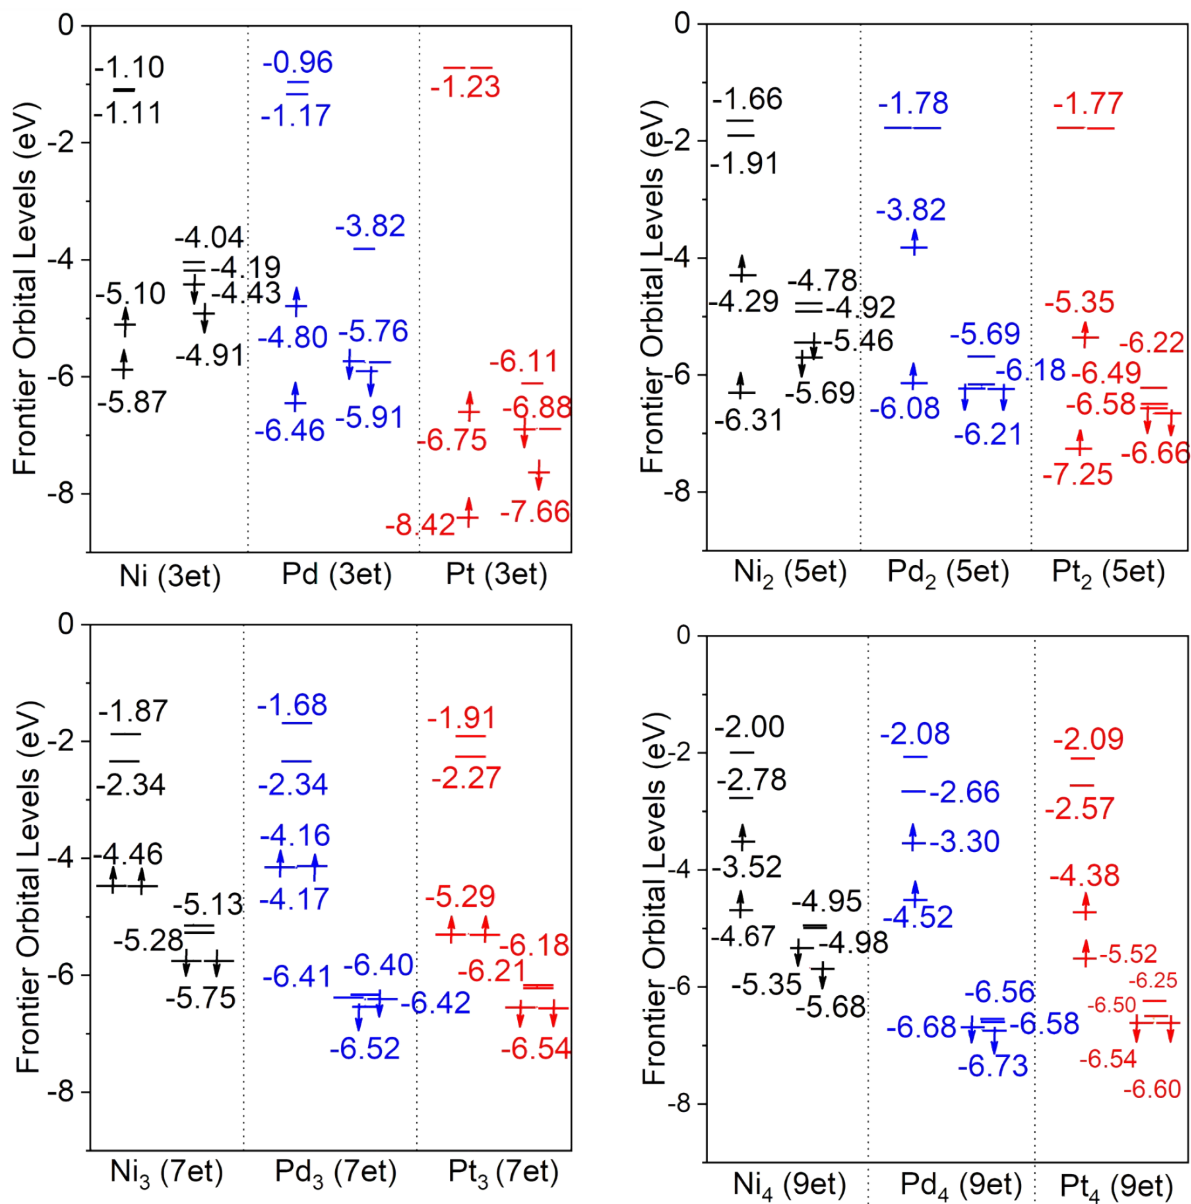

**Figure S17.** Energy levels of frontier orbitals of  $X_n$  clusters, where the geometry of  $X_n$  cluster was taken to be the same as that of  $nX/Cu(111)^P$  at the PBE/SDD level.

**12. Adsorption sites, adsorption energy, and the Bader charge of CO adsorbed to the surfaces of M(111) and nX/M(111)**

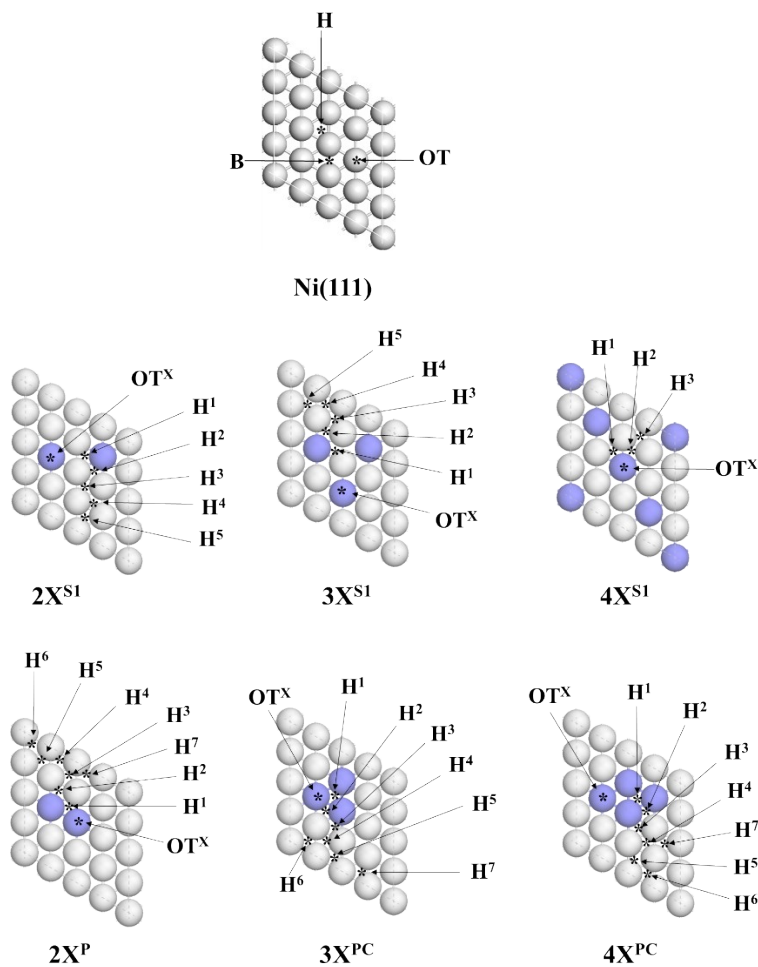

**Scheme S5.** The definition of various H sites for CO adsorption to the nX/Ni(111) ( $n = 0 \sim 4$ ) surfaces

**Table S10.** The CO adsorption energy (eV) at the hollow (H), bridge (B), and on-Top (OT) sites on M(111)

|         | H     | B     | OT    |
|---------|-------|-------|-------|
| Ni(111) | -1.92 | -1.79 | -1.56 |
| Cu(111) | -0.95 | -0.87 | -0.78 |
| Pd(111) | -2.03 | -2.03 | -1.43 |

Pt(111)

-1.88

-1.84

-1.77

**Table S11.** The CO adsorption energy (eV) at the several important sites on nX/Ni(111) shown in Scheme S5

| Alloys           |                          | Sites                    |                          |                |                |                |                |
|------------------|--------------------------|--------------------------|--------------------------|----------------|----------------|----------------|----------------|
| 2X <sup>S1</sup> | H <sup>1</sup>           | H <sup>2</sup>           | H <sup>3</sup>           | H <sup>4</sup> | H <sup>5</sup> |                |                |
| X = Cu           | Change to B              | Change to H <sup>3</sup> | -1.93                    | -1.92          | -1.91          |                |                |
| X = Ag           | Change to B              | Change to H <sup>3</sup> | -1.83                    | -1.85          | -1.86          |                |                |
| X = Au           | Change to B              | Change to H <sup>3</sup> | -1.82                    | -1.87          | -1.88          |                |                |
| 3X <sup>S1</sup> | H <sup>1</sup>           | H <sup>2</sup>           | H <sup>3</sup>           | H <sup>4</sup> | H <sup>5</sup> |                |                |
| X = Cu           | Change to B              | Change to B              | -1.93                    | -1.92          | -1.91          |                |                |
| X = Ag           | Change to B              | Change to H <sup>3</sup> | -1.83                    | -1.82          | -1.85          |                |                |
| X = Au           | Change to B              | Change to H <sup>3</sup> | -1.79                    | -1.77          | -1.86          |                |                |
| 4X <sup>S1</sup> | H <sup>1</sup>           | H <sup>2</sup>           | H <sup>3</sup>           |                |                |                |                |
| X = Cu           | Change to B              | Change to H <sup>3</sup> | -1.95                    |                |                |                |                |
| X = Ag           | Change to B              | Change to H <sup>3</sup> | -1.79                    |                |                |                |                |
| X = Au           | Change to B              | Change to H <sup>3</sup> | -1.70                    |                |                |                |                |
| 2X <sup>P</sup>  | H <sup>1</sup>           | H <sup>2</sup>           | H <sup>3</sup>           | H <sup>4</sup> | H <sup>5</sup> | H <sup>6</sup> | H <sup>7</sup> |
| X = Cu           | Change to T              | Change to H <sup>3</sup> | -1.93                    | -1.90          | -1.92          | -1.90          |                |
| X = Ag           | Change to T              | Change to H <sup>3</sup> | -1.83                    | -1.85          | -1.86          | -1.82          |                |
| X = Au           | Change to H <sup>7</sup> | Change to H <sup>3</sup> | -1.82                    | -1.86          | -1.89          | -1.85          | -1.86          |
| 3X <sup>PC</sup> | H <sup>1</sup>           | H <sup>2</sup>           | H <sup>3</sup>           | H <sup>4</sup> | H <sup>5</sup> | H <sup>6</sup> | H <sup>7</sup> |
| X = Cu           | -0.90                    | Change to T              | Change to H <sup>4</sup> | -1.95          | -1.92          | -1.91          | -1.94          |
| X = Ag           | -0.24                    | Change to T              | Change to H <sup>4</sup> | -1.84          | -1.86          | -1.86          | -1.84          |
| X = Au           | -0.27                    | Change to H <sup>5</sup> | Change to H <sup>4</sup> | -1.77          | -1.84          | -1.85          | -1.75          |
| 4X <sup>PC</sup> | H <sup>1</sup>           | H <sup>2</sup>           | H <sup>3</sup>           | H <sup>4</sup> | H <sup>5</sup> | H <sup>6</sup> | H <sup>7</sup> |
| X = Cu           | -0.93                    | Change to T              | Change to H <sup>4</sup> | -1.94          | -1.90          | -1.94          |                |
| X = Ag           | -0.26                    | Change to T              | -1.82                    | -1.82          | -1.84          | -1.82          |                |
| X = Au           | -0.28                    | Change to H <sup>7</sup> | Change to H <sup>3</sup> | -1.73          | -1.82          | -1.73          | -1.83          |

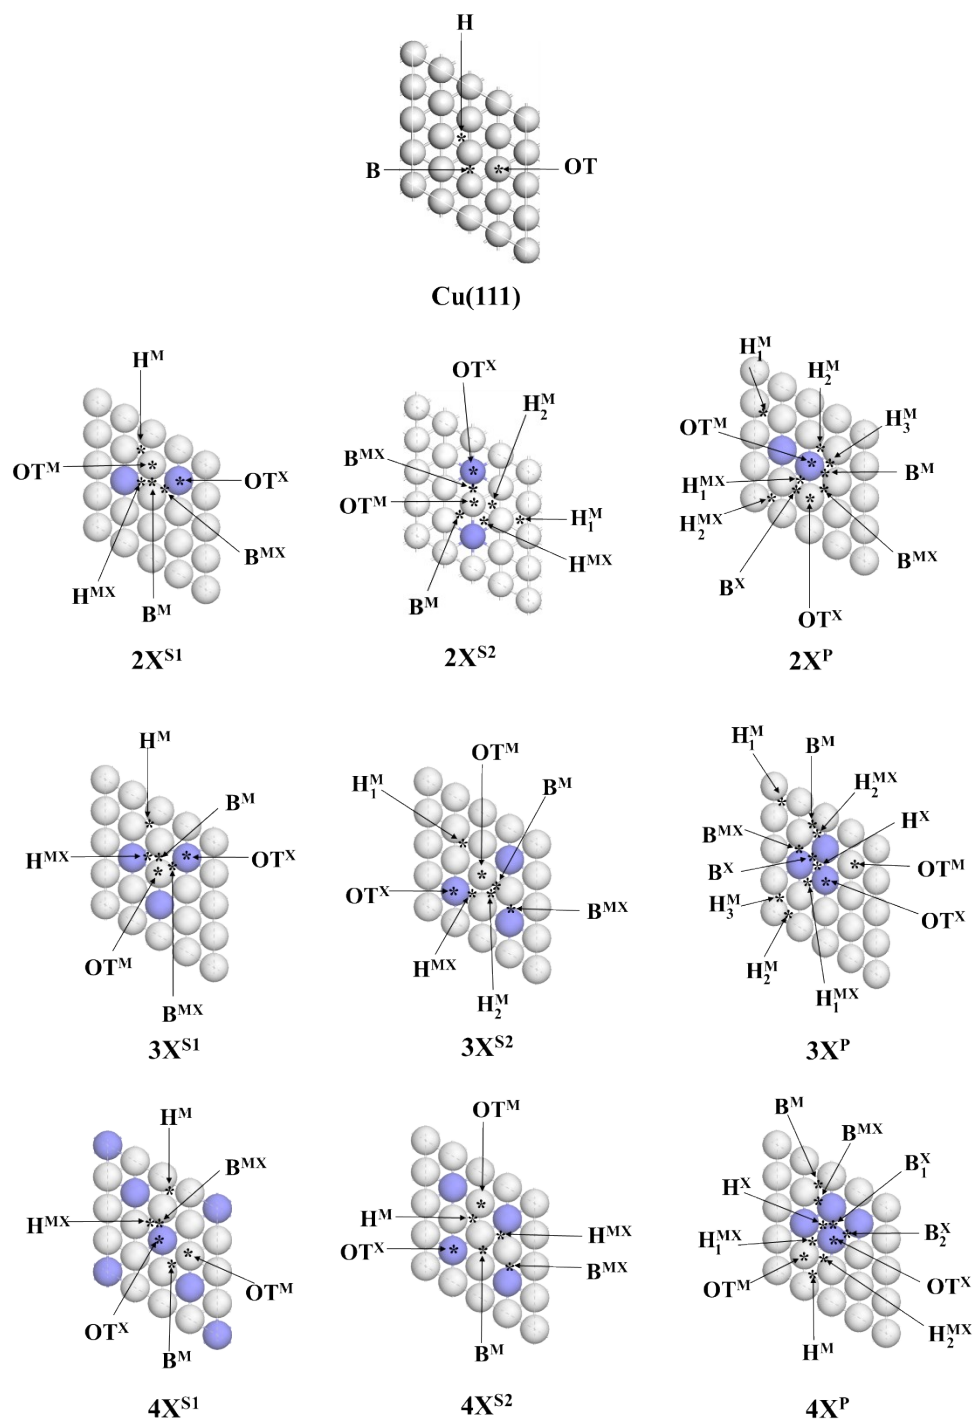

**Scheme S6.** The CO adsorption sites on the Cu(111) and  $nX/Cu(111)$  surfaces





**Table S12.** The CO adsorption energy (eV) at the several important sites on the nX/Cu(111) surfaces shown in Scheme S6

|           |         |                 |            |            |            |          |        |
|-----------|---------|-----------------|------------|------------|------------|----------|--------|
| $2X^{S1}$ | $H^M$   | $B^M$           | $OT^M$     | $H^{MX}$   | $B^{MX}$   | $OT^X$   |        |
| X = Ni    | -0.85   | \ <sup>a)</sup> | -0.87      | \          | \          | -1.70    |        |
| X = Pd    | -0.79   | \               | \          | -1.02      | -1.00      | -1.15    |        |
| $2X^{S2}$ | $H_1^M$ | $H_2^M$         | $B^M$      | $OT^M$     | $H^{MX}$   | $B^{MX}$ | $OT^X$ |
| X = Pt    | -0.85   | -0.72           | \          | -0.56      | \          | \        | -1.51  |
| $2X^P$    | $H_1^M$ | $H_2^M$         | $H_3^M$    | $H_1^{MX}$ | $H_2^{MX}$ | $B^X$    | $OT^X$ |
| X = Ni    | -0.47   | -0.48           | -0.46      | \          | \          | -1.48    | -1.43  |
| X = Pd    | -0.82   | -0.84           | \          | -1.28      | -1.03      | -1.29    | -1.14  |
| X = Pt    | -0.71   | -0.85           | \          | \          | \          | -1.43    | -1.43  |
| $3X^{S1}$ | $H^M$   | $B^M$           | $OT^M$     | $H^{MX}$   | $B^{MX}$   | $OT^X$   |        |
| X = Ni    | -0.87   | $OT^X$          | -0.67      | To $OT^X$  | To $OT^X$  | -1.69    |        |
| X = Pd    | -0.80   | $H^{MX}$        | -0.61      | -1.00      | -0.97      | -1.14    |        |
| $3X^{S2}$ | $H_1^M$ | $H_2^M$         | $OT^M$     | $H^{MX}$   | $B^{MX}$   | $OT^X$   |        |
| X = Pt    | -0.83   | -0.64           | -0.54      | To $OT^X$  | To $OT^X$  | -1.50    |        |
| $3X^{PC}$ | $H_1^M$ | $H_2^M$         | $H_3^M$    | $H^X$      | $B^X$      | $OT^X$   |        |
| X = Ni    | -0.86   | -0.85           | -0.86      | -2.16      | $H^X$      | -1.67    |        |
| X = Pd    | -0.79   | -0.79           | -0.79      | -1.48      | $H^X$      | -1.12    |        |
| X = Pt    | /       | -0.80           | -0.75      | -1.43      | -1.43      | -1.37    |        |
| $4X^{S1}$ | $H^M$   | $B^M$           | $OT^M$     | $H^{MX}$   | $B^{MX}$   | $OT^X$   |        |
| X = Ni    | -0.87   | To $OT^X$       | -0.70      | /          | /          | -1.70    |        |
| X = Pd    | -0.77   | /               | -0.84      | -1.01      | -0.97      | -1.13    |        |
| $4X^{S2}$ | $H^M$   | $B^M$           | $OT^M$     | $H^{MX}$   | $B^{MX}$   | $OT^X$   |        |
| X = Pt    | -0.64   | /               | -0.55      | /          | /          | -1.48    |        |
| $4X^{PC}$ | $H^M$   | $H^X$           | $H_2^{MX}$ | $B_2^X$    | $OT^X$     |          |        |
| X = Ni    | -0.87   | -2.14           | /          | /          | /          |          |        |
| X = Pd    | -0.76   | -1.47           | -1.04      | -1.28      | -1.11      |          |        |

X = Pt      -0.72      -1.36      /      -1.31      -1.31

a) Adsorptions of CO at these sites were not calculated.

**Table S13.** The adsorption energy ( $E_{\text{ads}(\text{CO})}$  in eV) and C-O bond stretching vibration frequency ( $\nu_{(\text{C-O})}$  in  $\text{cm}^{-1}$ ) of CO at the hollow site of Ni(111) and Cu(111)

| Models  | $E_{\text{ads}(\text{CO})}$ | the functional used | the model size | Ref.        |
|---------|-----------------------------|---------------------|----------------|-------------|
| Ni(111) | -1.92 eV                    | PBE                 | p(4x4)         | [This work] |
|         | -1.92 eV                    | PBE                 | p(3x3)         | [ref. S1]   |
|         | -1.90 eV                    | PBE                 | p(3x3)         | [ref. S2]   |
|         | -1.89 eV                    | PBE                 | p(2x4)         | [ref. S3]   |
|         | -1.86 eV                    | PBE                 | p(2x2)         | [ref. S4]   |
| Cu(111) | -0.95 eV                    | PBE                 | p(4x4)         | [This work] |
|         | -0.87 eV                    | PBE                 | p(2x4)         | [ref. S5]   |
|         | -0.86 eV                    | PW91                | p(3x3)         | [ref. S6]   |
|         | -0.78 eV                    | PW91                | p(3x3)         | [ref. S7]   |

| Models                   | $\nu_{(\text{C-O})}$                    | Ref.           |
|--------------------------|-----------------------------------------|----------------|
| Ni(111)                  | 1759 $\text{cm}^{-1}$                   | [This work]    |
|                          | ~1850 $\text{cm}^{-1}$ (large coverage) | [Exp. Ref. S8] |
|                          | ~1816 $\text{cm}^{-1}$ (small coverage) | [Exp. Ref. S9] |
| 4Au/Ni(111) <sup>S</sup> | 1774 $\text{cm}^{-1}$                   | [This work]    |
| Ni-based Au alloy        | 1862 $\text{cm}^{-1}$ (large coverage)  | [Exp. Ref. S8] |
| Cu(111)                  | 1805 $\text{cm}^{-1}$                   | [This work]    |
|                          | 1814 $\text{cm}^{-1}$ (small coverage)  | [ref. S10]     |

## REFERENCES

[S1] Zhu, Y.-A.; Chen, D.; Zhou, X.-G.; Yuan, W.-K. DFT studies of dry reforming of methane on Ni catalyst. *Catal. Today*, **2009**, *148*, 260–267.

[S2] Carrasco, J.; Barrio, L.; Liu, P.; Rodriguez, J.; Ganduglia-Pirovano, M. V. Theoretical studies of the adsorption of CO and C on Ni(111) and Ni/CeO<sub>2</sub>(111): evidence of a strong metal–support interaction. *J. Phys. Chem. C*, **2013**, *117*, 8241–8250.

[S3] Guo, X.; Liu, H.; Wang, B.; Wang, Q.; Zhang, R. Insight into C + O(OH) reaction for carbon elimination on different types of CoNi(111) surfaces: a DFT study. *RSC Adv.*, **2015**, *5*, 19970.

[S4] Liu, H.; Zhang, R.; Ding, F.; Yan, R.; Wang, B.; Xie, K. A first-principles study of C + O reaction on NiCo(111) surface. *Appl. Surf. Sci.*, **2011**, *257*, 9455–9460.

- [S5] Stroppa, A.; Termentzidis, K.; Paier, J.; Kresse, G.; Hafner, J. CO adsorption on metal surfaces: A hybrid functional study with plane-wave basis set. *Phys. Rev. B*, **2007**, *76*, 195440.
- [S6] Grabow, L. C.; Mavrikakis, M. Mechanism of methanol synthesis on Cu through CO<sub>2</sub> and CO hydrogenation. *ACS Catal.* **2011**, *1*, 365–384.
- [S7] Wang, Y.-X.; Wang, G.-C. A Systematic theoretical study of water gas shift reaction on Cu(111) and Cu(110): potassium effect. *ACS Catal.* **2019**, *9*, 2261–2274.
- [S8] Beniya, A.; Ikuta, Y.; Isomura, N.; Hirata, H.; Watanabe, Y. Synergistic promotion of NO-CO reaction cycle by gold and nickel elucidated using a well-defined model bimetallic catalyst surface. *ACS Catal.* **2017**, *7*, 1369–1377.
- [S9] Smirnov, K. S.; Raseev, G. Coverage dependent IR frequency shift of CO molecules adsorbed on Ni (111) surface. *Surf. Sci.* **1997**, *384*, 875–879.
- [S10] Hayden, B. E.; Kretzschmar, K.; Bradshaw, A. M. An infrared spectroscopic study of CO on Cu(111): The linear, bridging and physisorbed species. *Surf. Sci.* **1985**, *155*, 553-566.
